# Supplementary material for: Unraveling molecular characteristic of fluoride neurotoxicity on U87 glial-like cells: insights from transcriptomic and proteomic approach
Source: Front Cell Neurosci. 2023 Jun 9;17:1153198. doi: 10.3389/fncel.2023.1153198 (PMC10289037; doi:10.3389/fncel.2023.1153198)
Supplement: Supplementary file 1 [file Table_1.XLSX]

## Sheet: 0.095 x Control
Supplementary table 1: Genes regulated on U87 glial-like cells over 10 days of fluoride exposure. Group comparison is given in different sheets. Fold change is show in linear range. Genes were considered when LogFC > 1 and p-value was achieved by paired t-test and false discovery rate (FDR) correction was done by Benjamini Hochberg method.
Gene symbol	Row	Col	ControlType	ProbeName	SystematicName	Symbol	logFC	AveExpr	t	P.Value	adj.P.Val	B
Down-regulated genes
PRDM8	32	15	0	A_33_P3342126	NM_020226	PRDM8	-1.00000775474068	8.1771137372381	-4.20859533019283	0.00206420857064158	0.0166156041843797	-1.43570273483058
LOC283663	131	156	0	A_32_P8813	NR_024433	LOC283663	-1.00037487447523	9.43402086764108	-5.32189980487272	0.000413587460368501	0.00638588685163726	0.217923607905236
ANKZF1	1	160	0	A_23_P119907	NM_018089	ANKZF1	-1.00078299179279	9.7966209439608	-4.63718640837175	0.00108841963829377	0.0112000072624426	-0.777981970493502
CKAP2	15	47	0	A_24_P99090	NM_018204	CKAP2	-1.0015297962923	8.79729949764293	-5.18298133606348	0.00050056229341894	0.00717029560935627	0.0214995223104966
FBXL16	140	85	0	A_23_P406385	NM_153350	FBXL16	-1.00183817599483	9.14482783656754	-6.73361412170404	6.90233351943232e-05	0.00247744724924525	2.05325873353731
ZDHHC12	80	15	0	A_33_P3356701	NM_032799	ZDHHC12	-1.00344090525915	12.5700061418594	-7.2840841228053	3.67465023927684e-05	0.00189693058856098	2.69377279604373
HOXA6	378	142	0	A_33_P3377519	ENST00000222728	HOXA6	-1.01154378672022	6.19000174934804	-7.34223310016704	3.44486390910688e-05	0.00186798627262423	2.7591438814015
PDIA5	255	84	0	A_33_P3254634	NM_006810	PDIA5	-1.01298767436674	9.82249723430022	-3.41535200520122	0.00720381170536358	0.0367665147365296	-2.71147443247381
PRRT3	366	73	0	A_23_P80626	NM_207351	PRRT3	-1.01302470384693	9.78342804708484	-4.96327978528611	0.000680772694749511	0.00860697366748104	-0.295030211397081
BNC2	28	80	0	A_32_P133916	NM_017637	BNC2	-1.01341565209963	6.81227450660325	-4.32119987586173	0.00174031025220424	0.0151493603450705	-1.26047481979075
LOC100505933	296	10	0	A_33_P3310961	NR_038943	LOC100505933	-1.01397584886697	6.52259446653241	-5.05527713379929	0.000598019219186756	0.00793093326145958	-0.161612258882309
RNF26	120	100	0	A_23_P64630	NM_032015	RNF26	-1.01449428932277	12.7418628198329	-7.79986369931495	2.09898547210719e-05	0.00155110145027158	3.25900964303633
LOC100134663	215	106	0	A_24_P152468	XR_108776	LOC100134663	-1.01540731053674	9.24962177059388	-3.20784908702089	0.0101096709848392	0.0455295344753592	-3.0539489775147
CCDC18	21	164	0	A_33_P3327165	NM_206886	CCDC18	-1.01551655635508	8.54809516290174	-6.79922834395319	6.39076324577895e-05	0.00241753443926038	2.13170950584367
CECR5-AS1	162	143	0	A_32_P131143	NR_024482	CECR5-AS1	-1.01576911358759	7.15655963118383	-3.76018794592689	0.0041436850173162	0.0254877536024467	-2.14897116904354
ISLR	75	10	0	A_23_P3312	NM_005545	ISLR	-1.01663893502985	6.38932776021724	-6.17288226981545	0.00013621285963779	0.00351433855624368	1.35862339576888
S1PR3	284	80	0	A_33_P3281283	NM_005226	S1PR3	-1.01865320655728	9.95881087368264	-3.91838855506718	0.0032306884886377	0.0218050886607799	-1.89467810008819
CHD3	17	8	0	A_33_P3239287	NM_001005271	CHD3	-1.01873442565803	11.6745612661479	-5.26062647406694	0.000449760308989125	0.0067286175039729	0.131641874244372
PCDHB8	235	63	0	A_23_P41599	NM_019120	PCDHB8	-1.01877644202181	8.69982545921371	-7.56252700802672	2.70636869882411e-05	0.00165333448880887	3.00296470126607
LINC00115	118	88	0	A_23_P149050	NR_024321	LINC00115	-1.01979563129678	8.0605823364149	-3.296941282842	0.00873634605775133	0.0413986518339449	-2.90664085133619
ACPL2	22	111	0	A_23_P57760	NM_152282	ACPL2	-1.01999421242981	7.63025731604538	-5.43044386213022	0.000356967375565643	0.00584088327805039	0.36939082911023
TMSB15B	131	83	0	A_23_P96599	NM_194324	TMSB15B	-1.02171821426622	9.95370316329006	-8.41000357625205	1.12094410121099e-05	0.00122912669752477	3.88709453285118
TCEAL5	313	142	0	A_32_P18470	NM_001012979	TCEAL5	-1.02530259837511	10.8308406731725	-5.86646322941075	0.000200896818508189	0.00418640616379016	0.960157761281852
OBSL1	357	150	0	A_23_P300484	NM_001173408	OBSL1	-1.02761592497896	10.3638895359403	-8.04826220378308	1.61875338608707e-05	0.00139778982486948	3.51983923916703
SLC12A6	224	43	0	A_33_P3212112	NM_001042496	SLC12A6	-1.028221373148	7.92006272381819	-8.35337131005462	1.18634483382309e-05	0.00123424948337758	3.83056004759533
MAGED4B	315	60	0	A_23_P159907	NM_030801	MAGED4B	-1.02911856191957	9.96986393035229	-8.11549721088574	1.51043203159453e-05	0.00137081554699583	3.58921239477539
CCDC102B	254	145	0	A_33_P3347343	NM_001093729	CCDC102B	-1.03123215994588	6.03815856380178	-4.65669079985218	0.00105783791040405	0.0110065021090371	-0.748660691530518
FAM158A	252	82	0	A_23_P88234	NM_016049	FAM158A	-1.03232064316219	11.5652576441341	-5.69458182997121	0.000251206157923365	0.00476841509807218	0.730638110600909
RRAGA	342	41	0	A_23_P169117	NM_006570	RRAGA	-1.03301582820482	13.5668733946112	-5.05468744206088	0.000598513908641115	0.00793093326145958	-0.16246344399024
LOC729013	126	149	0	A_21_P0007122	NR_034137	LOC729013	-1.03301698779953	8.02827527362084	-6.68442240358115	7.31503825109533e-05	0.00253758357496512	1.99406115583025
XLOC_008524	161	29	0	A_21_P0007067	lnc-RPS24-2:1	XLOC_008524	-1.03302958030015	7.23993338340869	-5.53265631931375	0.000311227301176157	0.00541596863207753	0.510413491055095
CLEC2B	297	141	0	A_33_P3332970	NM_005127	CLEC2B	-1.03303761949602	8.34191908788518	-3.70375030550104	0.00453189594958727	0.0271131578706203	-2.24031585271118
ZFP36	356	146	0	A_23_P39237	NM_003407	ZFP36	-1.03337199164324	10.8834237074597	-3.85938491729542	0.00354361513532642	0.0231030947366896	-1.98920644772222
CKAP2L	267	44	0	A_23_P388812	ENST00000435431	CKAP2L	-1.03378465605735	8.61916247665777	-5.20690951263672	0.00048427860793569	0.0070601752315103	0.0555385859248094
SFXN3	322	28	0	A_23_P202138	NM_030971	SFXN3	-1.03455855576858	10.8201578992484	-3.7746817944169	0.00404973107260328	0.0251190999261196	-2.12556393738248
STMN1	264	54	0	A_19_P00316238	NM_001145454	STMN1	-1.03537495549236	10.2246713666979	-7.83430660534611	2.02396233520143e-05	0.00152146900651765	3.29560760622336
TPSG1	94	78	0	A_23_P26294	NM_012467	TPSG1	-1.03639622910758	13.8501323675557	-3.59874936470404	0.0053590184477085	0.0303652229305252	-2.41105950761707
BDKRB2	121	70	0	A_23_P304897	NM_000623	BDKRB2	-1.03655726880331	9.1084197806059	-4.45911191851595	0.00141547225334186	0.0132835340585324	-1.04818404303191
SMAD9	37	116	0	A_24_P655849	NM_001127217	SMAD9	-1.03789034494656	9.2604666458234	-3.75528657862658	0.00417597277637324	0.0256466391461221	-2.15689156428786
RGL2	300	126	0	A_23_P93383	NM_004761	RGL2	-1.03958291719908	10.0678901692754	-5.70231133253992	0.000248672633329557	0.00476100309175663	0.741053224945261
FAM117A	114	3	0	A_23_P78053	NM_030802	FAM117A	-1.04000449942567	8.23474504172151	-7.17117666443139	4.17000768237017e-05	0.00197422451456047	2.56561500340194
EFCAB3	360	83	0	A_33_P3264042	NM_001144933	EFCAB3	-1.04129257571175	6.32630204953032	-4.48082452509892	0.00137051119363724	0.0130309286921056	-1.01499964324532
XLOC_008149	214	1	0	A_21_P0006532	ENST00000602507	XLOC_008149	-1.0415718168693	7.254109949898	-3.42157710023384	0.00713141159723633	0.0364802312070367	-2.70123743118052
UBE2S	89	76	0	A_32_P171328	NM_014501	UBE2S	-1.04262837632601	14.7326430409676	-7.53486485340888	2.78881517729798e-05	0.00168474127516769	2.97267775313614
STON1	380	95	0	A_23_P302005	NM_006873	STON1	-1.04623536890562	6.57897852003473	-4.67598397644301	0.00102848842298044	0.0108995818418264	-0.719710738327076
RIPK4	358	120	0	A_24_P125871	NM_020639	RIPK4	-1.04651148505656	9.02056588085921	-3.65967477805163	0.00486151236774715	0.0284702206040423	-2.3118653529032
ATP5L2	47	34	0	A_33_P3791123	NM_001165877	ATP5L2	-1.04691639877501	10.6407804100341	-3.73442537252561	0.00431637809615613	0.0262150669693152	-2.19062919245371
MYLIP	237	69	0	A_33_P3255914	NM_013262	MYLIP	-1.04832266047763	7.14802644332157	-7.31771312594672	3.53979132129527e-05	0.00188645695930457	2.73163059791361
TP53TG1	178	39	0	A_23_P145895	NR_015381	TP53TG1	-1.04889458763155	9.02518763430744	-4.46127567936341	0.00141092201457359	0.0132564925887316	-1.04487412601668
SNCA	17	57	0	A_23_P29939	NM_007308	SNCA	-1.05148102627707	8.67935877551425	-3.68151242187541	0.00469517056212296	0.0278138963053727	-2.27639269492507
FLJ45248	203	115	0	A_21_P0005617	ENST00000517910	FLJ45248	-1.05170565281615	9.96181706299208	-9.21345527662593	5.17248649426468e-06	0.000856757415970281	4.65272044866538
GBP5	250	103	0	A_23_P74290	NM_052942	GBP5	-1.05311599719654	6.77305245143615	-5.62395381374455	0.000275690295093128	0.00504046882444144	0.635060369407876
POLH	45	104	0	A_32_P96692	NM_006502	POLH	-1.05389592848973	8.60214428814687	-7.90136514386889	1.88615749375227e-05	0.00146493539842908	3.36646088071368
PHF19	132	119	0	A_23_P401904	NM_001009936	PHF19	-1.0563904414655	11.2523000394114	-7.13053666479834	4.36574106811874e-05	0.00201636320029856	2.51908576174593
WNT3	140	43	0	A_23_P130158	NM_030753	WNT3	-1.05774026930553	9.48655216780683	-4.5931356834211	0.00116101595224648	0.0116674392468641	-0.844404570099933
CDK1	7	38	0	A_23_P138507	NM_001786	CDK1	-1.05801477258693	11.1563273791548	-4.13066688377265	0.00232543068018824	0.0178411120008569	-1.55793313387762
XLOC_011130	121	3	0	A_19_P00808072	lnc-RTL1-2:1	XLOC_011130	-1.06004483103725	8.09566376097954	-3.15782086508845	0.0109767495107852	0.0477542705989472	-3.13679856169794
IQSEC3	214	95	0	A_33_P3209581	NM_001170738	IQSEC3	-1.06038675708399	8.45310107903059	-3.27614545549637	0.00903862358628472	0.0423490567793841	-2.94099436080877
RPL39L	380	129	0	A_23_P29594	NM_052969	RPL39L	-1.06288130590996	10.6539979818451	-5.61880971542108	0.000277571583862043	0.00505740518853228	0.628070173668624
F11R	53	103	0	A_24_P319364	NM_016946	F11R	-1.06527455222122	9.78268353174505	-8.15479376884984	1.45080781381256e-05	0.001355907914462	3.62952051484833
NDC80	224	64	0	A_23_P50108	NM_006101	NDC80	-1.06712037216964	12.9115701930039	-3.51588624204516	0.00612257904889679	0.0330756667558219	-2.54647688389454
XLOC_l2_013730	172	51	0	A_21_P0013282	TCONS_l2_00026400	XLOC_l2_013730	-1.06723176912182	6.67893867268807	-4.22064238351646	0.00202668475971217	0.0164285548277076	-1.41687648591338
ALDOC	329	61	0	A_23_P78108	NM_005165	ALDOC	-1.06794438780996	10.5572378262928	-6.25837157886821	0.00012248751088027	0.00334153296981104	1.46737941948415
PBK	288	67	0	A_32_P62997	NM_018492	PBK	-1.06838966904099	12.8894205714931	-4.92035259519071	0.000723515634719315	0.00890411805144886	-0.357714414079618
XLOC_013931	336	55	0	A_21_P0010239	ENST00000422473	XLOC_013931	-1.06891819177709	6.37470051054552	-5.18136395904926	0.000501683991206708	0.00717439716677963	0.0191956320459736
XLOC_l2_012374	344	153	0	A_19_P00801917	lnc-FARS2-2:1	XLOC_l2_012374	-1.06917418028144	9.46188882039643	-4.44478063847885	0.00144600712037253	0.013436256688925	-1.07012306590873
TRIM5	180	34	0	A_23_P356526	NM_033092	TRIM5	-1.06934718753515	6.69003652565664	-6.70807204731244	7.11337178360227e-05	0.0025062896482777	2.02256227834211
ZNF618	223	24	0	A_24_P743802	NM_133374	ZNF618	-1.0708453842528	7.78756191224271	-8.0861332218216	1.55673340297665e-05	0.00138175308974821	3.55897804676502
PTGES	368	5	0	A_24_P403417	NM_004878	PTGES	-1.07091879136817	7.79853836858153	-5.57296276977651	0.000294963823339089	0.00524791178635101	0.565596090281738
C11orf67	219	119	0	A_24_P49383	NM_024684	C11orf67	-1.07109020800268	11.3416511048269	-6.20322400548513	0.000131159566380821	0.00345582618682999	1.39734235044943
DBNDD1	292	75	0	A_23_P26439	NM_001042610	DBNDD1	-1.0711991458511	6.48927991340848	-3.84933739743332	0.00360000682255449	0.0233107997494529	-2.00534141715773
XLOC_004929	331	79	0	A_21_P0004157	ENST00000515153	XLOC_004929	-1.0727625139974	7.37189447603479	-3.80618914258848	0.00385312446035433	0.024348121774161	-2.07475449343154
ID3	77	134	0	A_23_P137381	NM_002167	ID3	-1.07459638627827	13.5199977622942	-4.60312770356683	0.00114410741700018	0.0115633451916659	-0.829313647571535
XLOC_005730	306	26	0	A_19_P00321670	ENST00000451910	XLOC_005730	-1.07462738740968	7.97955325900868	-3.74744587208897	0.00422817366027406	0.0259071435073021	-2.16956680948535
KRT15	360	15	0	A_23_P27133	NM_002275	KRT15	-1.07549433773133	9.55669278496861	-6.27469439863367	0.000120041476135637	0.00330828176520966	1.48802628141328
XLOC_l2_000917	259	88	0	A_21_P0010617	ENST00000437410	XLOC_l2_000917	-1.07562564339046	7.65506521561618	-3.9569957816284	0.00304179798817165	0.0209757319601003	-1.83303795844669
LINC00461	64	115	0	A_32_P127350	NR_024384	LINC00461	-1.0757556808495	10.1801973444498	-5.26207446735559	0.000448867262038335	0.00672158629525455	0.133687338750047
KIF11	381	86	0	A_24_P227091	NM_004523	KIF11	-1.07772399012775	11.5494269848553	-4.30861421356441	0.00177367190229895	0.0152572274952494	-1.27997652883508
PLCD1	370	16	0	A_23_P80739	NM_006225	PLCD1	-1.07805168384387	9.39105413104758	-7.27744190713577	3.70194339972929e-05	0.00189693058856098	2.68627839270954
ATP1A4	245	24	0	A_23_P160177	NM_144699	ATP1A4	-1.07852340253503	7.78698704856784	-3.5678927329511	0.00563102580858901	0.0313401822945706	-2.46142073863525
LOC100506844	1	10	0	A_21_P0000744	NR_038269	LOC100506844	-1.08128158122719	10.93154020992	-6.84961488970894	6.02591305362632e-05	0.00234081282169328	2.1915604486319
PURG	28	69	0	A_23_P111919	NM_013357	PURG	-1.08218736304673	6.424735712737	-4.30014540601816	0.00179650256142691	0.015288250202675	-1.29311100573564
LOC100129250	258	150	0	A_24_P136641	NR_033991	LOC100129250	-1.08247794494273	9.01494232619753	-5.09212825484569	0.000567958965470217	0.007707168385008	-0.108522625591896
LOC388630	155	132	0	A_21_P0010612	NM_001194986	LOC388630	-1.08323990642293	6.13399093644595	-7.4786025519553	2.96508547088192e-05	0.00172867436155789	2.91078663357261
IFIT1	296	48	0	A_23_P52266	NM_001548	IFIT1	-1.08341590944535	11.0116403836567	-3.23237171134573	0.00971076536358901	0.0444497551514582	-3.01336954685962
EFCAB4A	172	18	0	A_23_P432545	NM_173584	EFCAB4A	-1.0866640884532	11.1213709588168	-4.150338722558	0.0022563450502405	0.0175128530328389	-1.52700511531018
NUDT6	234	70	0	A_23_P155857	NM_198041	NUDT6	-1.09053962453033	8.90360188058315	-7.39089205371686	3.26459669634201e-05	0.00182633494054514	2.81351908661204
CORO1A	119	2	0	A_23_P106761	NM_007074	CORO1A	-1.09322483794741	6.96200118639578	-4.5300469608773	0.00127412142899139	0.0123811873173182	-0.940014472568923
SAP25	345	14	0	A_21_P0000075	NM_001168682	SAP25	-1.09399118286808	8.97915346903539	-4.84973262730839	0.000800213578525657	0.00940042515319581	-0.461429001372602
GABRA3	68	63	0	A_23_P125618	NM_000808	GABRA3	-1.09441356767991	6.84807937604421	-3.18755121434156	0.0104526279729812	0.0465055595728718	-3.08755374859983
FAM102B	66	28	0	A_24_P237927	NM_001010883	FAM102B	-1.096511682998	8.77589916239515	-4.29720864659501	0.00180449232901965	0.0153478448198417	-1.29766792810301
XLOC_002736	275	119	0	A_19_P00322895	ENST00000473756	XLOC_002736	-1.09873369582506	10.7678639892713	-8.38380673669765	1.15069333793222e-05	0.00122912669752477	3.86098659057637
ATP1A1	200	137	0	A_23_P1072	NM_000701	ATP1A1	-1.09986062467635	12.4476973717542	-5.28831342675312	0.000433010576503823	0.00658341821961028	0.170698679319535
CKS1B	36	3	0	A_23_P45917	NM_001826	CKS1B	-1.10030505536344	11.505893837187	-8.36314251847576	1.17476908351958e-05	0.00123424948337758	3.8403394858781
TMEM54	116	4	0	A_33_P3230219	NM_033504	TMEM54	-1.10343341618253	11.9469921229132	-3.17752796017926	0.0106263855684826	0.0468847580983203	-3.10415308321811
XLOC_014270	269	75	0	A_21_P0010366	lnc-GRAMD4-2:2	XLOC_014270	-1.10385132961312	7.80475341908529	-9.08698537586947	5.82049766841165e-06	0.000921154724276068	4.53656844373313
CIT	285	11	0	A_23_P420551	NM_007174	CIT	-1.10430369767701	9.55838597478083	-5.72567408926327	0.000241181245299815	0.00468445919966193	0.772479625421109
LOC388242	261	62	0	A_32_P135336	NR_002556	LOC388242	-1.10462859354577	8.30688581480778	-5.60464508542352	0.000282823806257371	0.00511206442982606	0.608801870108839
NDRG4	379	83	0	A_23_P140748	NM_022910	NDRG4	-1.10717596618584	10.3479783189524	-7.75268321382031	2.20672493558071e-05	0.00158791374208275	3.20864870768149
SPA17	74	35	0	A_23_P104876	NM_017425	SPA17	-1.11331636867849	9.33159714214114	-8.38207242165285	1.15269308869078e-05	0.00122912669752477	3.85925551134636
ZBTB20-AS1	92	37	0	A_21_P0000867	NR_038993	ZBTB20-AS1	-1.1147952779238	10.4580183996662	-3.17576049831777	0.0106573327511924	0.0469691269766836	-3.1070804725038
CALHM2	44	134	0	A_23_P202219	NM_015916	CALHM2	-1.11574167904819	10.9464307708847	-4.3172057443978	0.00175082497649593	0.0151791129708245	-1.26666150245335
RACGAP1P	238	125	0	A_23_P65041	NR_026583	RACGAP1P	-1.11619662211619	7.4673578783692	-5.40766373369772	0.000368118345426925	0.00595137535154692	0.337748472318825
TCTEX1D2	265	121	0	A_23_P21162	NM_152773	TCTEX1D2	-1.11797853289251	10.7128090674533	-4.44822524754419	0.0014386044179371	0.0134055994089059	-1.06484729369115
DNASE2	113	140	0	A_23_P119266	NM_001375	DNASE2	-1.12025662357931	9.45826196906006	-3.9642253785975	0.00300773986809232	0.0208317816575972	-1.82151421479996
WDR54	154	60	0	A_23_P68072	NM_032118	WDR54	-1.12052039313388	12.866020631773	-9.70110247476283	3.32134781944962e-06	0.000694336502044941	5.08620748971965
HAGH	283	122	0	A_33_P3333488	NM_001040427	HAGH	-1.12262659622051	11.6620917114363	-3.96633090482048	0.00299789668746125	0.0208148910742773	-1.8181592115206
HRCT1	175	33	0	A_23_P94434	NM_001039792	HRCT1	-1.12263707727415	8.53212580261543	-6.25817484654494	0.000122517319521926	0.00334153296981104	1.46713034035105
KIF22	181	33	0	A_23_P54622	NM_007317	KIF22	-1.12479638185546	11.1671281356951	-5.03819509042827	0.000612528688891295	0.00803621454096193	-0.186290147640363
FBXL14	341	89	0	A_23_P36724	NM_152441	FBXL14	-1.12530591862205	6.86567986343595	-5.67744099083716	0.000256924463478436	0.00483651170112013	0.707510135671384
MEIS2	302	125	0	A_23_P88602	NM_170677	MEIS2	-1.12552726619807	8.99682224752159	-10.0314936729865	2.48599579790265e-06	0.000604126731571062	5.36748216445802
XLOC_003281	336	9	0	A_21_P0003184	lnc-ANKUB1-1:1	XLOC_003281	-1.12566492289021	7.30275081203653	-5.26821412925489	0.00044510177178403	0.00669991438421568	0.142356864259099
DIAPH3	240	18	0	A_23_P162719	NM_030932	DIAPH3	-1.12790376535889	8.85025178363047	-3.27080406430336	0.00911799619669708	0.0425828111619998	-2.94982129836735
CALM3	80	106	0	A_24_P219785	NM_005184	CALM3	-1.12840915913643	11.1001769763086	-6.22878235326551	0.000127060451413404	0.00338324139383242	1.42985517974611
XLOC_008088	19	154	0	A_21_P0006520	lnc-ATP2B3-1:1	XLOC_008088	-1.13190401979649	8.30559915328362	-4.64542246178518	0.00107539239666631	0.0111114476023834	-0.765593912282238
HAPLN3	364	131	0	A_33_P3259393	NM_178232	HAPLN3	-1.13378751688479	10.5936972988945	-4.53951492659371	0.00125642356647566	0.0122843431533325	-0.925630038265884
APOLD1	270	2	0	A_23_P48217	NM_030817	APOLD1	-1.13412373556804	7.63388368544763	-3.53371791235093	0.00594918026943078	0.0324144636902319	-2.51728914958107
UBE2C	9	38	0	A_24_P297539	NM_181801	UBE2C	-1.13819189859472	14.0161983350703	-4.75845196465532	0.00091249440693423	0.0101751738190164	-0.596571734363612
ALX4	187	152	0	A_33_P3273068	ENST00000329255	ALX4	-1.13958203376998	6.55478314686192	-4.08529208232608	0.00249346263581504	0.0186780454303768	-1.62945580533054
HMGB3	281	16	0	A_33_P3237359	NM_001301228	HMGB3	-1.14080415449539	9.30756723272909	-7.74756893230216	2.21876164868058e-05	0.00158791374208275	3.20317374650993
CKS2	40	87	0	A_23_P71727	NM_001827	CKS2	-1.14113216445231	14.2717161812208	-8.13094600150291	1.4866781583961e-05	0.00137081554699583	3.60507974085091
YPEL3	289	67	0	A_23_P15108	NM_031477	YPEL3	-1.14118275068298	7.72069931630163	-7.64574976237579	2.47394761060578e-05	0.00158937526028201	3.09352115306234
NES	199	103	0	A_33_P3358233	NM_006617	NES	-1.14133377232321	8.16194160254353	-4.39121855064985	0.00156648306713853	0.0141732818739732	-1.15236922354087
BORA	218	57	0	A_23_P25626	NM_024808	BORA	-1.14327202858979	9.57652294365225	-10.4071975580556	1.80558370128075e-06	0.000531242848999049	5.67579206384858
CD70	20	66	0	A_33_P3243449	NM_001252	CD70	-1.14385156500964	12.4163372765651	-3.39878886233998	0.00740019129070332	0.0372986268118813	-2.73872424255316
PIK3C2B	300	104	0	A_23_P200710	NM_002646	PIK3C2B	-1.14416844967765	7.15447446351542	-3.95254978911321	0.00306294451901417	0.0210484699472739	-1.84012772274107
ST7-AS1	17	139	0	A_32_P181297	NR_002330	ST7-AS1	-1.14570680698161	7.99350718769995	-6.54067982818399	8.68258104037228e-05	0.00275347001136596	1.81918603349977
RACGAP1	291	61	0	A_32_P186474	NM_013277	RACGAP1	-1.14934399879032	10.5801144268207	-5.89243368322662	0.000194294066984314	0.00410497890458349	0.994459326676647
VWA1	316	123	0	A_33_P3395743	NM_022834	VWA1	-1.14978202623399	9.57815189092447	-5.52527965532948	0.000314307109570982	0.00543977271989517	0.500288077695503
GCK	247	140	0	A_33_P3342260	NM_000162	GCK	-1.1499208035054	6.66359056209616	-5.11932941217265	0.000546812502370859	0.0075558816788549	-0.0694651171085887
ADD3	126	38	0	A_24_P90097	NM_016824	ADD3	-1.15153370286474	10.8313435373309	-9.36716133913543	4.48920861879967e-06	0.000798318319517073	4.79178737869893
A4GALT	356	126	0	A_33_P3294002	NM_017436	A4GALT	-1.15348536930768	9.78981933847788	-3.67675023117574	0.00473092988558193	0.0279631748594218	-2.28412452903191
SLC9A3R1	377	156	0	A_33_P3378835	NM_004252	SLC9A3R1	-1.15578523831913	11.198216010992	-6.09273786147168	0.000150603692655218	0.00369342967546362	1.25571641838731
LRRIQ3	170	101	0	A_33_P3292387	NM_001105659	LRRIQ3	-1.15643933524388	8.00905494834462	-7.59909427319266	2.60143521747696e-05	0.00162722845414464	3.04285813416054
UGT1A8	213	47	0	A_33_P3302075	NM_019076	UGT1A8	-1.15701046192217	9.45680498203311	-4.45584210815444	0.00142237810512125	0.0133404624168633	-1.05318712252401
PKN3	264	121	0	A_33_P3220202	NM_013355	PKN3	-1.15743885165947	10.4219814167188	-4.8934151143885	0.000751799679248377	0.00907118660291408	-0.397188854743407
ANP32E	51	159	0	A_33_P3407299	NM_030920	ANP32E	-1.15819270887408	9.33933436851814	-6.45386643569313	9.64139301430276e-05	0.00292484499848556	1.71218909903399
IL21R	54	138	0	A_24_P227927	NM_181078	IL21R	-1.15838994176054	7.69794890797787	-5.12142507313524	0.000545218764544121	0.0075558816788549	-0.066460586739538
KIAA1199	64	62	0	A_23_P324754	NM_018689	KIAA1199	-1.15943908040037	8.21392567856963	-3.83848905940779	0.00366195441253301	0.0235742024741995	-2.02277461064919
PITPNM1	367	129	0	A_23_P1519	NM_004910	PITPNM1	-1.16015383611997	9.79670933226111	-3.68914539630167	0.0046384439619366	0.027611688897433	-2.26400433178255
MT3	234	105	0	A_23_P129629	NM_005954	MT3	-1.16087647288817	10.4191210387937	-3.15908815949357	0.0109538648533102	0.0477542705989472	-3.13469890789178
C4orf34	25	49	0	A_23_P112634	NM_174921	C4orf34	-1.16606753410685	9.38598614045123	-4.92481052891229	0.000718945843676922	0.0088706825470488	-0.35119205293794
REEP4	135	87	0	A_23_P96209	NM_025232	REEP4	-1.16701025091631	11.964778099606	-6.49029420881244	9.22574817923227e-05	0.00287179312623841	1.75721358937543
STC1	289	50	0	A_23_P314755	NM_003155	STC1	-1.16717718536926	8.29725282250881	-6.0423495324088	0.000160489378374509	0.00382287142970643	1.19054300219594
LOC84989	51	13	0	A_33_P3789382	NR_027182	LOC84989	-1.16783904352908	7.30178151581168	-10.0605147077743	2.424468562941e-06	0.000601874320750104	5.39172790900323
PGAM4	79	128	0	A_33_P3268343	NM_001029891	PGAM4	-1.16956014691673	12.6851203845279	-3.56403655369806	0.00566601878640036	0.0314187943310217	-2.46772000992603
AKR1C3	254	60	0	A_23_P138541	NM_003739	AKR1C3	-1.17240408589418	11.7886152909462	-3.90777852970311	0.00328473683202565	0.0220398039955907	-1.91164763670155
LOC729887	9	66	0	A_32_P101699	XR_243500	LOC729887	-1.17300927487508	10.0776072135833	-6.1538942322135	0.000139482312430058	0.00356285366541603	1.33432578475388
VSIG8	346	34	0	A_33_P3393684	NM_001013661	VSIG8	-1.17594280429928	6.79932606421541	-4.29501773411087	0.00181047750871272	0.0153639765001974	-1.30106827926059
XLOC_l2_004986	81	86	0	A_21_P0011380	lnc-STOML1-1:11	XLOC_l2_004986	-1.1766538344421	9.79813210596413	-7.63195817930503	2.51090880117563e-05	0.00158937526028201	3.0785724211837
IFT122	315	62	0	A_23_P212447	NM_018262	IFT122	-1.17713810170243	9.9097722687363	-5.93768164455274	0.000183344093240131	0.00400913755115538	1.05398676493094
C9orf140	228	28	0	A_24_P100517	NM_178448	C9orf140	-1.17780216863563	12.0950512957332	-8.23991643554373	1.33028343353456e-05	0.00129234804723312	3.71623721713371
LOC100131316	295	95	0	A_21_P0011857	NR_110200	LOC100131316	-1.17817879759645	7.31855527775728	-4.01566395925612	0.0027767360444455	0.0198377828502517	-1.73969899488249
G6PD	201	115	0	A_23_P34093	NM_000402	G6PD	-1.17897590506276	7.90646857510965	-4.44859167163806	0.00143781932440995	0.0134055994089059	-1.06428617421051
PIM2	54	153	0	A_24_P379104	NM_006875	PIM2	-1.19001456291825	9.25531166112411	-3.94514971601866	0.00309848604240115	0.0211985720337373	-1.85193322792229
RALGDS	224	61	0	A_23_P135184	NM_001042368	RALGDS	-1.19145572828155	9.53360063471787	-7.75136568524705	2.20981897261357e-05	0.00158791374208275	3.20723856019646
KIF4A	210	135	0	A_33_P3253596	NM_012310	KIF4A	-1.19383043507241	9.92428163270797	-4.75800186982548	0.000913088113832074	0.0101751738190164	-0.597241124506781
LFNG	1	155	0	A_23_P434518	NM_001040168	LFNG	-1.19500977069033	8.43810327472584	-5.32575508377361	0.000411418652135917	0.00635857932406172	0.223333617079825
ARSI	146	105	0	A_23_P19030	NM_001012301	ARSI	-1.19559102590154	11.4741474240128	-5.36108532064916	0.000392104080254078	0.00617148738713052	0.272808039091903
LOC400099	349	97	0	A_32_P192594	ENST00000620617	LOC400099	-1.19599291833066	8.79220938131476	-5.66036440774599	0.000262761332291435	0.00488532649335741	0.684425573485512
GPR162	216	154	0	A_33_P3243439	NM_019858	GPR162	-1.19970768651226	7.31382758762412	-4.67341266151114	0.00103234926199639	0.0109128177475706	-0.723565972695692
CD24	172	78	0	A_33_P3369844	NM_013230	CD24	-1.20116497672219	12.754807859276	-8.54114070168046	9.84137982250272e-06	0.0011721417417096	4.01666638989612
LOC100507575	144	27	0	A_21_P0014592	XR_424161	LOC100507575	-1.20263314176717	6.56878297484359	-4.78493401101754	0.000878279150051731	0.00991762554088266	-0.557239086406543
CDCA8	263	90	0	A_23_P375	NM_018101	CDCA8	-1.20384958471312	12.9624904905732	-6.59930776158582	8.09388863395403e-05	0.00266021318519765	1.89085447045229
PLXNB3	241	76	0	A_33_P3413038	NM_001163257	PLXNB3	-1.20526805208449	9.20742658526659	-6.73292632936879	6.90792630967067e-05	0.00247744724924525	2.05243330357053
PIN1P1	318	157	0	A_23_P266	NR_023916	PIN1P1	-1.20586377951202	9.27963172544525	-3.82515903757606	0.00373961197276401	0.0238327136074106	-2.04421308164011
CCDC74B	17	132	0	A_23_P381102	NM_207310	CCDC74B	-1.20828708540016	8.84354216576619	-6.57560897021923	8.32646117520379e-05	0.00271087735966471	1.86194144408728
GPR146	48	33	0	A_23_P20035	ENST00000397095	GPR146	-1.21081708008108	7.60038448207973	-9.0805483061034	5.8557796545747e-06	0.000921154724276068	4.53061427504029
SNRNP70	201	155	0	A_23_P4909	NM_003089	SNRNP70	-1.21275533099429	10.0828179612688	-6.03623997078619	0.000161734984505239	0.00383529169226751	1.18261579809534
FAM100B	262	46	0	A_24_P194714	NM_182565	FAM100B	-1.22069061143057	12.8352280687301	-6.23586617021925	0.000125949060864697	0.0033802004713147	1.4388500303044
OIP5	120	7	0	A_23_P379614	NM_007280	OIP5	-1.22093075121101	10.7020671896765	-8.40485979868451	1.1267183648592e-05	0.00122912669752477	3.88197412713822
XLOC_000063	266	137	0	A_21_P0000951	ENST00000452795	XLOC_000063	-1.2237065903087	8.00101774352656	-7.05966388708031	4.73145302101838e-05	0.00211552971155439	2.43743130031439
HSPA2	287	61	0	A_23_P88303	NM_021979	HSPA2	-1.22379175321657	9.11226123584678	-8.30097415328399	1.25058514451327e-05	0.00127367287025813	3.77793929569636
PDK3	30	98	0	A_23_P250478	NM_005391	PDK3	-1.2256131390565	8.36622780111693	-11.7938359990659	6.00982453233474e-07	0.000413108968314599	6.71686930228485
MALAT1	22	11	0	A_21_P0010981	NR_002819	MALAT1	-1.22740989428721	11.3438962830715	-4.83906104436767	0.000812541525231087	0.0094923968771114	-0.47716546418818
BUB1B	282	111	0	A_23_P163481	NM_001211	BUB1B	-1.23162756559486	11.6665794038395	-4.77226401780902	0.000894474570300195	0.0100505035169233	-0.576044521489229
HCG4	201	86	0	A_23_P254768	NR_002139	HCG4	-1.233585507862	8.13094598641461	-7.20747861595682	4.00323300223021e-05	0.00194947490847242	2.60699793766695
ANGPTL4	365	49	0	A_33_P3295358	NM_139314	ANGPTL4	-1.23517428065707	13.2911150695564	-3.2614677644318	0.00925846848026088	0.0428983806399489	-2.96525312695739
PVRL2	24	110	0	A_23_P352870	NM_002856	PVRL2	-1.23602802623634	10.9551787581597	-10.5313179479397	1.62807504172227e-06	0.0005222848892011	5.77504917295359
CABYR	143	34	0	A_23_P314712	NM_012189	CABYR	-1.23778067722772	8.06619037075173	-10.8759474616178	1.22809484848948e-06	0.000500306947507714	6.0441313556282
SPC25	352	128	0	A_23_P51085	NM_020675	SPC25	-1.23822966222981	11.5806500823023	-4.25499016266996	0.00192361652002343	0.015953408402131	-1.3633039986262
CEP55	22	68	0	A_23_P115872	NM_018131	CEP55	-1.23962968031429	11.5429986976644	-7.78371553717061	2.13520016371843e-05	0.00156332074659716	3.24180271818337
FZD2	255	75	0	A_23_P141362	NM_001466	FZD2	-1.24033630725717	10.043308446134	-10.8954209915593	1.20896501076937e-06	0.000500306947507714	6.05905640181249
LCE1D	148	162	0	A_23_P375524	NM_178352	LCE1D	-1.24519463840778	13.9634581907059	-3.26526409109663	0.00920108159284451	0.0427864015651116	-2.95897776771787
MARCKS	129	33	0	A_23_P214222	ENST00000612661	MARCKS	-1.24523194731934	12.7290470218903	-8.66076331773765	8.75162235314146e-06	0.00110353790433898	4.13325308466318
LOC100130111	357	66	0	A_21_P0011305	lnc-GOLGA8J-3:3	LOC100130111	-1.24526210750952	9.51185288735532	-6.95221414251269	5.35108010530172e-05	0.00222694252361136	2.31238476414073
LOC728743	63	124	0	A_33_P3323188	NR_027237	LOC728743	-1.24878161179888	8.63627829914551	-9.79565068601653	3.0545503973841e-06	0.000664804064570391	5.16769751124139
LIN7B	10	11	0	A_23_P164912	NM_022165	LIN7B	-1.25130839868553	10.15080901152	-10.4866588569016	1.68963413979264e-06	0.000523926802848925	5.73948158962453
B3GNT1	157	14	0	A_23_P86900	NM_006876	B3GNT1	-1.25135455277225	10.5997910011667	-5.44062212495764	0.000352103180960502	0.00580915403852592	0.383503712642471
ANK3	282	101	0	A_23_P202269	NM_020987	ANK3	-1.25212536838653	8.28810248723338	-8.03105126196702	1.64782710826335e-05	0.00140293254588244	3.50199783795617
MAN1C1	209	70	0	A_24_P237778	NM_020379	MAN1C1	-1.25272141844511	8.365362159567	-5.54835709315544	0.000304779924105264	0.00535657459533676	0.531937813241616
ARHGAP11B	249	58	0	A_33_P3339375	NM_001039841	ARHGAP11B	-1.25355342385584	9.07713331286742	-5.07514598636957	0.000581605191457412	0.00783228081705416	-0.132963019737696
IQCD	249	101	0	A_24_P390060	NM_138451	IQCD	-1.25542674027871	8.16260628921677	-4.93806195351677	0.000705543593677749	0.00878570516513799	-0.33182136881523
ANK1	304	89	0	A_23_P216108	NM_000037	ANK1	-1.25620312119782	8.41086132631221	-3.50223928025707	0.00625884040838369	0.0335947487866217	-2.56883142594097
LOC100506295	159	74	0	A_21_P0014350	ENST00000577279	LOC100506295	-1.25747266389968	8.66681094634222	-4.21115999792151	0.00205615895432541	0.016591056803498	-1.43169328618656
PCDHB9	378	63	0	A_23_P18798	NM_019119	PCDHB9	-1.25749787388415	9.18384729946862	-10.6343422723902	1.49524988051355e-06	0.000510729406027726	5.85648242104687
LOC100507520	6	90	0	A_21_P0014358	ENST00000571724	LOC100507520	-1.25864474187853	6.48583644101701	-5.67285496437996	0.000258478116796514	0.00484710586498235	0.701314872721179
TMEM143	80	95	0	A_24_P412976	ENST00000377431	TMEM143	-1.25903813227031	9.10443055140946	-10.4689380765344	1.71476546753173e-06	0.000523926802848925	5.72532310715034
KCTD11	230	83	0	A_23_P354027	NM_001002914	KCTD11	-1.26021727902113	8.90167349337672	-3.29674019155422	0.00873921836979275	0.0413986518339449	-2.90697294307336
CLPTM1	209	32	0	A_23_P50241	NM_001294	CLPTM1	-1.26029949210826	8.66891114427663	-3.48781759453432	0.006406276806368	0.0340609475413878	-2.59247024751712
LOC644656	215	88	0	A_33_P3668839	NR_036539	LOC644656	-1.26653903842927	8.77883759523373	-5.55271768370709	0.000303014953063005	0.00535067503130399	0.537909267755624
TRIB2	267	38	0	A_24_P396753	NM_021643	TRIB2	-1.27822320501784	7.64331710552217	-6.13411971381463	0.000142977779826492	0.00358410178528065	1.30896678569955
TRIM7	73	43	0	A_23_P30315	NM_033342	TRIM7	-1.28313871961132	6.6200079155401	-6.19575127547458	0.000132384976513719	0.00346062883110714	1.38781865292904
C5orf39	314	75	0	A_33_P3299279	NM_001014279	C5orf39	-1.28316124379826	10.3086993027386	-9.27173220376675	4.90085842191531e-06	0.000836920715282438	4.70571579105557
XLOC_l2_002469	234	68	0	A_21_P0010998	ENST00000527511	XLOC_l2_002469	-1.28508554383029	7.78690008912177	-10.4180719029098	1.78921202351315e-06	0.000531242848999049	5.68453878355996
TNFAIP2	376	140	0	A_23_P421423	NM_006291	TNFAIP2	-1.28541135871702	13.385818129352	-5.65352603732226	0.00026513872822747	0.00490117562225627	0.675169166213728
HSD17B11	132	7	0	A_23_P408271	NM_016245	HSD17B11	-1.2863189239155	9.48950366349041	-11.111340595792	1.01745528488455e-06	0.000461866559035591	6.2225900241131
BHLHE41	225	112	0	A_23_P139500	NM_030762	BHLHE41	-1.28929513704764	12.5993444109656	-5.68882104684844	0.000253112513433038	0.00479314852613124	0.722869993951982
CENPE	49	103	0	A_23_P253524	NM_001813	CENPE	-1.2928271223834	11.1657115698685	-6.79300562343	6.43746359559245e-05	0.00242146640626144	2.12429429969603
PHF21A	367	157	0	A_33_P3346473	NM_001101802	PHF21A	-1.29950065545985	8.09624034425208	-4.05874103576373	0.00259770147538047	0.0191034962223625	-1.67142510310851
HIST1H2AB	366	140	0	A_24_P223384	NM_003513	HIST1H2AB	-1.30144542821083	8.35941427409393	-3.32063312897438	0.00840468981894212	0.0404344043685147	-2.86752920440805
DGKA	291	54	0	A_23_P105307	NM_201444	DGKA	-1.30297389673814	8.21158791698827	-11.9122766734823	5.50014475821748e-07	0.000413108968314599	6.79929855349845
ARHGAP44	129	2	0	A_23_P26854	NM_014859	ARHGAP44	-1.3049006287998	7.20140605791326	-7.41074500625438	3.194023681355e-05	0.00179952653366554	2.83561911009735
ACSF2	56	36	0	A_23_P4190	NM_025149	ACSF2	-1.30503234709346	8.78205539659269	-9.83529603908656	2.94975205767893e-06	0.000660079728062012	5.20162724842
XLOC_000691	135	10	0	A_21_P0001096	lnc-DNAJC11-1:1	XLOC_000691	-1.30775022097964	7.28789989579178	-8.226737953523	1.34820403445068e-05	0.00129234804723312	3.70286513977017
PDGFRB	105	29	0	A_23_P421401	NM_002609	PDGFRB	-1.30891743139611	9.2402670335206	-5.32079880135881	0.000414209092359564	0.00638927578583374	0.216378191110737
CDH18	358	123	0	A_23_P84118	NM_004934	CDH18	-1.30995559351001	8.59667060776477	-8.40375560253771	1.1279621419357e-05	0.00122912669752477	3.88087457154738
IDH2	33	156	0	A_23_P129209	NM_002168	IDH2	-1.31380366645477	10.986423297754	-7.13692728711418	4.33431015625003e-05	0.00201333472914688	2.5264165812077
KAZALD1	136	49	0	A_23_P421011	NM_030929	KAZALD1	-1.32055519296363	10.1527817776525	-7.10561180107277	4.49072188907777e-05	0.00205688107966862	2.49044344153927
FAM110A	289	144	0	A_23_P386241	NM_001042353	FAM110A	-1.32163102271024	10.6460449168584	-6.8276975005496	6.18175556311347e-05	0.00236664415389751	2.16556800048276
FAM46A	44	137	0	A_33_P3410599	NM_017633	FAM46A	-1.32803362130639	10.5081811892782	-6.35712840546884	0.000108471426595366	0.00315639931455526	1.59172110510204
EGLN1	229	16	0	A_23_P343935	NM_022051	EGLN1	-1.33124393191962	11.6292490911376	-6.889095396401	5.75586206483574e-05	0.00229195830792256	2.2382196212617
NCAPD2	93	96	0	A_33_P3303385	NM_014865	NCAPD2	-1.33534852370877	13.0217712405227	-4.88849341342147	0.0007570942071533	0.0091042735119739	-0.404412733190918
LPIN3	346	80	0	A_33_P3393341	NM_001301860	LPIN3	-1.3362169149672	7.19775381785259	-6.80068411340969	6.37989122430486e-05	0.00241753443926038	2.13344349899167
RAB20	225	90	0	A_24_P22050	NM_017817	RAB20	-1.33743377740153	7.42028914243441	-5.06183459296067	0.000592547675371632	0.00790703466432557	-0.152150444658163
ANKRD37	264	7	0	A_24_P237586	NM_181726	ANKRD37	-1.3401410786329	9.40127953862776	-5.20007173903419	0.000488872962060243	0.00708394054611906	0.0458202362035323
RNF145	307	121	0	A_24_P144773	NM_144726	RNF145	-1.34628146720278	8.92974682202886	-5.36459702651546	0.000390238302436927	0.00615089895745823	0.277715427934291
JAM2	61	61	0	A_32_P310335	NM_021219	JAM2	-1.35299136550777	8.80987464295694	-3.24986624022733	0.00943614614449973	0.0434933246138125	-2.98443442848078
TENC1	312	14	0	A_23_P151297	NM_015319	TENC1	-1.35701414958866	9.41219030628921	-5.52738531260465	0.00031342464525376	0.00543895346402141	0.503179188299181
TACC3	165	13	0	A_23_P212844	NM_006342	TACC3	-1.36114690724181	10.4917670334194	-4.3010183630698	0.00179413483719197	0.015288250202675	-1.29175667373223
CDC25C	154	135	0	A_23_P70249	NM_001790	CDC25C	-1.36522043176822	9.04284326818106	-6.56519276434435	8.43097022630349e-05	0.00271712432090601	1.84920898620675
SIGLEC15	205	140	0	A_23_P50146	NM_213602	SIGLEC15	-1.36976741093439	12.120646354738	-4.88956846723936	0.000755934316471825	0.0091042735119739	-0.402834506695834
PALMD	192	40	0	A_23_P23669	NM_017734	PALMD	-1.37042461614375	10.1352315555742	-12.4227142301952	3.78707624316236e-07	0.000376361472184622	7.14383576942826
TROAP	78	115	0	A_23_P150935	NM_005480	TROAP	-1.37074721314407	10.8992960981709	-7.3686211215142	3.34579445321979e-05	0.00185408070716468	2.78866872390517
LRRC20	298	161	0	A_23_P61487	NM_018205	LRRC20	-1.37109199268317	10.5591593411734	-5.47110609159258	0.000337957269344458	0.00564612523169794	0.425679327138917
TSPAN4	219	151	0	A_23_P316741	NM_001025237	TSPAN4	-1.3735783703493	11.803149964645	-4.59176056195971	0.00116336372839684	0.0116762621078768	-0.84648252562625
FAM70A	56	98	0	A_23_P125680	NM_017938	FAM70A	-1.37464187757794	7.05634714728981	-4.5466556150878	0.00124324934132079	0.0122156744186177	-0.91478973658304
CAPN5	8	124	0	A_33_P3393170	NM_004055	CAPN5	-1.37477957427663	11.5045342684002	-5.17354493488439	0.000507144939089247	0.00722257898635323	0.00805222433164143
ANG	154	107	0	A_33_P3236177	NM_001145	ANG	-1.37522464791777	9.18195028735246	-6.34568933860629	0.000110002050531372	0.00316341926485915	1.57738911500147
RAB26	163	108	0	A_33_P3209229	NM_014353	RAB26	-1.37606298758264	7.71969720649182	-6.97460037061939	5.2150465865749e-05	0.0021919751367064	2.33856221564303
STARD8	325	76	0	A_23_P387630	NM_014725	STARD8	-1.37892451488083	8.94210678524076	-7.68049909119155	2.38342601908147e-05	0.00158937526028201	3.13108407695106
PPFIA4	201	82	0	A_23_P420692	ENST00000295706	PPFIA4	-1.3813023713216	7.14388259988686	-6.05014337902619	0.000158915436560713	0.00380679792972076	1.20064773567618
CDK19	166	134	0	A_33_P3328026	NM_015076	CDK19	-1.38200222917324	11.975092297122	-7.69879955690102	2.33721175612417e-05	0.00158937526028201	3.15080778787775
SOCS2	135	72	0	A_23_P128215	NM_003877	SOCS2	-1.38286232259309	8.48920921416782	-3.40421787558804	0.00733521701065162	0.037091638403957	-2.72979046168945
PDLIM2	255	17	0	A_33_P3311371	NM_198042	PDLIM2	-1.39202311819009	11.0834298496877	-6.55599347672689	8.52445488843281e-05	0.00272266737315672	1.83795160945472
LOC100507347	152	34	0	A_21_P0014248	NR_108061	LOC100507347	-1.39267604353659	9.83671210390857	-11.5868996197509	7.02965998001792e-07	0.000413108968314599	6.57052387268332
PFKL	191	60	0	A_23_P29079	NM_001002021	PFKL	-1.40459514486657	10.8162483305028	-8.90881181269738	6.88924835894875e-06	0.000975633301581927	4.37022829159844
NFIX	10	40	0	A_33_P3884230	NM_002501	NFIX	-1.40463064075973	7.5624068608241	-4.10768576864808	0.00240898417253755	0.0182256859682269	-1.59412545954658
H1F0	251	129	0	A_23_P29257	NM_005318	H1F0	-1.40598394821545	7.05938870354764	-3.27596270439114	0.00904132740967277	0.0423492364047408	-2.94129634530298
FPR1	239	45	0	A_23_P38795	NM_002029	FPR1	-1.40749610907997	12.5144517032516	-5.43588216727883	0.000354359464043633	0.00582219562019156	0.376933350532191
CA9	83	136	0	A_23_P157793	NM_001216	CA9	-1.41076810682943	12.4690288257621	-7.12585051712924	4.38894661255797e-05	0.00202120532696582	2.51370682757464
ACTA2	151	21	0	A_23_P150053	NM_001613	ACTA2	-1.41081835628616	9.76476643035993	-12.0725623988138	4.8845646451447e-07	0.000408452437273995	6.90933796876648
DBP	296	87	0	A_23_P130753	NM_001352	DBP	-1.41173023529543	8.26165776743975	-3.45618193355993	0.00674250877632143	0.0351575252504742	-2.64437794267766
H1FX-AS1	230	102	0	A_33_P3368771	NR_026991	H1FX-AS1	-1.41280301918008	7.16772639760744	-5.12299025759971	0.00054403170565913	0.0075558816788549	-0.0642170233855461
LXN	128	143	0	A_33_P3234697	NM_020169	LXN	-1.42127737732264	8.80490470428388	-14.3731214465265	1.02274375566035e-07	0.000180548364332574	8.31642834165133
GRK6	97	12	0	A_23_P257256	NM_002082	GRK6	-1.42342790171719	9.30289450363854	-11.4128881943709	8.03545291656232e-07	0.000413108968314599	6.44512145240362
RAB15	50	143	0	A_24_P193295	NM_198686	RAB15	-1.42389746743259	7.95751968345532	-4.96063893553972	0.000683322493088642	0.00860854068637141	-0.298878621472863
UCN2	350	127	0	A_33_P3279629	NM_033199	UCN2	-1.42798926172543	11.0894610922047	-9.21256083592643	5.17678196960895e-06	0.000856757415970281	4.65190449412734
ARL6IP1	65	97	0	A_23_P118150	NM_015161	ARL6IP1	-1.43611234319038	10.9229349927765	-12.1492039095929	4.61734725262035e-07	0.000407557850831289	6.96134867506501
PRC1	300	149	0	A_23_P206059	NM_003981	PRC1	-1.44165787164356	13.2521795589379	-5.93957574800498	0.000182900522749663	0.00400817035234019	1.05647209448581
SPAG5	6	128	0	A_23_P89509	NM_006461	SPAG5	-1.445856320037	12.8804329093795	-4.8021153570208	0.00085681632886163	0.00978655487631458	-0.531775139397011
BIRC5	21	59	0	A_23_P118815	NM_001012271	BIRC5	-1.44589317494651	14.4768156693184	-6.6463935820597	7.65246813984013e-05	0.00260347781168694	1.94807134714112
DEPDC1	194	25	0	A_23_P200310	NM_017779	DEPDC1	-1.44640950542033	11.1638502802471	-6.56517423360836	8.43115741570155e-05	0.00271712432090601	1.84918632146091
UGT1A6	55	16	0	A_24_P222872	NM_001072	UGT1A6	-1.44660467766462	10.5654307261082	-5.94357760002167	0.000181967162309889	0.00399874726802146	1.06172136505878
APOBEC3B	279	141	0	A_24_P66027	NM_004900	APOBEC3B	-1.44679970485614	9.56958056457284	-5.05024132898818	0.000602257899276206	0.00795400956251069	-0.168882811859429
CYTH4	117	101	0	A_23_P155057	NM_013385	CYTH4	-1.44878869268036	8.76939794193733	-7.53739050790663	2.78117501702652e-05	0.00168474127516769	2.975446953013
RDM1	278	55	0	A_21_P0000036	NM_145654	RDM1	-1.44907762405645	7.36325138972823	-11.5876958014832	7.02538878649937e-07	0.000413108968314599	6.57109268563516
KIF2C	273	116	0	A_23_P34788	NM_006845	KIF2C	-1.45254810115577	12.4686209113653	-6.25018910841292	0.00012373397286549	0.00334903809350409	1.4570151003155
SYNE2	113	78	0	A_33_P3210278	NM_182914	SYNE2	-1.45518330776264	8.74296133608846	-3.63720078482407	0.00503915672633742	0.0290751365416519	-2.34841734357039
C1QL1	269	138	0	A_23_P77993	ENST00000253407	C1QL1	-1.45524833361061	9.13894614224999	-3.80496821818025	0.00386055321409004	0.0243594370884125	-2.07672146757494
NEK2	302	3	0	A_23_P35219	NM_002497	NEK2	-1.46429399111404	8.57834014905165	-7.91610853972958	1.85725477930614e-05	0.00145359920855251	3.38196788954735
XLOC_014300	281	20	0	A_21_P0010370	ENST00000458154	XLOC_014300	-1.47171858334933	8.91974397784976	-7.56783596133168	2.6908516596524e-05	0.00165333448880887	3.00876669059982
HIST1H2BF	260	78	0	A_33_P3229122	NM_003522	HIST1H2BF	-1.47303240392226	8.08218601128417	-3.24686591795971	0.00948266719396078	0.0436570896486957	-2.98939592414225
FOXM1	337	8	0	A_23_P151150	NM_202002	FOXM1	-1.47975333617044	11.9616505941209	-5.90999179531269	0.000189963241749157	0.00406672280854426	1.01759400257451
SPAG4	121	64	0	A_23_P132027	NM_003116	SPAG4	-1.49357992261982	11.1327792593482	-8.53158663871781	9.93461609626656e-06	0.0011721417417096	4.00728900930209
ATOH8	247	20	0	A_23_P142878	NM_032827	ATOH8	-1.5054760025582	10.8121354347137	-7.66947724378621	2.41174012609738e-05	0.00158937526028201	3.11918559135993
XLOC_004848	118	110	0	A_21_P0004556	ENST00000602982	XLOC_004848	-1.50603814331556	7.81324621212437	-5.81675226765682	0.000214222083385223	0.00435237910591359	0.894224019501488
LOC100507165	232	39	0	A_19_P00315647	XR_110530	LOC100507165	-1.50614267504919	7.83024540132325	-3.85499117117542	0.00356815981626899	0.0231915185674099	-1.9962608707687
PLEKHG3	101	16	0	A_33_P3304212	NM_015549	PLEKHG3	-1.50781699484425	8.40680739083022	-9.52945420538045	3.87346667512809e-06	0.00076396070620673	4.93617407829668
LOC100506411	20	32	0	A_19_P00807053	ENST00000554032	LOC100506411	-1.50801273083836	8.66734065594809	-5.70611867300142	0.00024743484388631	0.00475937627078171	0.74618017361211
SNN	45	44	0	A_24_P30923	NM_003498	SNN	-1.50929875183858	8.60315832447802	-6.01220321325756	0.000166738106818683	0.00389578682519888	1.15137541469394
KIF14	334	2	0	A_33_P3230548	NM_014875	KIF14	-1.51779914204721	8.51507659139025	-7.91815660150653	1.85327820349798e-05	0.00145359920855251	3.38412001952609
TMEM107	103	159	0	A_24_P284353	NM_032354	TMEM107	-1.51979568870629	11.7783079625919	-9.86655733573732	2.86989633789456e-06	0.000653919071344036	5.22828235222047
HIST1H4A	104	6	0	A_23_P431179	NM_003538	HIST1H4A	-1.52040365029105	6.98243312619559	-3.42310003497211	0.00711381474610624	0.0364309644601373	-2.69873339235927
GALNT2	293	160	0	A_24_P353794	NM_004481	GALNT2	-1.52466807225317	9.00295735406884	-4.0640394973836	0.00257653774653488	0.0190134843088463	-1.66304293359856
BUB1	165	152	0	A_23_P124417	NM_004336	BUB1	-1.53137070022679	10.8699103501373	-8.85892660030453	7.22573486679157e-06	0.00100703925932969	4.32308036790859
SYT13	329	132	0	A_23_P161659	NM_020826	SYT13	-1.5341346459339	11.741202083397	-7.66413747112751	2.4255893311979e-05	0.00158937526028201	3.11341584412846
XLOC_002080	38	138	0	A_21_P0002435	lnc-SRBD1-1:1	XLOC_002080	-1.53639955988099	7.0551820206068	-11.7179926482753	6.36337329620123e-07	0.000413108968314599	6.66357942543271
INCENP	8	57	0	A_23_P116387	NM_001040694	INCENP	-1.53715815148669	8.42163902608138	-4.33950702945388	0.00169296702567034	0.0149101220087862	-1.23214547134841
TMSB15A	239	138	0	A_23_P137173	NM_021992	TMSB15A	-1.53761909114006	10.0947089793433	-12.8635086188299	2.77378969744638e-07	0.000331341964334521	7.42800405857435
CENPF	298	61	0	A_23_P401	NM_016343	CENPF	-1.53775645539345	10.2070689507914	-5.97855310485871	0.000174025679881419	0.00391154242896493	1.10749976135179
FOXL1	87	15	0	A_33_P3355503	NM_005250	FOXL1	-1.54133017400086	12.1612285899118	-13.1066901644312	2.34555590601755e-07	0.000310551601956724	7.57973701192984
ANXA6	200	164	0	A_23_P357104	NM_001155	ANXA6	-1.54135405132273	9.68590596179008	-5.51953997351948	0.000316726197915569	0.00545785882048	0.492404020851099
CENPW	181	26	0	A_24_P462899	NM_001012507	CENPW	-1.55405149628528	11.2185742404697	-7.02845287036536	4.90297201570011e-05	0.00212958141776251	2.40126489333004
INSIG2	189	100	0	A_24_P944458	NM_016133	INSIG2	-1.55719165798381	9.50671966115585	-10.5198488030456	1.64364579934888e-06	0.0005222848892011	5.76593040492474
XLOC_011819	60	113	0	A_21_P0009114	XR_243494	XLOC_011819	-1.56006669006511	9.18585195365683	-6.97079828048516	5.23788275514661e-05	0.00219576467582505	2.33412087964039
SNORA67	252	123	0	A_21_P0000295	NR_002912	SNORA67	-1.56012074081051	10.1907065996246	-3.21598362383029	0.00997550609101471	0.0451367345227607	-3.04048565273156
SOST	21	122	0	A_23_P118571	NM_025237	SOST	-1.5731306383852	6.77509651987439	-4.09934513535294	0.00244008923452613	0.0183735250038631	-1.60727716076981
C4orf49	250	1	0	A_23_P255331	NM_032623	C4orf49	-1.58398646656421	9.11659709181125	-10.7627586700045	1.34608555649635e-06	0.000509204936228904	5.9567943207057
C11orf35	169	163	0	A_33_P3377005	NM_173573	C11orf35	-1.58492721750442	7.96552916166676	-6.41142959410536	0.000101514060264364	0.00300905856246308	1.65950393406179
XLOC_014063	330	94	0	A_21_P0010321	ENST00000607953	XLOC_014063	-1.58773228483639	7.6063860888374	-10.6217368309228	1.5108435349511e-06	0.000510729406027726	5.8465647351979
ID2	210	11	0	A_23_P143143	NM_002166	ID2	-1.59109137066805	11.3852566044826	-8.57450136797499	9.52325191632015e-06	0.00116843522224832	4.04933349659293
NUSAP1	315	82	0	A_33_P3350488	NM_016359	NUSAP1	-1.5989817519759	12.2677093958899	-6.59824153953661	8.10419922691258e-05	0.00266021318519765	1.8895553165697
CDC20	302	98	0	A_23_P149200	NM_001255	CDC20	-1.60408715842811	11.4756986582213	-9.43888926630928	4.20475540086649e-06	0.000776804114057754	4.85590839702269
IQGAP3	91	9	0	A_33_P3321293	NM_178229	IQGAP3	-1.60562424988803	11.7421145065323	-4.57229503998494	0.00119714646874908	0.0118876644346784	-0.875925848513868
CASC5	129	100	0	A_23_P100127	NM_170589	CASC5	-1.61719714298148	10.1083348791304	-4.64149790218709	0.00108157911959968	0.0111567956408023	-0.771495729044039
PSRC1	106	113	0	A_23_P46539	NM_032636	PSRC1	-1.62540197348189	10.2740251748725	-13.9748876799341	1.31789276697724e-07	0.000209386802817343	8.09401920160865
ADAMTS4	260	118	0	A_23_P360754	NM_005099	ADAMTS4	-1.62759886942686	8.44603154363515	-4.72873527718199	0.000952593580051947	0.0104594380095821	-0.6408302538764
CREB3L3	267	60	0	A_23_P108082	NM_032607	CREB3L3	-1.63568665751326	7.65535819537716	-8.05500449047432	1.60751711539205e-05	0.00139778982486948	3.52681924180202
CRIP2	277	75	0	A_23_P112798	NM_001312	CRIP2	-1.63946937335016	9.6893956785925	-7.48287231879327	2.95129085877397e-05	0.00172867436155789	2.91549726577056
NR2F1	217	85	0	A_33_P3403117	NM_005654	NR2F1	-1.64741598614141	9.77075022820358	-11.6059739156026	6.92811461412438e-07	0.000413108968314599	6.58413872487435
ZNF395	107	98	0	A_23_P146077	NM_018660	ZNF395	-1.64767590187925	13.1128409349952	-8.901272487315	6.93898307393994e-06	0.000975633301581927	4.36311896092602
UCA1	147	94	0	A_32_P200238	NR_015379	UCA1	-1.65294152677108	7.48037014369213	-3.86534836727602	0.00351058550837039	0.0230289771085833	-1.97963512485019
SPC24	39	65	0	A_24_P314571	ENST00000592540	SPC24	-1.65847790017172	8.78371907374432	-7.09044786673117	4.5686611904294e-05	0.00208142175100246	2.47297847214013
MKI67	49	3	0	A_24_P346855	NM_002417	MKI67	-1.65959513153432	9.73804985058783	-4.32879996399554	0.00172048749162951	0.0150488917489716	-1.24870862118279
RNF122	315	103	0	A_23_P134744	NM_024787	RNF122	-1.66278188519992	8.62709465928359	-5.84452453045625	0.000206663717928222	0.00426425084473194	0.931104269259929
PHLDA1	6	14	0	A_24_P915692	NM_007350	PHLDA1	-1.66600503899505	9.79913643601398	-5.42246288295323	0.000360832123698215	0.00588958122738567	0.358313808527951
TMEFF2	352	122	0	A_23_P125383	NM_016192	TMEFF2	-1.66897255606836	6.7272797880543	-3.34301011015297	0.00810341128071403	0.0394687303580578	-2.83061516738305
HILPDA	13	38	0	A_23_P20022	NM_013332	HILPDA	-1.68213879906415	12.48182612595	-5.15945208669613	0.000517149632908446	0.00729409202138494	-0.0120554972421196
LOC338799	84	10	0	A_23_P116743	NR_002809	LOC338799	-1.69517300028895	10.7755672724839	-9.51862028765438	3.91154728054442e-06	0.00076396070620673	4.92661275797009
CDON	268	85	0	A_32_P172141	NM_016952	CDON	-1.69594066945386	7.94623440614814	-6.14494051980744	0.000141053420046707	0.00356856168423899	1.32285042867087
CCNB2	210	146	0	A_23_P65757	NM_004701	CCNB2	-1.70163316691265	13.0029538509357	-9.86212874544924	2.88106338079573e-06	0.000653919071344036	5.22451159899111
CENPA	117	62	0	A_24_P413884	NM_001809	CENPA	-1.70709160962654	9.38684108387886	-5.85295816772548	0.000204425911194555	0.00424564559092691	0.942281318072204
SMAD6	129	17	0	A_33_P3220470	NM_005585	SMAD6	-1.70894800357013	9.54781185070227	-9.00557057814197	6.28445575319312e-06	0.000933153579502172	4.46095684166374
FAM57B	290	14	0	A_23_P163711	NM_031478	FAM57B	-1.7285239500475	7.60737791060285	-3.62466155994293	0.00514121229939485	0.0294763704829671	-2.36883102953742
C1QTNF6	259	22	0	A_24_P211565	NM_031910	C1QTNF6	-1.74541754036318	8.6009222186091	-11.5299895757378	7.34248455931196e-07	0.000413108968314599	6.52974940970937
ASAP3	5	90	0	A_23_P114689	NM_017707	ASAP3	-1.74960815764816	7.94769393037285	-5.44859603201553	0.000348342342878366	0.00576593714852421	0.3945492894605
PTTG1	29	162	0	A_23_P7636	NM_004219	PTTG1	-1.75120967585895	14.6024718788692	-15.7572924969423	4.44423324445112e-08	0.000141219955575679	9.03002220819618
LOC645722	55	21	0	A_24_P896205	NR_125749	LOC645722	-1.77577888795936	10.9834971408906	-11.4088804381149	8.06040912497016e-07	0.000413108968314599	6.44220761015232
FAM83D	107	21	0	A_23_P323751	NM_030919	FAM83D	-1.77922424661514	10.677530654957	-9.0228229411705	6.18285685771738e-06	0.000933153579502172	4.47703482256437
PRR7	31	132	0	A_23_P30464	NM_030567	PRR7	-1.78620301284218	10.5916373049254	-4.17156989382294	0.00218421527678975	0.0172136965861288	-1.49368044659961
AURKA	238	119	0	A_23_P131866	NM_198433	AURKA	-1.79417334917766	11.9034973275481	-11.1531568787516	9.84366074350043e-07	0.000459988476155102	6.25385185523914
KCNMB4	98	108	0	A_23_P64792	NM_014505	KCNMB4	-1.826240906978	8.43191951618828	-5.05540651107979	0.00059791074394216	0.00793093326145958	-0.161425517365147
GTSE1	254	72	0	A_23_P57588	NM_016426	GTSE1	-1.83051580930976	10.4679361052824	-7.33190801818395	3.48449424499122e-05	0.00187666591743798	2.74756758798338
C18orf56	339	144	0	A_24_P238499	NM_001012716	C18orf56	-1.83134230860349	8.21568728529142	-9.73985371333742	3.20902694332322e-06	0.000688986757777288	5.11970476463447
BCORL1	99	67	0	A_23_P147495	NM_021946	BCORL1	-1.83872211689397	8.71538189634447	-12.3750468429142	3.91908655859821e-07	0.000376361472184622	7.11237850498502
GAS2L3	92	138	0	A_32_P189204	NM_174942	GAS2L3	-1.84095193366165	6.88962476837134	-5.49267521085795	0.00032831877860875	0.00553750398570682	0.455437138872784
HMMR	116	43	0	A_23_P70007	NM_012484	HMMR	-1.84221067207208	11.9361997043889	-10.0921814832135	2.35923246880001e-06	0.000601607629328004	5.41810062919181
PFKFB4	250	57	0	A_24_P362904	NM_004567	PFKFB4	-1.88053133392227	12.4809245618451	-5.4443148453286	0.000350356124294129	0.00579236014857974	0.388620105518886
SEMA4B	197	99	0	A_23_P95165	NM_020210	SEMA4B	-1.88106720370651	8.32767980426166	-9.01525835275852	6.22718139584797e-06	0.000933153579502172	4.46998883863266
CALHM3	345	81	0	A_33_P3241204	NM_001129742	CALHM3	-1.88367139106367	7.16407229538997	-5.55919937708454	0.000300411794833468	0.00532694486195774	0.546780157851315
KCTD4	375	158	0	A_23_P48327	NM_198404	KCTD4	-1.88447959591721	8.78184552154296	-8.23348911625225	1.33899079881399e-05	0.00129234804723312	3.70971790439974
PIF1	382	12	0	A_23_P416468	NM_025049	PIF1	-1.8873058752335	10.1930565674248	-14.9035420311748	7.36866098814238e-08	0.00017135047783007	8.60040151183651
DLX4	238	116	0	A_23_P164196	NM_138281	DLX4	-1.8915425498359	6.35715775251073	-9.39586863192243	4.37290739262687e-06	0.000792956106632631	4.81750892664395
XLOC_l2_002351	284	56	0	A_21_P0010979	ENST00000619960	XLOC_l2_002351	-1.9020529699857	10.3716121978146	-6.05047259637987	0.000158849321115692	0.00380679792972076	1.20107437295253
PRRT2	266	25	0	A_23_P66017	NM_145239	PRRT2	-1.91266933113049	8.33222983698188	-5.94815528817377	0.00018090581259042	0.0039968033950299	1.06772310201014
ASPM	114	52	0	A_23_P52017	NM_018136	ASPM	-1.92079296859763	10.8319345351899	-10.8848667948966	1.21929196722112e-06	0.000500306947507714	6.05097103067399
NFATC4	288	42	0	A_33_P3250083	NM_001136022	NFATC4	-1.925560530592	7.23570744256171	-8.11531453696699	1.5107153783981e-05	0.00137081554699583	3.58902460955993
FAM64A	338	100	0	A_33_P3276918	NM_001195228	FAM64A	-1.93531155662401	9.40390207742028	-8.11029320631838	1.51852678921995e-05	0.00137081554699583	3.58386129509572
XLOC_006892	108	45	0	A_21_P0005747	ENST00000523572	XLOC_006892	-1.9418762277877	7.25892379361087	-10.6484459365952	1.47801206543179e-06	0.000510729406027726	5.86756375268132
KIFC1	101	37	0	A_23_P133956	NM_002263	KIFC1	-1.94988846867839	7.84428225445426	-4.10301200703743	0.00242636220595658	0.0183299767889977	-1.60149409068898
ARTN	80	11	0	A_33_P3214586	NM_057090	ARTN	-1.97826218251109	8.35324064648022	-10.7738626760939	1.33397668011201e-06	0.000509204936228904	5.96540670913575
NMU	204	149	0	A_23_P69537	NM_006681	NMU	-1.99417830785723	9.90357326105303	-13.1701667960511	2.24614168733102e-07	0.000310551601956724	7.61877153710527
BDKRB1	322	88	0	A_23_P128744	NM_000710	BDKRB1	-2.00568155584252	8.79993430814116	-4.11784833551026	0.00237165045706416	0.0180118463010685	-1.57811257978769
VPS37D	279	114	0	A_33_P3293573	NM_001077621	VPS37D	-2.00631736847521	10.0930269028455	-7.2450889688039	3.83807951274762e-05	0.00189992928827684	2.64969447988966
PTTG3P	90	152	0	A_23_P60016	NR_002734	PTTG3P	-2.00850246046845	8.33512886568418	-8.98084752039551	6.43325132798573e-06	0.000946402750917012	4.43786455113638
ZP1	299	158	0	A_23_P1912	NM_207341	ZP1	-2.01574059112658	10.0556881922328	-6.76984999218211	6.61452933231034e-05	0.00242146640626144	2.09665547610904
PGF	348	37	0	A_33_P3276693	NM_002632	PGF	-2.02150589692608	8.70351142540276	-7.63310313530806	2.50781751879984e-05	0.00158937526028201	3.07981431900278
HMGB3P1	55	152	0	A_23_P373119	NR_002165	HMGB3P1	-2.04762299389347	8.64371331238364	-7.36940364308317	3.34290442346643e-05	0.00185408070716468	2.78954293112385
PTTG2	87	56	0	A_23_P18579	NM_006607	PTTG2	-2.05363402357027	13.290577920157	-16.2048713518719	3.44406292198432e-08	0.000141219955575679	9.24263265105145
LOC100507193	120	89	0	A_21_P0014489	lnc-MAT2B-3:8	LOC100507193	-2.05839783340125	7.10247907356698	-8.10089722281196	1.53326245266145e-05	0.00137369210238098	3.57419192725072
LOC100293962	132	33	0	A_21_P0014573	XR_111287	LOC100293962	-2.09334756702805	7.39536969915992	-11.6010024909271	6.95442453893649e-07	0.000413108968314599	6.58059269736948
DLGAP5	15	137	0	A_23_P88331	NM_014750	DLGAP5	-2.1166073874714	11.1526304691251	-10.6269052543895	1.50442839825212e-06	0.000510729406027726	5.8506326824664
CCNB1	53	52	0	A_23_P122197	NM_031966	CCNB1	-2.12969403450037	12.6328328091271	-17.9288547792678	1.36722866187356e-08	0.000108612644899236	9.98899603322248
PRR11	188	65	0	A_33_P3403075	NM_018304	PRR11	-2.15627073761572	9.59966089767881	-8.2284523197126	1.34585791149467e-05	0.00129234804723312	3.70460578931854
RMRP	240	106	0	A_33_P3401284	NR_003051	RMRP	-2.18673296016415	8.79607771782925	-3.80876791170222	0.00383748318906974	0.0242908099234821	-2.07060047130159
GPER	129	59	0	A_23_P8640	NM_001039966	GPER	-2.21953625912616	7.5835603884562	-6.89153837747964	5.73958986248889e-05	0.00229122119937748	2.24109998256788
XLOC_000670	29	119	0	A_19_P00809697	NR_026874	XLOC_000670	-2.22541762783759	6.8194232274	-4.0791710174923	0.00251709512968149	0.0187893593793772	-1.63912372835839
EGLN3	138	127	0	A_33_P3256952	NM_022073	EGLN3	-2.22984411750731	7.33209046358933	-7.46660982158993	3.00420869042157e-05	0.00172937926352964	2.89754355559559
CHST1	275	140	0	A_33_P3413355	NM_003654	CHST1	-2.23769045153162	6.87058104904303	-4.21089015182628	0.0020570043405264	0.016591056803498	-1.43211510743866
CDKN2D	265	158	0	A_23_P89941	NM_001800	CDKN2D	-2.25536196289661	11.215992692357	-6.21533852106416	0.000129199017223109	0.00341549748026749	1.41276487223732
PLK1	47	154	0	A_23_P118174	ENST00000562272	PLK1	-2.2579816979554	8.9464270100602	-10.2164515230584	2.12122320409802e-06	0.000571220241808632	5.52076110196488
RN5-8S1	44	39	0	A_33_P3399064	NR_003285	RN5-8S1	-2.29394123385845	15.1561874107498	-4.16591410235088	0.00220318816125049	0.0172775190058972	-1.50255223853936
B3GALT4	18	25	0	A_23_P422071	NM_003782	B3GALT4	-2.31197930798391	6.79983075775423	-6.0843769451244	0.000152197316716699	0.00372017071999218	1.24492759243525
CDKN3	43	29	0	A_23_P48669	NM_005192	CDKN3	-2.33719305858465	11.2534722036342	-12.7899911231933	2.91967994755997e-07	0.000331341964334521	7.38143823080666
RN7SK	172	46	0	A_33_P3382595	NR_001445	RN7SK	-2.35837608881564	12.7433922795925	-4.27898984771212	0.00185490904138411	0.0156426724254303	-1.3259633490392
DLX5	239	100	0	A_33_P3235147	NM_005221	DLX5	-2.36012047286571	6.96201260840284	-6.86633102672061	5.90992659978117e-05	0.00232418103508226	2.21134142247196
CDCA3	123	142	0	A_24_P218979	NM_031299	CDCA3	-2.40812956557498	11.5084993736901	-9.54046915795775	3.83516606617086e-06	0.00076396070620673	4.94588392670705
NEURL1B	296	98	0	A_32_P198731	NM_001142651	NEURL1B	-2.44067474573878	11.3358750831493	-9.3591671271546	4.52219591871454e-06	0.000798318319517073	4.7846106130618
XLOC_004165	184	23	0	A_21_P0003797	lnc-SCRG1-1:4	XLOC_004165	-2.44236751485234	7.8121762574961	-8.63542341025805	8.97094314658789e-06	0.00112148328971895	4.1086830345983
SAMD11	277	135	0	A_33_P3818959	NM_152486	SAMD11	-2.48624036513035	11.4181990242515	-5.52241916390059	0.000315510213424335	0.00544419299879279	0.49635950561365
C10orf10	233	26	0	A_24_P329795	NM_007021	C10orf10	-2.54333324994673	7.5252154888384	-4.14819328244853	0.00226377293445199	0.0175593817691914	-1.53037580014296
DLX3	261	109	0	A_24_P296587	NM_005220	DLX3	-2.55759580849845	7.05983930457138	-5.65624200392542	0.00026419173974292	0.00489771251919218	0.678846324509499
LMO2	28	56	0	A_23_P53126	NM_005574	LMO2	-2.56617521842842	8.09492676669464	-5.30945908938155	0.000420670381843376	0.00645759519490585	0.200450721594805
ZMYND10	366	61	0	A_23_P29663	NM_015896	ZMYND10	-2.57412414084175	7.91304333610759	-8.24148220024332	1.3281716145447e-05	0.00129234804723312	3.71782469331424
GPRC5C	191	146	0	A_23_P38167	NM_022036	GPRC5C	-2.57992346046035	8.92303103555153	-9.00589790860387	6.28251117630366e-06	0.000933153579502172	4.46126216856471
P2RY8	118	4	0	A_24_P340128	NM_178129	P2RY8	-2.61162456911951	7.33716196978736	-6.90889903587948	5.62538547645606e-05	0.00228511466057	2.26154596512661
ST8SIA5	327	129	0	A_23_P379789	NM_013305	ST8SIA5	-2.62149062171765	9.34353361016862	-7.35768356983932	3.38647568230857e-05	0.00186174137164424	2.77644160940983
KIF20A	15	1	0	A_23_P256956	NM_005733	KIF20A	-3.03607602656689	10.6238279844022	-21.3158291447888	2.78235245497634e-09	4.4206015804664e-05	11.1783125581627
METTL7A	355	61	0	A_23_P415021	NM_014033	METTL7A	-3.06512566231881	9.19504341471607	-14.8637190578433	7.54942941094216e-08	0.00017135047783007	8.57955094072573
HAPLN2	274	68	0	A_33_P3318946	NM_021817	HAPLN2	-3.13446165701677	8.22700826054457	-3.13626474568119	0.0113736367093699	0.0488126256181709	-3.17251928973639
XLOC_l2_015885	274	145	0	A_21_P0013877	TCONS_l2_00030893	XLOC_l2_015885	-3.41946014979425	12.9038296248268	-3.65989223595175	0.00485982586649349	0.0284702206040423	-2.31151190113425
Up-regulated genes
PLRG1	67	129	0	A_23_P84775	NM_002669	PLRG1	1.00017370347266	11.5835119510215	6.00243526938631	0.000168818907535564	0.00389885891930266	1.13865614639601
BMP2K	122	43	0	A_23_P334282	NM_017593	BMP2K	1.00067849671928	8.38176232977684	7.71995578958093	2.28500104172063e-05	0.00158937526028201	3.17355921471971
PLK3	255	140	0	A_23_P51646	NM_004073	PLK3	1.00104802769206	11.0748381666511	6.73622407031306	6.88115543133855e-05	0.00247744724924525	2.05639038954086
UNG	223	23	0	A_33_P3236157	NM_003362	UNG	1.00212604239817	14.141364764117	5.92152722938255	0.00018717484832281	0.00404857914400107	1.03276862864757
ORC6	39	163	0	A_23_P100344	NM_014321	ORC6	1.00226159074085	11.0708234544707	5.3425632440388	0.000402105131004233	0.00626337874646594	0.2468940777339
NRG1	80	94	0	A_33_P3392192	ENST00000607314	NRG1	1.00309174167447	10.4115660415313	8.01865738679156	1.66911680326806e-05	0.00140293254588244	3.48912887948344
MFHAS1	59	32	0	A_33_P3256680	NM_004225	MFHAS1	1.00324150613641	7.38207274194705	6.45343874717997	9.64639211484413e-05	0.00292484499848556	1.7116593805995
NOP14	52	35	0	A_32_P22622	NM_003703	NOP14	1.00348823214024	9.97776501091777	5.3779394172978	0.000383236137291787	0.0060767023446027	0.296343767766731
SNORD30	138	33	0	A_21_P0000255	NR_002561	SNORD30	1.00408627835835	7.44734929659199	5.70033623447513	0.000249317382448484	0.00476100309175663	0.738392721153365
NARS2	241	40	0	A_23_P24960	NM_024678	NARS2	1.00427632368742	9.16702301271872	3.68657456837842	0.00465746916911978	0.0276686815178248	-2.26817618818186
GORAB	64	144	0	A_23_P368145	NM_152281	GORAB	1.00578724407492	7.93850216620107	4.62451382579563	0.00110879439107839	0.0113319128842792	-0.7970621122659
USP36	47	163	0	A_33_P3357247	NM_025090	USP36	1.00694763654838	10.2647838846353	8.55951252379707	9.66477171363039e-06	0.0011721417417096	4.03467098581759
KARS	119	115	0	A_33_P3449417	NM_001130089	KARS	1.00812309370786	14.2317009883953	4.99094854138574	0.000654662901546587	0.00840847548890233	-0.254771763461481
SNORA33	215	99	0	A_33_P3650353	AI887274	SNORA33	1.0081485064593	8.18011950931427	4.24594090102566	0.00195021983342713	0.0160662710168986	-1.37740323946364
ORC5	58	153	0	A_24_P394698	NM_181747	ORC5	1.00935761711882	10.0643330375659	6.41152623396905	0.000101502118556438	0.00300905856246308	1.65962419829108
C6orf48	27	3	0	A_23_P122531	NM_001040437	C6orf48	1.01033858784127	14.9701897083357	5.87095777442554	0.000199736975418085	0.00417548322756016	0.96610119054754
RNF185	218	7	0	A_32_P15421	NM_152267	RNF185	1.01051782501884	8.09300269458387	5.27843609201627	0.000438907753100947	0.00663709605871998	0.156778302715671
PGM2	206	8	0	A_23_P7172	NM_018290	PGM2	1.01128822717856	9.86419226841172	3.56124778281612	0.00569146697778356	0.0314853855651202	-2.4722763747141
BOP1	51	91	0	A_23_P43800	NM_015201	BOP1	1.01214400736638	12.5395421751214	4.36486694435267	0.00162963313977414	0.0145175087027102	-1.19297697738054
TIMM44	141	90	0	A_23_P119214	NM_006351	TIMM44	1.01227724546186	11.2255423114281	7.93011837919484	1.8302378440624e-05	0.00145181832017355	3.3966798378405
CARD9	331	157	0	A_23_P500433	NM_052813	CARD9	1.01326990815789	7.20959718059174	5.22480221916605	0.000472474574877044	0.00694425716756514	0.0809359407047916
UTP15	98	115	0	A_23_P213441	NM_032175	UTP15	1.013729606014	9.86692293270639	5.58813184973227	0.000289082635058214	0.0051664172168784	0.586301082285789
KRT33B	93	83	0	A_23_P89665	NM_002279	KRT33B	1.0137705985776	7.69092099228644	5.68290900028811	0.000255085177835423	0.00481901701004662	0.714892796756019
NOL6	294	24	0	A_24_P21410	NM_022917	NOL6	1.01406020609359	9.52019584619401	3.97133444959386	0.00297464155305873	0.0207285548223671	-1.81018848979159
IQCJ-SCHIP1	331	63	0	A_33_P3332547	NM_001197113	IQCJ-SCHIP1	1.01475876323134	9.91583022262949	3.76152796174171	0.00413490335418401	0.0254560761001626	-2.14680618283091
NECAP1	69	147	0	A_32_P144920	NM_015509	NECAP1	1.01524088532281	8.90723310229004	4.99155204687761	0.000654105506854671	0.0084081135055882	-0.253894919919759
HRK	328	120	0	A_23_P25194	NM_003806	HRK	1.01683471396233	6.72060268508508	3.51386780610251	0.00614253612850861	0.0331394577998419	-2.54978230808099
FOXP1-IT1	282	140	0	A_21_P0014714	lnc-EIF4E3-1:1	FOXP1-IT1	1.01868998984302	7.33969033708312	3.18150656396147	0.0105570610599832	0.0466955974724423	-3.09756380671392
MLXIP	120	27	0	A_24_P415624	NM_014938	MLXIP	1.01988708824421	10.4036173580837	3.57739832227822	0.00554572758717105	0.0310576383168748	-2.44589811215759
DIMT1	158	158	0	A_23_P58529	NM_014473	DIMT1	1.02043282671054	12.3986533401742	4.065297351976	0.00257154029654072	0.0190119275157929	-1.6610535091599
C8orf38	236	113	0	A_33_P3272165	NM_152416	C8orf38	1.02150964341895	10.1191490410348	5.39626266376191	0.000373839604674933	0.00599350518574706	0.321882884076183
FAM107B	134	34	0	A_33_P3288942	NM_001282695	FAM107B	1.02283586951977	8.24174266635017	7.4736348807051	2.98122340802406e-05	0.00172867436155789	2.90530319857097
LOC100287482	11	73	0	A_21_P0013271	NM_001195243	LOC100287482	1.0231280353972	6.36322415707867	4.1006301534926	0.00243526940941387	0.0183459271582587	-1.60525035262993
DYX1C1	91	75	0	A_33_P3344169	NM_001033560	DYX1C1	1.02494179351664	8.6916185020171	7.30646528978213	3.58428723376281e-05	0.00189193207873832	2.71898428429849
ANXA10	33	64	0	A_23_P58328	NM_007193	ANXA10	1.02613112053899	6.61715448436898	4.10925654974282	0.00240317328048255	0.0182077334670037	-1.59164958252748
TMEM79	36	5	0	A_23_P149259	NM_032323	TMEM79	1.02716663023936	9.42869852780348	5.90673741146152	0.000190758007408317	0.00406813855262193	1.01330941037318
CPNE7	220	47	0	A_33_P3262191	NM_014427	CPNE7	1.02784143067408	14.3104868389097	7.43752210836323	3.10145860008735e-05	0.00176616395118953	2.86534912899931
PAPPA	83	121	0	A_33_P3599591	NM_002581	PAPPA	1.02875899637865	12.6437719426917	4.84381666203219	0.000807022845954495	0.00944267174210358	-0.470150698518826
POLR3C	117	34	0	A_23_P35256	ENST00000334163	POLR3C	1.02897271756922	10.2594985649458	7.25210990422457	3.80807956029252e-05	0.00189992928827684	2.65764489429814
C11orf61	47	68	0	A_23_P52885	NM_024631	C11orf61	1.02905462145039	8.22509659942226	3.15888700746661	0.0109574939506164	0.0477542705989472	-3.13503217365384
C14orf126	249	89	0	A_23_P37144	NM_080664	C14orf126	1.02914588788887	9.23284569367952	4.13635962450453	0.0023052109908744	0.0177705930242661	-1.54897801024233
TTLL11	38	114	0	A_23_P333852	NM_194252	TTLL11	1.02919126995842	7.04793784102667	4.33388573518717	0.00170735669340767	0.0150034960582587	-1.24083933386947
TOMM70A	165	122	0	A_23_P144264	NM_014820	TOMM70A	1.02958881638913	9.5414480990961	3.59411145512761	0.00539900967747713	0.0305031550343769	-2.41862392045089
WDR35	209	16	0	A_33_P3335865	NM_001006657	WDR35	1.03162514154989	10.2195557439972	4.19781104805105	0.00209842409509423	0.0167958498855703	-1.45257153419388
FHL2	20	17	0	A_23_P108751	NM_001039492	FHL2	1.03381576779177	13.7421554636776	7.99913658884394	1.70326076525633e-05	0.00140293254588244	3.46882393754933
RFC3	29	41	0	A_33_P3214446	NM_181558	RFC3	1.03385034156847	10.1895422714074	4.24590062023242	0.00195033912100743	0.0160662710168986	-1.37746602311876
LOC100009676	88	63	0	A_23_P306479	NR_024407	LOC100009676	1.03427847003582	6.97834511500152	4.88720372244877	0.000758488188585672	0.00910873797448916	-0.406306281356235
CLTCL1	23	79	0	A_23_P143559	NM_007098	CLTCL1	1.03431888277035	8.75292942075987	3.12706927638639	0.0115474075559258	0.0493650434033262	-3.18776064569629
TGDS	340	95	0	A_23_P65217	NM_014305	TGDS	1.03484266255951	8.72417490973744	6.64837913362958	7.6344379758892e-05	0.00260291739401132	1.95047744122178
CREB5	299	9	0	A_23_P157117	NM_182898	CREB5	1.03500395986765	6.61507273430509	7.79076794063082	2.1193008598889e-05	0.00155886352138495	3.24932132302055
DPF3	65	157	0	A_23_P307392	XR_432995	DPF3	1.03508988911516	6.92408902560075	5.76708625783202	0.000228494425720767	0.00452094574825847	0.827986999690968
UTP14A	253	91	0	A_23_P205216	NM_006649	UTP14A	1.03534086407594	9.23105296997896	7.42372353757793	3.14878779621259e-05	0.00178671216093663	2.85004003661052
ZNF425	177	8	0	A_24_P941166	NM_001001661	ZNF425	1.03534177775407	8.56775254799481	5.26252244521859	0.00044859135905436	0.00672158629525455	0.134320097777144
LOC100652740	314	56	0	A_21_P0014012	NR_102400	LOC100652740	1.03677231965304	6.2460214588485	4.81000988135712	0.000847143326466681	0.00973908333639843	-0.520089384975036
XLOC_014119	99	135	0	A_21_P0010302	lnc-C21orf67-1:2	XLOC_014119	1.03765665514086	6.68168190928221	4.23033564558242	0.00199701765960228	0.0162627455539523	-1.40174224326097
GTPBP2	213	149	0	A_23_P379026	NM_019096	GTPBP2	1.03876748347671	11.1200027827172	4.74499562602047	0.000930423927889519	0.0103053915638313	-0.616597011855747
ERVMER34-1	27	53	0	A_19_P00320259	NM_001242690	ERVMER34-1	1.03879460084888	8.28684321700134	3.34367510963197	0.00809463111233192	0.0394606626721835	-2.82951857278345
C5orf22	294	12	0	A_23_P7761	NM_018356	C5orf22	1.03883821636215	8.95855910881069	3.86202894635754	0.00352893053736667	0.02307914292727	-1.98496231008956
PUS3	197	29	0	A_23_P13073	NM_031307	PUS3	1.0389361509478	9.61304245769192	6.49225923001741	9.20388692827134e-05	0.00287179312623841	1.75963709343981
ZNF473	175	70	0	A_24_P941376	NM_015428	ZNF473	1.03935123999217	7.93503169971578	3.82659320326034	0.00373117434758593	0.0238075895720664	-2.04190562765564
WARS2	300	18	0	A_33_P3338417	NM_201263	WARS2	1.03954767714371	8.9154054738367	4.90584945286319	0.000738599295989637	0.00900532215976683	-0.378954143261562
ACTR5	286	157	0	A_23_P165952	NM_024855	ACTR5	1.04126886765286	8.5116876256888	5.5514398661231	0.000303531011542645	0.00535067503130399	0.536159699578353
XLOC_011480	88	57	0	A_21_P0008848	ENST00000261837	XLOC_011480	1.04138199811103	8.13376476847555	4.71883170313135	0.000966372457205064	0.0105451412088421	-0.655608629331478
UPP1	34	97	0	A_23_P147805	NM_001287428	UPP1	1.04155303182161	11.6866029013197	4.08702387571676	0.00248681911230351	0.0186370670076783	-1.6267213585505
C8orf31	321	66	0	A_33_P3431595	NM_173687	C8orf31	1.04218265563272	10.014407923638	5.01109514679333	0.000636327911919373	0.00824631147192088	-0.225529648634488
SNHG7	124	24	0	A_33_P3280927	NR_024542	SNHG7	1.04253114359067	9.17261538568684	7.36244290084368	3.36870789732396e-05	0.00185840385669038	2.78176392219775
SNORD47	124	121	0	A_21_P0000287	NR_002746	SNORD47	1.04288800912264	10.2839731697426	3.80108295225486	0.00388429356065238	0.0244701253337213	-2.08298187226644
XLOC_006928	217	119	0	A_21_P0005763	lnc-EFR3A-2:1	XLOC_006928	1.04309113167116	8.42237500607031	7.69843993417186	2.33811043563854e-05	0.00158937526028201	3.15042058489526
PINX1	273	152	0	A_23_P82823	NM_017884	PINX1	1.04366530733662	9.29066385183934	4.93764872556426	0.000705957455917343	0.00878570516513799	-0.332425025289432
SARS	211	125	0	A_33_P3359748	ENST00000369923	SARS	1.04376901135316	11.0111030975638	6.14709350509102	0.000140673892782491	0.00356856168423899	1.32561081230231
RBM3	326	104	0	A_33_P3349827	NM_006743	RBM3	1.04481592340992	12.0490163010082	8.46012428149163	1.06634380873811e-05	0.00122768626327762	3.93683669437829
SLC22A15	9	68	0	A_33_P3361412	NM_018420	SLC22A15	1.04572079582712	8.05557365040397	5.05105037415397	0.000601574750830072	0.00795159703925806	-0.167714480686056
ZNHIT6	10	129	0	A_24_P113686	NM_017953	ZNHIT6	1.04604127002771	9.1944645100207	6.48771574665802	9.25451964145308e-05	0.00287179312623841	1.75403270082162
DNAJC25	288	27	0	A_23_P397019	NM_001015882	DNAJC25	1.04727450893057	8.80901495042742	5.06353620836583	0.000591136644774789	0.00790570623921031	-0.149696215744908
C10orf2	9	138	0	A_23_P138461	NM_021830	C10orf2	1.04828037086689	8.20521855322273	9.70337582425669	3.31464075605969e-06	0.000694336502044941	5.08817638991666
ZNF259	176	89	0	A_23_P64232	NM_003904	ZNF259	1.05040631409744	11.4682927962682	6.30034301376039	0.000116304280470287	0.0032627118920685	1.52039303481236
XLOC_001788	196	82	0	A_21_P0002334	lnc-OBFC2A-1:1	XLOC_001788	1.05177357463029	6.3130128161169	5.03422827365719	0.000615951860784854	0.00806115581890426	-0.192027096017894
FBXW10	19	42	0	A_23_P218358	NM_001282540	FBXW10	1.05187845603009	6.80552621098301	6.69787981507468	7.19953277252038e-05	0.00252508116313033	2.01028854071313
DNAJA3	38	163	0	A_23_P118306	NM_005147	DNAJA3	1.05227846905701	12.2590478748203	5.0995200304042	0.000562126988092272	0.00767274363128008	-0.0978980256228645
TNAP	47	75	0	A_33_P3304688	AF463496	TNAP	1.0535421324287	7.69676696296865	4.31704447361903	0.00175125094351889	0.0151791129708245	-1.26691134659089
CDK5R1	349	51	0	A_33_P3226985	NM_003885	CDK5R1	1.05364884507805	8.73229238508875	5.23852104479188	0.000463633696499922	0.00686539654229719	0.10037635575962
XLOC_l2_005039	282	5	0	A_21_P0011387	ENST00000560500	XLOC_l2_005039	1.054032825326	10.2915517751346	6.92699808103533	5.50895052445083e-05	0.00225890620325459	2.28281896994767
SIRT1	301	33	0	A_23_P98022	NM_012238	SIRT1	1.05625694868422	9.17899183351164	4.93812319165602	0.000705482283667013	0.00878570516513799	-0.331731912352634
GRWD1	215	162	0	A_23_P142154	NM_031485	GRWD1	1.05664953988174	11.4687196975967	7.28219271991559	3.68239969921403e-05	0.00189693058856098	2.69163929847688
KIF21A	33	38	0	A_23_P113462	NM_017641	KIF21A	1.05667822630018	6.95271835661995	5.43396388457065	0.000355277015801176	0.00583124093703419	0.374273340676829
RCHY1	115	144	0	A_33_P3263841	NM_001278539	RCHY1	1.05684778053944	7.85985412538855	5.48601367116391	0.000331263574811142	0.00556943457841209	0.446253962857011
ARC	35	110	0	A_23_P365738	NM_015193	ARC	1.05688115957416	10.1670753187238	3.95670162007313	0.00304319234492839	0.0209762429397927	-1.83350697028783
DHX33	84	122	0	A_24_P364970	NM_020162	DHX33	1.05707190071422	8.64565724469695	8.4384869101606	1.089549718489e-05	0.00122912669752477	3.91539624579854
TFB2M	88	66	0	A_23_P45940	NM_022366	TFB2M	1.05765353320182	11.3413668642196	6.68102983352445	7.34447361841852e-05	0.00254043771388358	1.9899663940758
URB2	352	81	0	A_23_P74914	NM_014777	URB2	1.05767490955328	9.80240228114387	8.80019452062675	7.64514730174068e-06	0.00105622695939179	4.26724381532757
DKC1	209	135	0	A_23_P137143	NM_001363	DKC1	1.05797038384598	13.4506139568377	6.78819082168321	6.47385241599707e-05	0.00242146640626144	2.11855324348641
UBXN8	47	143	0	A_23_P157465	NM_005671	UBXN8	1.05809399358413	10.4056347489151	4.68366171614841	0.0010170517646795	0.0108521950552235	-0.708204991274048
GPCPD1	13	137	0	A_23_P91350	NM_019593	GPCPD1	1.05940695192939	8.77036092154882	3.87435842092466	0.00346129493909506	0.0228659888334748	-1.96518136852685
PTPN22	332	91	0	A_23_P201181	NM_012411	PTPN22	1.06025659310479	7.08741363751356	3.82785759713655	0.00372375214342314	0.0237911037269684	-2.03987150343345
PRB4	31	19	0	A_33_P3216150	NM_002723	PRB4	1.06159566289382	7.88764903678776	7.64524795586135	2.47528198605824e-05	0.00158937526028201	3.09297764745538
CHST11	310	81	0	A_23_P139919	NM_018413	CHST11	1.06166321689038	9.24242963872299	6.39651815830038	0.000103375049317719	0.00304387566926362	1.64093159709746
PUS7	54	108	0	A_23_P82478	NM_019042	PUS7	1.06166646649516	11.0570991323751	4.49057129843009	0.00135082507380823	0.0129055374459803	-1.00012454219647
LONRF2	241	159	0	A_33_P3315519	NM_198461	LONRF2	1.06200628922157	6.44462568254349	5.03738250192342	0.000613228247568877	0.00803875445327914	-0.187465150715311
LOC100506178	14	45	0	A_19_P00316371	NR_038393	LOC100506178	1.06271089103673	6.72430942869871	7.03980381636138	4.83982251450746e-05	0.00212089917140634	2.41443275937365
BRMS1L	58	160	0	A_24_P56484	NM_032352	BRMS1L	1.06285926083414	7.91550420006268	3.93267185253054	0.00315940371880516	0.0214515411471694	-1.87185364529136
EIF3J	11	113	0	A_21_P0012407	NM_003758	EIF3J	1.06289661802606	10.6276415053618	7.69358184876295	2.35028758278728e-05	0.00158937526028201	3.14518839897504
DGCR14	58	45	0	A_33_P3340154	NM_022719	DGCR14	1.06290742716941	7.6476787929504	4.10069268991832	0.0024350351059342	0.0183459271582587	-1.60515172162612
LOC100506544	237	160	0	A_21_P0014427	lnc-CHADL-1:1	LOC100506544	1.06394449863727	6.02909518523019	3.81613413404351	0.00379317056977514	0.024077464647458	-2.05873839698578
GOPC	137	99	0	A_23_P58877	NM_020399	GOPC	1.06410703055293	12.7771561205048	3.58483501867332	0.00547993600696065	0.0308304615009174	-2.43375924428867
NT5C3	60	82	0	A_33_P3393836	NM_001166118	NT5C3	1.06486665654968	10.8145883387519	7.03848910023977	4.84709122264984e-05	0.00212089917140634	2.41290846219915
ZNF30	78	147	0	A_32_P203430	NM_194325	ZNF30	1.06513728569305	7.1979384589595	3.80527233549436	0.00385870139598591	0.0243594370884125	-2.07623150385362
MORC2-AS1	147	63	0	A_32_P122793	NR_026920	MORC2-AS1	1.06595006973524	8.25358319844949	5.83400321630831	0.000209492675337191	0.00429597679851846	0.917145795549868
PRMT3	345	110	0	A_23_P9894	NM_005788	PRMT3	1.06600687224034	9.77758931605145	5.62832095513262	0.000274103951843364	0.00501930028983413	0.640991691876883
PDGFA	40	49	0	A_23_P113701	NM_002607	PDGFA	1.0669453613673	8.95432810966371	6.48506441158485	9.28420585654678e-05	0.00287538913545449	1.75076094954716
FAM86EP	188	124	0	A_21_P0012768	NR_024253	FAM86EP	1.06880956168976	6.64258906542393	6.5692886373044	8.38970605612898e-05	0.00271712432090601	1.85421744284384
ABCE1	60	20	0	A_23_P41380	NM_002940	ABCE1	1.07222877339252	10.4641897209757	6.57320876549491	8.35041780735762e-05	0.00271311734403472	1.85900883170947
CTPS	229	153	0	A_33_P3235217	NM_001905	CTPS	1.07238661765028	12.7773000393688	7.22527235573005	3.92415243467781e-05	0.00191836719637419	2.62722050966032
EXOSC2	43	83	0	A_33_P3347132	NM_014285	EXOSC2	1.07329132106234	9.92981743665975	7.34629486547921	3.42940867970699e-05	0.00186597414736934	2.76369418009719
PLK2	55	102	0	A_23_P30254	NM_006622	PLK2	1.07391014893916	12.61090278924	6.70794905806498	7.11440477953956e-05	0.0025062896482777	2.02241425577758
SNORA25	149	94	0	A_21_P0000363	NR_003028	SNORA25	1.07487776882675	8.24704160247317	4.63669441316695	0.00108920315766849	0.0112008153844899	-0.778722300938405
PTPN2	4	68	0	A_23_P309701	NM_002828	PTPN2	1.07518914414057	8.78994359294571	6.4784592082089	9.35861290659812e-05	0.00289279458871655	1.74260586701296
TIGD2	171	99	0	A_32_P20523	NM_145715	TIGD2	1.08057413476432	10.8933864270329	5.10632218974279	0.00055681699433982	0.0076396445648282	-0.088128113387369
CHAC2	328	107	0	A_32_P194264	NM_001008708	CHAC2	1.08114428027929	8.69335478193793	6.56770871891741	8.4055970138587e-05	0.00271712432090601	1.85228578375254
RGS16	26	161	0	A_23_P320578	NM_002928	RGS16	1.08147259559839	6.06831296222758	6.75562797127322	6.72590220454324e-05	0.00245094344554548	2.07964407577241
NUDT4	136	113	0	A_24_P67946	NM_199040	NUDT4	1.08252840057306	8.1562310825773	6.92697973956615	5.50906718323401e-05	0.00225890620325459	2.28279743398268
CTSL1P8	45	17	0	A_21_P0000597	NR_033405	CTSL1P8	1.08359606544624	13.9143806171347	7.5152381242502	2.84897259433448e-05	0.00170237517321656	2.95113173494655
LRRC56	34	52	0	A_23_P368996	NM_198075	LRRC56	1.08411713190847	6.75532259260637	7.3676995064297	3.34920168023831e-05	0.00185408070716468	2.78763902750493
GADD45A	104	98	0	A_23_P23221	NM_001924	GADD45A	1.08454454690066	13.3373650985314	6.86272818325941	5.93471842100052e-05	0.00232816805611991	2.20708116551368
GALNT6	333	24	0	A_33_P3215768	NM_007210	GALNT6	1.08492730565153	8.18526735407009	5.20028167431105	0.000488731209826931	0.00708394054611906	0.0461187157694445
EIF5	333	78	0	A_24_P398810	NM_001969	EIF5	1.08506509402079	8.91901252229599	7.46796094255472	2.99977299272042e-05	0.00172937926352964	2.89903643280622
RSL1D1	278	25	0	A_23_P54605	NM_015659	RSL1D1	1.08644999052594	10.4281514685354	6.46474672589951	9.51515816020778e-05	0.00291847167662898	1.72565642582141
EME2	338	164	0	A_23_P366125	ENST00000570069	EME2	1.08793455426809	6.17742926121337	3.1666574920126	0.0108181981462426	0.0474019669463605	-3.12215898050044
EARS2	282	54	0	A_23_P152353	NM_001083614	EARS2	1.08793458102778	9.84170199011776	4.93197548825728	0.000711665783822526	0.00881977065005639	-0.340715224425518
C3orf80	335	32	0	A_23_P305245	NM_001168214	C3orf80	1.09146144734178	6.61777959143227	8.39941565725983	1.1328652682807e-05	0.00122912669752477	3.8765515751929
ZNF474	15	164	0	A_33_P3360565	ENST00000296600	ZNF474	1.09356130987789	6.85316266895692	3.83870797364508	0.00366069331647822	0.0235742024741995	-2.0224226923922
TYW5	304	99	0	A_32_P36942	NM_001039693	TYW5	1.09544367141888	8.03342301003201	4.59735283438554	0.00115384738124341	0.0116206248785879	-0.838033683023204
FJX1	281	123	0	A_23_P150693	NM_014344	FJX1	1.09549831292498	13.2789377208697	8.04698505754962	1.62089144970767e-05	0.00139778982486948	3.51851647698386
ASB1	115	49	0	A_23_P165360	NM_001040445	ASB1	1.09626415169891	11.5260092685126	8.71721701648981	8.2838103444542e-06	0.00108665053689679	4.18774865647276
KCNIP4	68	104	0	A_33_P3274194	NM_001035003	KCNIP4	1.09780635795515	6.71791881492646	4.69021836955258	0.00100739258899708	0.0107708300497884	-0.698386021034216
FOXC1	198	116	0	A_32_P205110	NM_001453	FOXC1	1.09920437166645	8.17975824990318	5.75087397218273	0.000233373129308995	0.00457497573054201	0.806286795845676
POLR1B	25	152	0	A_23_P209987	NM_019014	POLR1B	1.10303741486075	7.90043316677168	7.14023174045717	4.31815463836641e-05	0.00201333472914688	2.53020512141601
NBN	329	117	0	A_24_P278126	NM_002485	NBN	1.10369096362058	10.2756301759434	4.67697646525852	0.00102700232505115	0.010893323385824	-0.718222930870922
KCNG1	264	91	0	A_33_P3362296	XM_006723786	KCNG1	1.10420348012773	10.0822032880593	6.02338451734164	0.000164390245801833	0.00386938107451782	1.16591808679587
IMPDH2	127	108	0	A_33_P3214298	NM_000884	IMPDH2	1.1048141419047	13.7426162728138	5.81011778743617	0.000216071567701184	0.00436679369299938	0.885396966997114
CEBPG	56	78	0	A_33_P3253807	NM_001806	CEBPG	1.10486570479227	12.5977112370452	4.23248509241326	0.00199050167610301	0.0162263163827217	-1.3983879344034
AP1AR	236	103	0	A_23_P69791	NM_018569	AP1AR	1.10524433385555	9.25949262175087	7.5619654614249	2.70801569044913e-05	0.00165333448880887	3.00235080291222
INTS7	351	50	0	A_23_P52082	NM_015434	INTS7	1.10661049780176	9.28889083304386	3.96613264022724	0.00299882210907733	0.0208148910742773	-1.81847510984648
DYNC1LI1	80	46	0	A_23_P69141	NM_016141	DYNC1LI1	1.10705556554981	9.93278336510162	6.77221462278766	6.59620704795258e-05	0.00242146640626144	2.09948123806847
ELMOD1	369	54	0	A_23_P401774	NM_018712	ELMOD1	1.10915319492731	8.02234612027847	5.03989992490416	0.000611063775667384	0.00803117103625163	-0.183825276101317
SNORD11	27	112	0	A_21_P0000366	NR_003031	SNORD11	1.10975644604334	8.28338774314897	4.35889161647783	0.00164432569983824	0.0146113236683612	-1.20219806342148
FAM132A	358	154	0	A_32_P75792	NM_001014980	FAM132A	1.11046647612439	7.73627619360597	4.98872140526453	0.000656724286032113	0.0084145447229663	-0.258008075883813
SETD7	19	102	0	A_33_P3255229	BC066361	SETD7	1.11067220578903	9.31910097678962	6.62858241122692	7.81629046065101e-05	0.0026295913581361	1.92646362723312
ASB5	183	47	0	A_23_P144326	NM_080874	ASB5	1.11119568524692	6.52009096568927	8.19059786653485	1.39871729764185e-05	0.00132085868941664	3.66609431729806
CCNB1IP1	361	151	0	A_23_P76882	NM_182852	CCNB1IP1	1.11225587082836	11.3330066246176	5.93255007605213	0.000184551687343622	0.0040119052764825	1.04725079665336
FAM207A	62	147	0	A_33_P3288700	NM_058190	FAM207A	1.11239231767282	8.74560964757945	6.75315573771913	6.74546948617436e-05	0.00245244895186128	2.07668417413401
NOC3L	9	94	0	A_23_P202496	NM_022451	NOC3L	1.11292295624973	11.0636346255364	7.01565831017847	4.97523012379263e-05	0.0021421803850086	2.38640212333925
ZNF202	16	19	0	A_23_P127652	NM_003455	ZNF202	1.11390432093852	6.77574473468773	8.96920478710667	6.50465589387875e-06	0.000948128191210511	4.42696845861044
SLC1A5	361	65	0	A_23_P55998	NM_005628	SLC1A5	1.115288833825	11.4095157016575	4.17077137644905	0.0021868834528554	0.0172261796226904	-1.49493277042771
DDAH1	142	120	0	A_23_P201386	NM_012137	DDAH1	1.1182144432358	8.23135902032172	6.77315386614127	6.58894466150688e-05	0.00242146640626144	2.10060343593663
SLC30A1	281	110	0	A_23_P23815	NM_021194	SLC30A1	1.12061560725458	10.9918221529846	4.5988723389092	0.00115127601984223	0.01160626484978	-0.835738774937895
RRP1B	77	68	0	A_24_P944040	NM_015056	RRP1B	1.1208242167336	11.29670353632	6.96555671548397	5.2695433300328e-05	0.00220322380072529	2.32799492658918
DKFZp686M1136	159	76	0	A_33_P3736195	BX647230	DKFZp686M1136	1.12133817255923	7.92351878132398	4.28877813695814	0.00182763874129315	0.0154454916604604	-1.31075578665776
MARCH4	246	89	0	A_23_P333228	NM_020814	MARCH4	1.12200602358872	7.2044630724656	3.65908677574712	0.0048660757064257	0.0284759524212492	-2.31282110193417
XLOC_000048	203	67	0	A_21_P0000948	lnc-APITD1-1:2	XLOC_000048	1.12613207931011	7.60106288330421	6.50450719182543	9.0688873004853e-05	0.00285475762336306	1.77473068358316
CLCF1	372	33	0	A_23_P138760	NM_013246	CLCF1	1.12685145873948	11.4316460248412	9.81370105651714	3.00633814594805e-06	0.000663398617539204	5.18316308825212
ATP6V0D2	2	23	0	A_23_P146146	NM_152565	ATP6V0D2	1.12714617265582	7.06752742453181	4.54475722428582	0.00124673734726138	0.0122272610946227	-0.917670987410578
NOM1	151	139	0	A_33_P3378430	NM_138400	NOM1	1.12734388157357	9.02711020187937	4.60529119496466	0.0011404810672754	0.0115614055489485	-0.826048006116361
TOB2P1	236	115	0	A_33_P3348011	NR_002936	TOB2P1	1.12768245197214	7.95850860877242	4.50025577873393	0.00133156282101256	0.0127752838769611	-0.98535765166724
PRH2	50	129	0	A_23_P99076	NM_005042	PRH2	1.12896690741908	8.72261812231565	6.6769459137095	7.38007828437356e-05	0.00254185666500022	1.98503510795046
AKAP2	337	78	0	A_23_P359043	NM_001004065	AKAP2	1.12989756768042	9.2334226680669	5.5069622618497	0.000322097779265025	0.00550860012590174	0.475110036030888
KCNJ14	374	6	0	A_23_P130764	NM_013348	KCNJ14	1.13122160753652	9.06445018380553	5.02982837960912	0.000619772783366247	0.00809782070898267	-0.198393114192858
LOC100507265	306	85	0	A_21_P0014096	BX102845	LOC100507265	1.13238927549099	7.73220256352323	7.04568453180134	4.80745456793299e-05	0.00212089917140634	2.4212481650866
ITPRIP	252	155	0	A_23_P340333	NM_033397	ITPRIP	1.13347256111591	11.7388887391733	7.9289794734838	1.83241803116873e-05	0.00145181832017355	3.3954847098885
SRF	96	94	0	A_24_P337657	NM_003131	SRF	1.13398022879038	6.84276703142151	4.97171230936669	0.000672698964699161	0.00855711861580486	-0.282748734952924
LOC344887	191	28	0	A_24_P68908	NR_033752	LOC344887	1.13437047496805	8.62494842278654	3.98838633280972	0.00289680806073571	0.020382854946399	-1.7830465026556
LONRF1	127	93	0	A_23_P94216	NM_152271	LONRF1	1.13535702971195	9.65205024280498	4.83518680807424	0.000817067261578553	0.00953227924238706	-0.482882604538862
TNFRSF9	119	10	0	A_23_P51936	NM_001561	TNFRSF9	1.1357125884423	9.99793891989986	7.64777523316932	2.46856956638809e-05	0.00158937526028201	3.09571462663216
NDUFAF4	275	81	0	A_24_P171983	NM_014165	NDUFAF4	1.13618039800409	11.7099766393458	7.00513062411996	5.03555545461744e-05	0.0021564664437456	2.37415657460091
PDSS1	177	11	0	A_23_P161152	NM_014317	PDSS1	1.13722611573482	10.5331028359488	4.48559792853741	0.00136083216944525	0.0129699469155046	-1.00771302656973
RAB39B	15	64	0	A_24_P408603	NM_171998	RAB39B	1.13839256725309	8.57989332408219	6.40132498989623	0.000102771131474079	0.00304064755467443	1.64692195748652
MPP3	110	57	0	A_23_P141345	NM_001932	MPP3	1.13864512651901	9.78601470125353	5.59673409695284	0.000285803779893436	0.00512916407769062	0.598027486822571
SRPRB	69	54	0	A_23_P80773	NM_021203	SRPRB	1.13971143410385	13.2016164151494	5.53458000756036	0.000310429508600051	0.00541596863207753	0.513052665709322
KIAA0020	105	59	0	A_23_P20683	NM_014878	KIAA0020	1.14032853997848	12.4871212103275	7.89021095353024	1.90835037762296e-05	0.00147183838833367	3.35471208552246
METTL21D	335	139	0	A_23_P128940	NM_024558	METTL21D	1.14098162594709	8.03951807152401	7.18997282626034	4.08273088755467e-05	0.00194947490847242	2.58706306791895
ABTB2	301	121	0	A_23_P356616	NM_145804	ABTB2	1.14138589112041	11.7905325011315	7.2912813641338	3.6453237620999e-05	0.00189693058856098	2.70188711962635
NUFIP1	128	102	0	A_23_P36939	NM_012345	NUFIP1	1.1416034563732	8.42185780014223	4.71616980783526	0.000970112173875521	0.0105641824664388	-0.659583205036766
SCG5	308	159	0	A_23_P62081	NM_003020	SCG5	1.14275336255317	13.1485795459651	7.57651251680542	2.66570029662274e-05	0.00164796289154638	3.01824161093272
IL17D	227	67	0	A_23_P345692	NM_138284	IL17D	1.14311259501251	7.10660045970399	5.09079863735517	0.000569014886430915	0.007707168385008	-0.110434621588785
FHOD3	189	41	0	A_32_P34444	NM_025135	FHOD3	1.14437836029221	11.5123765980715	8.69218677911464	8.48776059748225e-06	0.00108730978348188	4.16362788865404
FABP5	70	82	0	A_23_P59877	NM_001444	FABP5	1.14655466632292	11.2065834613943	8.25369356309212	1.31182679149704e-05	0.00129234804723312	3.73019599421518
ZNF643	297	119	0	A_23_P160200	NM_023070	ZNF643	1.14667773242999	8.29115157270075	5.16911457510951	0.00051026750639105	0.00725145808724597	0.00173417089690542
CHM	171	132	0	A_23_P22548	NM_000390	CHM	1.14668207784324	8.8616588763311	3.85659576389436	0.00355917544673362	0.0231659891428528	-1.99368435833433
RWDD4	328	40	0	A_32_P76156	NM_152682	RWDD4	1.14691897655347	8.33395539334311	4.73026273396227	0.000950487182868545	0.0104568401989787	-0.638552209071075
RRP15	314	78	0	A_23_P23356	NM_016052	RRP15	1.14768451522652	9.49553860506168	5.96236032354796	0.000177654752162511	0.00394766252078039	1.08632766195337
RGAG1	22	95	0	A_23_P306352	NM_020769	RGAG1	1.14901692581316	7.62731511616782	3.21805142047686	0.00994169524470593	0.0450584856266012	-3.03706366693648
SPOCD1	284	70	0	A_23_P431388	NM_144569	SPOCD1	1.14922914336407	13.873346093868	10.3613052375886	1.876511057415e-06	0.000542072866912901	5.63877079036733
COL20A1	52	61	0	A_32_P185637	NM_020882	COL20A1	1.14931231606976	6.37950008657188	6.61732627566749	7.92178386086441e-05	0.00264694444006616	1.91278577898962
SNORD6	354	143	0	A_21_P0000370	NR_003036	SNORD6	1.15129464299964	6.83708555725347	5.82476050383983	0.000212012400282451	0.00432963112556245	0.904870207000965
NOL11	310	142	0	A_23_P55073	NM_015462	NOL11	1.1523660590951	10.9729239537005	6.04833731915172	0.000159278671015977	0.00380679792972076	1.19830695895792
C11orf94	143	92	0	A_33_P3314813	NM_001080446	C11orf94	1.15415848733496	6.53060863712694	4.44328611114133	0.00144923156525845	0.0134494106944079	-1.0724125983825
XLOC_000721	277	42	0	A_21_P0001471	lnc-ZBTB17-2:1	XLOC_000721	1.15572760464607	7.81206091186905	3.8617493452538	0.00353048037374759	0.02307914292727	-1.98541108374042
NCDN	178	81	0	A_23_P97736	NM_014284	NCDN	1.15778921223761	10.4133006984427	3.48710753272347	0.00641362875376938	0.0340687842326606	-2.59363451996333
C6orf228	23	7	0	A_19_P00326732	NM_001135575	C6orf228	1.16200132958273	8.80627965934268	6.77427060606211	6.58032115312516e-05	0.00242146640626144	2.10193755002551
FAM86A	17	137	0	A_33_P3222045	NM_201400	FAM86A	1.16484218684519	9.75947102745464	6.00490400737592	0.00016829036775223	0.00389885891930266	1.14187210643144
CDK17	165	151	0	A_33_P3341224	NM_001170464	CDK17	1.16501079814269	6.89148420167381	6.0962792616569	0.000149934143990964	0.00368754439586445	1.26028315921128
XPO4	91	157	0	A_24_P333716	NM_022459	XPO4	1.16907002809889	8.59328085123251	4.16862631396925	0.00219406810059851	0.0172485670372633	-1.4982972985849
NOP58	52	144	0	A_23_P154447	NM_015934	NOP58	1.1698404839514	14.0044942594017	6.34197088184283	0.000110504638217323	0.00316341926485915	1.57272629331901
HBEGF	257	96	0	A_24_P140608	NM_001945	HBEGF	1.17166915146495	8.69262788615439	4.86425915359166	0.000783753152346466	0.00931487289042482	-0.440034888995067
TTC27	371	56	0	A_23_P131227	NM_017735	TTC27	1.17175216069113	11.5995388953275	3.89278870476575	0.00336272528658538	0.0224223139657048	-1.93564364668993
CDC6	34	104	0	A_33_P3218450	NM_001254	CDC6	1.17228944367068	6.96193770304724	4.88574214272115	0.000760071282353857	0.00912085538824628	-0.408452496207152
AGT	6	81	0	A_23_P115261	NM_000029	AGT	1.17248737172984	7.78528370835471	4.79781295929848	0.000862137663840203	0.00981668553972968	-0.538147540462269
B7H6	349	142	0	A_33_P3356210	NM_001202439	B7H6	1.17267450077021	8.32541705426404	6.60561267707142	8.03320929424583e-05	0.00265899227639537	1.89853359441632
IRF1	340	50	0	A_23_P41765	NM_002198	IRF1	1.17267761277204	10.328087831504	7.05557431615024	4.75355052256367e-05	0.00211552971155439	2.43269966583633
AKAP12	22	93	0	A_23_P111311	NM_144497	AKAP12	1.17443602237994	9.7369990242397	9.39109822733894	4.39200260471246e-06	0.000792956106632631	4.81324011715033
GAS5	247	86	0	A_33_P3326285	NR_002578	GAS5	1.17475779211004	15.7872011207093	10.0842783608598	2.37533116259861e-06	0.000601607629328004	5.41152688428717
ATF4	364	146	0	A_23_P120933	NM_001675	ATF4	1.17591268331181	16.0657455317461	8.30627704457989	1.24391377498747e-05	0.00127367287025813	3.78327861074463
XLOC_012709	234	26	0	A_21_P0009495	NR_126336	XLOC_012709	1.17637847222721	6.96443342927193	5.84794739144832	0.000205752308608056	0.0042620504291588	0.935641824991539
ADAMTS6	65	71	0	A_33_P3286953	NM_197941	ADAMTS6	1.17847467434526	7.49792100406534	6.89672122978332	5.70523339724388e-05	0.00229122119937748	2.24720812120909
PHLDA2	73	86	0	A_23_P47614	NM_003311	PHLDA2	1.17868168251224	11.6866484108793	5.97939357861686	0.000173839518572961	0.00391154242896493	1.1085976410746
CCL26	257	150	0	A_23_P215484	NM_006072	CCL26	1.1793165332337	7.7127876345269	5.45663426825693	0.000344594936440267	0.00572690831607005	0.405674364369073
TNFRSF21	124	64	0	A_23_P30666	NM_014452	TNFRSF21	1.18020430053788	13.3941645897363	8.70134423157347	8.41251359757714e-06	0.00108665053689679	4.17246022136917
TSEN2	181	37	0	A_23_P92012	NM_025265	TSEN2	1.18051905803206	10.6816045115364	5.00332506078604	0.000643333204346014	0.00830998207369876	-0.236800522859737
IPO4	321	53	0	A_23_P162970	NM_024658	IPO4	1.18274000438584	11.7529684510646	3.47777818194688	0.00651104490178281	0.0344251186021715	-2.60893507694924
BCAR3	296	124	0	A_23_P97394	NM_003567	BCAR3	1.18384256258505	10.7767549498778	7.72839442241764	2.26453196179624e-05	0.00158937526028201	3.18261915502592
ACOX2	50	141	0	A_23_P10182	NM_003500	ACOX2	1.18518448259909	10.0415743762654	5.70733970370883	0.000247039289784278	0.00475752755890014	0.747823954198069
MRPL1	304	153	0	A_23_P84821	NM_020236	MRPL1	1.18592681816048	8.11725199630542	7.490769600245	2.92596068058579e-05	0.00172723850516828	2.92420402587191
CYP27B1	215	26	0	A_23_P36397	NM_000785	CYP27B1	1.18691418441005	6.87043479184322	4.53449544052898	0.00126577330253882	0.0123372485187934	-0.93325444006804
BEX1	174	104	0	A_23_P159952	NM_018476	BEX1	1.18748976959365	9.09135101804118	5.26859781337893	0.000444867586818089	0.00669991438421568	0.142898459200186
SLC6A9	328	161	0	A_33_P3402615	NM_201649	SLC6A9	1.19177552097326	9.81556394465262	3.41180846119489	0.00724536522960826	0.0368813209513314	-2.71730282058168
LYAR	186	48	0	A_23_P41327	NM_017816	LYAR	1.19206287206462	11.4285634642518	7.24636020771228	3.83262856452482e-05	0.00189992928827684	2.65113447950848
THSD1	160	118	0	A_23_P14184	NM_018676	THSD1	1.19479763562451	8.40076572402777	5.37449525747711	0.000385030603120315	0.00609299424539398	0.291537659906367
BYSL	329	43	0	A_23_P145197	NM_004053	BYSL	1.19507061997085	11.7786052134792	7.94398528314039	1.80391872184211e-05	0.00144750811376906	3.41121916907786
FBXO32	170	89	0	A_33_P3378126	NM_058229	FBXO32	1.19621885366508	12.7825518347881	7.47372238960794	2.98093829988586e-05	0.00172867436155789	2.90539981942283
DOCK10	143	81	0	A_23_P16722	NM_014689	DOCK10	1.19718429806697	13.7742230776665	5.02196420158213	0.000626665626649716	0.0081744363515687	-0.209778629007642
BEX5	51	95	0	A_32_P69849	NM_001012978	BEX5	1.19877661092103	6.70770411992626	3.59181133728073	0.00541895844074832	0.0305957397678071	-2.4223760847205
SLC19A2	201	108	0	A_23_P160466	NM_006996	SLC19A2	1.2019510145663	9.34961709759197	4.50368831802999	0.00132480597782858	0.0127335253331763	-0.980126866725058
C6orf192	80	78	0	A_33_P3321230	NM_052831	C6orf192	1.20390396463055	9.52692355208794	4.30641241045972	0.00177957784572026	0.0152640743432806	-1.28339043792066
MAK16	34	136	0	A_23_P111961	NM_032509	MAK16	1.20426330474007	11.7426465965086	6.54257128301555	8.6628788919191e-05	0.00275271639669621	1.82150560497475
LOC100129361	308	77	0	A_21_P0000666	NM_001271592	LOC100129361	1.20535879104466	8.54888757715974	6.81710557048821	6.25863536026502e-05	0.00237888034937537	2.15298367504966
KLHL21	151	67	0	A_23_P341223	NM_014851	KLHL21	1.20842148729894	14.1289999470192	7.35250721079722	3.40591638682752e-05	0.00186597239841088	2.77064970800308
EIF6	278	119	0	A_23_P210939	NM_181468	EIF6	1.20870162919791	15.5856876855354	7.26500464451435	3.75364464668789e-05	0.00189693058856098	2.67223038546716
SURF2	73	136	0	A_23_P146479	NM_017503	SURF2	1.21061936931752	11.8987012711724	7.06651444262413	4.69468704212476e-05	0.00210703920127904	2.44535251008868
PDCD11	318	130	0	A_33_P3361182	NM_014976	PDCD11	1.21294129979368	8.89814611425048	5.8996410400092	0.000192503539152135	0.00409437246325184	1.00396124003716
1	65	156	0	A_23_P24129	NM_012242	1	1.21302050839731	9.35494731914191	3.30596458687055	0.00860846129771027	0.041023165296347	-2.89174139575263
DLC1	56	129	0	A_24_P940115	NM_182643	DLC1	1.21404397042978	10.0198422659093	4.25447157260644	0.00192513064086144	0.015953408402131	-1.36411169992254
PPARGC1B	82	45	0	A_23_P213959	NM_133263	PPARGC1B	1.21461310056468	8.65882430808995	4.387872385478	0.00157435567716455	0.014207276793598	-1.1575204125343
LTF	163	92	0	A_23_P166848	NM_002343	LTF	1.21668847263752	6.32726210057002	6.47411385223895	9.40791585744878e-05	0.00289676292913074	1.73723758339637
TAF2	191	86	0	A_23_P43248	NM_003184	TAF2	1.21697394594259	10.910686622859	4.42260985478051	0.00149463449288474	0.013703770411541	-1.10411911075525
JAG1	268	119	0	A_23_P210763	NM_000214	JAG1	1.21735951648944	8.25244440117974	4.96903979960614	0.000675246593119581	0.00857579366225731	-0.286639947455853
DCAF13	55	140	0	A_23_P215875	NM_015420	DCAF13	1.21747406453534	11.9387116937395	5.89319792057074	0.000194103356123377	0.00410497890458349	0.995467229260784
USP14	201	144	0	A_33_P3239954	NM_005151	USP14	1.21825108328408	9.35688711479706	3.66437162298818	0.00482522177576112	0.0283412656463189	-2.30423216056145
SETD6	345	49	0	A_23_P129358	NM_024860	SETD6	1.21841400852393	8.78619848685896	5.49164174590762	0.00032877377612016	0.00553929772534158	0.454012903574832
XLOC_002629	234	20	0	A_21_P0002953	lnc-C3orf77-2:1	XLOC_002629	1.21897783402986	7.84049287326861	4.5896035257348	0.00116705669464567	0.0116985468545934	-0.849742580086705
MCM10	294	46	0	A_33_P3867534	NM_182751	MCM10	1.21933086472155	9.70960284520636	3.53024794724936	0.00598251703655146	0.0325514488618937	-2.52296701044375
AADAT	18	2	0	A_23_P253484	NM_016228	AADAT	1.22173946108374	8.82166719553796	5.69596036534975	0.000250752276330904	0.00476841509807218	0.732496265362614
DDX21	69	69	0	A_33_P3287815	NM_001256910	DDX21	1.22207451290849	13.2741631365197	5.49509604623837	0.000327255626783132	0.00553750398570682	0.458772708719619
LOC340037	210	36	0	A_33_P3679876	NR_038915	LOC340037	1.22474975106814	8.27880444216074	4.65981979045616	0.0010530178445105	0.0110065021090371	-0.743961913901602
LOC643783	71	136	0	A_32_P12327	NR_125363	LOC643783	1.22509807107917	7.06332926972823	5.52702583156673	0.000313575111596401	0.00543895346402141	0.502685660245
NECAB2	345	159	0	A_23_P66011	NM_019065	NECAB2	1.22643845901074	6.91710567709246	4.25617146845371	0.00192017219142502	0.0159475670555989	-1.36146425294201
GATA3	152	115	0	A_33_P3360341	NM_001002295	GATA3	1.22838376748973	6.94123391663529	3.79243239702824	0.00393770420720474	0.0246696547492385	-2.09692631632033
ENPP2	264	85	0	A_23_P94338	NM_006209	ENPP2	1.22946241194455	11.3247127938991	3.15047647576887	0.0111103465193522	0.0480722182732755	-3.14896761428572
ODC1	158	86	0	A_23_P165840	NM_002539	ODC1	1.2300856714067	14.3508339003739	5.58896380619298	0.000288763758577477	0.0051664172168784	0.587435668715501
YRDC	119	111	0	A_23_P62840	NM_024640	YRDC	1.23154087132962	13.1834142401694	8.74882949385387	8.03385619809235e-06	0.00108171107860416	4.2181188989061
ACTR3B	140	62	0	A_33_P3334313	NM_020445	ACTR3B	1.23336143786242	8.61844754422074	4.65749020853384	0.00105660422163097	0.0110065021090371	-0.747460092668923
SLMO1	128	157	0	A_23_P38677	NM_006553	SLMO1	1.23452289259439	11.5126499836663	11.1919187097659	9.54747752404249e-07	0.000459667645157537	6.28271318357604
CIRH1A	159	98	0	A_24_P25346	NM_032830	CIRH1A	1.23871621278327	13.1790163314184	4.93084908975658	0.000712805024026087	0.00882609275547191	-0.342361776715189
TRMT6	332	44	0	A_23_P210747	NM_015939	TRMT6	1.24035611735236	9.85766858841492	6.68696298335849	7.29307906960196e-05	0.00253550197500735	1.99712655672849
NAA15	40	63	0	A_24_P226116	NM_057175	NAA15	1.2428733251319	8.31271369542261	3.59392309449978	0.00540064042747371	0.0305031550343769	-2.41893117473371
ORAOV1	306	122	0	A_24_P104091	NM_153451	ORAOV1	1.24823537455463	10.903248632521	7.45633640167556	3.03817097101645e-05	0.00173634749595357	2.88618487464326
PARP12	38	153	0	A_23_P111804	NM_022750	PARP12	1.24830785706625	10.0344557032756	5.16395959824273	0.000513926818547041	0.0072709432707706	-0.00562093724213053
TNC	287	57	0	A_23_P157865	NM_002160	TNC	1.24857290022864	14.1001579561042	4.7009125556737	0.000991847726207934	0.0106909611085425	-0.682384179412376
RPL27A	257	6	0	A_23_P416305	NM_000990	RPL27A	1.25301871687078	7.96247288443446	9.5163878204373	3.91944517454171e-06	0.00076396070620673	4.9246411616253
KRTAP1-5	27	64	0	A_33_P3254579	NM_031957	KRTAP1-5	1.25477551188779	6.95948531936662	4.40211136381496	0.0015411439239816	0.0140018969847925	-1.13561108980301
METTL12	82	132	0	A_24_P804667	NM_001043229	METTL12	1.25490667396239	9.97361333774765	5.81886990887327	0.000213635359723101	0.00434601612711988	0.897040138873276
PLEKHF1	271	121	0	A_23_P79134	NM_024310	PLEKHF1	1.25660258479896	9.44392405229288	6.44484017030571	9.74749707171066e-05	0.00294312138768063	1.701004100434
AMOTL2	44	81	0	A_23_P166686	NM_016201	AMOTL2	1.26423682464418	12.9534143525774	7.03893796396062	4.84460824194403e-05	0.00212089917140634	2.4134289054176
FOXD4	280	63	0	A_32_P119248	NM_207305	FOXD4	1.26851300177952	8.16724481213146	6.58822958579559	8.20171593221857e-05	0.00268125231956972	1.87734848045878
SURF6	145	106	0	A_24_P21447	NM_006753	SURF6	1.2720867600945	8.63948184746794	5.07462841498759	0.000582026577920016	0.00783228081705416	-0.133708568676417
BAG1	5	88	0	A_33_P3290924	NM_001172415	BAG1	1.27400658670855	12.4151650560203	10.8065756643679	1.29899341167002e-06	0.000509204936228904	5.99072283745875
FAM86FP	74	43	0	A_33_P3339336	NR_024254	FAM86FP	1.27547427667295	9.41364254772443	6.12948702357598	0.000143810330475699	0.00358410178528065	1.3030176659566
XPOT	326	80	0	A_23_P340722	NM_007235	XPOT	1.28006684306332	12.6916706848237	3.97765530270165	0.00294553566070858	0.020591436909164	-1.80012343963471
MXD1	288	2	0	A_24_P379750	NM_002357	MXD1	1.28146866936334	8.02322298658309	8.22523614881103	1.35026293958143e-05	0.00129234804723312	3.70134004029237
GPR84	211	160	0	A_23_P25155	NM_020370	GPR84	1.28523431539262	6.51440646707301	8.02793510458404	1.65315185246057e-05	0.00140293254588244	3.49876389415519
RRP9	27	132	0	A_23_P6802	NM_004704	RRP9	1.28612789508507	13.0502408980911	5.14385195407003	0.000528472226075384	0.00741073850651871	-0.0343484184538037
WDR74	310	89	0	A_23_P36157	NM_018093	WDR74	1.28732850082558	12.3663778314671	6.84334078390205	6.07008360106767e-05	0.00234081282169328	2.18412637574647
ETS2	46	95	0	A_24_P314179	NM_005239	ETS2	1.28840384022997	7.15889590707108	8.29201088841587	1.26195061939322e-05	0.0012770618752178	3.76890738212511
VAMP1	8	135	0	A_23_P105545	NM_016830	VAMP1	1.28939515055926	7.0583288060433	5.75818500115487	0.000231159257175684	0.00455664798760207	0.81607743597941
LOC100506392	58	31	0	A_19_P00321183	lnc-LRIG2-4:3	LOC100506392	1.29218310424304	8.75113123580689	6.10342659564345	0.000148592643759329	0.00366021693650887	1.26949435296838
TRMT1	216	73	0	A_23_P16683	NM_017722	TRMT1	1.29456708592719	12.5426885298811	6.60829948865489	8.0075013873412e-05	0.00265601632655693	1.90180435971313
KRT80	15	146	0	A_24_P331704	NM_182507	KRT80	1.29498838749214	10.8148258735774	6.61576245282836	7.93656210251095e-05	0.00264694444006616	1.91088413150561
NOP2	251	137	0	A_23_P204364	NM_001033714	NOP2	1.29500900927635	11.813057387938	5.9585468205175	0.000178521282660339	0.00395585235551948	1.08133594362902
JMJD4	149	20	0	A_33_P3306113	NM_023007	JMJD4	1.29593906944097	11.8252687107345	6.85644870813385	5.97819946838788e-05	0.00232825801942533	2.19965172904667
PIGW	329	135	0	A_23_P379794	NM_178517	PIGW	1.29710221937221	8.72574269821503	6.29955141615053	0.000116417716401324	0.0032627118920685	1.51939548847299
FIBIN	193	154	0	A_33_P3325497	NM_203371	FIBIN	1.29808313014242	6.51470697900394	4.90115889145256	0.00074354942979134	0.00901512606059683	-0.385830078523848
POSTN	337	62	0	A_33_P3511265	NM_006475	POSTN	1.29941890704846	7.07527661706188	8.07688496223135	1.57163558184074e-05	0.00138723034023809	3.54943531748504
GRB14	27	146	0	A_23_P154526	NM_004490	GRB14	1.30495218480872	9.84558699465711	9.46168229680916	4.11854859368624e-06	0.000769829412429258	4.87618203675127
RDH10	135	100	0	A_32_P25050	NM_172037	RDH10	1.31195381321773	7.35528644092579	4.19594296625318	0.00210441182910231	0.0168352946328185	-1.45549511551718
C19orf48	79	98	0	A_33_P3288754	NM_001290149	C19orf48	1.31339266471374	13.7701956731383	5.04585694916647	0.000605974528902883	0.0079898118798415	-0.175215930320197
SLC25A19	96	104	0	A_33_P3350074	NM_001126121	SLC25A19	1.31437263027061	9.54242391039926	9.97817063803947	2.60356112686676e-06	0.00061739371915909	5.32274162171531
SLC1A4	53	94	0	A_24_P191312	NM_003038	SLC1A4	1.31502647124968	8.02737301724951	4.94023138257587	0.000703375096553008	0.00878555309279417	-0.328652612741365
PSAT1	110	155	0	A_21_P0010626	NM_058179	PSAT1	1.31612997135345	11.5199033644945	5.5962885013338	0.000285972635214278	0.00512916407769062	0.597420330369443
NGFR	36	22	0	A_23_P389897	NM_002507	NGFR	1.31991799409481	6.76887451646278	4.46667424948359	0.00139963696093413	0.0131894614681622	-1.03661873733279
TATDN3	168	95	0	A_33_P3249773	NM_001146171	TATDN3	1.32295700807795	8.76063123687625	5.15090765232493	0.000523318547384326	0.00735144569482066	-0.024261173057635
GLMN	170	69	0	A_23_P160742	NM_053274	GLMN	1.32433401605356	7.82748825479243	3.87421680063622	0.00346206402919286	0.0228659888334748	-1.96540848436666
CXCL3	151	92	0	A_24_P183150	NM_002090	CXCL3	1.32730544165726	7.49408159383831	6.35285143350966	0.000109040992827639	0.00316032352250873	1.58636465152403
CD274	88	104	0	A_33_P3381513	NM_014143	CD274	1.33320397821663	6.77946417765103	4.87163543534953	0.000775533996689629	0.00925051361817179	-0.42918326866315
ADAMTS5	269	39	0	A_33_P3372426	NM_007038	ADAMTS5	1.33452033322121	9.28986601101018	4.96262794603973	0.000681401110274476	0.00860697366748104	-0.295980015907952
ITPKA	348	23	0	A_23_P65918	NM_002220	ITPKA	1.33580692978372	12.7837879304767	5.93240469485178	0.000184586024490729	0.0040119052764825	1.04705990562092
GPATCH4	81	144	0	A_33_P3211268	ENST00000527691	GPATCH4	1.33694521876522	10.0635485120735	7.86234055685574	1.96505913257805e-05	0.0015010028605	3.32529223488847
RND3	74	145	0	A_23_P142849	NM_005168	RND3	1.33886891033922	13.689661134837	8.0972619443284	1.53900550241575e-05	0.00137369210238098	3.57044818146922
ZFAND2A	38	108	0	A_23_P336992	NM_182491	ZFAND2A	1.34169618872123	10.7708594088378	4.30157016085996	0.00179263990360635	0.015288250202675	-1.2909006502955
FAM196A	186	15	0	A_32_P202013	NM_001039762	FAM196A	1.34334418283262	8.44859888225596	7.51485858471809	2.85014977388975e-05	0.00170237517321656	2.95071461347193
ALPK2	65	13	0	A_23_P15876	NM_052947	ALPK2	1.34825616870983	9.05359848481868	9.88607699450453	2.82123872185788e-06	0.000653919071344036	5.24488167045881
DPH2	207	127	0	A_24_P393844	NM_001384	DPH2	1.35015822951975	11.0475961765754	7.67722584926882	2.39179661696357e-05	0.00158937526028201	3.12755202161568
OSGIN1	262	120	0	A_23_P77415	NM_182981	OSGIN1	1.35383513265292	9.47212044535502	5.23159776058866	0.000468072852120447	0.0069178990460369	0.0905691569524416
ADAMTS1	12	22	0	A_33_P3390013	NM_006988	ADAMTS1	1.35389658588467	9.19788873072528	3.55048275901373	0.00579082511521781	0.0318575586670986	-2.48987049195192
TMEM150A	268	87	0	A_24_P291401	NM_001031738	TMEM150A	1.36133993047673	8.21591252885485	4.79559996827713	0.000864888518684428	0.00982929097629342	-0.541426317566057
LOC153577	233	85	0	A_33_P3623118	lnc-MGAT1-1:1	LOC153577	1.36286146310466	7.4386263298599	5.87499258965291	0.000198701934324278	0.00416487642815847	0.971434167347564
CBX4	281	55	0	A_23_P89621	NM_003655	CBX4	1.36551014430225	8.92584083262254	4.66325016052301	0.0010477604550721	0.0110025235361438	-0.738812175503027
PUS1	310	60	0	A_24_P335358	NM_025215	PUS1	1.36811564752314	11.0112278065216	7.8056838423667	2.08609778010737e-05	0.0015487813799227	3.26520380397863
DRD5	200	144	0	A_32_P54274	NM_000798	DRD5	1.37010399396991	6.86222486294011	5.51141892261178	0.000320183314980019	0.00549100086428741	0.481240512295214
STYK1	10	86	0	A_23_P13822	NM_018423	STYK1	1.37023030162899	8.48530093228619	4.5243049947584	0.00128498380127351	0.0124714860321524	-0.948744240782224
MOCOS	23	30	0	A_23_P67042	NM_017947	MOCOS	1.37551452032711	9.46780840117112	4.90346750240033	0.000741108635033857	0.00900532215976683	-0.382445459533905
XLOC_013370	127	17	0	A_21_P0009773	lnc-BBC3-1:1	XLOC_013370	1.38130817194744	6.72258834202054	9.29569370403441	4.79374284025735e-06	0.000827858546152269	4.72741013234656
LOC100506469	41	66	0	A_21_P0000784	NR_038396	LOC100506469	1.38130887777869	7.36337936793451	3.56605359023138	0.00564768691262759	0.0313633169059165	-2.46442492216038
NLE1	53	85	0	A_33_P3361513	NM_001014445	NLE1	1.38179002845161	10.4722048428201	5.18698697281488	0.00049779585584328	0.00716603765277285	0.0272037117959849
MKNK2	175	111	0	A_24_P929754	NM_199054	MKNK2	1.39058398760691	12.2489315576338	5.9439343809971	0.000181884200058143	0.00399874726802146	1.06218924494015
FIGNL1	246	26	0	A_23_P302681	NM_001042762	FIGNL1	1.39275914734068	7.46033736693238	6.14038801085568	0.000141859592099009	0.00357694780298971	1.31701137822054
LIAS	381	109	0	A_23_P254081	NM_006859	LIAS	1.40100694538155	9.28081674643432	6.34381813105179	0.000110254652850068	0.00316341926485915	1.5750429264112
PNO1	109	116	0	A_24_P336853	NM_020143	PNO1	1.40336696877293	10.6479500038489	5.80653399477291	0.000217077789389656	0.00436679369299938	0.880626104038081
FLJ31715	132	44	0	A_33_P3777165	BC022164	FLJ31715	1.40966717677678	7.66342959829829	3.74522369512305	0.00424309240630575	0.0259685100737233	-2.17316028493307
GFOD1	55	104	0	A_23_P122662	NM_018988	GFOD1	1.41052293133094	9.62075382746963	7.64942878640333	2.46418849883056e-05	0.00158937526028201	3.0975049659414
SUN3	19	11	0	A_23_P329962	NM_001030019	SUN3	1.41301259629435	9.65030455635515	4.33129523491957	0.00171403167249566	0.0150124229396974	-1.2448472180497
XLOC_004195	78	102	0	A_21_P0003911	lnc-DCTD-1:1	XLOC_004195	1.41624251801361	8.6561955826336	6.99352193655786	5.10299951098751e-05	0.0021591989023726	2.36063677012045
PLCB2	320	62	0	A_33_P3260614	NM_004573	PLCB2	1.42533850528357	7.63230121160277	4.82484960724461	0.000829275346492941	0.00961684132998918	-0.498147804402713
TAF4B	30	106	0	A_33_P3358626	NM_001293725	TAF4B	1.43084537921374	8.36716426828564	9.01777585738859	6.21239161044785e-06	0.000933153579502172	4.47233438817829
ETS1	69	140	0	A_24_P751074	NM_005238	ETS1	1.43084558180447	7.91496816358269	4.43369135967097	0.00147011538143313	0.0135639913938499	-1.08711857254671
CDC25A	179	140	0	A_24_P397107	NM_001789	CDC25A	1.43816435288193	10.8294187486668	5.52222871062364	0.000315590492943615	0.00544419299879279	0.496097895563059
MYBBP1A	123	118	0	A_23_P78170	NM_014520	MYBBP1A	1.44393171889808	10.5684569934572	6.18177855230869	0.000134709704312791	0.00349716957863009	1.36998955057386
C9orf91	97	40	0	A_24_P915196	NM_153045	C9orf91	1.44605202604778	9.18660825106858	7.99859611608203	1.70421690178317e-05	0.00140293254588244	3.46826112897235
SLC7A6	325	92	0	A_24_P159312	NM_001076785	SLC7A6	1.4462794638577	7.97704138029638	3.77728571262642	0.00403309000076046	0.0250597316902941	-2.12136093098041
LOC100507047	63	44	0	A_21_P0014306	ENST00000567216	LOC100507047	1.44639412358112	7.76054120805359	7.72868049758154	2.26384156326448e-05	0.00158937526028201	3.18292614349391
XLOC_l2_001537	64	149	0	A_21_P0010813	ENST00000450890	XLOC_l2_001537	1.44843907950605	7.99160502426044	5.55038475017068	0.000303957844417257	0.00535067503130399	0.534714867755341
FRMD6	30	150	0	A_24_P330303	NM_001042481	FRMD6	1.45051063698526	10.1635582768236	6.5812016798232	8.27092902394083e-05	0.00269832690620887	1.86877163618305
METTL1	163	24	0	A_33_P3700794	NM_005371	METTL1	1.45062644486081	11.1263686371837	8.06257523934442	1.59500165523035e-05	0.00139778982486948	3.53465070990103
ADAM1	285	129	0	A_21_P0000668	NR_036636	ADAM1	1.45785518981282	9.48902483267715	7.63862639451504	2.49296341745353e-05	0.00158937526028201	3.0858029931479
GREM1	255	111	0	A_33_P3319870	NM_001191323	GREM1	1.45788938418379	12.5188948398233	7.23388490959428	3.88648836265205e-05	0.00191171910544321	2.63699414044798
SLC3A2	131	98	0	A_23_P75811	NM_001012662	SLC3A2	1.46092523279708	12.7809693586903	5.2647869899748	0.000447199448079874	0.00672158629525455	0.137518258716768
GFPT2	8	55	0	A_23_P144916	NM_005110	GFPT2	1.46250631675129	13.379953679377	5.0681947149669	0.000587292090923567	0.00786090711086237	-0.142979488589233
OLAH	26	156	0	A_23_P161458	NM_001039702	OLAH	1.46369523198791	7.18549576524019	5.09673689482413	0.000564315249308569	0.00768281120909558	-0.101897420902228
CRYAB	277	143	0	A_24_P206776	NM_001885	CRYAB	1.47186848496285	10.8132219959727	7.88067499215227	1.92754977261963e-05	0.00147946428924545	3.34465622922992
FUT1	119	136	0	A_23_P107963	NM_000148	FUT1	1.49068940130431	6.58452009926532	4.02530598377782	0.00273556005159816	0.0196396647536338	-1.72439775858115
GDF15	369	143	0	A_23_P16523	NM_004864	GDF15	1.4980218132423	14.7565071141223	3.99922207915066	0.00284846732265085	0.0201947562794631	-1.76581664044412
C4orf26	67	95	0	A_23_P386268	NM_178497	C4orf26	1.5144915873467	7.23479408547555	8.50934903000685	1.01553932368369e-05	0.00117772910764134	3.98542468703601
GDAP1L1	202	121	0	A_23_P17354	NM_024034	GDAP1L1	1.51703523051986	6.89482963468153	3.97660422604902	0.0029503546917154	0.0206135599568928	-1.80179680536443
SLC7A5	128	128	0	A_24_P335620	NM_003486	SLC7A5	1.51721880225139	10.8326715301965	5.45936887800951	0.000343329990316531	0.00571784788904512	0.40945691766387
C6orf105	116	140	0	A_23_P156826	NM_032744	C6orf105	1.51722747629756	7.79519273139873	5.77760491256326	0.00022538809508948	0.00448742613381159	0.842045521793674
EID3	168	118	0	A_23_P65068	NM_001008394	EID3	1.52075890291057	7.89669407931128	5.97380864335887	0.000175080611953043	0.00391234987722919	1.10130031961038
BPIFC	21	102	0	A_33_P3255384	NM_174932	BPIFC	1.52237828656861	6.7235171340837	7.959118664968	1.77566674262882e-05	0.00144451111460671	3.42706087567886
MICALCL	37	150	0	A_23_P2041	NM_032867	MICALCL	1.52406188005076	7.44380038856651	9.49947189453589	3.97986066585538e-06	0.00076396070620673	4.90968674719882
LOC401431	315	123	0	A_32_P146659	NR_027040	LOC401431	1.52418523791222	9.22819737392303	5.07683452694875	0.000580232723006998	0.00783228081705416	-0.130530995836616
TUBE1	52	146	0	A_33_P3240538	NM_016262	TUBE1	1.53071637126136	9.4944360508589	7.77929381157722	2.14523512194061e-05	0.00156346310171525	3.23708567932143
TMEM88	180	70	0	A_23_P77859	NM_203411	TMEM88	1.53516011370835	8.0853912380552	6.87622187740311	5.84244314963376e-05	0.0023090730537657	2.223028164884
TECPR2	62	136	0	A_32_P355396	NM_014844	TECPR2	1.53848022416099	7.95344744816408	4.3622802375449	0.00163597631595499	0.0145534108106903	-1.1969681720922
RCAN1	55	88	0	A_23_P166248	NM_004414	RCAN1	1.53996112680444	11.0420655942513	12.3373645852494	4.02702985091803e-07	0.000376361472184622	7.08740803515683
RPP40	6	56	0	A_23_P111297	NM_006638	RPP40	1.54479576825814	10.1885613441203	5.77359533153068	0.000226566774781239	0.00450105077705824	0.836688511016815
SIK1	384	148	0	A_23_P132121	NM_173354	SIK1	1.55395118098758	10.6589759058499	6.19688619469825	0.000132198071212267	0.00346062883110714	1.38926557637913
HSD17B6	58	37	0	A_23_P25030	NM_003725	HSD17B6	1.55535400490777	7.94015533245326	4.15749048867812	0.00223177023613124	0.0174157001530713	-1.51577323696668
TXNL4B	383	118	0	A_24_P399083	NM_017853	TXNL4B	1.55603709754362	8.57041297493568	4.69967237772431	0.000993637215720585	0.0107029885310974	-0.684239025423464
EPB41L4A-AS1	119	75	0	A_23_P58538	NR_015370	EPB41L4A-AS1	1.56738801318263	13.1421875518037	15.9018224494061	4.0900045295398e-08	0.000141219955575679	9.09959084493421
C1orf109	131	135	0	A_23_P45970	NM_017850	C1orf109	1.57525554210652	9.92126438736111	6.60238452035716	8.0642155304392e-05	0.00266021318519765	1.89460251647519
SERPIND1	333	131	0	A_33_P3241511	NM_000185	SERPIND1	1.58743314625801	7.53179757871489	5.75525778641577	0.000232042919297938	0.00456839888699584	0.812158372959574
XLOC_006513	23	43	0	A_21_P0005511	ENST00000439105	XLOC_006513	1.58902433973276	14.5852551211458	9.55703146336567	3.77835582511273e-06	0.00076396070620673	4.96046255401154
SERPINE1	38	112	0	A_24_P158089	NM_000602	SERPINE1	1.59136174683479	13.5119582430016	7.26327222782907	3.76090845541736e-05	0.00189693058856098	2.67027204495213
MYC	28	64	0	A_23_P215956	NM_002467	MYC	1.59998320059779	13.1072348586746	14.4491279989811	9.75146977334271e-08	0.000180548364332574	8.35796393936666
DACT1	56	54	0	A_23_P65518	NM_016651	DACT1	1.60242337483686	10.5042970551853	10.1872818040419	2.17462394034286e-06	0.00057584041940279	5.49678247645649
PPP1R15A	223	49	0	A_23_P90172	NM_014330	PPP1R15A	1.61175528631492	11.6942826737806	8.76526882941644	7.90714591636127e-06	0.00107374986597562	4.23387108586578
ST3GAL1	241	97	0	A_23_P31896	NM_003033	ST3GAL1	1.6199910158693	12.2618070631054	10.2503989517719	2.06088115032228e-06	0.000564539305453799	5.54857615412918
LOC388796	68	164	0	A_24_P608302	lnc-KIAA1755-5:7	LOC388796	1.62010073827016	10.0603939750207	7.48786112118151	2.93526181014248e-05	0.00172723850516828	2.92099832130127
SPHK1	241	43	0	A_33_P3222069	NM_182965	SPHK1	1.63379691379107	14.1929152683336	10.0205733505173	2.5095898970097e-06	0.000604126731571062	5.35833974038534
ACTR10	245	161	0	A_33_P3416946	NM_018477	ACTR10	1.63448953748338	7.79796270993093	4.78063242296943	0.000883742206377378	0.00996514987574434	-0.563621090299458
TRIB1	133	60	0	A_24_P252497	NM_025195	TRIB1	1.64940087119505	13.1089817864582	9.48569523268439	4.02981889277243e-06	0.00076396070620673	4.89748774792473
FERMT1	365	37	0	A_23_P131935	NM_017671	FERMT1	1.65213490983396	10.3120357026375	4.99774396456749	0.000648415991654595	0.0083552581309069	-0.24490169949525
SGK1	76	139	0	A_23_P19673	NM_005627	SGK1	1.65629528938275	11.4717056816817	9.13957818246273	5.54080513300329e-06	0.000889215272254104	4.58506192660548
ZDHHC11	58	106	0	A_24_P153456	NM_024786	ZDHHC11	1.66401032575381	7.92149796393766	6.09255490714812	0.000150638370449423	0.00369342967546362	1.25548044422543
NOP16	369	97	0	A_33_P3361257	NM_016391	NOP16	1.68000621884194	13.3230310073867	8.04299707288501	1.62758759819268e-05	0.00139778982486948	3.51438484901134
ITK	155	66	0	A_23_P354151	NM_005546	ITK	1.68379119750526	6.57331604659654	8.11811713638833	1.50637463005746e-05	0.00137081554699583	3.59190520988709
EREG	201	161	0	A_23_P41344	NM_001432	EREG	1.68468432053996	10.5276137726271	3.73707284870363	0.00429828826757568	0.0261451776398325	-2.18634519009424
KIAA0226L	375	44	0	A_23_P53763	NM_025113	KIAA0226L	1.69683775777165	7.76720716902932	5.59725911802689	0.000285604964888851	0.00512916407769062	0.598742828353543
CYR61	318	101	0	A_23_P46429	NM_001554	CYR61	1.69794264080342	13.8391706050847	8.18620849091917	1.40499193423598e-05	0.00132085868941664	3.66161834774669
XLOC_003526	81	69	0	A_21_P0003359	ENST00000507388	XLOC_003526	1.7324260829002	7.00477037064614	5.10143346312472	0.000560627823596013	0.0076711428236445	-0.0951490727447188
IFRD1	109	73	0	A_24_P137897	NM_001007245	IFRD1	1.76032770770731	10.9569404162321	10.0793025484232	2.38552874167071e-06	0.000601607629328004	5.40738527642226
C9orf150	276	14	0	A_33_P3375145	NM_203403	C9orf150	1.7655504764853	8.69169496189495	8.73043136866362	8.17830615497122e-06	0.00108665053689679	4.20045642731038
AMIGO2	305	105	0	A_23_P14083	NM_181847	AMIGO2	1.76944545779378	13.0026050308306	4.79106079854213	0.00087056035357918	0.00986552275154495	-0.548153811807266
MTHFD2	27	106	0	A_23_P120316	NM_006636	MTHFD2	1.77603747680638	12.5443317786492	9.19427662637727	5.26545258492063e-06	0.000862448563600195	4.63520757301905
PPP1R14C	205	63	0	A_23_P45011	NM_030949	PPP1R14C	1.78753430717529	7.61642593992643	3.64599551595925	0.00496884349231445	0.0287805269434532	-2.33410803222979
SPINK1	13	46	0	A_23_P214079	NM_003122	SPINK1	1.79553256525771	10.9113383108002	3.3698614332329	0.00775661463875202	0.0383796615946721	-2.78635684598895
ALDH1A3	44	140	0	A_23_P205959	NM_000693	ALDH1A3	1.80483915678605	14.3292642670572	9.01138366888395	6.25001972444665e-06	0.000933153579502172	4.46637756768097
FOXS1	111	155	0	A_33_P3283833	NM_004118	FOXS1	1.82212746432003	7.12096049087161	3.41856838430683	0.00716630913950792	0.0366221677737221	-2.70618486760772
ZNF469	53	138	0	A_32_P116556	NM_001127464	ZNF469	1.85274756343686	8.88870812178739	4.83235493300054	0.000820392417337998	0.00954201663738368	-0.487062945152132
PRR22	330	58	0	A_23_P372988	NM_001134316	PRR22	1.86103027426339	6.99108015251697	6.29395024309575	0.000117223800618416	0.00326745920039542	1.51233453103242
CD3EAP	360	116	0	A_23_P208310	NM_012099	CD3EAP	1.86376514935633	11.6244876276327	8.90684209008278	6.90220425977323e-06	0.000975633301581927	4.36837146813941
RRP12	298	85	0	A_23_P24192	NM_015179	RRP12	1.87424958197384	11.1090135110718	7.25658578678519	3.78908785255332e-05	0.00189992928827684	2.66271004875275
EFNB2	1	85	0	A_24_P355944	NM_004093	EFNB2	1.87521236258936	11.4653441419744	7.24461302942191	3.84012246707158e-05	0.00189992928827684	2.64915530517811
ECM2	100	143	0	A_23_P303671	NM_001393	ECM2	1.88917186331529	7.38795889808378	8.12499194985896	1.49578433430594e-05	0.00137081554699583	3.59896758330768
CXCL2	64	76	0	A_24_P257416	NM_002089	CXCL2	1.90187476257226	11.0739045689201	3.49204679080618	0.00636266940068358	0.033911469788011	-2.58553649975995
UBASH3B	364	98	0	A_33_P3409477	NM_032873	UBASH3B	1.90533683334924	7.99617277842976	8.95340500754716	6.6029474014872e-06	0.000953705711952988	4.41216001221428
CXCR7	46	49	0	A_23_P131676	NM_020311	CXCR7	1.91192276235815	8.74898350254891	3.57763267567133	0.0055436417481266	0.0310569041234963	-2.44551550803421
KRT75	272	39	0	A_23_P64854	NM_004693	KRT75	1.91733023337582	6.82298963432594	6.99506667955293	5.09396843406951e-05	0.0021591989023726	2.36243684220236
CLDN14	366	55	0	A_23_P91512	NM_144492	CLDN14	1.93225191917378	7.14659405914065	10.711589447277	1.40346765245691e-06	0.000510729406027726	5.91698094688539
MKI67IP	171	33	0	A_23_P50897	NM_032390	MKI67IP	1.94236192821822	11.5907482348625	8.54928710988762	9.76263652312734e-06	0.0011721417417096	4.02465442092229
C7orf40	356	158	0	A_24_P506977	NR_003697	C7orf40	1.9751764081329	11.8609208785539	10.9503390414816	1.15675736977249e-06	0.000500306947507714	6.10098898137147
KLHDC7B	233	120	0	A_24_P117410	NM_138433	KLHDC7B	1.98699417024874	8.57009452667418	6.18540003667749	0.000134102958614861	0.0034871158862077	1.37461322196511
LMCD1	202	58	0	A_23_P6771	NM_014583	LMCD1	2.0115207365089	9.65876972427609	6.99420024426166	5.099031756284e-05	0.0021591989023726	2.36142723326387
FOLR3	183	64	0	A_24_P252996	NM_000804	FOLR3	2.04486334988152	7.72437380429133	5.74959739624403	0.000233762036314409	0.00457497573054201	0.804576446937779
NGF	383	100	0	A_23_P115190	NM_002506	NGF	2.04667560089047	7.54174512391047	5.82138606196582	0.000212940479524587	0.00434091467694651	0.900385357243918
LOC100128881	73	101	0	A_33_P3294372	NR_036480	LOC100128881	2.04952314086437	7.29966220405402	9.48316543847613	4.03906717783014e-06	0.00076396070620673	4.89524572062051
IL1A	2	97	0	A_23_P72096	NM_000575	IL1A	2.0773951363397	7.24980333325297	8.51803320455949	1.00685434915395e-05	0.0011762427867175	3.99396941181994
FLJ45684	166	60	0	A_33_P3288219	AK127589	FLJ45684	2.08391248897351	8.42691076397901	11.4736913328985	7.66707068459745e-07	0.000413108968314599	6.48918616721167
MSC	163	40	0	A_23_P256948	NM_005098	MSC	2.09690780359547	9.93736563152787	11.3053848887851	8.73532677985387e-07	0.000433708974619745	6.36655647517472
SH2D5	371	88	0	A_24_P686965	NM_001103161	SH2D5	2.14941480108495	10.2175550407066	8.70552137599462	8.37843266214545e-06	0.00108665053689679	4.1764861437924
DDIT3	40	18	0	A_23_P21134	NM_004083	DDIT3	2.24482048516233	11.4621560736701	7.52139744604561	2.82994279468837e-05	0.00170237517321656	2.95789847362572
FGF2	156	106	0	A_33_P3419696	NM_002006	FGF2	2.25248126395031	9.94241185125114	10.3275665854252	1.93060535389857e-06	0.00054774031897751	5.61144199014653
PMEPA1	237	63	0	A_24_P413126	NM_020182	PMEPA1	2.29808203653595	11.6578627134586	6.34342594483482	0.000110307675463571	0.00316341926485915	1.57455112637298
GBP1	238	97	0	A_23_P62890	NM_002053	GBP1	2.34274490996119	8.78560231868516	6.12761021712616	0.000144149108811325	0.00358410178528065	1.30060666635778
SESN2	293	30	0	A_23_P35082	NM_031459	SESN2	2.36512032707367	10.6814152581287	7.31507644584899	3.5501676160125e-05	0.00188645695930457	2.72866752555024
CTH	23	163	0	A_23_P126103	NM_001902	CTH	2.3687469870667	10.2284122313533	5.91967504656914	0.000187619565828217	0.00404986483420179	1.03033343050959
DIRC3	249	27	0	A_33_P3315134	NR_026597	DIRC3	2.47451736766282	8.30347159540833	7.59338424378249	2.61752406524938e-05	0.0016308714646542	3.03663946496111
TUFT1	221	129	0	A_23_P371824	NM_020127	TUFT1	2.49378999074685	10.8100827416293	7.61966276759373	2.54436869346225e-05	0.00160416388102096	3.06522595261288
IL6	215	81	0	A_23_P71037	NM_000600	IL6	2.53248650386976	11.2469974476096	5.49752388969283	0.000326193123596152	0.00553750398570682	0.462117056613482
VDR	39	147	0	A_23_P162589	NM_001017535	VDR	2.533533111991	11.4790092160117	4.19118617008771	0.00211974061801691	0.0169174729357078	-1.46294161322028
LOC284561	375	77	0	A_33_P3672756	XR_110828	LOC284561	2.53842118915834	7.8873737921294	10.533143000383	1.62561228476241e-06	0.0005222848892011	5.77649922837166
KRT34	180	121	0	A_23_P101054	NM_021013	KRT34	2.54761753849803	9.69381652854017	11.8789111215286	5.6387381919848e-07	0.000413108968314599	6.77617454241261
IL11	225	124	0	A_33_P3243887	NM_000641	IL11	2.59154615310521	11.2531117557845	4.94357985457696	0.000700042072741558	0.00877150508810557	-0.32376306602671
CHAC1	126	44	0	A_33_P3376965	NM_024111	CHAC1	2.9166010629153	10.1317045600398	6.12602992351248	0.000144435034710923	0.00358559973669866	1.2985761829239
TRIB3	350	35	0	A_23_P210690	NM_021158	TRIB3	3.36836845151766	14.358033170587	10.2788622957025	2.011738110491e-06	0.00056074552806107	5.5718226256902

## Sheet: 0.22 x control
Gene symbol	Row	Col	ControlType	ProbeName	SystematicName	Symbol	logFC	AveExpr	t	P.Value	adj.P.Val	B
Down-regulated genes
C18orf25	220	6	0	A_23_P345361	NM_145055	C18orf25	-1.00017807191348	8.67227816123564	-6.1661763665639	0.000115158535213662	0.00186680862647166	1.47834995396274
MFAP4	314	73	0	A_23_P164057	NM_002404	MFAP4	-1.00109457924584	12.6772832262441	-5.23793952851991	0.000404854191149062	0.00399622058828041	0.186643482961768
SNORD116-19	34	98	0	A_33_P3280157	NR_001290	SNORD116-19	-1.00119458141207	8.95969100386301	-3.34060450084336	0.00768295655614136	0.0288982554230659	-2.82422338965984
FAT4	52	69	0	A_23_P18649	NM_001291303	FAT4	-1.00180705517012	6.3118954317595	-3.83795488006417	0.00339440065835627	0.0162960578004487	-1.99521897963594
BEST4	268	13	0	A_33_P3244808	NM_153274	BEST4	-1.00187868613856	7.52776936621414	-4.5530599375044	0.00110687845122869	0.00759451734720708	-0.847648470819508
LOC100506740	230	71	0	A_21_P0014150	NR_110889	LOC100506740	-1.00252802339356	6.26834323071948	-5.42562639642686	0.000310952795093644	0.00338830211406128	0.458087129269216
SRI	287	97	0	A_23_P59718	NM_003130	SRI	-1.00260057435933	8.26038485622679	-5.15516020247726	0.000455552303231889	0.00427792887234501	0.0652641815840722
PPP2R5E	12	74	0	A_23_P3042	NM_006246	PPP2R5E	-1.00274085993391	11.2878727418415	-7.0472930796378	3.87842764227602e-05	0.00107048031753655	2.59030654767079
ADAM10	115	24	0	A_23_P48886	NM_001110	ADAM10	-1.00290236399485	9.20009671874843	-3.84943368098845	0.00333211412055568	0.0161016423128808	-1.97633116350018
PDS5B	29	60	0	A_23_P205098	NM_015032	PDS5B	-1.0032006067589	8.44450093462748	-4.72088031330141	0.000859726536125613	0.0064604483350922	-0.587974396270387
HCFC1R1	211	63	0	A_33_P3350207	NM_017885	HCFC1R1	-1.00336254719217	11.5525790867252	-3.52828686391405	0.00562725710961998	0.0233980949049872	-2.50926721074104
STIL	16	95	0	A_24_P214231	NM_001048166	STIL	-1.00343901876828	6.80791588505836	-6.23816873433826	0.000104972094144104	0.00178259950697923	1.57327360812726
CLINT1	166	161	0	A_23_P133345	NM_014666	CLINT1	-1.0038605014229	9.98755447645146	-4.43071866155356	0.00133412844182827	0.00867834662726166	-1.03939949309885
DNAJC3	209	71	0	A_33_P3462960	NM_006260	DNAJC3	-1.00410186653674	9.27608156550278	-5.79294896810968	0.00018820573062668	0.00247264926380903	0.974218823538357
SCARNA13	104	14	0	A_33_P3338360	NR_003002	SCARNA13	-1.00493675148766	6.8557570594533	-3.09492432276166	0.0116032283192969	0.0390264850739284	-3.23870091403001
TPX2	383	137	0	A_23_P68610	NM_012112	TPX2	-1.00503383358261	11.2107692413467	-4.63860476058551	0.000972618788213087	0.00700191312441009	-0.714789840257015
OXR1	130	24	0	A_19_P00320288	NM_018002	OXR1	-1.00540740553586	7.92660348189817	-6.40265738064547	8.51676469980734e-05	0.00160680388600329	1.78738383373832
C12orf65	263	127	0	A_32_P11894	NM_152269	C12orf65	-1.00549049508804	9.84495897510084	-4.92728336713518	0.00063357580539254	0.00531724903880822	-0.274085157165553
CCDC75	24	79	0	A_23_P339633	NM_174931	CCDC75	-1.00567433298673	7.71420318142667	-3.98008008532496	0.00270197611683372	0.0139399876526271	-1.76232058689637
GGH	274	83	0	A_33_P3308105	NM_003878	GGH	-1.0057200678576	14.2544628354503	-6.67821555971816	6.04678183392851e-05	0.00135212534995188	2.13755735751329
SIAH1	14	93	0	A_23_P106798	NM_003031	SIAH1	-1.00614339160349	8.71972401287048	-3.10456236610929	0.0114161100215515	0.0385606197990727	-3.2224188557092
ALS2CR8	40	149	0	A_33_P3323218	NM_024744	ALS2CR8	-1.00617524868828	6.63781736637803	-5.1339897665417	0.000469581525543646	0.00437040357737025	0.0340593380694409
LOC100287063	337	119	0	A_21_P0013986	ENST00000418195	LOC100287063	-1.00661040478343	7.54568458560329	-5.76584327414	0.000195184860272786	0.00253238675022146	0.936813371501025
BUD13	47	32	0	A_23_P52826	NM_032725	BUD13	-1.00662976765615	9.57048686621033	-4.15695558295623	0.0020415539818462	0.0115279511816074	-1.47560606554816
MOB1A	4	23	0	A_23_P108922	ENST00000396049	MOB1A	-1.00737605292469	7.5622352914748	-5.62288892548783	0.000236904705119676	0.00282443716262688	0.73774621785267
INSIG2	189	100	0	A_24_P944458	NM_016133	INSIG2	-1.0074312279623	9.7551073658575	-4.22458642252149	0.00183611496216322	0.0107212895740193	-1.36696098385842
KDM4C	9	57	0	A_23_P112201	NM_015061	KDM4C	-1.00768541837994	8.39899932541965	-6.50665134303303	7.47563978854266e-05	0.00151072713620267	1.92077938527079
XLOC_014097	294	54	0	A_21_P0010322	lnc-WDR4-1:1	XLOC_014097	-1.00769887084736	6.67468006296054	-4.05363439701595	0.00240350775917097	0.0128538675790897	-1.64264969561389
TRIB2	267	38	0	A_24_P396753	NM_021643	TRIB2	-1.00803953411399	6.84952145201932	-4.93401727987308	0.00062736258725385	0.00528464446922282	-0.26394816399975
ALDH6A1	371	11	0	A_23_P128967	NM_005589	ALDH6A1	-1.00843612808897	9.33908997977218	-4.99046223470608	0.000577769495896098	0.00499222082820428	-0.179237870111901
AMY1C	52	13	0	A_23_P23611	NM_001008219	AMY1C	-1.00851134197337	6.78076622601988	-4.40207125732647	0.00139418380451677	0.00891239754391589	-1.08459101687407
SRPX	120	83	0	A_23_P96383	NM_006307	SRPX	-1.00854121946271	13.8585286883527	-4.49241445415695	0.00121390769925117	0.00811170812748705	-0.94244710496283
CD109	153	27	0	A_23_P331928	NM_133493	CD109	-1.00899820520716	12.2632862633705	-3.67540478249682	0.00441981472911557	0.0196136958283985	-2.26403409759789
CLTC-IT1	52	162	0	A_21_P0013966	lnc-DHX40-1:1	CLTC-IT1	-1.00909946687945	6.46030808875679	-3.98995802559363	0.0026597249416251	0.0137894980421593	-1.74621416827534
KIAA0754	62	116	0	A_24_P912372	NM_015038	KIAA0754	-1.01060939805861	6.48603825018743	-2.9420033746759	0.0150287732084214	0.0471851362380498	-3.49698608265747
DKFZp686O1327	357	93	0	A_33_P3867461	NR_033870	DKFZp686O1327	-1.01133314490422	14.8849014024384	-5.56356182303076	0.000256950506786774	0.002987116882457	0.654244781185699
WRB	168	106	0	A_23_P80122	NM_004627	WRB	-1.01226114255114	9.9406014535811	-5.4882081040743	0.000285077751565765	0.00320020907232754	0.547434243960927
SERINC3	223	54	0	A_23_P79836	NM_006811	SERINC3	-1.01305998857558	11.9397953466059	-6.79787131287555	5.22650788238408e-05	0.00125008938128824	2.28635221761269
STRADB	58	127	0	A_33_P3301970	NM_018571	STRADB	-1.01327883806001	9.92832606350539	-6.17347096757494	0.000114079378418141	0.00185784887243341	1.48800189885972
UNC119	31	6	0	A_23_P49842	NM_005148	UNC119	-1.01433683551101	9.39996616416478	-4.38079684725261	0.00144063261820553	0.00909761136720465	-1.11822197528071
METTL14	14	88	0	A_23_P110243	ENST00000388822	METTL14	-1.0147850471096	8.05902524841912	-4.38347301526507	0.00143470064792525	0.00907735590345107	-1.11398815822979
VPS29	112	15	0	A_24_P175989	NM_016226	VPS29	-1.01541521116481	10.4174048471211	-4.3999038517494	0.00139884254211851	0.00893370676712721	-1.08801455257299
ANKRD36B	156	24	0	A_21_P0011938	NM_025190	ANKRD36B	-1.01547704307698	7.40644517951613	-4.50100436493462	0.00119810282934164	0.00803833871687568	-0.928989193296879
IL13RA1	126	142	0	A_24_P280113	NM_001560	IL13RA1	-1.01731076281119	11.2917685184168	-6.79073241557969	5.27190545445054e-05	0.00125643308963793	2.2775294905933
LOC100652897	132	162	0	A_21_P0014870	ENST00000552477	LOC100652897	-1.01823354165748	8.04678839597845	-5.39454369181019	0.000324731087792388	0.0034887078977718	0.413494678487522
TMEFF2	352	122	0	A_23_P125383	NM_016192	TMEFF2	-1.01862803708625	6.4443754159279	-4.27786233838772	0.00168968806103428	0.0101144496617931	-1.28177708227269
UNC50	360	95	0	A_23_P252700	NM_014044	UNC50	-1.01877373911256	12.047492309538	-6.01483533301945	0.000140223836622105	0.00208013258618668	1.27637011069965
PPP1CB	228	10	0	A_24_P405298	NM_002709	PPP1CB	-1.01958043350495	10.5037094057618	-6.54843272064259	7.09684924145321e-05	0.00147414478196221	1.97394753712328
H6PD	306	58	0	A_24_P626850	NM_004285	H6PD	-1.0200060710386	6.33746877874149	-6.55209491073667	7.06465122146474e-05	0.00147414478196221	1.97859621174179
DNAJC22	238	85	0	A_32_P407245	NM_024902	DNAJC22	-1.02010754502443	7.69114342121031	-3.4753191740062	0.00614198153359944	0.0248046716044201	-2.59794362402235
APLP1	200	108	0	A_23_P27983	NM_005166	APLP1	-1.02025059238215	8.75836493938431	-5.5301410852345	0.000269039199582877	0.00307191502799942	0.606976285357598
HPSE	17	124	0	A_21_P0000064	NM_006665	HPSE	-1.02048626063548	6.57604542553908	-6.10837091905392	0.000124110055326952	0.00194136094994525	1.40159321941746
EVI2A	16	82	0	A_23_P78092	NM_001003927	EVI2A	-1.02069730834014	8.47757865495255	-3.1036576755271	0.0114335421446332	0.0385882047381372	-3.22394717416679
ATP11B	177	133	0	A_23_P212522	NM_014616	ATP11B	-1.02117312782198	8.64836154471036	-3.0163728320887	0.0132500500203752	0.0430529711896685	-3.37140400702807
DLGAP5	15	137	0	A_23_P88331	NM_014750	DLGAP5	-1.02118532283079	10.4507905754325	-4.15860783876993	0.00203625594356971	0.0115128126607816	-1.47294513838542
PIP4K2C	171	26	0	A_23_P162199	NM_024779	PIP4K2C	-1.02126749001527	8.48151349334984	-7.46229104754329	2.39927635672359e-05	0.000865141662914683	3.07798329330919
PARD6G	127	140	0	A_24_P74070	NM_032510	PARD6G	-1.02182517230843	7.37504536169425	-4.84670130543585	0.000713239371215617	0.00568509793544544	-0.395901105146688
SP140L	326	124	0	A_23_P337753	NM_138402	SP140L	-1.02216839402982	6.55519785576507	-6.88429555808171	4.70927461999364e-05	0.00116917743508903	2.39261477507635
RSPRY1	319	95	0	A_33_P3327454	NM_133368	RSPRY1	-1.02292653017861	11.6742014122873	-6.00335831532152	0.000142351450652091	0.00210316810720279	1.26091760282202
ZDHHC13	276	116	0	A_23_P13065	NM_019028	ZDHHC13	-1.02378423089936	8.68656476168386	-7.15928221438259	3.40036707298062e-05	0.00100974536664499	2.72409924593032
STXBP4	4	75	0	A_23_P375566	NM_178509	STXBP4	-1.02585589943872	6.21123938705078	-5.26582388352943	0.000389165483087995	0.00390548661612224	0.227301907624232
ITGA1	322	125	0	A_33_P3353791	NM_181501	ITGA1	-1.0266111044129	8.53718846990106	-4.85811198295089	0.000701337437586723	0.00562792888861138	-0.378594450489699
NKTR	96	155	0	A_23_P212002	NM_005385	NKTR	-1.02667706503772	9.55199722487005	-3.06885135786904	0.012125298600308	0.0402702052198028	-3.28274912758423
CASP1	211	108	0	A_23_P202978	NM_033292	CASP1	-1.02691439154801	8.1529827182001	-4.26068056910403	0.00173551482098386	0.0103157332601267	-1.30921023051119
ZNF518A	74	91	0	A_23_P35576	NM_014803	ZNF518A	-1.02718479471588	6.06603123979857	-7.2780509789958	2.96227769638822e-05	0.00094677756173598	2.86420911332464
ZNF236	83	6	0	A_23_P55601	NM_007345	ZNF236	-1.02796348155353	7.18960129955911	-5.56999369435606	0.000254691689236956	0.00297262031770997	0.663322678052809
NUDT12	258	163	0	A_23_P259090	NM_031438	NUDT12	-1.02867803131953	7.51152859041851	-3.17569987245853	0.0101271846110204	0.0353021068079071	-3.10227175268575
UGT8	156	116	0	A_24_P103264	NM_003360	UGT8	-1.03087134242595	7.22042873496304	-3.41710394982662	0.00676438025660379	0.0264401245177763	-2.69560679968565
KIF23	59	162	0	A_23_P48835	NM_138555	KIF23	-1.03164075330659	10.188554820229	-3.94288548494273	0.00286750363053882	0.0145595071567041	-1.82306402200357
TRIM16L	227	128	0	A_23_P129903	NM_001037330	TRIM16L	-1.03190160236044	12.5347277776835	-5.77582157204763	0.000192583800860777	0.00250840777055488	0.950595846892297
ZBTB1	232	159	0	A_24_P64918	NM_014950	ZBTB1	-1.03204055349604	7.29022591001917	-3.86584547772818	0.00324513203942181	0.0158535644119437	-1.94934937127328
ITM2C	150	58	0	A_24_P379820	NM_030926	ITM2C	-1.03216281991726	10.7020815298462	-3.69144820342142	0.00430555346240248	0.0192605303786689	-2.23739616250256
TMEM107	103	159	0	A_24_P284353	NM_032354	TMEM107	-1.03280841958921	10.9730182166091	-3.33865029404383	0.00770804272113443	0.0289478283150573	-2.82751263186657
PDZD8	120	119	0	A_23_P321452	NM_173791	PDZD8	-1.03311379501848	8.33157916668102	-5.5902353585134	0.00024772111227517	0.00291439689928817	0.691851620650455
PALB2	60	19	0	A_23_P129569	NM_024675	PALB2	-1.03370637739963	7.00234149520541	-6.07960593752562	0.000128841760750294	0.00198613534640147	1.36321819890155
HIST1H4I	336	58	0	A_24_P20873	NM_003495	HIST1H4I	-1.03419406974439	8.04166711530066	-3.4486436892149	0.00641946544569364	0.0255231204916015	-2.64267021917308
IL7	249	36	0	A_23_P8961	NM_000880	IL7	-1.03430074241609	6.93283253215984	-5.85517853290429	0.000173178516837997	0.00236022343033816	1.05968618396613
MTCH2	147	100	0	A_24_P934563	NM_014342	MTCH2	-1.03442973303838	9.64921009564996	-4.75377266762235	0.000818572308799315	0.00624958574348661	-0.537543770986513
SMARCC1	257	21	0	A_23_P83453	NM_003074	SMARCC1	-1.03486269437726	8.93173746553131	-6.43763172527764	8.15011564679571e-05	0.00156983645485298	1.83241561326075
SMAD9	37	116	0	A_24_P655849	NM_001127217	SMAD9	-1.035305573427	9.69590207278102	-7.37173675611959	2.65991843596413e-05	0.000913640849994359	2.97345100145213
GCFC1	11	119	0	A_23_P211056	NM_013329	GCFC1	-1.03548211928389	6.9833338600982	-3.24435611261688	0.00902458738413135	0.0325342136403904	-2.98640532470373
LOC100653257	258	52	0	A_21_P0014918	NR_109773	LOC100653257	-1.03613454080748	7.3809526006188	-5.35966948764948	0.000340973691115902	0.0035815136950188	0.363292076222975
MAP9	292	51	0	A_33_P3275381	NM_001039580	MAP9	-1.03636284583155	8.97210703250011	-6.3052351344059	9.63537711593048e-05	0.00172050922330705	1.66103587164968
ROCK2	176	92	0	A_33_P3257140	NM_004850	ROCK2	-1.03685235718113	7.73431758520585	-5.93291640391147	0.000156196443174994	0.00222589952681969	1.16565564985425
CCNG2	7	133	0	A_24_P12065	NM_004354	CCNG2	-1.03849413689478	7.08624134966552	-2.96023551404403	0.0145713925912181	0.0462019088650747	-3.4662084423887
UBE2C	9	38	0	A_24_P297539	NM_181801	UBE2C	-1.03937056419957	12.6168393735928	-4.25571211465785	0.00174900999307179	0.0103652641318331	-1.31715004648889
GMEB1	15	73	0	A_23_P137586	NM_006582	GMEB1	-1.03938356865802	7.94351812560031	-7.1798701250784	3.31964782089949e-05	0.000998231282461455	2.74851729396569
MOSPD2	168	27	0	A_23_P406986	NM_152581	MOSPD2	-1.03968246511215	8.86529732176331	-3.45254909282655	0.00637804218888506	0.0254430440546019	-2.63611936834879
EXOC4	142	132	0	A_24_P7946	NM_001037126	EXOC4	-1.04006610760159	6.56057191979445	-5.92974721062639	0.000156852519882861	0.0022281663234628	1.16135279462551
RAB8B	169	57	0	A_23_P317465	NM_016530	RAB8B	-1.04019292969761	8.53432807498214	-6.44193683288761	8.10617628065342e-05	0.00156478320578685	1.83794683684701
SIKE1	304	34	0	A_33_P3383261	NM_001102396	SIKE1	-1.04064332925877	8.80894503007433	-6.58059627953083	6.81940115169524e-05	0.00144351211926418	2.01471136038127
SRP54	382	120	0	A_23_P162945	NM_003136	SRP54	-1.04069626962798	9.06282563261982	-3.36479464688794	0.00737931654614735	0.0280909608875552	-2.78352193753771
PIK3CA	76	101	0	A_21_P0012238	NM_006218	PIK3CA	-1.04079747176847	7.82484173698804	-4.02540201053213	0.00251374734260766	0.013239493196491	-1.68851077143747
RALBP1	93	110	0	A_23_P376599	NM_006788	RALBP1	-1.04105983671123	10.5460556228257	-7.10454128411253	3.62553289608885e-05	0.00104310900663889	2.65890580231024
PAPLN	43	75	0	A_23_P333640	NM_173462	PAPLN	-1.04168822510949	7.9843110579889	-3.81320432522725	0.00353288789407558	0.0167568780908227	-2.03598930495809
XLOC_008752	47	80	0	A_21_P0006976	ENST00000455612	XLOC_008752	-1.04238348839637	7.2165049520576	-4.23370548322979	0.00181013055037481	0.0106207092525159	-1.35235502736434
XLOC_l2_004854	67	27	0	A_21_P0011358	TCONS_l2_00008962	XLOC_l2_004854	-1.04251667112492	7.28104686632378	-3.91689488843696	0.00298946620024757	0.0149625602284097	-1.86559853602108
USP15	227	62	0	A_23_P204269	NM_006313	USP15	-1.04297660841839	9.04327488462462	-6.97261663734189	4.23746607894847e-05	0.00111368369503239	2.50017371941585
BCL9	15	134	0	A_23_P382602	NM_004326	BCL9	-1.04360201108155	6.37012525190577	-5.32614853424808	0.00035740945164327	0.00368445795478046	0.31486738867557
CDHR4	82	115	0	A_33_P3396537	NM_001007540	CDHR4	-1.04371699592129	7.05358553777442	-3.06989185557232	0.0121040112651704	0.0402178180718521	-3.28099126710318
CCDC47	287	146	0	A_24_P61864	NM_020198	CCDC47	-1.04403919051201	8.85511511474014	-3.87263797635352	0.00320983120930442	0.0157226045621295	-1.9381901770761
ARHGAP11B	249	58	0	A_33_P3339375	NM_001039841	ARHGAP11B	-1.04440389426608	7.9341192817211	-5.25481336620644	0.000395281164918251	0.00393412932480555	0.211261139403528
SRGAP2P2	360	78	0	A_33_P3372705	NM_001271870	SRGAP2P2	-1.04472773227677	8.43171341079523	-4.93389999834061	0.000627470241918646	0.00528464446922282	-0.264124658985008
LOC100506302	304	6	0	A_21_P0014175	NR_126344	LOC100506302	-1.04487119388426	6.2514829143378	-4.81104756861255	0.000751836130195179	0.00588296763406364	-0.450098310299888
TMTC3	92	77	0	A_24_P944222	NM_181783	TMTC3	-1.04503680889044	7.25742402801174	-5.03237544561993	0.000543659406411169	0.00481233902837601	-0.116637583012979
FAM160B1	36	6	0	A_33_P3299766	ENST00000369246	FAM160B1	-1.04537972250198	6.85030959091514	-4.43652210600804	0.00132229969377987	0.00862750369250238	-1.03025783184268
INTS3	94	23	0	A_23_P126757	NM_023015	INTS3	-1.04653951694498	8.63326190240039	-4.77880140151805	0.000788663980954772	0.00608538826249447	-0.499272963409046
HERC4	178	54	0	A_33_P3216994	NM_001278187	HERC4	-1.04743817392228	9.28573698248154	-3.45445173142555	0.00635796199028585	0.0253815693257062	-2.63292824724725
MIR143HG	228	124	0	A_21_P0004312	ENST00000519898	MIR143HG	-1.0477083094154	6.37341359282745	-3.25143702151232	0.00891812197035396	0.032234105858999	-2.97446255914901
KLHDC1	214	157	0	A_23_P422766	NM_172193	KLHDC1	-1.04899265734613	6.19339246737546	-4.14828277497924	0.00206960317672628	0.0116360173206491	-1.48957888114584
CPNE3	354	9	0	A_24_P64126	ENST00000614678	CPNE3	-1.04926319883802	9.70645882157804	-4.70838326473649	0.000875935122605202	0.0065172859345601	-0.607175176636937
ANKRD20A2	263	164	0	A_21_P0010770	NM_001012421	ANKRD20A2	-1.04970434268321	6.63517571932237	-4.50366915607546	0.00119324426991706	0.00801865925475933	-0.924816272372608
HTRA1	97	51	0	A_23_P97990	NM_002775	HTRA1	-1.05046314691664	14.9132155889329	-4.89534951796133	0.000663947669546015	0.0054566868411283	-0.32224698846509
FST	188	113	0	A_23_P110531	NM_013409	FST	-1.05050910575328	9.45909586287181	-6.07395354363008	0.00012979422795865	0.00199131039183157	1.35566334912894
ATP6V1G1	230	119	0	A_23_P20882	NM_004888	ATP6V1G1	-1.05053744546261	12.8083724823818	-5.64154565024188	0.000230953474573698	0.00277995226367286	0.763897412323953
UBE2V2	17	71	0	A_33_P3333810	NM_003350	UBE2V2	-1.05070126380874	9.58008198685294	-6.24026185902073	0.000104690878903261	0.00178145592609748	1.57602234342252
FAM82A1	156	33	0	A_24_P131392	NM_144713	FAM82A1	-1.05079273651657	7.64869595226072	-4.86911236204898	0.000690063777727179	0.0055804720743481	-0.361927904744928
MAN1C1	209	70	0	A_24_P237778	NM_020379	MAN1C1	-1.05104973120273	8.7507857134098	-5.87806784540257	0.000167980628713259	0.00232004730809036	1.0909799298408
C1QTNF3	16	79	0	A_23_P122068	NM_181435	C1QTNF3	-1.0510576446203	5.83879860604181	-3.3710787528571	0.00730248421065358	0.0278954561947439	-2.77295304603895
VGLL4	90	92	0	A_24_P410582	NM_014667	VGLL4	-1.05182403911934	9.52256203125319	-6.77834429660027	5.35170052877949e-05	0.00126101809206418	2.26220301884116
NUF2	85	101	0	A_23_P74349	NM_145697	NUF2	-1.05185830464834	8.55740999225896	-3.64800474803474	0.00462232803861817	0.0202853958891834	-2.30957841673487
DAD1	3	64	0	A_23_P106056	NM_001344	DAD1	-1.05278224698978	12.7639576026952	-6.78592233799546	5.30273434147269e-05	0.0012578891543141	2.27158097801539
ERO1L	47	114	0	A_23_P106145	ENST00000555069	ERO1L	-1.05282707715638	11.6041051180319	-7.46637874010524	2.38818433999125e-05	0.000864392415025331	3.08267761585511
LINC00461	64	115	0	A_32_P127350	NR_024384	LINC00461	-1.05285405416212	7.52902133295648	-5.06122985034585	0.000521431202122608	0.0047065680367774	-0.0736912656439754
GLCE	240	96	0	A_23_P151870	NM_015554	GLCE	-1.05320639621537	6.68240219948645	-6.20152385632239	0.000110029837094619	0.00183243081466524	1.52504927117174
TMEM181	184	77	0	A_23_P331943	NM_020823	TMEM181	-1.05342856621307	10.9330321337472	-6.12210495381336	0.000121917287109382	0.0019214948779141	1.41987350134206
HEG1	324	109	0	A_32_P166693	NM_020733	HEG1	-1.05384766906774	12.8984526403665	-3.77894505366266	0.00373441097000112	0.0174262051398456	-2.09252112812985
CGGBP1	68	111	0	A_23_P363163	NM_001008390	CGGBP1	-1.05386937435144	9.00678988646952	-4.41179818581643	0.00137347769444286	0.00882546437517845	-1.06923446997396
BANF1	369	12	0	A_23_P47208	NM_003860	BANF1	-1.05548293625295	12.3928817504809	-4.02000415660924	0.00253542343145369	0.0133163366424321	-1.69728945010535
ENPP1	112	141	0	A_23_P156880	NM_006208	ENPP1	-1.05719547012492	9.91154955220296	-6.32196351574861	9.4325303975456e-05	0.00169718754418319	1.68282668876839
APOBEC3C	43	17	0	A_23_P120931	NM_014508	APOBEC3C	-1.05755249531432	8.70701021930528	-6.98647741577298	4.16819210801185e-05	0.00110923182631581	2.51695921648938
TTC32	6	69	0	A_23_P119857	NM_001008237	TTC32	-1.05876750895816	10.7841452332288	-4.79231701273589	0.000772999278227066	0.00600065003540759	-0.478643826587615
LOC653075	262	75	0	A_32_P76853	NM_001282484	LOC653075	-1.05878274150771	8.78563718484147	-3.56816630711707	0.00526940843327589	0.0223126610998564	-2.44262921957409
LOC728392	23	92	0	A_33_P3331491	NM_001162371	LOC728392	-1.05934323287691	13.0724677784362	-3.81114907494255	0.00354465058642232	0.0167852001475865	-2.03937751708133
C17orf85	381	15	0	A_23_P15669	NM_001114118	C17orf85	-1.05958474853494	7.12475511558904	-5.17013848793192	0.000445897722803442	0.00421339203867416	0.0873019255653613
EIF3A	289	131	0	A_23_P86550	NM_003750	EIF3A	-1.06079967871098	12.3885549102111	-4.68090825959171	0.000912724449979061	0.00670417840044144	-0.649466161232442
EFR3A	88	102	0	A_23_P71513	NM_015137	EFR3A	-1.06146027990601	11.7999002369291	-6.93835800882938	4.41409775685421e-05	0.00113176512189715	2.45857663310224
COQ10B	7	148	0	A_23_P102037	NM_025147	COQ10B	-1.06157721358441	9.00133108817764	-6.49897900262425	7.54754426338426e-05	0.00151470124229324	1.91098963734083
CD63	227	161	0	A_24_P270144	NM_001257389	CD63	-1.06189600741543	16.638628087934	-8.43741771257378	8.35029054122961e-06	0.000574592948596341	4.14083749241428
RNU1-5	367	50	0	A_33_P3267263	NR_004400	RNU1-5	-1.0620034001002	10.869788709891	-3.21050543713203	0.00955190788394621	0.0338852711751831	-3.04351826838475
XLOC_003305	6	148	0	A_21_P0002897	ENST00000488999	XLOC_003305	-1.06261216056055	5.62477988146431	-3.76823236795777	0.00379986577122971	0.0176328590203108	-2.11022125562413
FLJ32224	71	132	0	A_19_P00811533	NR_033967	FLJ32224	-1.06276728760327	7.05896646900062	-4.3914602774341	0.00141714944531643	0.00902796595693136	-1.10135756737429
SLC12A2	358	57	0	A_32_P25437	NM_001046	SLC12A2	-1.06354621206408	8.29422381061408	-5.92891994079463	0.000157024266987534	0.0022281663234628	1.1602293582006
BTBD10	240	107	0	A_23_P13438	NM_032320	BTBD10	-1.06377757224527	10.1612934369044	-6.70747955140654	5.83404044338851e-05	0.00132953871062119	2.17412839877103
H2AFV	280	23	0	A_23_P316487	NM_138635	H2AFV	-1.06491064684362	9.48154621840941	-4.21884464347437	0.00185267778077434	0.0107767471535268	-1.37616288721154
GBP2	296	123	0	A_23_P85693	NM_004120	GBP2	-1.06535134728478	6.98474271678168	-4.60864897255808	0.00101755058474237	0.00715549818118326	-0.761198150629708
KIAA1143	353	152	0	A_32_P54018	NM_020696	KIAA1143	-1.06548279325663	10.2907923498264	-5.17728023526763	0.000441371656909316	0.00418651977947622	0.0977979982829149
STAG1	205	88	0	A_23_P357365	NM_005862	STAG1	-1.0654830332146	6.8123592009752	-3.3905016707966	0.00707019570367577	0.0272833889802026	-2.74029905907555
DBP	296	87	0	A_23_P130753	NM_001352	DBP	-1.06673019945963	7.52085619402247	-3.44963264706902	0.00640894962867879	0.0255056597859914	-2.6410112741692
CREB1	175	164	0	A_23_P79231	NM_134442	CREB1	-1.0670418706068	8.41121322031089	-5.81194109643331	0.000183475913177679	0.00244428185961752	1.00036329958104
XLOC_012515	193	1	0	A_21_P0009331	NR_125805	XLOC_012515	-1.06788161504624	7.89666625685456	-3.91322166019432	0.00300713724987593	0.0150347837472038	-1.87161569324614
NRXN2	190	2	0	A_24_P261470	NM_138732	NRXN2	-1.06814053595513	10.08059745122	-4.52125440536106	0.00116170171831352	0.00786481764971931	-0.897302961245053
C5orf24	210	47	0	A_33_P3348797	NM_001135586	C5orf24	-1.06863059710688	9.616464674015	-6.74015404722889	5.60603643339957e-05	0.00129350361418287	2.21482311422704
TMED10	35	105	0	A_24_P917833	NM_006827	TMED10	-1.07101802876678	13.3833727686861	-6.36539850112791	8.92706703325252e-05	0.0016432708254912	1.73922094399266
GMCL1	15	58	0	A_23_P28375	NM_178439	GMCL1	-1.07142134222418	7.69471368665653	-4.33155726726367	0.00155453799746266	0.00956316414317961	-1.19628865611103
KIAA0494	13	87	0	A_24_P233917	NM_014774	KIAA0494	-1.07245387993929	11.1088588386816	-4.28327907105886	0.00167550723644193	0.0100729971316803	-1.27313627273705
LOC100506966	182	66	0	A_21_P0014213	A_21_P0014213	LOC100506966	-1.07278062194649	5.88119108178062	-5.19714556830644	0.000429038703194472	0.0041195134043324	0.126953990981
CSDE1	267	28	0	A_32_P73821	NM_001007553	CSDE1	-1.07286653283505	12.1713977200844	-5.49615715848774	0.000281960273274383	0.0031767227017949	0.558741408623204
GNG2	259	35	0	A_32_P208403	NM_053064	GNG2	-1.07413572723558	7.92093646715491	-5.71973725493783	0.000207704063587234	0.00262359097263462	0.872939213320869
ITGA7	342	1	0	A_23_P128084	NM_002206	ITGA7	-1.07458884334008	11.9836530022492	-5.68757976119065	0.000216945843195474	0.00268475046346385	0.828203426234853
IFI6	297	131	0	A_23_P201459	NM_022873	IFI6	-1.07481179679564	8.76372567166559	-4.97517216899647	0.000590776009500979	0.00507829594544727	-0.202138649461938
WDR44	86	61	0	A_23_P171359	NM_019045	WDR44	-1.07634087212846	7.84694736657089	-7.51531274933635	2.25963944352636e-05	0.000848316048913663	3.1387113010879
RRM2	144	96	0	A_24_P225616	NM_001034	RRM2	-1.07650675620959	9.55626872670094	-3.24259979241863	0.00905119646451174	0.0325946560438448	-2.98936779631369
CASD1	61	27	0	A_24_P69379	NM_022900	CASD1	-1.07655374330508	6.74661277185396	-5.46129919856691	0.000295908585167035	0.00328302630411299	0.509087971160906
CTBS	102	77	0	A_24_P940135	NM_004388	CTBS	-1.07674342394743	9.72735517568117	-5.02328115439876	0.000550873447799477	0.0048606995587349	-0.130198670233423
LAMTOR2	259	153	0	A_33_P3246068	NM_014017	LAMTOR2	-1.07708171552966	11.4834322453906	-5.92228497452806	0.000158409084306087	0.00224187847282035	1.15121542702468
HSP90B1	180	122	0	A_33_P3408212	NM_003299	HSP90B1	-1.07793899333358	13.8806495026892	-6.44602327243663	8.06470552206863e-05	0.00156220848014118	1.84319470730533
PIGM	119	97	0	A_33_P3386965	NM_145167	PIGM	-1.078046388243	6.61225968610067	-6.49242702491973	7.6095409546658e-05	0.00151526472396124	1.90262294141768
PIGK	301	62	0	A_23_P34307	NM_005482	PIGK	-1.07952534949809	10.0479681561429	-6.65109358276021	6.25146333134935e-05	0.0013830428637045	2.10355826715315
GNB1	281	146	0	A_23_P22926	NM_002074	GNB1	-1.07995800940972	11.572271076127	-6.09392316780051	0.00012646277339793	0.00196708061814763	1.38233358670603
C3orf58	110	95	0	A_24_P371399	NM_173552	C3orf58	-1.08050231915027	7.58296878858807	-4.9084183003318	0.000651334413884321	0.00540367529925244	-0.302519073642238
FRMD7	272	149	0	A_32_P336776	NM_194277	FRMD7	-1.08114742830757	5.80945211319867	-3.43931845609578	0.00651950612823539	0.0257873476903414	-2.65831582649507
GPC6	159	36	0	A_32_P97169	NM_005708	GPC6	-1.08210224282062	8.80798422268225	-5.07792090271056	0.000509018275621684	0.00464134398116127	-0.0489044909276677
TNFRSF9	119	10	0	A_23_P51936	NM_001561	TNFRSF9	-1.0828543764359	7.66880941482909	-3.87931549477871	0.00317552009249463	0.0156096161761192	-1.92722448363834
ANKRD30BP2	118	126	0	A_24_P917819	NR_026916	ANKRD30BP2	-1.082934510549	6.13912127327542	-4.26341480030832	0.0017281351546643	0.0102854603578251	-1.30484213608157
SNORD11	27	112	0	A_21_P0000366	NR_003031	SNORD11	-1.08304418629239	7.46137337529554	-3.39443366027956	0.00702410836365635	0.0271495640905223	-2.73369089573015
ZNF480	188	30	0	A_33_P3338011	NM_144684	ZNF480	-1.08307106919392	6.37373952803127	-5.54951455040342	0.000261958961680925	0.00302214289656685	0.634397244831989
RBM7	177	163	0	A_23_P138975	NM_016090	RBM7	-1.08315733648956	8.04449851312244	-3.68466366694905	0.00435349225434657	0.0194228247094696	-2.2486582790927
KIAA1407	69	130	0	A_23_P419213	NM_020817	KIAA1407	-1.08397087580107	7.09421051652676	-3.6488071036116	0.00461626239045427	0.0202801464036334	-2.30824385600937
TNKS2	223	27	0	A_23_P12620	NM_025235	TNKS2	-1.08402588584444	7.68756227877698	-3.31251836410186	0.00805173960165487	0.0299054479393384	-2.87151267304105
RNF20	305	101	0	A_24_P98385	NM_019592	RNF20	-1.08420427896796	8.43098045371432	-4.02852419185696	0.00250129868969659	0.0132157103938013	-1.68343458851575
FTSJD1	150	84	0	A_24_P185036	NM_018348	FTSJD1	-1.08439913045556	9.1422849072393	-5.44512354218773	0.000302631196400079	0.00332361293725479	0.485985296206855
TSPAN31	342	131	0	A_23_P24987	NM_005981	TSPAN31	-1.08440055032667	8.23127586466454	-7.11558215155883	3.57884850136824e-05	0.00104048930513601	2.6720863777326
ACTR6	270	112	0	A_23_P162596	NM_022496	ACTR6	-1.08485029269416	9.87900685528533	-4.16211827920663	0.00202504761714136	0.0114784852854569	-1.46729273881433
ECT2	300	159	0	A_23_P44684	NM_018098	ECT2	-1.08581420365179	8.90444921158956	-4.70656448832572	0.00087832104160108	0.0065292058152755	-0.609971435052834
XLOC_009920	102	49	0	A_21_P0007505	lnc-MLXIP-1:1	XLOC_009920	-1.08633781707467	6.64073441282688	-4.71172211717935	0.000871573061833987	0.0065022550994592	-0.602043112857271
XLOC_000587	171	137	0	A_21_P0001429	lnc-SRP9-1:3	XLOC_000587	-1.08985651914291	7.03129736251992	-3.29904922270278	0.0082350263651463	0.0304319663302955	-2.89420251431941
UTP14C	52	9	0	A_33_P3229161	NM_021645	UTP14C	-1.08995460817376	7.78010909532463	-7.3693201057648	2.66728266276334e-05	0.000914257403870804	2.97064711898461
LGR4	157	133	0	A_24_P90216	NM_018490	LGR4	-1.09062641982299	11.3567795620018	-5.01919824369649	0.000554145419134209	0.00488181308162707	-0.136290907589284
LCA5	348	104	0	A_23_P418083	NM_181714	LCA5	-1.09181756641977	7.33222604308382	-3.35170525972462	0.00754204661751219	0.0285098603587782	-2.80554230053337
SEC31B	142	6	0	A_23_P35564	NM_015490	SEC31B	-1.09228585225125	8.57190941290962	-3.07258865288577	0.0120490155657491	0.040104805256706	-3.27643518606499
RAB23	47	20	0	A_23_P70794	NM_016277	RAB23	-1.09361173348384	10.4529555959733	-5.51538053906828	0.000274571473835995	0.00311798649122962	0.586047038520563
GM2A	275	12	0	A_33_P3405334	NM_000405	GM2A	-1.09372489846564	10.6504428586599	-7.83510656780161	1.58409701293707e-05	0.00071322897671672	3.49763957948855
PCYOX1	30	85	0	A_24_P940517	NM_016297	PCYOX1	-1.0945857150024	10.9599577069408	-7.20074690992898	3.23991419571337e-05	0.000985361238337133	2.77322178147549
UACA	195	32	0	A_33_P3323718	NM_001008224	UACA	-1.09464817093059	8.05681593924553	-6.11606944773456	0.000122875721194589	0.00193016933210482	1.41184346991126
SSFA2	1	64	0	A_23_P102060	NM_006751	SSFA2	-1.0947443128741	11.4551986385145	-4.10066276808149	0.00223102531695319	0.0122298949506822	-1.56646058619289
HSD17B6	58	37	0	A_23_P25030	NM_003725	HSD17B6	-1.09476427328116	9.23753752294054	-3.0738302154878	0.0120237823085199	0.0400608378955266	-3.27433764028561
ZFC3H1	162	11	0	A_23_P150950	NM_144982	ZFC3H1	-1.09577143471621	8.84561838760047	-3.7857633056251	0.00369336621854443	0.0173171370207519	-2.08126125555679
LYRM1	283	65	0	A_23_P54929	NM_020424	LYRM1	-1.09579395237947	10.2543152439511	-5.84141048546535	0.000176388300328421	0.00238597307114402	1.04082583488324
POT1	65	72	0	A_33_P3882624	NM_015450	POT1	-1.09589143698425	7.64449240951226	-5.37185702849554	0.000335200459662029	0.00355414560323732	0.38085697582413
ARID3A	120	38	0	A_33_P3272921	NM_005224	ARID3A	-1.09607065046059	8.59349928921313	-4.63961564131197	0.000971139813213568	0.00700191312441009	-0.713225943122747
B3GNT2	239	148	0	A_23_P500956	NM_006577	B3GNT2	-1.09822920927695	7.17334861252631	-4.1672378468355	0.00200881808025661	0.0114184197802369	-1.45905205773936
SMAD2	359	34	0	A_32_P12580	NM_001003652	SMAD2	-1.09825722151375	8.08823794344987	-3.29692339431119	0.00826434508717205	0.0305267682499333	-2.89778428920357
STARD3NL	48	72	0	A_33_P3275948	NM_032016	STARD3NL	-1.09865761633002	10.9212821207762	-4.25181867836488	0.00175966269889278	0.0103951137946294	-1.32337411243076
KDELR2	238	117	0	A_23_P19938	NM_006854	KDELR2	-1.10092427212925	11.8773964632102	-3.84358440143844	0.00336370262895616	0.0162032339376044	-1.98595422537646
CPD	101	47	0	A_24_P53282	NM_001304	CPD	-1.10130104570963	10.3644940100234	-3.91503204696817	0.002998414242451	0.0149956718297782	-1.86864989985816
FAM190B	249	100	0	A_23_P404108	NM_018999	FAM190B	-1.10168324193844	10.6831349805515	-6.5461361977043	7.1171212503244e-05	0.00147606644431837	1.97103144855036
SYPL1	32	135	0	A_23_P93881	NM_182715	SYPL1	-1.10196206592552	11.682675552006	-4.96571924042141	0.000598973289760169	0.00510989396889957	-0.216313911711404
DCBLD2	27	81	0	A_23_P91829	NM_080927	DCBLD2	-1.1022883123815	11.5884804509364	-4.30028032889281	0.00163180983216699	0.0099068221552733	-1.24604008008672
CENPA	117	62	0	A_24_P413884	NM_001809	CENPA	-1.1023033001709	8.72264832962479	-3.94629118318202	0.00285191352854479	0.0145077283174451	-1.81749584043774
RFXAP	230	39	0	A_23_P315789	NM_000538	RFXAP	-1.10262670152175	8.16157782170661	-6.2587290963926	0.000102244725784158	0.00176142180645117	1.60024679661684
TPM4	284	26	0	A_24_P82880	NM_003290	TPM4	-1.10323450390897	12.5226509606271	-5.58350368243603	0.000250016260757644	0.0029331133013814	0.682370619021006
STXBP6	15	106	0	A_23_P205713	NM_014178	STXBP6	-1.10347731643217	8.85580603308965	-8.01664698079619	1.30105892085378e-05	0.000658166010182995	3.6959193431411
EPB41L4B	366	102	0	A_23_P216556	NM_018424	EPB41L4B	-1.10409490163704	8.73840529868143	-5.96540884461497	0.000149637952109444	0.00216202831239482	1.20968653843461
CUTC	270	47	0	A_23_P98015	NM_015960	CUTC	-1.10543664078805	9.92511202727606	-8.61849825336761	6.93596009341408e-06	0.00055146019216221	4.32622477509011
PIK3CB	381	153	0	A_23_P346969	NM_006219	PIK3CB	-1.10755407325866	7.53042635691341	-5.081307382013	0.000506538557881792	0.00462632995381183	-0.043880455577785
FKBP7	129	60	0	A_23_P79622	NM_181342	FKBP7	-1.10781025467566	10.7852611150878	-6.07324018521306	0.000129914972384161	0.00199131039183157	1.35470956350403
CDKN2D	265	158	0	A_23_P89941	NM_001800	CDKN2D	-1.10812812356805	12.0264934588087	-4.74220356726841	0.000832802989087586	0.0063148224830269	-0.555263992143971
HSD17B4	227	129	0	A_23_P92954	NM_000414	HSD17B4	-1.10867445144123	10.8601579477128	-8.45314115233653	8.21580306824004e-06	0.000571219561299982	4.15707724346341
ILKAP	247	31	0	A_23_P142590	NM_030768	ILKAP	-1.109449804607	8.51970615139525	-4.90261076348033	0.000656907672365788	0.0054195022570089	-0.311282751703954
CENPH	20	54	0	A_23_P110802	NM_022909	CENPH	-1.11099086410443	9.2660207242412	-5.47201451281243	0.00029154365577054	0.00324220678336544	0.52437059976475
LOC100506390	258	156	0	A_33_P3227731	ENST00000412709	LOC100506390	-1.11128774040958	9.8491775319626	-3.88200525976411	0.00316180808863482	0.0155789887455095	-1.92280869765181
ZNF644	128	60	0	A_24_P256337	NM_201269	ZNF644	-1.11229496688728	7.75747177480884	-8.46043014148101	8.15426021402604e-06	0.000571219561299982	4.16459633245302
MANEA	50	48	0	A_23_P255663	NM_024641	MANEA	-1.1123442476268	8.83021145456616	-5.94207106422473	0.000154317823534944	0.0022092643214037	1.17807681857152
KIF14	334	2	0	A_33_P3230548	NM_014875	KIF14	-1.11242880070219	7.49257938332287	-4.4156473655194	0.00136537397803051	0.00880935906274604	-1.0631609838078
KDELR3	37	142	0	A_23_P211504	NM_016657	KDELR3	-1.11273432552991	10.8615983874835	-3.83796243046768	0.00339435928973224	0.0162960578004487	-1.99520655148388
TP53INP2	337	96	0	A_24_P357465	NM_021202	TP53INP2	-1.11462758772853	7.97764618866528	-7.98291830147997	1.34917358829839e-05	0.000659116797872813	3.65937461202082
ARHGAP18	168	35	0	A_32_P162250	NM_033515	ARHGAP18	-1.11609649327124	7.18670516330165	-5.85750383669444	0.000172642647853549	0.0023574212054035	1.06286878976171
RORA	223	59	0	A_23_P26124	NM_134260	RORA	-1.11633463673289	9.41492693851516	-5.27066977364792	0.000386506074048137	0.00388816708186469	0.234355990780861
KIF20B	105	126	0	A_23_P75071	NM_016195	KIF20B	-1.11636337327337	7.41834499987947	-5.8826697561542	0.000166956017319	0.00231391039310917	1.09726229204349
HDAC3	76	99	0	A_33_P3309929	NM_003883	HDAC3	-1.11648470372267	12.135178739792	-6.30193903936303	9.67589816055079e-05	0.00172212379761341	1.65673760617421
METTL18	7	143	0	A_23_P85726	NM_033418	METTL18	-1.11652479068131	8.26148868012455	-6.6955890764595	5.91948755969994e-05	0.00134349786453735	2.15928309112091
NSL1	98	123	0	A_24_P370970	NM_015471	NSL1	-1.11654753716384	7.17075071359452	-4.62022561066084	0.000999930184128297	0.00708542617498652	-0.74324846938229
NINL	257	88	0	A_23_P143374	NM_025176	NINL	-1.11684791339252	6.58388616836877	-5.17157952758749	0.000444980482949209	0.0042113541291371	0.0894203976957604
NRN1	24	63	0	A_23_P414519	NM_016588	NRN1	-1.11716876037482	7.57658234070198	-5.33861002466024	0.00035120233786992	0.00365172300784094	0.332888847929231
GOLGA8A	198	16	0	A_23_P37623	NM_181077	GOLGA8A	-1.11911306629376	7.44588760328353	-3.5247014171748	0.00566064387709927	0.0234673395290309	-2.51526392129027
HLTF	248	1	0	A_24_P277155	NM_003071	HLTF	-1.12088999650183	10.5678432917917	-5.0593758236474	0.000522829856557184	0.00471055845342679	-0.0764470852899342
VBP1	144	156	0	A_23_P256223	ENST00000460509	VBP1	-1.12103770305269	9.72168337747308	-6.86829249713297	4.80070176300796e-05	0.00117960265049176	2.37301420644043
CDK14	207	88	0	A_24_P29733	NM_012395	CDK14	-1.12164412423226	8.58429264324749	-6.39657730338892	8.58230412519424e-05	0.00160949610687609	1.77953776208651
CXADR	229	44	0	A_23_P57268	NM_001338	CXADR	-1.12174792856563	5.8802491872924	-4.02599955552253	0.00251135979941787	0.0132352872187606	-1.68753917035516
LOC284950	27	109	0	A_33_P3791552	NR_038888	LOC284950	-1.12206289426566	6.15463477756673	-3.20781218751368	0.00959520013111919	0.0340026460294224	-3.04806362457292
AK5	219	155	0	A_33_P3307253	NM_012093	AK5	-1.122416864052	6.86680516840858	-4.57038276079238	0.00107818054496072	0.00745596085450423	-0.820662727316031
ITGB3	68	153	0	A_24_P318656	NM_000212	ITGB3	-1.12251888062299	11.7834658037575	-4.46679211001314	0.00126237870094743	0.00831668772680787	-0.982649311476865
PLS3	316	150	0	A_23_P250607	NM_005032	PLS3	-1.12461303077054	11.0204652633772	-7.04920118381924	3.86969702446553e-05	0.00107048031753655	2.59259993007695
NEURL1B	296	98	0	A_32_P198731	NM_001142651	NEURL1B	-1.12475287346366	11.0502799722711	-5.48461225975476	0.000286500115104559	0.00321018296827699	0.542316240917148
XLOC_l2_012150	122	28	0	A_21_P0012918	TCONS_l2_00023029	XLOC_l2_012150	-1.12494817117493	9.57278482025758	-4.78703966158876	0.000779075964490175	0.00602660650765882	-0.486695636044331
HOXA6	69	83	0	A_21_P0000199	NM_024014	HOXA6	-1.12560345030781	5.94252621081122	-3.23333300997512	0.0091929348683042	0.0329266012130255	-3.00500003848329
S100A4	31	142	0	A_23_P94800	NM_002961	S100A4	-1.12839669209245	8.96325824353055	-3.74584375763091	0.00394056329091014	0.0180969849046548	-2.14724757822465
HYMAI	263	87	0	A_33_P3308481	NR_002768	HYMAI	-1.12892047276961	6.92352169220104	-4.4541203046452	0.00128710522484683	0.00845500234255653	-1.00256449074056
TXNDC16	206	95	0	A_23_P398836	NM_020784	TXNDC16	-1.12909545557209	7.95823296589424	-3.76663083671214	0.00380975376787373	0.017661386924895	-2.11286832495779
UBE2Q2P2	66	162	0	A_33_P3342992	NR_004847	UBE2Q2P2	-1.12944819759649	6.79142426188803	-3.59118276582469	0.00507372230730186	0.0217394907194809	-2.40422176671337
EXOC5	9	36	0	A_23_P14464	NM_006544	EXOC5	-1.12952964665386	8.06385857105024	-6.126454766178	0.000121231541914504	0.00191797844700778	1.42565751931572
ITFG1	207	90	0	A_23_P334123	NM_030790	ITFG1	-1.13025772750807	12.0021082553714	-6.37665553394993	8.80089524513806e-05	0.00163085777406847	1.75379306786074
TMEM165	173	90	0	A_24_P43391	NM_018475	TMEM165	-1.13074519635264	10.1163492900898	-5.70444426181974	0.000212045200000811	0.00265598570437106	0.851683450687654
BCKDHB	144	86	0	A_23_P93464	NM_000056	BCKDHB	-1.1309232956888	7.27411501112263	-4.57341768696335	0.00107323459610017	0.00743101210990552	-0.8159391372112
CHPT1	38	110	0	A_23_P105571	NM_020244	CHPT1	-1.13192602468367	10.3646542274463	-6.8626929315923	4.83314533653332e-05	0.00118231083937311	2.36614772110598
LOC100507760	179	65	0	A_21_P0014734	A_21_P0014734	LOC100507760	-1.13196124892862	6.92654587333116	-2.95736011411238	0.014642575667494	0.0463476071993319	-3.47106290237702
C5orf39	314	75	0	A_33_P3299279	NM_001014279	C5orf39	-1.13251540076466	9.71139479839468	-3.56947930810372	0.00525803688059605	0.022277120140857	-2.44043716123228
NMNAT2	165	33	0	A_23_P354908	NM_015039	NMNAT2	-1.13281238933394	10.5102976589525	-4.02638704938735	0.00250981280873705	0.0132336264566755	-1.68690913155186
RAP2C	96	68	0	A_23_P147826	NM_021183	RAP2C	-1.13287512287509	7.62750451289909	-6.12497785002264	0.000121463909093776	0.00191797844700778	1.42369394509656
ATP7A	18	85	0	A_23_P217737	NM_000052	ATP7A	-1.13341163545122	7.03851196865736	-7.79679643585355	1.6520059410337e-05	0.000731456128533458	3.45529629324727
XLOC_006132	186	8	0	A_21_P0005565	lnc-VKORC1L1-1:1	XLOC_006132	-1.13527554703173	6.71826556352642	-3.27425529959362	0.00858374747951057	0.0313177068027084	-2.93598785027381
GREM1	255	111	0	A_33_P3319870	NM_001191323	GREM1	-1.13573596782133	12.687231949178	-3.39759355562827	0.00698729606250373	0.0270637910033131	-2.72838090877842
SEC22B	282	90	0	A_23_P412392	NM_004892	SEC22B	-1.13629608287329	11.0845607320057	-6.76608679296374	5.43194309645948e-05	0.00127104212876194	2.24701763286081
TP53INP1	38	5	0	A_23_P168882	NM_033285	TP53INP1	-1.13701624467352	8.12173416438003	-5.9936321232673	0.000144181744611666	0.00211192093902704	1.24780739744347
TMSB15A	239	138	0	A_23_P137173	NM_021992	TMSB15A	-1.13870737746457	9.59975023669159	-5.447593472709	0.000301594176738679	0.00332361293725479	0.489515455183151
LOC152742	172	4	0	A_19_P00808586	NR_033931	LOC152742	-1.13919230533248	5.98096896318833	-3.61146782894913	0.00490752770499728	0.021207394043463	-2.37040552949847
C1orf213	2	124	0	A_23_P362228	NR_033690	C1orf213	-1.13981000149212	10.3627244961943	-3.13106881521948	0.0109172612716986	0.0373657447824024	-3.17764372455679
GSTA4	48	163	0	A_23_P110941	NM_001512	GSTA4	-1.14403951559077	8.09041115398022	-4.78401163517205	0.000782585591042157	0.00604688931408687	-0.491317385849508
KIAA0232	246	157	0	A_23_P327069	NM_014743	KIAA0232	-1.14450438565635	10.5400272209912	-4.78707724561538	0.000779032508309965	0.00602660650765882	-0.486638278886966
SSPN	118	61	0	A_23_P203920	NM_005086	SSPN	-1.14615174447973	11.3400991987855	-7.54590439607407	2.18310897260154e-05	0.000845777031966721	3.17358970970747
GJA1	165	26	0	A_24_P55295	NM_000165	GJA1	-1.14621952669907	12.1149207584348	-3.48441114204321	0.00605027129355264	0.0245431293580167	-2.58270923397329
XLOC_l2_015202	276	119	0	A_21_P0013727	XR_252552	XLOC_l2_015202	-1.14628218002369	6.18956222490951	-5.23426466579502	0.000406971796370368	0.00400240088125234	0.181276542383775
PDIK1L	100	101	0	A_33_P3302280	NM_001243533	PDIK1L	-1.14655112585906	6.90986743230921	-4.87163936017617	0.000687501396487456	0.0055718273449081	-0.358101750717381
TMEM106C	276	99	0	A_23_P48175	NM_024056	TMEM106C	-1.14658202449189	13.5737701622628	-7.07975466722553	3.73276242249777e-05	0.00105222811354725	2.62925739445194
SETD5	9	147	0	A_33_P3376434	NM_001292043	SETD5	-1.14727730922979	8.59291431697698	-4.57982816338349	0.00106286662413051	0.00737163388131967	-0.805965990420228
CHRDL1	233	39	0	A_24_P168925	NM_001143981	CHRDL1	-1.14810956070498	6.95130025231691	-4.88190660108714	0.00067719429305926	0.00552344036489418	-0.342565519779752
XLOC_l2_014982	46	149	0	A_21_P0013706	ENST00000428292	XLOC_l2_014982	-1.14903025658867	6.46631556095144	-5.77288727508239	0.00019334479548651	0.00251635230313263	0.946544384621112
MYO9A	311	102	0	A_23_P205841	NM_006901	MYO9A	-1.14959512318437	11.085926139644	-5.25253820920574	0.000396557665628732	0.00394053592308854	0.207944317406072
DLGAP4	299	146	0	A_24_P216253	NM_014902	DLGAP4	-1.15089266710415	10.178822436309	-5.28890502394775	0.000376671776393461	0.00381689484363666	0.26086954919102
LRP11	222	158	0	A_33_P3420078	ENST00000367368	LRP11	-1.15205715580979	7.89894507762298	-6.97469177544213	4.22701591305559e-05	0.00111368369503239	2.50268835037294
XLOC_l2_010267	172	81	0	A_21_P0012452	ENST00000474651	XLOC_l2_010267	-1.15313796389137	6.91861456409463	-7.27990148534726	2.95595640927859e-05	0.00094677756173598	2.86637774644397
XLOC_l2_004611	109	52	0	A_21_P0011311	ENST00000624918	XLOC_l2_004611	-1.15329030322379	7.77592921156162	-3.89399449439707	0.00310143961070516	0.0153595945728707	-1.90313506923869
SIPA1L2	211	151	0	A_23_P137470	NM_020808	SIPA1L2	-1.15416627863177	9.44413912500495	-7.71440556854517	1.80902731528126e-05	0.000763275191227982	3.36363268806567
C1orf109	131	135	0	A_23_P45970	NM_017850	C1orf109	-1.15533590460658	9.16866586048143	-4.02243852169518	0.00252562354965859	0.0132819719841102	-1.69332996691687
C5orf13	90	145	0	A_24_P149124	NM_004772	C5orf13	-1.15542630784236	8.41673078115781	-5.99945941383832	0.000143082128330003	0.00210752004938066	1.25566381643862
HAPLN3	364	131	0	A_33_P3259393	NM_178232	HAPLN3	-1.15734347713809	11.8013278670069	-6.79727562717212	5.2302797212192e-05	0.00125008938128824	2.28561629351156
PPM1K	48	107	0	A_24_P214598	NM_152542	PPM1K	-1.15894420121393	7.67771028693253	-4.19215512704553	0.00193176374405154	0.0110969835214326	-1.41898979830868
TANK	46	126	0	A_23_P154306	NM_004180	TANK	-1.15899578374657	8.84585190298168	-5.39069966723421	0.000326480046619464	0.00349314778203831	0.407969927208289
SELT	51	24	0	A_33_P3305851	NM_016275	SELT	-1.16114899735011	10.1628094131153	-6.05086306976905	0.000133764743637758	0.00202764955801766	1.32475316899641
TMOD3	298	123	0	A_23_P65674	NM_014547	TMOD3	-1.1611644442182	9.34853242359859	-5.97392950156048	0.000147967631824678	0.00215095355895926	1.22120751212694
TAS2R10	272	92	0	A_23_P64888	NM_023921	TAS2R10	-1.16119330535615	6.23489237120807	-3.51404143018307	0.00576112725117213	0.0237364924188769	-2.53309808039657
PRRC2C	372	85	0	A_23_P412409	NM_015172	PRRC2C	-1.16172542209777	9.80786430680423	-5.2190040236262	0.000415893343675843	0.0040445809762381	0.158967794270533
XLOC_l2_012081	188	114	0	A_21_P0012910	ENST00000492832	XLOC_l2_012081	-1.16189707533115	6.89051033881233	-3.10146526619324	0.011475899857233	0.0387076363072776	-3.22765089243468
GUSBP2	248	160	0	A_21_P0013069	NR_003504	GUSBP2	-1.16241148003437	7.87562992304962	-5.16009447857665	0.000452347330932019	0.0042622478427582	0.0725277063251468
GSN	231	118	0	A_33_P3423365	NM_001127663	GSN	-1.16273318838997	12.3894868078989	-4.60601375444177	0.00102160748054167	0.00716889596391899	-0.765286687226236
ZCCHC17	345	133	0	A_23_P96976	NM_016505	ZCCHC17	-1.16298651396894	10.1613605783539	-7.02306445175656	3.99116373883415e-05	0.00108577471066351	2.56114398323903
THUMPD1	213	104	0	A_24_P90878	NM_017736	THUMPD1	-1.16435884912213	7.86902088778573	-5.7509072081198	0.000199149163463133	0.00256410245475277	0.916155608489166
RAB7L1	342	94	0	A_23_P126939	NM_003929	RAB7L1	-1.16477318304954	8.21822330224074	-6.03972246803476	0.00013572709160675	0.00204155657416897	1.30981212596569
HIST1H1B	318	65	0	A_23_P250385	NM_005322	HIST1H1B	-1.16562927554894	6.20794455645199	-3.04293194131122	0.0126680995961603	0.0415949618998853	-3.32653793447682
POSTN	337	62	0	A_33_P3511265	NM_006475	POSTN	-1.16736766560359	7.18988022507851	-3.51952974080995	0.00570916398086146	0.023590428978276	-2.52391517302957
ANKRD20A9P	261	31	0	A_21_P0012182	NR_027995	ANKRD20A9P	-1.16807524006923	5.89705555233208	-5.71019281999462	0.000210402048748341	0.00264534923026311	0.859677431273872
IFIT1	296	48	0	A_23_P52266	NM_001548	IFIT1	-1.16927885900411	9.42458158820371	-3.33831162643016	0.00771239878857454	0.0289566940317474	-2.82808268078662
GABPA	18	159	0	A_33_P3269588	NM_002040	GABPA	-1.17040557665227	9.17522109791339	-5.27088240302922	0.000386389830483337	0.00388816708186469	0.234665432184467
DEPDC1	114	69	0	A_33_P3387524	NM_001114120	DEPDC1	-1.1714633943692	7.59605541921403	-6.05097938341638	0.000133744417789649	0.00202764955801766	1.3249090663388
B4GALT1	344	156	0	A_23_P135271	NM_001497	B4GALT1	-1.17175932985595	9.52819370638172	-3.11800942179454	0.0111601867977969	0.0379351359372288	-3.19970308277946
SPOCK1	88	122	0	A_24_P354689	NM_004598	SPOCK1	-1.17215881124862	13.2782028010259	-4.05343584246153	0.00240426504450709	0.0128538675790897	-1.64297191160186
XLOC_008795	59	122	0	A_21_P0006989	ENST00000452578	XLOC_008795	-1.17320982289753	7.90459382600635	-5.65391626728332	0.000227096150124985	0.00275615456982216	0.78120896283104
CNN3	72	56	0	A_23_P138168	NM_001839	CNN3	-1.17363118479926	8.8058060348766	-3.92699356432389	0.00294144310195849	0.0147951390807749	-1.84906314459179
LYPLA1	47	122	0	A_33_P3416762	NM_006330	LYPLA1	-1.17387800400496	10.7782396209235	-9.28815008381972	3.58325948517452e-06	0.000457891131424127	4.98175591103351
TOP1P2	64	67	0	A_24_P374382	NR_001283	TOP1P2	-1.17433937405222	9.09296774082578	-6.0573413601405	0.000132637717266028	0.00202160268246547	1.33343315655714
ELF1	26	63	0	A_33_P3278068	NM_001145353	ELF1	-1.17477384209131	8.14177795410738	-5.95519782055949	0.0001516664505677	0.00218376093345489	1.19586604739852
ARID4B	268	6	0	A_23_P201951	NM_016374	ARID4B	-1.17543051008737	8.33914009528511	-7.60656745721346	2.03954673931065e-05	0.00080593569762252	3.24241026528073
HSD17B11	132	7	0	A_23_P408271	NM_016245	HSD17B11	-1.17658826721712	9.22445611714947	-6.94983293044846	4.35406200701701e-05	0.00112788247231347	2.47252698404909
UGCG	318	123	0	A_23_P313389	NM_003358	UGCG	-1.1773495301515	10.4154189875737	-4.59357717656407	0.00104098678483468	0.00727151929421799	-0.784595044174177
TMEM150A	268	87	0	A_24_P291401	NM_001031738	TMEM150A	-1.17749695274056	8.10554590466616	-6.90200344391412	4.61030107980734e-05	0.00115493241636858	2.41426334930281
MORF4L2	107	47	0	A_23_P114405	NM_012286	MORF4L2	-1.17766732633924	13.0474778553157	-5.13675703040682	0.000467721741318143	0.00436309197416583	0.0381419940738557
CA12	93	160	0	A_24_P330518	NM_001218	CA12	-1.17788291879008	11.3708125561993	-7.29688298944412	2.89862685954401e-05	0.000943129391662961	2.88625810313999
ANKRD32	111	5	0	A_23_P144684	NM_032290	ANKRD32	-1.17815929289806	8.16357189290345	-6.13218430232478	0.000120334627380903	0.0019128383182619	1.43327201761564
NMU	204	149	0	A_23_P69537	NM_006681	NMU	-1.17870063079262	9.64229833809575	-4.9597101292874	0.000604247276482079	0.00513841520107961	-0.225331734645804
IRS1	170	136	0	A_24_P225679	NM_005544	IRS1	-1.17878603700792	9.17878713312498	-6.06485764219663	0.000131342928738377	0.00200553790087317	1.34349628851945
LOC100505648	46	150	0	A_21_P0011372	NR_040058	LOC100505648	-1.17931455977874	7.34884971833073	-4.02752038317009	0.00250529395334651	0.0132292025682726	-1.68506650524613
SRPK2	337	51	0	A_23_P406438	NM_182691	SRPK2	-1.18022089216025	9.0737455179318	-3.5270181497582	0.00563904761159321	0.0234172140596386	-2.5113890521668
TSPAN15	46	155	0	A_32_P7015	NM_012339	TSPAN15	-1.18072089967153	5.9103946311736	-4.48263535001279	0.00123217021180734	0.00818776368508119	-0.957780324749921
GOLGB1	246	50	0	A_23_P135787	NM_001256487	GOLGB1	-1.18110426949991	8.11406599310513	-6.17777668333183	0.000113447520554895	0.00185784887243341	1.4936954749644
LOC100505487	20	87	0	A_21_P0014317	lnc-PMM2-6:1	LOC100505487	-1.1820628902826	11.1220245695878	-5.71572256544674	0.000208834359189464	0.00263358939419931	0.86736252830035
NFE2	361	128	0	A_23_P13753	NM_006163	NFE2	-1.18353620059835	6.70161486305234	-3.39880908069185	0.00697318857517912	0.0270280010409281	-2.72633844177419
PCDHB9	378	63	0	A_23_P18798	NM_019119	PCDHB9	-1.18384345340019	9.68738691371854	-4.61156362744409	0.00101308342921122	0.00713311785597198	-0.75667719384479
CHI3L2	12	45	0	A_23_P12082	NM_001025199	CHI3L2	-1.18568231172845	9.38558201071029	-4.1801678799794	0.00196843640714958	0.0112456042889934	-1.43825353058272
NCOA3	103	143	0	A_23_P120442	NM_181659	NCOA3	-1.18678366351148	7.7402504330255	-5.79222663846838	0.000188388191489703	0.00247309604572653	0.973223421195614
POGZ	61	156	0	A_33_P3357382	ENST00000485040	POGZ	-1.1870084862103	8.21618840607206	-5.45572811014251	0.000298205659798317	0.00329648844497688	0.50113551939527
ORAI2	73	63	0	A_24_P329353	NM_032831	ORAI2	-1.19019220538061	8.49332482978181	-3.6997090508584	0.00424792584467062	0.0191001880287093	-2.22368878901243
SH3BGRL	183	112	0	A_23_P148297	NM_003022	SH3BGRL	-1.19045733136983	12.5340302570564	-7.4733483187156	2.36940050436212e-05	0.000864392415025331	3.09067667802666
XLOC_008088	19	154	0	A_21_P0006520	lnc-ATP2B3-1:1	XLOC_008088	-1.19083840628406	8.18833615185108	-3.92097281754607	0.00296997578351397	0.0148981712067327	-1.85892010520755
XLOC_003123	134	80	0	A_21_P0002852	NR_110702	XLOC_003123	-1.190843584867	7.55961422924108	-3.50755934701328	0.00582313254535628	0.0238640996489767	-2.54394635063819
LOC100507567	89	126	0	A_21_P0000732	NR_038237	LOC100507567	-1.19246361107377	9.40792398404328	-3.83245551238748	0.0034246723662829	0.0164130083285118	-2.00427258103298
C4orf3	78	70	0	A_23_P388433	NM_001170330	C4orf3	-1.19384837550033	13.9611642165163	-4.28273491280587	0.00167692612366046	0.0100778904379725	-1.27400414883981
LBH	35	90	0	A_23_P120227	NM_030915	LBH	-1.19434008558722	7.52201205520217	-4.40354490959259	0.00139102564496285	0.00890587863929133	-1.08226365787024
TMEM159	43	129	0	A_23_P406131	NM_020422	TMEM159	-1.19455706548289	9.78683055879335	-3.69882398730245	0.00425406135744199	0.0191174556659364	-2.22515710727373
MSMO1	92	153	0	A_23_P110184	NM_006745	MSMO1	-1.19481496689533	7.43736407452381	-4.61482861224929	0.00100810407652225	0.00712008631312377	-0.751614240689642
TGFB2	129	114	0	A_24_P402438	NM_003238	TGFB2	-1.19489064802376	10.0335460682031	-3.90156650226854	0.00306393663172771	0.015242808345573	-1.8907175451338
STON1	380	95	0	A_23_P302005	NM_006873	STON1	-1.19515442830311	8.80516341103777	-4.3752439466622	0.00145302413246326	0.00914409385938636	-1.12700991846693
PI4K2B	251	54	0	A_23_P18598	NM_018323	PI4K2B	-1.19562581191387	9.7490188892217	-6.29478647089845	9.76446380299652e-05	0.00172571573488917	1.64740500294728
SUPT16H	303	163	0	A_23_P151634	NM_007192	SUPT16H	-1.19576817581832	7.04133699719422	-5.12690885486217	0.000474376479690359	0.00440013239151542	0.0236074389397034
MORF4L1	42	49	0	A_24_P398898	NM_206839	MORF4L1	-1.19662497225543	14.6005922264583	-5.81206793621229	0.000183444758313409	0.00244428185961752	1.00053772844292
FAM103A1	247	108	0	A_23_P65712	NM_031452	FAM103A1	-1.19674159644879	10.1926332071844	-6.65638706009272	6.21093358562796e-05	0.00137590349206085	2.11020191190083
STT3B	207	63	0	A_23_P434473	NM_178862	STT3B	-1.19771412810291	9.4054630185384	-5.04313612257538	0.000535253657374586	0.00476833726107124	-0.100607312770648
REV3L	151	87	0	A_23_P214139	NM_002912	REV3L	-1.19795780399208	10.6240549990567	-3.79084997876124	0.00366305275932701	0.0172137647158332	-2.07286384492967
DHX33	84	122	0	A_24_P364970	NM_020162	DHX33	-1.19836670565692	7.8121550853273	-6.15216175625982	0.000117262884888246	0.0018807098629788	1.45978488219794
LAMC1	250	114	0	A_23_P201628	NM_002293	LAMC1	-1.19838404955538	12.9520811892884	-5.06570851842925	0.00051806902399492	0.00469559949441315	-0.0670362714713395
C5orf15	323	23	0	A_23_P81650	NM_020199	C5orf15	-1.19881603960494	11.0385568862035	-6.94144652498014	4.39785117781292e-05	0.00113176512189715	2.46233314716584
IGF2R	31	33	0	A_23_P334021	NM_000876	IGF2R	-1.1996228336006	11.4074771998445	-7.72571167296714	1.78655063643192e-05	0.000761180231517118	3.37625987598437
KCTD18	22	135	0	A_23_P309515	NM_152387	KCTD18	-1.20029324382678	8.37767778947816	-7.03634315179971	3.9289442901282e-05	0.0010749634285384	2.57713636355457
LOC100505717	310	73	0	A_21_P0014729	BC017341	LOC100505717	-1.20086891077162	7.93785013692208	-3.8538408057405	0.00330851919864082	0.0160388522892151	-1.96908296261222
C19orf2	36	40	0	A_23_P119418	NM_003796	C19orf2	-1.20093809349025	9.94864588465889	-5.99683761222262	0.000143575742512324	0.00210786383051024	1.25212968488858
XLOC_014300	281	20	0	A_21_P0010370	ENST00000458154	XLOC_014300	-1.20135448975233	7.2339677405618	-4.02703300403296	0.00250723619339969	0.0132336264566755	-1.68585889085811
LAMTOR3	132	37	0	A_23_P110362	NM_021970	LAMTOR3	-1.20226688292706	9.70728372596349	-4.89278819814795	0.000666450112745059	0.00546915883163544	-0.326116320004462
LANCL1	53	32	0	A_24_P259922	NM_006055	LANCL1	-1.20459010935386	10.4208311295182	-7.26663039321254	3.00161629905211e-05	0.000952568129833605	2.850815451141
BOD1L	59	36	0	A_33_P3407195	NM_148894	BOD1L	-1.20520458484121	8.09151030042486	-5.20110526643969	0.000426624795405037	0.00410817483621533	0.132758592224929
CDC42BPA	10	88	0	A_24_P944299	NM_003607	CDC42BPA	-1.20550300884644	10.920375275691	-5.70091747822907	0.000213060112758418	0.00265989716530422	0.846776669722536
YIPF2	192	97	0	A_33_P3273364	NM_024029	YIPF2	-1.20682268402415	11.9238928237498	-4.834387565206	0.000726325211846427	0.00574814807798082	-0.414598514299448
NAV1	14	49	0	A_24_P102880	NM_020443	NAV1	-1.20742533408265	8.297895357157	-6.72223288355042	5.72987171202526e-05	0.00131298394567578	2.19252111102118
ZBED6	85	65	0	A_21_P0000092	NM_001174108	ZBED6	-1.20809869198371	6.87755247392609	-2.92477141177756	0.0154744657933114	0.048078049053228	-3.52606767565759
CRLF3	354	2	0	A_24_P56894	NM_015986	CRLF3	-1.2084873983464	6.83186202562951	-4.26038384776359	0.00173631766981182	0.0103157332601267	-1.30968431710641
RAB27B	62	36	0	A_21_P0009481	NM_004163	RAB27B	-1.20877670819668	9.79735895842807	-6.23151360017138	0.000105871656118511	0.00179604472431596	1.5645297860439
CENPC1	154	151	0	A_23_P167194	NM_001812	CENPC1	-1.2110147215858	9.11319930221309	-4.56811486194812	0.00108189228831037	0.00746922653583196	-0.824193338641307
LOC100507599	174	52	0	A_21_P0014432	XR_172371	LOC100507599	-1.21246953886981	8.06397294593912	-4.09162113894664	0.00226314538541359	0.0123409947546989	-1.58108856027326
COL12A1	115	146	0	A_23_P214168	NM_004370	COL12A1	-1.21301813596396	9.90307333006087	-6.0929102884135	0.000126629508965367	0.00196783674426683	1.38098223303949
PNRC2	102	118	0	A_33_P3323742	NM_017761	PNRC2	-1.21311890030148	9.37479634865631	-4.64362369698949	0.000965299295211304	0.00697351299172815	-0.707026632692449
C1RL	245	21	0	A_23_P363968	NM_016546	C1RL	-1.21350486283326	7.70804497680554	-4.71234632189199	0.000870760134381934	0.00650078500527398	-0.601083839141807
TCEA2	27	55	0	A_23_P147641	NM_003195	TCEA2	-1.21739132375638	10.6854625373659	-8.94169578436584	5.01792598091667e-06	0.000496112025389884	4.64837907913777
PIGN	182	148	0	A_24_P193943	NM_176787	PIGN	-1.21765915275496	7.02952403239063	-4.77604341215048	0.000791901858734895	0.00610471682770228	-0.503485747531671
PRICKLE2	97	96	0	A_24_P152188	NM_198859	PRICKLE2	-1.21824427507691	9.91988117519976	-5.81103371088212	0.000183698954813682	0.00244428185961752	0.999115402634432
XLOC_l2_001089	92	90	0	A_21_P0010772	XR_431240	XLOC_l2_001089	-1.21831875250918	6.02072382738898	-4.86778500528651	0.000691413798346737	0.00558596627868976	-0.36393803935711
RNF170	60	49	0	A_23_P146209	NM_030954	RNF170	-1.21911972878712	8.7421301635003	-8.07804853542157	1.21819226949959e-05	0.000636171317165948	3.76210659826017
EXTL2	15	109	0	A_23_P118	NM_001439	EXTL2	-1.21952409757019	7.89814473993797	-6.87133716162675	4.78316022989988e-05	0.00117873766671453	2.37674596627661
RAB5B	242	163	0	A_23_P410998	NM_002868	RAB5B	-1.21986409972756	9.48466455932103	-4.59047638749475	0.00104587917116747	0.00729618974559421	-0.789412505533802
FOSL2	361	26	0	A_23_P348121	NM_005253	FOSL2	-1.22008889401301	7.9042127962507	-5.63073563055617	0.000234381872542534	0.00280500547032045	0.74875124541055
MBNL1	340	10	0	A_23_P357811	NM_021038	MBNL1	-1.22093346944776	11.4592966960975	-4.61384701109955	0.00100959835368845	0.00712061768590003	-0.753136235827894
XLOC_001148	220	108	0	A_19_P00315826	ENST00000436880	XLOC_001148	-1.22103046033992	5.81378422067316	-4.68197760600829	0.000911262251461064	0.00669934591663277	-0.647818173084289
SEPT7	170	135	0	A_21_P0013192	NM_001788	SEPT7	-1.221632278011	8.38979163206634	-8.33546099561167	9.2827494885437e-06	0.000579402488072593	4.03486752055791
NLGN1	220	115	0	A_33_P3214690	NM_014932	NLGN1	-1.22284454127397	6.62101689794057	-6.57047291697279	6.90543997188955e-05	0.00145522990514316	2.00189657565362
PSAP	25	98	0	A_23_P12680	NM_001042465	PSAP	-1.22301869050174	12.6391946204666	-5.56891416471307	0.000255069316087326	0.00297262031770997	0.661799465784968
C14orf132	15	81	0	A_23_P151529	NM_001282463	C14orf132	-1.22487638757535	11.7514907181341	-7.26085726811197	3.0217174621463e-05	0.000954919390426705	2.84403855865254
PTGES3	109	161	0	A_32_P114896	NM_006601	PTGES3	-1.22610241005253	9.31723626518288	-6.74046402058083	5.60392017587049e-05	0.00129350361418287	2.21520847528919
HMGN1	264	134	0	A_24_P409857	NM_004965	HMGN1	-1.22690426495808	11.6349363883531	-7.01239621634874	4.04192541236946e-05	0.00109131986133975	2.54827866911745
CASP8AP2	240	43	0	A_33_P3382959	NM_012115	CASP8AP2	-1.2270800615796	8.42537486265893	-5.94119524880269	0.000154496491342452	0.0022092643214037	1.17688902922008
FAT1	70	42	0	A_23_P69586	NM_005245	FAT1	-1.22958563089431	10.7907944931334	-6.42704671661246	8.25924826766812e-05	0.00158150364242624	1.81880487067144
FLJ41941	178	140	0	A_33_P3400107	NR_024417	FLJ41941	-1.22968966755373	5.46810304217693	-4.28978587617529	0.0016586387813564	0.0100149559473057	-1.26276151893162
SEC23A	185	42	0	A_23_P140170	NM_006364	SEC23A	-1.23122930772954	11.9228407243863	-5.24204321966582	0.000402503415146623	0.00397981540961938	0.192634340523585
HOXA5	333	13	0	A_23_P93772	NM_019102	HOXA5	-1.23203083621909	6.8105669968797	-5.02152564420115	0.000552277745576324	0.00486954667325694	-0.132817821824137
KLHL13	29	54	0	A_23_P159974	NM_033495	KLHL13	-1.23306124586443	7.10982458121994	-3.68091155179587	0.00438024310935011	0.0194951829972385	-2.25488836881277
XLOC_l2_011118	201	133	0	A_21_P0012776	TCONS_l2_00021878	XLOC_l2_011118	-1.23346020029828	7.86056796975523	-5.10062571715514	0.000492637664524132	0.00453667819419984	-0.0152528848734725
ITGAV	66	23	0	A_23_P50907	NM_002210	ITGAV	-1.23348854454479	13.5832412089046	-7.12744547938342	3.52941206236859e-05	0.00103381591193462	2.68623103909653
PDPK1	26	66	0	A_24_P222599	NM_002613	PDPK1	-1.23465939387596	7.99245824031558	-7.19284302256628	3.26985399869412e-05	0.000990409050259006	2.76387538280645
MAP4K3	42	149	0	A_24_P285522	NM_003618	MAP4K3	-1.23686768411488	6.78861173790462	-5.12085981162769	0.000478514174496196	0.00442618969068969	0.0146727887630291
HP1BP3	199	8	0	A_24_P944616	NM_016287	HP1BP3	-1.23725786655948	10.8020746770538	-5.93190389191861	0.000156405728330142	0.00222695148318936	1.16428110845334
XLOC_004804	311	100	0	A_21_P0004383	lnc-C5orf39-1:5	XLOC_004804	-1.23782644377787	7.1411467637334	-5.30311236206764	0.000369195616063315	0.00376633788609844	0.281492459325331
CCDC144A	357	5	0	A_21_P0011525	NM_014695	CCDC144A	-1.23809999741534	6.4633444021065	-4.38814085941679	0.00142441576072097	0.00905700082360709	-1.10660567953871
ELF5	58	121	0	A_21_P0000188	NM_001422	ELF5	-1.23878243466698	6.48172573232496	-5.85476977359894	0.000173272900852606	0.00236022343033816	1.05912663978161
TINAGL1	373	102	0	A_33_P3355266	NM_022164	TINAGL1	-1.23894414073068	11.077546656721	-2.94054591373122	0.0150659595475505	0.0472751591830182	-3.49944607627387
KIAA1715	183	90	0	A_32_P31771	NM_030650	KIAA1715	-1.23954136231508	8.23540361194696	-6.62337654854878	6.46840578413517e-05	0.00140868160517447	2.06870866455588
PTMA	18	75	0	A_24_P542375	NM_002823	PTMA	-1.24101295232257	13.5596128271327	-5.53642213436842	0.000266721467808366	0.00305407173961554	0.615872499679289
MOXD1	13	118	0	A_23_P31064	NM_015529	MOXD1	-1.24139359084867	12.8362697355082	-7.65012577079051	1.94280184058207e-05	0.000781766566721175	3.29154615951093
C11orf61	47	68	0	A_23_P52885	NM_024631	C11orf61	-1.24163162450003	7.33191106582731	-3.76581362469803	0.00381480966935375	0.0176677548739962	-2.11421913519449
LOC100652915	85	117	0	A_21_P0014747	XR_241220	LOC100652915	-1.24222234004611	7.85350525341359	-4.61448473093705	0.00100862729439879	0.00712008631312377	-0.752147421290918
ZNF800	270	114	0	A_33_P3380932	ENST00000393312	ZNF800	-1.24240255930979	7.5417352120319	-6.33234249053947	9.30899805570243e-05	0.00168592053997121	1.69632664121109
RIF1	255	25	0	A_23_P5611	NM_018151	RIF1	-1.24321938283788	7.8205559779814	-6.46065456761525	7.91809181793065e-05	0.0015428915429209	1.86196523638291
BSCL2	36	150	0	A_24_P244442	NM_032667	BSCL2	-1.24412791853355	10.5098944975742	-4.38174739923882	0.00143852266458095	0.00908773191856429	-1.11671805166969
XLOC_l2_001888	194	152	0	A_21_P0010937	ENST00000446557	XLOC_l2_001888	-1.24472098622589	6.88676424461081	-6.48781300750333	7.65353044065187e-05	0.0015167994926099	1.89672736804696
DDHD2	46	84	0	A_23_P157600	NM_015214	DDHD2	-1.24529110228974	9.04476370852237	-4.79882290604368	0.000765577382507272	0.0059680643964383	-0.468723088013605
ETS1	69	140	0	A_24_P751074	NM_005238	ETS1	-1.24758402955853	6.86140138949159	-4.17103694498835	0.00199686326898957	0.0113729043412299	-1.45293892446006
ADA	354	72	0	A_23_P210482	NM_000022	ADA	-1.24830645698087	14.6678968119931	-4.69751586833623	0.000890294486025762	0.00659467133957456	-0.623890097056413
LARP7	92	61	0	A_23_P84070	NM_016648	LARP7	-1.24876499119225	10.0508485580746	-8.74719652787711	6.09021404883105e-06	0.000531187831620296	4.45582976347197
LOC100131829	275	150	0	A_33_P3423700	AK124002	LOC100131829	-1.24912720024387	6.49152954563281	-3.87784018589454	0.00318306744813645	0.0156318673789055	-1.9296468137718
ASB8	112	51	0	A_24_P643587	NM_024095	ASB8	-1.24928179196454	6.76232036549179	-5.55567161435253	0.000259750914288505	0.0030070816408146	0.643100224168792
SESN1	124	158	0	A_23_P93562	NM_014454	SESN1	-1.25015366272378	8.61235064150734	-4.42778079861162	0.00134015918303526	0.00870058917778033	-1.04402896823102
C21orf96	278	45	0	A_24_P65941	NR_026812	C21orf96	-1.25131244627246	6.11090515676242	-3.87647201422908	0.00319008351968866	0.0156524711107622	-1.93189343372462
WSB1	228	69	0	A_23_P4353	NM_015626	WSB1	-1.2524864044332	11.7719171004026	-4.36004141950111	0.00148753003249637	0.00931077626094691	-1.15108994133039
NEXN	80	19	0	A_33_P3341429	NM_144573	NEXN	-1.25261838382268	7.20787721977309	-4.13340571100583	0.00211866830628787	0.0117885421891949	-1.5135685377937
FBXO9	125	106	0	A_23_P254120	NM_033480	FBXO9	-1.25442200529472	10.4065277227167	-5.11997332465895	0.000479123789454212	0.00442936915012082	0.0133629628869141
COL5A1	29	113	0	A_23_P83818	NM_000093	COL5A1	-1.25442875851965	12.791206317156	-6.3955316410479	8.59363053833027e-05	0.00160949610687609	1.77818785578418
ADD1	170	123	0	A_24_P100742	NM_014189	ADD1	-1.25451189664375	7.01382216368415	-6.45716229801433	7.95282258828669e-05	0.00154592848889461	1.85748772171818
LOC100507149	262	59	0	A_21_P0014843	AK130387	LOC100507149	-1.2547426306813	6.2897198241862	-4.06575880463177	0.00235773776162419	0.0126988533368566	-1.62298272506674
BHLHE41	225	112	0	A_23_P139500	NM_030762	BHLHE41	-1.25481703004101	12.4166783043405	-5.33269951710836	0.000354131853090232	0.0036734013328955	0.324344109697682
PURG	28	69	0	A_23_P111919	NM_013357	PURG	-1.25518038404914	6.33917467180993	-6.59680785084132	6.68402454783172e-05	0.00143122319977286	2.03520340739116
XLOC_008916	209	22	0	A_21_P0006626	ENST00000621606	XLOC_008916	-1.26019102354874	6.66295081978439	-3.20392447316752	0.00965804842080726	0.0340948142916356	-3.05462517033243
SLC35A5	110	62	0	A_23_P255057	NM_017945	SLC35A5	-1.26053407425055	9.09726601259608	-6.55592454562585	7.03114995467034e-05	0.00147335757352017	1.98345544248492
XLOC_l2_015476	211	44	0	A_21_P0013756	ENST00000421897	XLOC_l2_015476	-1.26125764320036	13.0312678579282	-4.73230133699436	0.000845192562470264	0.0063797294509253	-0.570446224752462
SLMO2	101	119	0	A_24_P288424	NM_016045	SLMO2	-1.26437469803379	10.0263515135332	-7.64694641978274	1.94969185682607e-05	0.00078264859380399	3.28796757596042
ADD3	126	38	0	A_24_P90097	NM_016824	ADD3	-1.26515726176154	10.0175801976757	-8.89474768282065	5.25643796652242e-06	0.000499908934041099	4.602262987506
LOC100132909	83	110	0	A_21_P0014071	lnc-HIST2H2AA3-1:1	LOC100132909	-1.26545291353235	7.58581499514656	-3.24247482627204	0.00905309283359564	0.0325946560438448	-2.98957858637555
DNAJB14	375	54	0	A_23_P213199	NM_001031723	DNAJB14	-1.26606349103684	9.11650836250434	-6.01494015848252	0.000140204562738498	0.00208013258618668	1.27651115815833
SLC7A6	325	92	0	A_24_P159312	NM_001076785	SLC7A6	-1.26688931814392	6.575985580439	-3.94047579521267	0.0028785883844378	0.0146024372400577	-1.82700452368313
HIST1H4J	114	108	0	A_23_P30805	NM_021968	HIST1H4J	-1.26771094031794	8.13834173469753	-5.32273689331369	0.000359129232618436	0.00369761056006831	0.30992955133895
PPIB	103	38	0	A_24_P304723	NM_000942	PPIB	-1.26869458409933	12.4403134599964	-9.30943217885851	3.51107104678998e-06	0.000453418081926157	5.00184374002978
AQP9	150	21	0	A_23_P106362	NM_020980	AQP9	-1.26878935697523	9.17536813227823	-3.75806031119612	0.00386312803096675	0.0178271052265582	-2.12703806661239
IGFBP7	371	22	0	A_23_P353035	NM_001553	IGFBP7	-1.26885129300577	14.9204621507481	-7.54796974106988	2.17804458896664e-05	0.000845777031966721	3.17594027747801
HNRNPF	62	101	0	A_23_P75330	NM_004966	HNRNPF	-1.26930660515569	11.7160101509857	-3.71091342581795	0.00417104758192577	0.0188409657449299	-2.20510668763913
XLOC_014513	232	73	0	A_21_P0010492	ENST00000624368	XLOC_014513	-1.26940114182259	7.02898358825113	-5.69963169217736	0.000213431425650287	0.00265989716530422	0.844987310961054
PLK4	72	84	0	A_23_P155969	NM_014264	PLK4	-1.26987434606219	7.16297702830468	-4.82156894294997	0.000740219873619073	0.00581391931853849	-0.434085751551235
CCDC85B	145	68	0	A_23_P150249	NM_006848	CCDC85B	-1.26999977567663	13.2488549100935	-6.8202597597706	5.08686006931203e-05	0.00122814495499521	2.31397659306298
LOC100505930	97	133	0	A_21_P0014437	BC033052	LOC100505930	-1.27030700586189	6.30901916482349	-2.98935622696438	0.0138700118286229	0.0445546716261143	-3.41703563474226
XLOC_l2_009273	2	50	0	A_21_P0012208	lnc-C21orf58-1:1	XLOC_l2_009273	-1.27034995422011	7.16712972322586	-6.63821406045881	6.35127634014463e-05	0.00139401729315507	2.08737755545759
HMGN5	8	78	0	A_23_P136909	NM_030763	HMGN5	-1.27140154065829	7.67074173912971	-8.00629762469984	1.31562087394764e-05	0.000658166010182995	3.68472006706626
DIAPH3	240	18	0	A_23_P162719	NM_030932	DIAPH3	-1.27190227712646	7.30323087542795	-6.1917619566714	0.000111421122307621	0.00184692982738573	1.51217025987278
PTPN11	14	124	0	A_23_P99027	NM_002834	PTPN11	-1.2744184393246	11.4318299712676	-6.94920270639837	4.35733621264125e-05	0.00112788247231347	2.47176126045197
LOC286272	139	160	0	A_33_P3735158	AK093004	LOC286272	-1.27452558549073	7.5035890878228	-6.41745906120895	8.35946213969739e-05	0.00158610797021889	1.80646298008913
MCM10	294	46	0	A_33_P3867534	NM_182751	MCM10	-1.27582773904223	7.16429945327295	-3.84424442803471	0.00336012256702399	0.016192155581155	-1.98486819752316
DTX3L	223	96	0	A_24_P941912	NM_138287	DTX3L	-1.27608126015859	7.76957907931916	-7.50882917383963	2.27623070931273e-05	0.000848316048913663	3.13130423116962
BBX	25	102	0	A_23_P121356	NM_020235	BBX	-1.27634147289068	11.7104694066767	-6.51541191178207	7.39444116610792e-05	0.00150591681401212	1.93194764501622
SCOC	352	144	0	A_24_P46334	NM_032547	SCOC	-1.27650550875575	9.18766599430204	-5.54374327596174	0.000264046970508731	0.00304201831376553	0.626234474687632
CCR1	378	94	0	A_24_P148717	NM_001295	CCR1	-1.27685682651381	9.8800744556881	-7.66692267508661	1.90683753770996e-05	0.000779434155832742	3.31043171847268
SIPA1L3	58	72	0	A_24_P202558	NM_015073	SIPA1L3	-1.27745095677529	6.80756604473286	-4.96687649719645	0.000597963261632196	0.00510780435169797	-0.214577831342753
SYT13	329	132	0	A_23_P161659	NM_020826	SYT13	-1.27810034384109	12.2703754704019	-8.1091142989328	1.17846973690709e-05	0.00062923485086972	3.79542698759862
SACM1L	246	70	0	A_23_P212383	NM_014016	SACM1L	-1.27846540451728	11.0379886697069	-6.9076529254526	4.57920085709464e-05	0.00115060191671704	2.42116121472982
SYNJ2BP	124	42	0	A_23_P65357	NM_018373	SYNJ2BP	-1.27957379884894	8.90524986974431	-5.71965717883931	0.000207726543784445	0.00262359097263462	0.872828005246685
VASN	130	123	0	A_23_P129695	NM_138440	VASN	-1.27976341866293	13.0872763360781	-5.51546883798592	0.000274538018373524	0.00311798649122962	0.58617233523263
N4BP2	267	150	0	A_23_P309779	NM_018177	N4BP2	-1.28324949456036	7.46840670367132	-4.84101371035981	0.000719252081641529	0.00571661279964992	-0.404534537171045
VANGL1	156	28	0	A_24_P199655	NM_138959	VANGL1	-1.28352679915373	10.0034419711414	-5.87123762154347	0.000169513876770551	0.00232997662798731	1.0816498382309
PRRC1	16	117	0	A_23_P92948	NM_130809	PRRC1	-1.28369073559677	9.92604160811151	-3.93386149830331	0.00290924645420533	0.0146931305945375	-1.83782391275738
SRP9	38	142	0	A_24_P66528	NM_003133	SRP9	-1.28424970543488	10.3467051537339	-7.0413135627575	3.90592581403781e-05	0.0010749634285384	2.58311655724541
LOC100507332	373	87	0	A_21_P0014237	BC042892	LOC100507332	-1.28483643307176	7.12585196235274	-3.41062879465073	0.00683753458935944	0.0266385614415666	-2.70648167151356
TTC14	125	160	0	A_23_P212511	NM_001042601	TTC14	-1.28522774005297	8.03455769922153	-7.74064087136266	1.75733510224118e-05	0.000752582145713001	3.39290974889361
C9orf3	7	136	0	A_33_P3260146	NM_001193329	C9orf3	-1.28560978332384	8.08348104427102	-4.01951644066925	0.00253739160495627	0.0133181549231632	-1.69808279828587
AP3S1	48	59	0	A_33_P3429576	NM_001284	AP3S1	-1.28576406744506	12.1762911825139	-5.41562190572002	0.000315317840724267	0.00341746612001693	0.443749951311605
ARMCX3	363	7	0	A_24_P23411	NM_016607	ARMCX3	-1.28599376729056	8.51228454512628	-7.07174576092474	3.76814112148794e-05	0.00105324602253134	2.61966034010978
CTSK	242	77	0	A_23_P34744	NM_000396	CTSK	-1.28631515919692	13.2091459675732	-3.57011169738085	0.00525256903306589	0.0222652792676449	-2.43938143107495
LTBP1	26	79	0	A_23_P43810	NM_206943	LTBP1	-1.28755788218754	7.92331395907303	-4.59467443305398	0.00103926137624879	0.00726523510991548	-0.782890639295514
SAMD11	277	135	0	A_33_P3818959	NM_152486	SAMD11	-1.28794165893164	12.0169301603987	-3.95993651462872	0.00279033702393992	0.0142764817204592	-1.7951988465609
ARHGAP44	129	2	0	A_23_P26854	NM_014859	ARHGAP44	-1.29174975372095	7.56080485119164	-3.41515225680605	0.0067863442201315	0.0264824802912089	-2.69888438101839
AHCYL1	26	119	0	A_24_P11307	NM_006621	AHCYL1	-1.29348134113315	12.2212204388353	-6.38604909897494	8.69708418261736e-05	0.00162063451228437	1.76593925125062
HSP90B3P	8	96	0	A_33_P3401252	ENST00000415545	HSP90B3P	-1.29382496359469	13.1242121904328	-6.82243707656943	5.07349625285919e-05	0.00122669628557883	2.31665949546196
SLC16A7	35	133	0	A_32_P130630	NM_004731	SLC16A7	-1.29385374814438	6.77769179605428	-6.16648155618556	0.000115113165592643	0.00186680862647166	1.47875392275487
UBR5	280	37	0	A_32_P159400	NM_015902	UBR5	-1.29585976888509	7.79878769462976	-4.11765724832615	0.00217194566412106	0.0119809413306599	-1.53899225237755
LOC100170939	20	11	0	A_21_P0012944	NR_024054	LOC100170939	-1.29690228251762	9.04515963069988	-5.30944516846272	0.000365914556855874	0.00374893641000124	0.290675308954169
RNF112	17	60	0	A_23_P107116	NM_007148	RNF112	-1.29891798952359	10.8633619046175	-4.28204514518999	0.00167872651145197	0.0100814365372308	-1.27510431105845
MTM1	224	143	0	A_23_P62133	NM_000252	MTM1	-1.30019634562571	6.7125686892581	-4.14477494157266	0.00208106319999094	0.0116807384934801	-1.49523295448052
NBN	329	117	0	A_24_P278126	NM_002485	NBN	-1.30381208935549	8.81007692042056	-4.84672374413485	0.000713215756269622	0.00568509793544544	-0.39586705377289
CECR5-AS1	162	143	0	A_32_P131143	NR_024482	CECR5-AS1	-1.30425842752168	8.092044192917	-3.77700670464761	0.0037461663890339	0.0174663828365284	-2.0957229812783
YIPF4	354	59	0	A_23_P424080	NM_032312	YIPF4	-1.30527554617774	8.40863514741147	-7.22006814311815	3.16797051345838e-05	0.000975512398959393	2.79603522945645
WDR82	4	99	0	A_23_P109877	NM_025222	WDR82	-1.30569821248493	9.26511308859173	-8.48010554998224	7.99062922239837e-06	0.000571219561299982	4.18486365929319
FAM120A	10	84	0	A_24_P941505	NM_014612	FAM120A	-1.30577884141851	10.6772328987263	-7.93212297200831	1.42532620723031e-05	0.000670031314089231	3.60408621406474
ARF5	283	14	0	A_33_P3260777	NM_001662	ARF5	-1.30610424334243	13.9648841119695	-7.24030061302424	3.09448753527319e-05	0.000962637583301879	2.81987293030838
CHD9	5	59	0	A_24_P942250	NM_025134	CHD9	-1.3071294210665	10.0985035923404	-7.39380577669001	2.59367997846592e-05	0.000899645321004085	2.99902201207008
ENAH	46	28	0	A_32_P87568	NM_001008493	ENAH	-1.30896238495533	9.34887471363409	-6.36074284375996	8.97981897302981e-05	0.00164751987083374	1.73318900339569
SMS	168	14	0	A_21_P0013088	NM_001258423	SMS	-1.31068043134064	12.5808415398678	-8.1147776347946	1.17138135918576e-05	0.00062923485086972	3.80148932808301
TNRC6B	174	16	0	A_23_P6490	NM_015088	TNRC6B	-1.31129442341558	7.73677497075217	-7.51255410956927	2.26668260394753e-05	0.000848316048913663	3.13556037219175
GOPC	137	99	0	A_23_P58877	NM_020399	GOPC	-1.3117437133642	12.3069876697953	-4.37568565429077	0.0014520343254965	0.00914409385938636	-1.12631072967132
PAM	145	101	0	A_23_P213678	NM_000919	PAM	-1.31290047408729	13.5282168855838	-8.22657891968545	1.04053920150324e-05	0.000598546269218301	3.92041371005203
HEXB	87	151	0	A_23_P156049	NM_000521	HEXB	-1.3130176295504	13.368339483656	-6.62240371684999	6.47616668720733e-05	0.00140868160517447	2.06748356524157
ALKBH5	332	54	0	A_33_P3239854	NM_017758	ALKBH5	-1.31388717308189	9.90924816604663	-5.99000316520691	0.000144871133299075	0.0021188834149511	1.24291229989163
MTPN	174	85	0	A_24_P55465	NM_145808	MTPN	-1.31573240584477	12.7808753549685	-8.29048383936401	9.72964309058881e-06	0.000586356905133084	3.98775083819697
LOC158863	301	103	0	A_33_P3576797	AL110203	LOC158863	-1.31722331620664	6.53641148007881	-4.69398694855154	0.000895011042228554	0.00661087001968052	-0.629321448645049
C5orf4	214	155	0	A_23_P501831	NM_032385	C5orf4	-1.31800063253993	8.07667684505777	-3.07880538494388	0.0119232085191426	0.0397894091987974	-3.26593240689702
NUDT7	119	131	0	A_23_P3602	NM_001243657	NUDT7	-1.31800162799385	7.62965680980003	-6.03402260803946	0.000136743070452988	0.00204856367866576	1.30216088997572
FAP	272	45	0	A_23_P56746	NM_004460	FAP	-1.31841995917817	12.8922613962071	-6.38673214546756	8.68958740953676e-05	0.00162063451228437	1.7668219667084
PRKCI	339	7	0	A_33_P3294578	NM_002740	PRKCI	-1.3186732107498	10.6160578977225	-4.92949944058944	0.000631523869395503	0.00530805052485352	-0.270748430400538
PSD3	57	96	0	A_23_P20392	NM_015310	PSD3	-1.31912141454694	10.1351395923229	-5.84484649333054	0.000175581300365796	0.00237999095426672	1.04553530079918
TMCO3	40	70	0	A_33_P3247255	NM_017905	TMCO3	-1.31962724423238	9.45054372910591	-6.17487795882491	0.000113872487637178	0.00185784887243341	1.48986269809476
RPL23AP32	5	49	0	A_23_P108932	NR_002229	RPL23AP32	-1.3211113942256	7.39535604885225	-3.55762330968784	0.00536165070505741	0.0225782960302203	-2.46023535076979
C4orf49	250	1	0	A_23_P255331	NM_032623	C4orf49	-1.32148441624416	9.4495475959806	-5.92933656753025	0.000156937747001507	0.0022281663234628	1.16079515180829
ELAVL1	279	56	0	A_23_P388681	NM_001419	ELAVL1	-1.32167184224952	7.42460428626985	-8.60695208614231	7.01787516735331e-06	0.00055146019216221	4.31451043457926
TOPORS	374	157	0	A_23_P32217	NM_005802	TOPORS	-1.32195777570371	8.2287086199912	-6.35823917520186	9.00832651465548e-05	0.00165093191867597	1.72994394484392
P4HA1	136	104	0	A_33_P3214481	NM_001142595	P4HA1	-1.32272649467319	12.6177030046211	-8.92676932160363	5.09245190837806e-06	0.000496112025389884	4.63374187111022
RGS17	141	148	0	A_23_P156861	NM_012419	RGS17	-1.3239797825163	7.25500245068034	-4.90551881926781	0.000654110595866939	0.00540991410079236	-0.30689383090866
C6orf174	331	140	0	A_33_P3284453	NM_001012279	C6orf174	-1.32405113420013	7.28920288414247	-5.26270434691194	0.000390887841304129	0.00391569485765814	0.22275900757127
UBL3	271	44	0	A_23_P140029	NM_007106	UBL3	-1.32456300648825	8.81989181234858	-6.70361706791603	5.86164961956311e-05	0.00133400575153418	2.16930819411107
CFB	35	8	0	A_23_P156687	NM_001710	CFB	-1.32932704459751	8.50957604157626	-3.91762700949076	0.00298595717610909	0.0149558209852079	-1.86439941056728
LY6D	95	125	0	A_33_P3268622	NM_003695	LY6D	-1.32939741306973	8.32469744436227	-3.53399233942346	0.00557455022183171	0.0232108053350399	-2.49972655077685
NUCB2	155	138	0	A_23_P13364	NM_005013	NUCB2	-1.32996596173329	12.4015054875214	-8.08375167523556	1.21079204566184e-05	0.000636171317165948	3.7682320165228
NEK1	264	32	0	A_23_P124427	NM_012224	NEK1	-1.33053468331428	7.64075896748843	-7.78695177390846	1.66996358492671e-05	0.000734034917184539	3.44438675837236
XLOC_l2_003021	284	25	0	A_21_P0011047	ENST00000539977	XLOC_l2_003021	-1.33095283400552	11.8626746282117	-5.69931593496939	0.000213522717299564	0.00265989716530422	0.844547851444693
TNC	287	57	0	A_23_P157865	NM_002160	TNC	-1.33109061709171	10.3111197699095	-5.18508575495661	0.000436481102809502	0.00416218585672782	0.109260979422094
TMED4	137	149	0	A_24_P163537	NM_182547	TMED4	-1.33149205134464	9.72394218692563	-8.23748432661647	1.0286548515864e-05	0.000597085755142083	3.93193755439799
DAAM1	257	13	0	A_23_P54116	NM_014992	DAAM1	-1.33305534133815	7.87321670945852	-4.66362389088041	0.000936708071126839	0.00682616787266055	-0.676125739572177
DCK	298	70	0	A_24_P89080	NM_000788	DCK	-1.33336151630867	8.404909601847	-4.25599301382449	0.00174824407361951	0.0103644121076254	-1.3167010737014
MATN2	295	52	0	A_23_P71328	NM_030583	MATN2	-1.33388306396271	9.94905407781375	-8.56114970820204	7.3533666094531e-06	0.000561096212910625	4.26789890147733
SYNPO2	346	123	0	A_33_P3390868	NM_133477	SYNPO2	-1.33392511018731	6.46008191909283	-3.72294962329062	0.0040900779765616	0.0185810223647504	-2.1851573869712
LOC100131564	63	116	0	A_21_P0001550	NR_034089	LOC100131564	-1.33609736104799	7.41478477521149	-5.83711002214605	0.000177403962517282	0.00239107816470501	1.03492908734413
RWDD4	328	40	0	A_32_P76156	NM_152682	RWDD4	-1.3369040214991	7.32670477866341	-5.91640759959199	0.000159646773644644	0.00225004704073276	1.14322535061915
EP300	56	103	0	A_23_P40693	NM_001429	EP300	-1.33747162448993	7.15796355527572	-8.45154500618985	8.22934718242365e-06	0.000571219561299982	4.15542992845117
XLOC_l2_001953	249	94	0	A_21_P0010944	TCONS_l2_00004169	XLOC_l2_001953	-1.33795071806998	6.61644920367957	-3.44792199424503	0.00642715067625754	0.0255414845218927	-2.64388087581493
CBX6	236	107	0	A_33_P3270485	ENST00000407418	CBX6	-1.33815947955302	11.8704065996374	-6.59792059723216	6.67483965802235e-05	0.00143122319977286	2.03660862732695
HIST1H4L	23	73	0	A_33_P3351851	NM_003546	HIST1H4L	-1.33953655447419	8.31138399028729	-3.17665809362307	0.0101108800470196	0.0352747959588061	-3.10065388917656
DDX3X	194	31	0	A_24_P126060	NM_001356	DDX3X	-1.34017788670747	10.5127266333962	-6.87351806293769	4.77063787215485e-05	0.00117739342684782	2.37941826975256
ERGIC2	20	142	0	A_23_P139509	NM_016570	ERGIC2	-1.34036720449842	11.2876951676146	-7.24084652526569	3.09253062163786e-05	0.000962637583301879	2.82051538741357
GPBP1L1	3	28	0	A_23_P593	NM_021639	GPBP1L1	-1.34063995143899	9.65203893045577	-7.26652829824829	3.00197051541294e-05	0.000952568129833605	2.85069564222526
RB1CC1	239	164	0	A_23_P9056	NM_014781	RB1CC1	-1.34149512797136	10.985000061513	-5.5093187632047	0.000276878711402811	0.00313350710139906	0.577442576138444
FAM63B	24	77	0	A_23_P379327	NM_001040450	FAM63B	-1.34247727763157	8.45889562334188	-6.35523114285244	9.04270627241994e-05	0.0016517811819325	1.72604399689458
YIPF6	320	33	0	A_23_P431319	NM_173834	YIPF6	-1.34264296936167	11.7125301429622	-8.08381556193128	1.21070942581388e-05	0.000636171317165948	3.76830061225275
KIAA0146	55	132	0	A_24_P143686	NM_001080394	KIAA0146	-1.34325179371053	9.17735919093947	-6.45966284755657	7.92793781583703e-05	0.0015428915429209	1.86069390437942
LZTFL1	312	90	0	A_24_P37519	NM_020347	LZTFL1	-1.34393738063809	9.24634366283104	-3.82693313169749	0.00345535534941211	0.0165172926157407	-2.01336708495953
SLAIN2	9	113	0	A_23_P303423	NM_020846	SLAIN2	-1.34517688391173	7.03981091120184	-4.96898265108301	0.000596129720559524	0.00509801078788558	-0.211418746960247
LRP12	68	112	0	A_23_P8906	NM_013437	LRP12	-1.34549285046824	9.66636174609801	-7.44070195808499	2.45879443812752e-05	0.000874208063440477	3.05315550726025
SLC23A2	312	4	0	A_24_P254278	NM_203327	SLC23A2	-1.34611320062471	8.18992230292161	-3.6904349828461	0.00431267763943166	0.0192872206161858	-2.23907782480524
PRELID2	218	126	0	A_24_P346101	NM_138492	PRELID2	-1.34667799135697	8.1822893979303	-7.97470630375165	1.361179021586e-05	0.000661104411679334	3.65045679807419
DPP4	363	130	0	A_33_P3287223	NM_001935	DPP4	-1.34733731384326	11.0979008768098	-3.50070134635079	0.00588948829524213	0.0240314192149393	-2.55542678743014
LOC100130000	347	94	0	A_33_P3245480	NR_111950	LOC100130000	-1.34749600450543	6.82662901030849	-4.47499457831436	0.00124664210817351	0.0082542968521711	-0.969769739789078
RBM27	55	22	0	A_23_P92786	NM_018989	RBM27	-1.34804227980783	10.0885629375447	-8.22529352196722	1.0419498053503e-05	0.000598546269218301	3.9190545284809
ADNP2	371	43	0	A_23_P164468	NM_014913	ADNP2	-1.34991056493331	7.73079285704994	-4.63671623046689	0.000975388232489752	0.00700442455510107	-0.717711900237995
ST3GAL5	370	54	0	A_23_P136573	NM_003896	ST3GAL5	-1.35064976038674	6.51890606223826	-8.00659329309826	1.31520240451504e-05	0.000658166010182995	3.68504019043138
XLOC_004144	254	45	0	A_21_P0003792	lnc-NAF1-1:1	XLOC_004144	-1.35227618223662	6.93697523287194	-3.20520083689722	0.0096373683964405	0.0340651220276474	-3.05247092923767
PNISR	44	153	0	A_23_P122615	NM_032870	PNISR	-1.35457159314382	8.38417703657592	-3.08495954592119	0.0117999897238293	0.0395472306525151	-3.25553540790156
LOC100507131	27	143	0	A_21_P0014806	XR_132626	LOC100507131	-1.35463950133335	6.80818105353246	-5.03582195241602	0.000540951901422282	0.00479747333830546	-0.111501443372449
EHBP1	370	63	0	A_33_P3343957	NM_015252	EHBP1	-1.35465141666813	7.71299234643428	-6.13098444491576	0.00012052186143035	0.00191398826460268	1.43167781023756
LOC100653004	264	42	0	A_19_P00317237	lnc-AC114947.1.1-2:1	LOC100653004	-1.35597721828451	8.18226891947675	-4.75156338684192	0.000821269722128783	0.00626443786673232	-0.540926220850897
ARSK	137	7	0	A_23_P312536	NM_198150	ARSK	-1.35889268017656	6.98410328854194	-7.42002683438292	2.51729851322581e-05	0.000881507860090658	3.02932385211104
SYT1	48	93	0	A_23_P36795	NM_005639	SYT1	-1.36019580497592	6.80838281981837	-6.4495636571507	8.02896173124854e-05	0.00155709515111606	1.84773943060444
ATPAF1	319	107	0	A_24_P919899	ENST00000576409	ATPAF1	-1.36188223130336	6.23200688014935	-5.81124208865671	0.000183647708313407	0.00244428185961752	0.999401988306095
MECOM	69	96	0	A_23_P317324	NM_005241	MECOM	-1.36195679861581	7.40442405448692	-8.68950787754175	6.4545363562961e-06	0.000540332267133351	4.39795351937804
PPP3CA	155	73	0	A_24_P414371	NM_000944	PPP3CA	-1.36289926247233	10.2103293613256	-7.1161866514688	3.57631137294903e-05	0.00104048930513601	2.67280756857519
SLC30A9	204	154	0	A_23_P30050	NM_006345	SLC30A9	-1.36341271297318	8.64414205686682	-8.86012941273359	5.44022623857652e-06	0.000503492938380257	4.5681116846918
TMEM219	122	146	0	A_23_P77562	NM_194280	TMEM219	-1.36353633470996	9.82090132012043	-6.68777839554145	5.97635319334326e-05	0.00134522263086322	2.14952088646861
NMD3	325	113	0	A_23_P32861	NM_015938	NMD3	-1.36355711483376	8.9065095742872	-3.43559673974577	0.00655988213473613	0.0258898546511654	-2.66456142832207
HIST1H4H	10	119	0	A_23_P323685	NM_003543	HIST1H4H	-1.36461770204761	8.07831981183363	-4.51002824685932	0.00118173437128586	0.00796057941417352	-0.914862179718844
USP8	6	111	0	A_23_P129058	NM_005154	USP8	-1.36495717085507	9.28099315122844	-8.11115484409675	1.17591037163744e-05	0.00062923485086972	3.79761172377084
BMPR2	358	12	0	A_24_P753161	NM_001204	BMPR2	-1.36826500576204	7.76689763488053	-5.66976204328682	0.000222256094421878	0.00272849246645104	0.803350631806056
CA9	83	136	0	A_23_P157793	NM_001216	CA9	-1.36839720837434	11.8987256002321	-5.98330318137777	0.000146153273824158	0.00213576086722514	1.23386966523029
LOC100505592	339	134	0	A_21_P0009442	NR_110429	LOC100505592	-1.36960775891402	10.9106235903225	-4.17609428347298	0.00198106541381998	0.0113061215240929	-1.44480388668141
CAV1	10	116	0	A_23_P134454	NM_001753	CAV1	-1.36994242662698	12.8144763682399	-4.69338468575646	0.000895818645180609	0.00661207036334238	-0.630248565583757
EFEMP1	141	137	0	A_23_P501007	NM_001039348	EFEMP1	-1.37362551872384	12.2079184812416	-5.5557777197377	0.000259713038431037	0.0030070816408146	0.643250154352914
GANAB	57	3	0	A_23_P203406	NM_198335	GANAB	-1.3742518715287	13.4781704709556	-9.70786315388994	2.41517443230686e-06	0.000386869142959615	5.36984806700876
LOC100506948	106	32	0	A_19_P00319990	lnc-SNURF-1:4	LOC100506948	-1.37530008258324	8.58614614386854	-3.22220474281883	0.00936616613855541	0.0333684691407602	-3.02377565093156
NHS	96	45	0	A_32_P126375	NM_198270	NHS	-1.3768230103538	8.19029572391651	-7.52975910079329	2.22314220953307e-05	0.000847841933454762	3.15519650189758
STAG2	198	109	0	A_33_P3304293	NM_001042751	STAG2	-1.37838410040558	8.74350671829791	-5.34760560865859	0.000346793466336545	0.00362663675812963	0.345883689147438
DLG1	140	71	0	A_33_P3224380	NM_001098424	DLG1	-1.37892260920089	8.54946550362099	-7.65192195153927	1.93892101396552e-05	0.000781766566721175	3.29356734006034
PARP14	126	27	0	A_24_P161018	NM_017554	PARP14	-1.38065842584175	8.20480090666984	-7.31446913962438	2.84052565397334e-05	0.000933339583225679	2.90680742047568
RCN2	224	146	0	A_32_P175539	NM_002902	RCN2	-1.38069340111759	12.2934170597685	-7.3282157407061	2.79598985669391e-05	0.000930814991367897	2.92284273673072
RAB27A	359	149	0	A_24_P373174	NM_004580	RAB27A	-1.38200094896996	8.74365010379542	-9.48152995758248	2.98239974688066e-06	0.000421049130366822	5.16266193790287
DPY19L1P1	28	59	0	A_24_P453921	NR_036680	DPY19L1P1	-1.38277795423488	6.80274695107005	-6.04157463774695	0.000135398703694946	0.00204155657416897	1.31229738118989
RAB22A	356	76	0	A_33_P3221788	NM_020673	RAB22A	-1.38277834729928	11.8964723059302	-5.03443397061289	0.000542040534581707	0.00480311343914715	-0.113569666751449
DPYSL2	168	121	0	A_24_P38347	NM_001386	DPYSL2	-1.38336025261906	10.5363382612804	-6.5744739332477	6.87129565873457e-05	0.00145265119770126	2.00696301000176
ALG11	326	110	0	A_33_P3230876	NM_001004127	ALG11	-1.38712078722827	7.35088844678578	-5.811407891836	0.000183606943208612	0.00244428185961752	0.999630015819636
MAFB	188	46	0	A_23_P17345	NM_005461	MAFB	-1.38733073516004	7.85034965334119	-3.2437559444835	0.0090336711517159	0.0325458321186062	-2.98741764738372
AKAP10	362	131	0	A_23_P317105	NM_007202	AKAP10	-1.39077657704951	7.96161164855713	-5.67090774729936	0.000221910467184843	0.00272849246645104	0.804950111967998
GNPTAB	142	88	0	A_24_P281975	NM_024312	GNPTAB	-1.39487344812832	9.95844005774299	-4.79270813237167	0.000772550931862405	0.00600065003540759	-0.478047242723332
TCERG1	120	154	0	A_23_P133365	NM_006706	TCERG1	-1.39592016946132	8.93629371088322	-3.39860921776186	0.00697550617593117	0.027030694902265	-2.72667426944678
SCARNA2	92	154	0	A_33_P3273584	NR_003023	SCARNA2	-1.3962233336074	7.6535034089443	-3.32450361378864	0.0078921834832912	0.0294465238122128	-2.85132873261242
RNU11	22	159	0	A_21_P0000502	NR_004407	RNU11	-1.39683644119443	6.64976739927401	-3.2416747852973	0.00906524319349453	0.0326243003587007	-2.99092808837425
FAM72A	117	69	0	A_33_P3242952	NM_001123168	FAM72A	-1.39932671700182	7.80642130216243	-3.88113603361591	0.0031662324671785	0.0155915656726948	-1.9242356243383
CUL4B	210	161	0	A_23_P148463	NM_003588	CUL4B	-1.39985909280217	9.97910003473102	-6.49914996914463	7.54593385855119e-05	0.00151470124229324	1.91120787662307
TOB1	177	37	0	A_23_P164179	NM_005749	TOB1	-1.40054910627604	8.46118960143221	-6.05209770167306	0.000133549161163875	0.00202764955801766	1.32640786905091
TMEM194A	25	163	0	A_24_P126628	NM_015257	TMEM194A	-1.40201636935108	9.95552507158518	-5.13534662215499	0.000468668642341221	0.00436663921295437	0.036061303087437
SLC39A6	29	102	0	A_24_P156049	NM_012319	SLC39A6	-1.40239417987627	7.42949586537195	-10.4940250719906	1.19665170624021e-06	0.000306155985914551	6.05340516205963
SLC30A7	135	23	0	A_23_P22915	NM_133496	SLC30A7	-1.40279181963257	8.5807335119963	-7.68310826137696	1.87286582239034e-05	0.000772279003346553	3.32859731422986
BMS1P5	225	136	0	A_21_P0010878	TCONS_l2_00003558	BMS1P5	-1.40294251892238	7.28838342474789	-3.22772776683314	0.00927977484644724	0.0331528563514829	-3.01445677911466
SS18	291	86	0	A_23_P141738	NM_001007559	SS18	-1.40364057599854	9.7639402660643	-7.94413614074024	1.40690297234453e-05	0.000667172623585799	3.61718944295379
PGRMC2	360	5	0	A_23_P155868	NM_006320	PGRMC2	-1.40580499210456	11.4933494555195	-8.55811596174951	7.37619728839827e-06	0.000561096212910625	4.26480352730725
HMGCS1	159	135	0	A_24_P63522	NM_002130	HMGCS1	-1.40908747363143	8.83259631794305	-3.95701714976652	0.00280339266304122	0.0143300762115998	-1.79996750190223
PAPOLA	194	143	0	A_23_P376239	NM_032632	PAPOLA	-1.41056258990478	7.35125704739981	-7.93050758399009	1.42782349781906e-05	0.000670031314089231	3.60232294797549
MEX3B	220	83	0	A_24_P65060	NM_032246	MEX3B	-1.41229419961299	7.6003253964185	-6.02655528452028	0.000138086519118155	0.00206127537812666	1.29212995892492
FBXO4	61	116	0	A_24_P171873	NM_012176	FBXO4	-1.41275416204994	8.31641708492157	-7.17700306775961	3.33076306307743e-05	0.000999769042663186	2.74512015471532
PFN2	133	153	0	A_23_P253301	NM_053024	PFN2	-1.41283383301032	11.8656546222014	-6.58584456569299	6.77525283261223e-05	0.00143965480788887	2.02134937866231
LAMA4	291	136	0	A_33_P3391603	NM_001105209	LAMA4	-1.41343229622053	8.43179754181603	-4.9481224917254	0.000614557833729014	0.00520483932490679	-0.242736077996376
TROVE2	98	122	0	A_24_P222684	NM_001042369	TROVE2	-1.41483218943215	10.3211308220827	-6.92933432459222	4.4619389893417e-05	0.00113310124425981	2.44759397249675
FLJ45482	5	75	0	A_33_P3356525	AK127393	FLJ45482	-1.41639825300232	8.67101530240365	-4.49301090523163	0.00121280315481168	0.00810757935634339	-0.941512314542262
MAD2L1	370	146	0	A_23_P92441	NM_002358	MAD2L1	-1.41837173643547	9.97456399997016	-6.18780961944329	0.000111989807074253	0.00184899722106044	1.50695199966805
NRIP1	165	69	0	A_33_P3251430	NM_003489	NRIP1	-1.41865217646947	9.9720439660476	-6.26364119717997	0.000101604514127223	0.00175640453233596	1.60668206507529
SLC35B3	312	50	0	A_23_P145463	NM_015948	SLC35B3	-1.41897556427315	7.6664642898017	-7.97925181664206	1.35451946606329e-05	0.000659793560969248	3.65539397340543
LCTL	176	63	0	A_33_P3357678	NM_207338	LCTL	-1.41906326312001	9.16336845586063	-4.33422277360784	0.00154813410959178	0.00953080788310768	-1.19205454915944
RUNX2	150	14	0	A_33_P3316508	NM_001015051	RUNX2	-1.42292834596969	7.96662253999582	-4.7301342377793	0.000847930096907687	0.00639633789049742	-0.573770709756759
DCAF12	201	30	0	A_23_P255257	NM_015397	DCAF12	-1.42636572550398	8.13857820887845	-5.17963204763818	0.00043989198309593	0.00418035399109818	0.10125275627342
DKFZp761E198	329	82	0	A_24_P9883	NM_138368	DKFZp761E198	-1.42759779829127	7.12434614461041	-7.0041295829477	4.08174104979959e-05	0.00109673748626792	2.53829920076183
SYTL2	246	124	0	A_23_P53193	NM_032943	SYTL2	-1.42767030095771	10.0074407421227	-5.06391071754512	0.000519415857599602	0.00470013512859955	-0.0697073262616303
ASAP1-IT1	349	55	0	A_23_P146325	NR_002765	ASAP1-IT1	-1.42779683154017	7.36254802113612	-4.40241283787487	0.00139345109336999	0.00891239754391589	-1.08405152846486
ID1	199	58	0	A_23_P252306	NM_002165	ID1	-1.42962122995089	15.1787216383881	-2.95235390408735	0.0147673533169106	0.0465750357641828	-3.47951431633539
DYNC1LI2	168	112	0	A_24_P236445	NM_006141	DYNC1LI2	-1.42995934639116	8.70069392617512	-7.86825522989436	1.52778378740862e-05	0.000699212915231875	3.53413629671051
LOC340335	151	58	0	A_33_P3812038	AK074459	LOC340335	-1.43315603743536	9.33562052683578	-6.26257871056154	0.000101742624029306	0.00175640453233596	1.60529040919953
LOC100129387	128	33	0	A_33_P3333777	NR_024490	LOC100129387	-1.43465285147293	7.49687715837062	-4.66968667282701	0.000928219966968088	0.00677913916252581	-0.666769657893097
ZMYM2	7	34	0	A_24_P237757	ENST00000382881	ZMYM2	-1.4349186618015	8.79883503385704	-3.71201023148748	0.00416360035229417	0.0188175307294814	-2.20328826355987
MIS18BP1	143	79	0	A_23_P364107	NM_018353	MIS18BP1	-1.43641898082274	8.13877423518779	-4.02239482575508	0.00252579910232674	0.0132819719841102	-1.69340103224849
XKR6	263	30	0	A_23_P387000	NM_173683	XKR6	-1.43846811873082	6.48224508433041	-10.2335024958352	1.50258262356356e-06	0.000318741857874705	5.83288684822832
GLS	134	129	0	A_23_P39766	NM_014905	GLS	-1.44028679995236	9.78281079341479	-4.36684206675762	0.00147198825655513	0.0092361025860459	-1.14031431924738
PRUNE2	11	138	0	A_33_P3294921	NM_015225	PRUNE2	-1.44058107584811	8.86730540626234	-6.17341753140334	0.000114087243922167	0.00185784887243341	1.48793122189453
GNG10	24	88	0	A_23_P112251	NM_001017998	GNG10	-1.44256112615228	12.1270110440166	-7.95993710289243	1.38306422567264e-05	0.000663044323644574	3.63439825152402
USP42	111	79	0	A_24_P135276	NM_032172	USP42	-1.44296781597303	9.63222822748647	-4.14634592046179	0.00207592259231231	0.0116617672674659	-1.49270060118099
MGP	37	137	0	A_33_P3361636	NM_001190839	MGP	-1.44367131805883	8.26337110748409	-3.48627536475819	0.00603164308020484	0.0244956465317242	-2.57958621227829
RBL2	38	130	0	A_24_P416159	NM_005611	RBL2	-1.44394991343477	9.98825052779182	-6.30429468931149	9.64691990083464e-05	0.001720642811863	1.65980964372115
TMEM123	329	32	0	A_24_P309415	NM_052932	TMEM123	-1.44420779809718	11.8666924620806	-6.42116183787282	8.32060437594118e-05	0.0015819898870969	1.81123098182417
SLC7A8	302	76	0	A_23_P205489	NM_182728	SLC7A8	-1.44487603393838	6.92230009897888	-5.04012379652975	0.000537592660513376	0.00478350081965572	-0.105093087192338
ZHX1	212	132	0	A_23_P43150	NM_001017926	ZHX1	-1.44554071839143	8.78570468314221	-8.03478578049856	1.27595820106199e-05	0.00065605517504604	3.71551758016217
EP400	202	148	0	A_23_P253158	NM_015409	EP400	-1.44813087982744	8.73334209859321	-5.90853580551987	0.000161320805031927	0.00226788463377795	1.13251602703504
S100A2	348	9	0	A_33_P3376249	NM_005978	S100A2	-1.45170541315145	11.6899640623061	-6.66652601269987	6.1340959617113e-05	0.00136404066042541	2.12291617386587
C4orf34	25	49	0	A_23_P112634	NM_174921	C4orf34	-1.45316759149093	10.0857567288248	-8.65855882732824	6.65972929695703e-06	0.000544826866603699	4.36675754456836
CEP350	126	116	0	A_33_P3244863	NM_014810	CEP350	-1.45429089872099	7.34706237282963	-8.86522777868354	5.41272441316371e-06	0.000503492938380257	4.57314911597331
SHPRH	77	69	0	A_23_P337790	NM_001042683	SHPRH	-1.45774118169094	7.91219605859963	-5.3002178821854	0.000370705746519101	0.00377942902769994	0.277293354602984
CD24	172	78	0	A_33_P3369844	NM_013230	CD24	-1.45849534840435	13.3819741233819	-5.06188017972098	0.000520941549717188	0.00470627184204915	-0.0727247377260856
TMCO1	175	129	0	A_23_P355067	NM_019026	TMCO1	-1.46191235760556	10.0413678583518	-8.24142741788542	1.02439425014418e-05	0.000597085755142083	3.93610093272969
MAT2B	347	4	0	A_23_P81408	NM_182796	MAT2B	-1.46795756359419	8.28061665380216	-5.85983282510721	0.000172107719056336	0.00235508291929717	1.06605564417758
SCARNA17	63	65	0	A_32_P37592	NR_003003	SCARNA17	-1.46813615267835	12.3540252778671	-3.43593100744085	0.00655624518275802	0.0258874270272421	-2.66400044402136
PLOD2	244	158	0	A_33_P3318581	NM_182943	PLOD2	-1.46843760031681	14.2106179163655	-3.8137792163309	0.00352960497128802	0.0167520482098824	-2.03504163372265
C16orf87	333	70	0	A_23_P49279	NM_001001436	C16orf87	-1.47093658744387	9.51436546087844	-6.25665870443188	0.000102515871057555	0.0017642684875494	1.59753337657766
XLOC_004323	312	1	0	A_19_P00318559	ENST00000512067	XLOC_004323	-1.47100044127567	7.07639305235486	-6.96321043820902	4.28518706817043e-05	0.00112067396183126	2.48876820421371
XLOC_l2_007271	90	94	0	A_21_P0011796	ENST00000342073	XLOC_l2_007271	-1.47698693833534	10.6191720541721	-4.49699741983664	0.00120544800610694	0.00807136588976506	-0.935265672971655
SPTLC2	115	116	0	A_24_P150486	NM_004863	SPTLC2	-1.4789653426566	7.90614181823293	-9.23284368341747	3.77854692089016e-06	0.000473284309436911	4.92934428296531
PAR-SN	338	137	0	A_33_P3418668	NR_022011	PAR-SN	-1.479793524985	9.85111198595789	-3.00641617235837	0.0134751767846241	0.0435635493993891	-3.38822207800018
GALNT1	176	116	0	A_23_P306105	NM_020474	GALNT1	-1.48027925609526	9.74209794514167	-6.48741973035858	7.65729259430293e-05	0.0015167994926099	1.89622471946186
COTL1	254	29	0	A_24_P416131	NM_021149	COTL1	-1.48137668579326	12.9598561160036	-6.49109026461457	7.62225727042151e-05	0.00151526472396124	1.90091519844393
M6PR	67	37	0	A_23_P204252	NM_002355	M6PR	-1.4824579424539	10.2408671878491	-5.83740388022306	0.000177334360525393	0.00239107816470501	1.03533210864989
MAN1A1	331	76	0	A_33_P3303414	NM_005907	MAN1A1	-1.48362284906491	10.4135690787012	-5.22660945321747	0.000411421226929793	0.00401515302836756	0.170090091119671
MEST	255	118	0	A_23_P156970	NM_002402	MEST	-1.48408026446403	8.97847610202735	-6.91176040652372	4.55673204664863e-05	0.00114842056225597	2.4261736556819
XLOC_l2_013580	243	73	0	A_21_P0013264	NR_125718	XLOC_l2_013580	-1.4842560467475	6.44728538363547	-6.15971848895586	0.000116123104305223	0.00187439766456156	1.4697987495419
CSGALNACT1	324	23	0	A_23_P134835	NM_018371	CSGALNACT1	-1.48439838190196	8.59598040558282	-7.79497352435807	1.65531520773824e-05	0.000731456128533458	3.45327708133299
CCNG1	90	102	0	A_33_P3232277	NM_004060	CCNG1	-1.48568827756028	10.2834012347572	-3.76879395508672	0.00379640483921089	0.0176266187894131	-2.10929310073146
CNOT8	19	161	0	A_23_P110846	NM_004779	CNOT8	-1.48788786014935	9.42181023059849	-8.05303329571083	1.25123783752923e-05	0.000647047834751263	3.73519458738243
LITAF	279	16	0	A_23_P3532	NM_004862	LITAF	-1.48813839765275	9.67783430379173	-8.35794947189111	9.06772927693578e-06	0.00057790428541351	4.05834071301303
LRRC58	221	90	0	A_32_P190049	NM_001099678	LRRC58	-1.48976002285218	9.81964339724959	-4.04050608708784	0.00245412358874991	0.0130492323220507	-1.66396417426637
CLDND2	104	37	0	A_23_P374902	NM_152353	CLDND2	-1.49429719411123	8.29242719571772	-3.34963218991836	0.00756815748652583	0.0285891010358353	-2.80903057308497
FRMD3	164	113	0	A_33_P3363420	NM_174938	FRMD3	-1.49573286668896	8.84726200357861	-5.53021480555373	0.00026901187139238	0.00307191502799942	0.607080733650275
HSPA2	287	61	0	A_23_P88303	NM_021979	HSPA2	-1.4958007709338	9.45779900281966	-3.45049345840805	0.00639981095177434	0.0254936515173622	-2.63956733803079
APPL1	157	157	0	A_23_P166663	NM_012096	APPL1	-1.49656769436138	9.97033106652827	-8.3188136721141	9.44549639050457e-06	0.000580929187521591	4.01745477878744
KIAA0182	373	123	0	A_23_P152420	NM_014615	KIAA0182	-1.49692797187594	7.62030209082161	-4.9373931039757	0.000624272297075961	0.00526614525253061	-0.25886880204601
WISP2	75	31	0	A_23_P102611	NM_003881	WISP2	-1.4973069594998	13.0476283681223	-5.71431696276948	0.000209231654748149	0.00263660373407671	0.865409485729751
TRAM2	332	160	0	A_24_P12413	NM_012288	TRAM2	-1.49751604657133	11.5110817526634	-4.86415108706859	0.000695124194375644	0.00560041533934212	-0.369442508985353
SZT2	222	32	0	A_33_P3373139	ENST00000470139	SZT2	-1.50144316936784	6.6015339986202	-3.18376183082076	0.00999084376853419	0.0349879054740406	-3.08866047500393
COL8A1	157	15	0	A_23_P69030	NM_001850	COL8A1	-1.50230425730797	9.88658950368187	-5.00674017333277	0.000564258065801401	0.00492661169716223	-0.154895078851395
CCNC	277	144	0	A_23_P145397	NM_005190	CCNC	-1.50470159710779	9.9253974324558	-7.12704426922302	3.53107181638032e-05	0.00103381591193462	2.68575297611819
HIST1H4K	231	78	0	A_23_P30813	NM_003541	HIST1H4K	-1.50633802151495	8.62420796218337	-5.96764542184195	0.000149197553858011	0.00216056906913989	1.21271168888395
PTGFRN	233	154	0	A_33_P3307197	NM_020440	PTGFRN	-1.50634293150801	12.54987585476	-7.33300609852544	2.78064877813129e-05	0.000928313186270322	2.92842499318632
FAM18B2	341	104	0	A_24_P87490	NM_145301	FAM18B2	-1.50828291347642	10.0418056309964	-4.03425513533948	0.00247861692160006	0.0131333585550049	-1.67411984415505
SDCBP	41	65	0	A_23_P157580	NM_005625	SDCBP	-1.51018618571395	12.7776851459756	-3.07801224466659	0.0119391841821004	0.0398347424974184	-3.26727236463518
PCDHB16	181	121	0	A_23_P30200	NM_020957	PCDHB16	-1.51106704999084	10.723097025484	-6.40628955009346	8.47787041108954e-05	0.00160127940111497	1.79206850281101
SRSF9	93	137	0	A_24_P390070	NM_003769	SRSF9	-1.51242678728174	11.9157484299707	-6.99756513619376	4.11366111219633e-05	0.00110176013614274	2.53036816214751
SLC9A7P1	219	70	0	A_33_P3254380	NM_001257291	SLC9A7P1	-1.51520343936765	9.8881536133954	-7.38330079400672	2.62498373987509e-05	0.000905377340019343	2.9868577548441
ASAP1	185	152	0	A_33_P3775007	NM_001247996	ASAP1	-1.51651696729523	9.05763856209393	-5.87778909753273	0.000168042908827463	0.00232004730809036	1.09059929373036
STX17	325	80	0	A_33_P3269149	NM_017919	STX17	-1.51711395672991	7.35418955667979	-5.29216287328625	0.000374943216168146	0.00380400672237828	0.265601182477826
ARHGEF6	276	129	0	A_24_P228875	NM_004840	ARHGEF6	-1.52014955675759	8.09005992792586	-11.3162659137289	6.01341730851232e-07	0.000271179056885254	6.71305321021403
YIPF5	62	42	0	A_24_P328969	NM_030799	YIPF5	-1.52274999312359	10.5042767411927	-8.84401900631469	5.52813610262411e-06	0.000507263554504141	4.55217599283753
PDCD7	317	136	0	A_23_P129118	NM_005707	PDCD7	-1.52684677519633	9.97495137880925	-8.22899686497112	1.0378913638446e-05	0.000598546269218301	3.9229699404791
CXXC5	180	1	0	A_23_P399001	NM_016463	CXXC5	-1.52853165371032	12.7558573247278	-4.14577079022668	0.00207780299676333	0.0116663701122616	-1.49362765291917
SUDS3	29	13	0	A_23_P334990	NM_022491	SUDS3	-1.53501854082436	9.10646637637386	-6.15670371139716	0.000116576382911644	0.00187456174027517	1.4658046764776
PLSCR4	56	25	0	A_23_P91910	NM_020353	PLSCR4	-1.53875580560314	7.44396712536387	-5.39862801218164	0.000322883804457822	0.00347700148575492	0.41936238692342
RAB7B	199	107	0	A_23_P252541	NM_177403	RAB7B	-1.54444423543626	6.6932386710685	-10.4341448856729	1.26039593892244e-06	0.000313387103679238	6.00322947891538
SOX9	329	14	0	A_23_P26847	NM_000346	SOX9	-1.54523157865926	6.45306800471289	-8.1267651988103	1.15653001169864e-05	0.000627501005429331	3.81430926602301
KBTBD7	187	25	0	A_23_P25605	NM_032138	KBTBD7	-1.54613239986386	8.08425376610032	-8.08023980687472	1.21534313386503e-05	0.000636171317165948	3.76446056411331
GALNTL2	95	90	0	A_23_P212119	NM_054110	GALNTL2	-1.54636526125338	6.53993899104864	-4.99671938313224	0.000572535331097452	0.00496246934482438	-0.169876049438974
LAMP2	23	117	0	A_24_P396231	NM_002294	LAMP2	-1.54643274344642	11.5799960274096	-6.27081667988953	0.000100677075234885	0.00175070918198116	1.61607637214811
FKBP14	271	129	0	A_23_P215341	NM_017946	FKBP14	-1.54654250264391	10.0775252941276	-7.96113388772017	1.38127663572778e-05	0.000663044323644574	3.63570047047818
XLOC_009080	28	77	0	A_21_P0007430	ENST00000527059	XLOC_009080	-1.54744738796912	7.15401398867076	-7.08969448471101	3.68935418908573e-05	0.00105199769531653	2.64115654211462
NDRG3	97	150	0	A_24_P185604	NM_032013	NDRG3	-1.5510598914216	9.27457107843571	-8.84152787088748	5.54186727413132e-06	0.000507263554504141	4.54970945211758
ARL5A	100	65	0	A_24_P165595	NM_012097	ARL5A	-1.55267144124534	9.10102549117238	-6.84116719540475	4.96009371557331e-05	0.00120276857653182	2.33971241002688
DBF4	125	61	0	A_33_P3413523	NM_006716	DBF4	-1.55346016694438	7.27091758312305	-10.1205210265794	1.66103437000642e-06	0.000325543194940435	5.73543869203726
LMO7	67	39	0	A_33_P3280801	NM_005358	LMO7	-1.55497815952733	7.66844978764195	-6.65855281346036	6.19443345006014e-05	0.0013740754573176	2.11291895675783
C17orf61	183	22	0	A_23_P3994	NM_152766	C17orf61	-1.55547543007608	11.6981386678876	-5.90729289001037	0.00016158685001174	0.00226941231718902	1.13082425240277
EXOC1	34	123	0	A_23_P113972	NM_001024924	EXOC1	-1.55885849679875	8.42252486198255	-7.43818537480381	2.46583599265682e-05	0.000874208063440477	3.05025758608307
CNN2	31	149	0	A_24_P142743	ENST00000564572	CNN2	-1.558940225051	8.73922533466418	-3.98832294659403	0.00266667047263392	0.0138048674343097	-1.74887949089575
XPOT	326	80	0	A_23_P340722	NM_007235	XPOT	-1.56002072047632	11.0802275503053	-4.61218329857572	0.00101213637735095	0.00713221500013663	-0.755716166831844
ANKIB1	322	144	0	A_23_P355623	NM_019004	ANKIB1	-1.56134075897991	8.86858470949555	-5.93851760143907	0.000155044119648364	0.00221326477225543	1.17325688379875
C4orf43	195	44	0	A_23_P167269	NM_018352	C4orf43	-1.56217470755311	9.51621577303899	-7.61293114501679	2.02509187607225e-05	0.000805155264045049	3.24960336167101
DKFZP586B0319	364	6	0	A_33_P3464855	AL050097	DKFZP586B0319	-1.5640748102225	6.56776458803953	-3.88018726075921	0.00317106914963789	0.0156061568578486	-1.92579322421285
AKIRIN2-AS1	102	5	0	A_23_P19243	AF119870	AKIRIN2-AS1	-1.56458728597238	7.77745490299573	-3.52118977912904	0.00569354279458763	0.0235549446905098	-2.52113803932219
LOC153684	175	75	0	A_33_P3323760	NR_015447	LOC153684	-1.56483133816036	6.82670259930774	-4.97216053023629	0.000593374527605027	0.00509289881040832	-0.206653375150717
RAB11A	332	102	0	A_23_P77145	NM_004663	RAB11A	-1.56693731365309	9.50688379220852	-7.95576490062571	1.38931578744747e-05	0.000663169389773277	3.62985716890693
TEAD1	231	92	0	A_23_P362893	NM_021961	TEAD1	-1.56949891285822	11.2435312395238	-9.21037535050558	3.86117592530047e-06	0.000480024848802839	4.90796542906907
FBXO32	170	89	0	A_33_P3378126	NM_058229	FBXO32	-1.57145187075828	13.3409894110651	-2.98143189087779	0.0140573992835981	0.0449192471930805	-3.43041805425338
ZYG11B	281	35	0	A_23_P426140	NM_024646	ZYG11B	-1.57153892783218	8.12257262166013	-7.10378353810987	3.6287610262074e-05	0.00104310900663889	2.65800062086517
COL1A2	84	75	0	A_24_P277934	NM_000089	COL1A2	-1.57416968238735	14.5423491933341	-8.32999546988569	9.33584205540202e-06	0.000580320122391576	4.02915412390675
CCPG1	195	117	0	A_23_P346006	NM_020739	CCPG1	-1.5742938872334	9.19126458306598	-6.8937712543884	4.65602948542132e-05	0.00116114962870709	2.4042044104174
XLOC_011837	61	99	0	A_21_P0009119	lnc-SPIRE2-1:1	XLOC_011837	-1.57657684365719	6.60533517365042	-5.18048310146554	0.000439357840318008	0.00417766110836627	0.102502733180232
KIAA0528	204	139	0	A_23_P367628	NM_014802	KIAA0528	-1.57796164650391	9.44467945039054	-8.5273644239157	7.6120306040527e-06	0.000566110793896937	4.23337076824882
FAM72D	300	140	0	A_32_P151800	NM_207418	FAM72D	-1.58891230186862	8.32235362316747	-4.51890620288564	0.00116586199108796	0.00788234371328506	-0.90097444257025
SRRM1	55	128	0	A_24_P11131	NM_005839	SRRM1	-1.59146764830772	10.8934404735057	-4.48021723335868	0.00123673084352435	0.00821151818344842	-0.961573826257518
EBF1	74	25	0	A_33_P3241521	NM_001290360	EBF1	-1.5916418877164	8.33755189622322	-5.65544473488067	0.000226624381806038	0.00275615456982216	0.783346343279805
MRPL42P5	85	112	0	A_23_P398491	NM_001289132	MRPL42P5	-1.59168205652393	6.91948658547485	-9.33492645199239	3.4266778614019e-06	0.000449488397583419	5.02584886356743
USP13	246	162	0	A_23_P40989	NM_003940	USP13	-1.59785279983533	8.69088947236059	-6.27627283207305	9.99779807297988e-05	0.00174584190878168	1.62321478094
METTL7A	355	61	0	A_23_P415021	NM_014033	METTL7A	-1.60008890292926	8.37601162857071	-5.87277638027092	0.000169167145826385	0.00232713086896923	1.08375238020437
LOC100507153	239	13	0	A_21_P0014584	AK094623	LOC100507153	-1.60090849929851	8.76638019655666	-3.48420612450043	0.00605232356679755	0.0245431293580167	-2.58305270121325
DEPDC1B	365	15	0	A_23_P361419	NM_018369	DEPDC1B	-1.60160985200038	7.79699177787234	-4.94219784597867	0.000619901936840608	0.00524476707253819	-0.251642311004475
NFIX	10	40	0	A_33_P3884230	NM_002501	NFIX	-1.60990525888082	6.99348842424423	-8.49074522360801	7.90363731570231e-06	0.000571219561299982	4.19580569760465
HMCN1	320	106	0	A_23_P148990	NM_031935	HMCN1	-1.61099421266789	7.36792643318533	-9.18839042728378	3.94393955852194e-06	0.000483650130706519	4.88699793292924
FAM46A	44	137	0	A_33_P3410599	NM_017633	FAM46A	-1.61212661243718	10.1473553978853	-3.45950470982694	0.00630495091480068	0.0252365654851088	-2.62445440550902
ACSL4	160	71	0	A_23_P217564	NM_004458	ACSL4	-1.61275350107369	10.3932168650936	-7.34606143792388	2.7393011109952e-05	0.000924036901309225	2.94362368360932
PSMD11	82	21	0	A_23_P207600	NM_002815	PSMD11	-1.61501904826881	10.1875745593727	-8.88995607990351	5.28146781867059e-06	0.000499908934041099	4.5975434527683
TMEM14A	255	74	0	A_23_P42080	NM_014051	TMEM14A	-1.6161111115607	10.6884647392049	-7.4574121115764	2.41258872781008e-05	0.000866197828163336	3.07237756005165
SASH1	4	95	0	A_24_P658584	NM_015278	SASH1	-1.61681380819788	9.54816846913094	-5.18319021449034	0.000437663399019264	0.0041686875724768	0.106478066652583
VCAN	16	135	0	A_23_P144959	NM_004385	VCAN	-1.6210947238973	10.2988183453882	-4.42068839847497	0.00135483757438131	0.00875731414953085	-1.05520989431702
TAOK1	267	115	0	A_23_P38457	NM_020791	TAOK1	-1.62652627938148	10.1839568818008	-7.10956726850718	3.60420000621369e-05	0.00104207793665873	2.66490779495691
PRKAG2	51	142	0	A_23_P314760	NM_016203	PRKAG2	-1.62814859096535	10.7243698601995	-8.42578049890277	8.45137140924843e-06	0.000577013919289629	4.12880056314635
FOXN3	318	54	0	A_21_P0013848	NM_005197	FOXN3	-1.63304271262104	7.59056682488909	-9.54706395666667	2.8044943750013e-06	0.000402712235892773	5.22315052695043
C20orf94	160	33	0	A_23_P364766	NM_001009608	C20orf94	-1.63311056533496	6.79820991325268	-6.76707250288079	5.42544231058395e-05	0.00127104212876194	2.24823954885655
ALDH18A1	226	113	0	A_23_P1361	NM_002860	ALDH18A1	-1.63832745808732	11.5012294442002	-6.9037535621492	4.60064233470117e-05	0.00115424850382209	2.41640065377439
THOC1	263	19	0	A_23_P78372	NM_005131	THOC1	-1.64104112320625	7.13298632406937	-5.71786663853821	0.00020822989600823	0.00262795593757659	0.870341091881265
PAPSS1	230	132	0	A_23_P144465	NM_005443	PAPSS1	-1.6411999735212	9.62103108819583	-6.77933893612325	5.34524575227392e-05	0.00126101809206418	2.26343434714593
COPG2IT1	147	79	0	A_33_P3294459	AK123640	COPG2IT1	-1.64158278618421	6.40386877521096	-5.4272519296662	0.000310249704562799	0.00338692649299585	0.460415235955836
PDIA6	313	106	0	A_24_P319715	NM_005742	PDIA6	-1.64332310306203	12.6185808655393	-9.81473714632237	2.18927266046402e-06	0.000381905249015346	5.46601629561026
ETV1	31	75	0	A_33_P3357954	NM_004956	ETV1	-1.65118787271746	8.1377676260587	-5.96865219445327	0.000148999769112775	0.00216056906913989	1.21407319191644
XLOC_004165	184	23	0	A_21_P0003797	lnc-SCRG1-1:4	XLOC_004165	-1.65130466041363	8.10802653020501	-5.65158323771234	0.000227818286970714	0.00275615456982216	0.777945832034519
OLFML3	262	125	0	A_24_P11315	NM_020190	OLFML3	-1.65168961698001	6.85907823982055	-6.2899073792324	9.82538057124112e-05	0.00173207423213022	1.64103463620852
C2orf28	313	54	0	A_23_P28652	NM_016085	C2orf28	-1.6521405812398	11.4539920324174	-7.49984506196261	2.29943988149493e-05	0.000851679259154499	3.12103179318781
TSC22D2	317	2	0	A_23_P92230	NM_014779	TSC22D2	-1.65227326689445	7.78956747108342	-7.34414214447861	2.74533764313338e-05	0.000924036901309225	2.9413906520167
PALLD	118	111	0	A_23_P213102	NM_016081	PALLD	-1.65241857800684	10.9331817797453	-10.2484691525981	1.48286298269617e-06	0.000318741857874705	5.84571251795653
IFT20	318	126	0	A_23_P130089	NM_174887	IFT20	-1.65360843818843	10.4691073259338	-4.95443962164443	0.000608913835994577	0.00517281774290344	-0.23324547836415
OSTC	264	51	0	A_23_P411814	NM_021227	OSTC	-1.65449351430936	12.6304072977051	-7.43238679957613	2.48214427040846e-05	0.000874208063440477	3.04357731948645
SCPEP1	27	5	0	A_23_P152548	NM_021626	SCPEP1	-1.65464313551107	9.50390190546404	-6.79791093095912	5.22625712803987e-05	0.00125008938128824	2.28640116101778
PIK3R1	99	3	0	A_24_P29401	NM_181523	PIK3R1	-1.65588353647637	8.68144073602853	-5.58227182766188	0.000250438726222505	0.00293600192831859	0.680634928273267
FLJ41484	343	113	0	A_33_P3352522	AK092862	FLJ41484	-1.65845660615771	7.83692167450978	-8.62484415021079	6.89138294389797e-06	0.00055146019216221	4.33265697998481
CFI	285	56	0	A_23_P7212	NM_000204	CFI	-1.66253027364159	8.43299401228542	-11.793521881964	4.11338058425118e-07	0.000271179056885254	7.07229487431927
FAM55C	61	136	0	A_33_P3276207	NM_001134456	FAM55C	-1.66317695017586	7.9021774104674	-8.06149948372959	1.23994591246049e-05	0.000645508092364981	3.74431085422656
ERMP1	177	43	0	A_23_P169154	NM_024896	ERMP1	-1.66329527513418	8.97834381933632	-7.87923034824815	1.5096219604572e-05	0.000692804193918912	3.54619104588572
LOC284219	274	3	0	A_33_P3527721	AK094436	LOC284219	-1.66379823924037	8.28406869088753	-3.46060582639352	0.00629345994898036	0.0252207720207033	-2.62260803828326
PNOC	176	105	0	A_23_P253321	NM_006228	PNOC	-1.66628844123186	11.7621370101437	-4.06108909517277	0.00237525647523301	0.0127669430905978	-1.63055543780836
FUT8	151	36	0	A_23_P313632	NM_178155	FUT8	-1.66666946364424	10.8028057015367	-7.2178234185843	3.17623917527553e-05	0.000976254029906181	2.79338726023889
FGF7	125	142	0	A_33_P3257027	NM_002009	FGF7	-1.66703370589479	7.40050463607517	-5.79337052363448	0.00018809933336802	0.00247264926380903	0.974799710329728
SERTAD3	134	118	0	A_23_P141960	NM_203344	SERTAD3	-1.67193108257138	8.41570604023955	-7.07401430242207	3.75808325571058e-05	0.00105324602253134	2.62237958374903
PJA2	256	55	0	A_23_P133470	NM_014819	PJA2	-1.6739208356392	11.0338621918477	-4.88172524917467	0.000677374912388428	0.00552344036489418	-0.342839806297213
LOC643454	81	128	0	A_33_P3429575	BC157883	LOC643454	-1.67602558467268	12.067487324271	-10.5694004198697	1.12137581546847e-06	0.00029871511775573	6.11613873397621
METTL2B	35	119	0	A_23_P59836	NM_018396	METTL2B	-1.6767841512966	10.0959907709872	-7.27510969370681	2.97235527215269e-05	0.00094677756173598	2.86076127775567
ATP6AP2	16	33	0	A_23_P11353	NM_005765	ATP6AP2	-1.68126066697898	12.4604749716115	-8.90860588307761	5.18477234201099e-06	0.000496397255434259	4.61589933899256
SMC4	107	40	0	A_33_P3248519	NM_005496	SMC4	-1.682030044542	10.6128761515378	-7.7801779930895	1.6824428586228e-05	0.000737574094257823	3.43687349988736
UST	209	93	0	A_23_P314145	NM_005715	UST	-1.68212955843462	8.96603290170727	-4.82750310850684	0.000733752677802304	0.00577715689403245	-0.425061522324317
C4orf33	191	2	0	A_23_P433152	NM_173487	C4orf33	-1.68275642541394	8.12129018543514	-7.53637497749517	2.20664210747648e-05	0.000847841933454762	3.16273742529248
SNX16	241	112	0	A_24_P320880	NM_022133	SNX16	-1.68441659026804	7.40853171916341	-4.60778625870858	0.00101887683723423	0.00716180136349582	-0.762536543384573
ERP44	241	135	0	A_23_P373927	ENST00000262455	ERP44	-1.68484508343427	7.5298800625137	-8.53785161841618	7.53069378162194e-06	0.000565107332018198	4.24410185535812
ARID4A	283	145	0	A_23_P117515	NM_002892	ARID4A	-1.69176314233871	6.53389025866381	-5.30945837752409	0.000365907745921824	0.00374893641000124	0.290694456460944
SCD	224	97	0	A_32_P163858	NM_005063	SCD	-1.69389671733346	10.8281021170652	-6.53040984909392	7.25763609535927e-05	0.00149265382361222	1.95104266790345
PPIC	246	154	0	A_23_P422724	NM_000943	PPIC	-1.69553074372117	11.665128244085	-8.64751251276317	6.73467976686297e-06	0.000547283074322781	4.35559824933793
KRAS	145	142	0	A_23_P306507	NM_033360	KRAS	-1.6966731221815	8.29277937821884	-10.5818083779713	1.10948835987809e-06	0.00029871511775573	6.12642043863613
CYBASC3	191	71	0	A_23_P342131	NM_153611	CYBASC3	-1.70422951370223	11.8227911957914	-4.48907006707369	0.00122012083706951	0.00814669059107854	-0.947689503414228
TAF3	33	76	0	A_32_P153892	NM_031923	TAF3	-1.70428743901906	7.55610234107933	-5.44482054258354	0.000302758676414928	0.00332361293725479	0.485552170346332
SRGN	263	14	0	A_23_P86653	NM_002727	SRGN	-1.70562694614987	11.2301536708278	-5.93938367352358	0.000154866763435275	0.00221262899834326	1.17443179812967
GOLIM4	233	161	0	A_24_P191664	NM_014498	GOLIM4	-1.70755076040698	7.53076084747003	-7.83003634388769	1.59290763764031e-05	0.000715262758367924	3.49204568009019
LIFR	148	91	0	A_24_P397386	NM_002310	LIFR	-1.70869855260224	7.82177270110672	-4.65694376189111	0.000946156155080865	0.00687397094962587	-0.686440493247771
LOC100288615	262	139	0	A_33_P3317553	NR_036650	LOC100288615	-1.70922540744533	9.55689021309454	-8.19587649797134	1.07480807160842e-05	0.000602869618347634	3.88789753413302
GALNT5	139	43	0	A_24_P408736	NM_014568	GALNT5	-1.70977119950516	9.07812418290938	-5.71164728325972	0.000209988483571556	0.00264214361617715	0.861699243920572
SEMA3C	147	92	0	A_23_P256473	NM_006379	SEMA3C	-1.71112185027162	9.09567531117774	-5.89219478511571	0.000164856598373838	0.00229053050234342	1.1102556692293
DLX3	261	109	0	A_24_P296587	NM_005220	DLX3	-1.71326235298419	7.0110706797712	-2.95349553031507	0.0147388039823953	0.0465202227250329	-3.47758708853555
SREK1	213	136	0	A_24_P191833	NM_139168	SREK1	-1.72311430821965	8.89265446036053	-6.89741717889914	4.63571665338195e-05	0.00115781714735667	2.40866049801923
RBFOX2	13	157	0	A_23_P103099	NM_001031695	RBFOX2	-1.72894436140628	7.78243717666753	-7.85808911058785	1.54481903963457e-05	0.000703145912056619	3.52295732842557
DNAJB4	98	21	0	A_24_P393958	NM_007034	DNAJB4	-1.73040036375444	7.96308008528939	-8.45644516018667	8.18784398093307e-06	0.000571219561299982	4.1604862780781
XLOC_010377	241	28	0	A_21_P0007936	lnc-GTF2F2-2:14	XLOC_010377	-1.73328999017466	7.94206669357573	-4.65480864999353	0.000949197295070779	0.00689005565951377	-0.689738630428337
KIAA1109	143	143	0	A_24_P325176	NM_015312	KIAA1109	-1.73763827149085	9.17754984013291	-5.90586216395115	0.000161893680949989	0.00226982430678327	1.12887656282969
XLOC_l2_007427	347	132	0	A_21_P0011818	TCONS_l2_00013792	XLOC_l2_007427	-1.73870981382096	6.97309515620297	-5.29645442426461	0.000372679152781628	0.00379258522064089	0.27183174043778
LTN1	373	76	0	A_32_P115505	NM_015565	LTN1	-1.74773145143999	7.58892096689382	-5.5929920087843	0.000246787781723802	0.00291417222057536	0.695732194576245
SERPINH1	327	33	0	A_33_P3269203	NM_001207014	SERPINH1	-1.74912819292268	14.2804104715339	-7.23108037526265	3.12774283439947e-05	0.000966777574741221	2.80901628488312
LYPD1	119	99	0	A_32_P101031	NM_144586	LYPD1	-1.76114100004896	8.86509206746588	-4.16674108432846	0.00201038683965975	0.0114190791452866	-1.45985152883387
BLID	126	91	0	A_24_P50368	NM_001001786	BLID	-1.76317604729233	7.08645628943688	-4.13822340857077	0.00210264646517355	0.0117228873705911	-1.50579696010516
PDIA4	384	37	0	A_23_P42802	NM_004911	PDIA4	-1.76358169837959	11.7923671068502	-7.69815835342867	1.84186702007113e-05	0.000763275191227982	3.34545983409537
LOC100506528	51	100	0	A_21_P0014604	lnc-ADAM30-1:1	LOC100506528	-1.76555991571487	7.84126521632029	-3.78150886028185	0.00371892159312989	0.0174026727022334	-2.08828666134618
SRSF11	48	133	0	A_23_P11664	NM_004768	SRSF11	-1.76703557238683	9.73397043996876	-4.98546310010675	0.000581988043570757	0.00501829131358449	-0.186721590936612
CD9	110	111	0	A_23_P76364	NM_001769	CD9	-1.77038620003812	11.3723101147456	-7.50925443039766	2.27513844568663e-05	0.000848316048913663	3.13179022015154
TOP2A	6	58	0	A_23_P118834	NM_001067	TOP2A	-1.77278167387954	10.2662402507808	-6.01004422307463	0.000141107816841702	0.00209138355940028	1.26992174937687
ABI2	342	72	0	A_24_P933418	NM_005759	ABI2	-1.77782245221754	9.98524287681488	-8.99381915265397	4.76686674243086e-06	0.000496112025389884	4.69931235804809
PHACTR2	29	53	0	A_23_P111240	NM_014721	PHACTR2	-1.78026059390716	7.8663886587272	-6.37128727417444	8.86082209264626e-05	0.00163808989900856	1.7468461391126
SCP2	85	82	0	A_23_P126057	NM_002979	SCP2	-1.78235388795348	8.79055174672928	-9.55147812336819	2.79293489295341e-06	0.000402712235892773	5.22721013898002
ARMC1	194	115	0	A_32_P234827	NM_018120	ARMC1	-1.78363075820223	10.329438825527	-11.6579473404221	4.57556957077039e-07	0.000271179056885254	6.97192263495674
ARL6IP1	65	97	0	A_23_P118150	NM_015161	ARL6IP1	-1.78404959315423	10.2766356564535	-5.85223587794354	0.000173859223920194	0.00236048965875021	1.05565748328388
SGOL2	266	18	0	A_23_P411335	NM_152524	SGOL2	-1.78413182420691	8.48278656751858	-6.97670981491791	4.21688007649656e-05	0.00111329643731151	2.50513324090714
EDEM1	256	148	0	A_24_P285768	NM_014674	EDEM1	-1.78666158875134	8.10732624641363	-7.21278652818813	3.19487840653018e-05	0.000979550683001782	2.7874431677972
CDKL5	31	128	0	A_24_P282343	NM_003159	CDKL5	-1.78698711744565	7.64778926788	-9.1261780757083	4.18881755768647e-06	0.000491402456186206	4.82740285791094
TAF2	191	86	0	A_23_P43248	NM_003184	TAF2	-1.78951282445275	9.47876163659329	-6.27152657640019	0.000100585818503253	0.00175070918198116	1.61700538604772
TTBK2	56	123	0	A_33_P3215277	NM_173500	TTBK2	-1.79401190455825	9.6528159128692	-4.58089332700672	0.00106115421596536	0.00736573670156955	-0.804309404779036
CDC20	302	98	0	A_23_P149200	NM_001255	CDC20	-1.79434006289174	9.40769651215897	-7.70779588544623	1.82230970512379e-05	0.000763275191227982	3.35624349129932
TRPM7	246	122	0	A_23_P88470	NM_017672	TRPM7	-1.79497007635192	7.49953424396846	-7.94014847423053	1.41298951744106e-05	0.000667172623585799	3.61284182909563
SGPP1	153	18	0	A_23_P347048	NM_030791	SGPP1	-1.80625126126102	7.85014252155625	-10.2412897466633	1.4922868208925e-06	0.000318741857874705	5.8395625478047
NEK2	302	3	0	A_23_P35219	NM_002497	NEK2	-1.80925038618141	7.24085105393289	-5.32541533613889	0.000357778304858092	0.00368597945617252	0.313806340328781
HIST1H1D	172	157	0	A_24_P260639	NM_005320	HIST1H1D	-1.81040387275648	8.80599270083918	-8.00307247319612	1.32019496083818e-05	0.000658476881814467	3.68122749643817
TCF4	290	51	0	A_23_P27332	NM_003199	TCF4	-1.81086645358807	11.3853642134607	-7.86331370282695	1.53603858901335e-05	0.000701064845325298	3.52870398466641
TRIM2	161	52	0	A_24_P208909	NM_015271	TRIM2	-1.81305607095259	9.74922792924828	-10.0455016861105	1.77629731220025e-06	0.000344085313069117	5.67011438477132
AK4	4	69	0	A_21_P0013984	NM_001005353	AK4	-1.81720649803262	10.4570429946616	-10.776097297429	9.4025841753798e-07	0.000279710088888664	6.28576906391319
TPR	269	129	0	A_24_P179611	NM_003292	TPR	-1.8209432227053	9.25919694588398	-8.95757956883683	4.93992463980382e-06	0.000496112025389884	4.66392980938346
ID2	210	11	0	A_23_P143143	NM_002166	ID2	-1.82985584152302	10.6622480055162	-4.69221972456011	0.000897382998436988	0.00661482450042557	-0.632042039863446
NMB	310	53	0	A_23_P88522	NM_021077	NMB	-1.830975576144	15.4544776067478	-3.36387149737624	0.00739067355616969	0.0281098700393221	-2.78507469228748
LOC728061	368	108	0	A_33_P3214129	AK025151	LOC728061	-1.83121300329723	9.84129321141734	-4.25438987706867	0.00175262006418948	0.0103755855185972	-1.31926356742413
TMPRSS15	57	151	0	A_23_P102864	NM_002772	TMPRSS15	-1.83741464181769	9.95539873759663	-6.72983960101403	5.67695124840209e-05	0.00130444594271904	2.20199264895358
NPTN	243	53	0	A_23_P37598	NM_012428	NPTN	-1.84019766194598	9.34925078639952	-5.99317533557496	0.000144268325146333	0.00211192093902704	1.24719134240335
TMEM47	108	156	0	A_24_P143171	NM_031442	TMEM47	-1.84052264003131	8.9184720530368	-6.59755588440189	6.67784858463213e-05	0.00143122319977286	2.03614807248117
LOC100652766	5	152	0	A_21_P0014003	ENST00000521821	LOC100652766	-1.84519450103606	8.01600416239005	-6.69131696180482	5.95051775023211e-05	0.00134522263086322	2.15394461060928
LYRM7	99	105	0	A_32_P18159	NM_181705	LYRM7	-1.85878541483993	7.47626853570731	-8.26374388659273	1.00064006301738e-05	0.000595670640193332	3.9596309443955
WDFY1	50	70	0	A_23_P502797	NM_020830	WDFY1	-1.86058034154136	10.2150528439045	-3.20188111951359	0.00969125038968869	0.0341758129216393	-3.05807401369023
RAD51AP1	84	31	0	A_23_P99292	NM_006479	RAD51AP1	-1.86318840284375	8.4331420852087	-4.76857130470675	0.000800745458983537	0.0061614866518276	-0.514904735369567
MTMR12	160	66	0	A_24_P354615	NM_001040446	MTMR12	-1.86542207239205	8.80408197502839	-5.14909285644668	0.000459526585237846	0.00431281880759284	0.0563277865568264
GNA11	100	137	0	A_23_P142289	NM_002067	GNA11	-1.86672687290256	8.4991268788946	-11.9747561860177	3.5735752388418e-07	0.000271179056885254	7.2044494591572
LOC100129034	302	141	0	A_32_P91042	NR_027406	LOC100129034	-1.87064444975962	7.38068648240295	-11.2580857215087	6.30434170639178e-07	0.000271179056885254	6.66811162252384
ANK1	304	89	0	A_23_P216108	NM_000037	ANK1	-1.871650621968	7.94136059862003	-9.32041734868318	3.47443204401054e-06	0.000452191901727904	5.01219506252631
SCARNA9	210	31	0	A_33_P3290443	NR_002569	SCARNA9	-1.87593977226442	11.1913373750487	-4.56148499521157	0.0010928210508381	0.00752596357416778	-0.834518628312775
GUCY1B3	27	141	0	A_23_P121564	NM_000857	GUCY1B3	-1.8819793822317	7.5890152364636	-4.96226351399561	0.000602000227347799	0.00512453847081604	-0.221499247675861
CAT	61	51	0	A_23_P105138	NM_001752	CAT	-1.88815319792845	10.9823533546856	-7.46496665523548	2.39200974444251e-05	0.000864392415025331	3.08105620879567
SERPINE2	24	156	0	A_23_P50919	NM_006216	SERPINE2	-1.89787318952541	11.1316500834574	-7.06056772186571	3.81812848330838e-05	0.00106010337339057	2.60625162430702
XLOC_l2_013189	296	97	0	A_21_P0013113	TCONS_l2_00025009	XLOC_l2_013189	-1.89852886562093	8.67900617588137	-10.5608354085384	1.12966279000006e-06	0.00029871511775573	6.10903400517299
ANLN	116	72	0	A_23_P356684	NM_018685	ANLN	-1.89932724211757	9.77592991092458	-5.19212387428372	0.000432121073073727	0.00413623651306384	0.119589252623832
DLEU2L	323	10	0	A_33_P3286218	NR_002771	DLEU2L	-1.89995881926787	8.24999752799956	-5.72072218364355	0.000207427773152599	0.00262359097263462	0.874306985126433
RAB26	163	108	0	A_33_P3209229	NM_014353	RAB26	-1.9026069897203	8.47722277359007	-9.15306413287691	4.08101141443892e-06	0.000491402456186206	4.85320541311216
TXNIP	372	25	0	A_23_P97700	NM_006472	TXNIP	-1.90396109172341	14.3970711416064	-5.64589275044499	0.000229590023714437	0.00277047216332275	0.769983361495627
CSNK1A1	268	135	0	A_24_P183292	ENST00000412431	CSNK1A1	-1.90705093541359	8.24490163125688	-5.99654908318259	0.000143630176724728	0.00210786383051024	1.25174069297185
BTAF1	333	86	0	A_23_P408675	NM_003972	BTAF1	-1.91149607962914	9.60318404211823	-8.71634500283855	6.28217857324597e-06	0.000533953126794412	4.42492195058041
ACTR2	191	48	0	A_23_P377376	NM_001005386	ACTR2	-1.91558949543614	9.87746116356441	-8.46787630300582	8.09190857436369e-06	0.000571219561299982	4.17227151375204
OSBPL8	191	94	0	A_24_P153511	NM_020841	OSBPL8	-1.91690732260351	7.15597407338476	-6.03959008724076	0.000135750595454553	0.00204155657416897	1.30963447737634
CNPY4	49	74	0	A_23_P157038	NM_152755	CNPY4	-1.93401326425916	8.34081042725556	-6.4251466123523	8.27900524443757e-05	0.00158154288072969	1.8163599527494
TNRC6A	213	73	0	A_23_P349310	NM_014494	TNRC6A	-1.93513319603519	10.1206865887307	-8.96295797348979	4.91381317054223e-06	0.000496112025389884	4.66918954848665
ODF2L	283	85	0	A_33_P3244998	NM_001007022	ODF2L	-1.94101309610301	13.4691590504937	-8.38555389501435	8.81117973459809e-06	0.00057790428541351	4.08707668745138
SNORA16B	204	77	0	A_21_P0000494	NR_004389	SNORA16B	-1.95132231829279	7.79080308300227	-5.71312976748757	0.00020956785047435	0.00263884415801375	0.863759686591658
CCNY	222	145	0	A_23_P300905	NM_145012	CCNY	-1.95411706892958	9.01494855051865	-8.4569983670574	8.1831727883372e-06	0.000571219561299982	4.16105695253791
CDH18	358	123	0	A_23_P84118	NM_004934	CDH18	-1.95599050721475	7.55083677907385	-5.86944411250072	0.000169918977162062	0.00233361932443759	1.07919877068979
LOC100130894	261	78	0	A_33_P3355921	NR_034083	LOC100130894	-1.95901701673844	7.7976933199688	-3.04245413588053	0.0126783353056595	0.0416018945077564	-3.32734512831951
OSTCP2	176	55	0	A_21_P0013921	ENST00000437956	OSTCP2	-1.9684240480019	11.4102319589587	-7.27995192835077	2.95578430224817e-05	0.00094677756173598	2.86643685512431
SHOC2	176	73	0	A_23_P202565	NM_007373	SHOC2	-1.97011249771794	9.72901905048269	-6.85924631632594	4.85323288006983e-05	0.00118548396699536	2.36191920043182
ACTB	50	86	0	A_23_P135769	NM_001101	ACTB	-1.97448837994724	14.513008449658	-7.5984614408322	2.05812182776911e-05	0.000810549681532047	3.2332405301508
CLEC3B	25	147	0	A_23_P69497	NM_003278	CLEC3B	-1.97557487622445	7.6726717106944	-9.5430545604567	2.81503916928209e-06	0.000402712235892773	5.21946156873271
FAM198B	248	16	0	A_33_P3321432	NM_016613	FAM198B	-1.98487061478148	9.25336009693775	-14.5338357039209	5.86996666472877e-08	0.000162979624446194	8.85079288804234
DDR2	10	42	0	A_23_P452	NM_001014796	DDR2	-1.98714359121189	8.76337973581207	-5.34262692098268	0.000349226215884809	0.00364293020064185	0.338693060133576
RRAGC	307	160	0	A_23_P97623	NM_022157	RRAGC	-1.98769626434292	10.2418173426252	-7.66238471806705	1.91648199314105e-05	0.000779434155832742	3.30533288063344
SATB1	68	159	0	A_23_P259741	NM_002971	SATB1	-1.99852034535327	8.20447774148355	-9.0562840577533	4.48389480874502e-06	0.000496112025389884	4.75998453889902
XLOC_l2_009136	185	100	0	A_21_P0012220	ENST00000429521	XLOC_l2_009136	-2.00400988471421	7.42413821490777	-7.96915053431875	1.36936710913506e-05	0.000663044323644574	3.64441902133243
LARS	162	146	0	A_33_P3531828	NM_020117	LARS	-2.00922111271625	8.88064115871873	-8.49019625166154	7.90810047238963e-06	0.000571219561299982	4.19524142858571
GPAM	243	142	0	A_24_P227069	NM_020918	GPAM	-2.01788841742801	10.1349873672869	-5.19152299655136	0.000432491483192109	0.00413623651306384	0.118707764825158
CMTM6	235	146	0	A_24_P97526	NM_017801	CMTM6	-2.02706471158086	9.95464289240006	-7.67621710335723	1.88724848245829e-05	0.000776288209117843	3.3208670599584
OLFML2B	280	88	0	A_23_P137689	NM_015441	OLFML2B	-2.02849978055083	8.37965291863561	-5.47597690155147	0.000289947106071801	0.00322870845604386	0.530017608616974
XLOC_l2_015885	274	145	0	A_21_P0013877	TCONS_l2_00030893	XLOC_l2_015885	-2.03146962017575	13.8110415548333	-3.17028134673754	0.0102198921897814	0.0355063991636223	-3.11142073098009
LOC100506303	370	95	0	A_21_P0014553	ENST00000620237	LOC100506303	-2.04468463535023	7.51936855886982	-5.49030794552609	0.000284250650770374	0.00319307592122971	0.55042208310326
C18orf54	352	58	0	A_32_P162374	NM_173529	C18orf54	-2.05303721244957	8.18875073840879	-4.25980111363677	0.00173789553531039	0.0103177482974824	-1.31061541310116
SLC39A10	18	4	0	A_23_P119778	NM_020342	SLC39A10	-2.05582317448268	7.88562575703953	-5.21193806319046	0.000420094908309448	0.00407592374928777	0.148626752089752
ENC1	47	113	0	A_24_P69095	NM_003633	ENC1	-2.06170616797037	7.75669511377385	-5.59760616075324	0.000245233993924136	0.00289946991113001	0.702225080496252
SPOP	329	80	0	A_24_P270890	NM_001007226	SPOP	-2.06948542613639	9.76048167057699	-9.11370546200246	4.23988145684581e-06	0.000491402456186206	4.81540820391287
RBM47	261	54	0	A_23_P132910	NM_019027	RBM47	-2.07927381775747	8.30899293278563	-10.7821036961183	9.35498204733376e-07	0.000279710088888664	6.29064642748594
SNORD26	374	94	0	A_21_P0000258	NR_002564	SNORD26	-2.087507729222	7.74671304575823	-5.35821628094618	0.000341669156700451	0.00358655732922042	0.361196217924127
CALCA	166	108	0	A_24_P198178	NM_001033953	CALCA	-2.093171696457	7.59507224877626	-3.36135600649463	0.00742171201763245	0.0281893069999405	-2.78930600167385
ITGB1	20	41	0	A_23_P104199	NM_133376	ITGB1	-2.10664707913218	10.9030733781644	-6.60541379685991	6.61334335520595e-05	0.00142340680819607	2.04606687556404
PTP4A2	314	85	0	A_23_P23114	NM_080391	PTP4A2	-2.10973638856378	10.3691542280069	-10.521056343745	1.16903866214855e-06	0.000304297110511449	6.07595721254475
ADCY8	66	90	0	A_23_P169993	NM_001115	ADCY8	-2.11791461472361	9.0059990208483	-4.54109041596734	0.00112718094154258	0.00769069218068444	-0.866318892001563
KIF20A	15	1	0	A_23_P256956	NM_005733	KIF20A	-2.12558822328768	9.4515894147266	-5.39483528440962	0.000324598829323666	0.0034887078977718	0.413913674906581
ALCAM	205	58	0	A_33_P3713357	NM_001627	ALCAM	-2.12923898770828	11.2081089590523	-10.7424869304045	9.67389329948336e-07	0.000282732260484374	6.25842280841467
UBXN4	51	28	0	A_32_P95823	NM_014607	UBXN4	-2.13196099261758	8.84649782216865	-7.18487644829347	3.30033526191291e-05	0.000995380851220162	2.75444666403436
SLC30A4	311	154	0	A_32_P21255	NM_013309	SLC30A4	-2.13265842821437	7.15211262779846	-12.7904839336628	1.94033561027927e-07	0.000271179056885254	7.77196511702221
CASC5	129	100	0	A_23_P100127	NM_170589	CASC5	-2.13367973524949	8.22620833201733	-5.89692510000364	0.000163824568422428	0.00228925146629477	1.11670349990786
UGT1A6	55	16	0	A_24_P222872	NM_001072	UGT1A6	-2.14163720734911	10.7973914771967	-7.43365325320823	2.47857244451653e-05	0.000874208063440477	3.04503670250695
MBOAT2	224	74	0	A_24_P114255	NM_138799	MBOAT2	-2.14311228143792	9.19217736672091	-8.26318610446271	1.0012264175019e-05	0.000595670640193332	3.95904351757495
COL5A2	364	57	0	A_23_P33196	NM_000393	COL5A2	-2.14346194215394	12.8781971205507	-8.98834355324294	4.79258518651679e-06	0.000496112025389884	4.69397489783013
IGFBP4	280	48	0	A_24_P382187	NM_001552	IGFBP4	-2.16749292857994	7.61144806087843	-9.85201630242057	2.11599279200097e-06	0.00037500344597813	5.49931412025521
LUM	71	95	0	A_23_P99063	NM_002345	LUM	-2.18275723480801	10.9493598460879	-10.2780574408452	1.44470575743122e-06	0.000318741857874705	5.87101125354026
TMEM119	257	44	0	A_33_P3395605	NM_181724	TMEM119	-2.19555957422173	9.05530933692024	-3.84450286791373	0.00335872184625265	0.0161900888995147	-1.9844429645557
RARRES2	253	86	0	A_23_P134237	NM_002889	RARRES2	-2.19811806038691	8.50413507493029	-6.76045537324745	5.46924458561004e-05	0.00127429574198151	2.24003421998133
CALU	16	103	0	A_23_P122815	NM_001219	CALU	-2.2313373916487	14.7502847173982	-10.9676909830037	8.00662686464145e-07	0.000271179056885254	6.43992867112303
PXK	155	144	0	A_24_P140204	NM_017771	PXK	-2.23848880722087	9.81329089371452	-9.13231017051955	4.16395866697081e-06	0.000491402456186206	4.83329422447014
RNASE4	178	94	0	A_23_P205531	NM_001282192	RNASE4	-2.23856268727991	9.30910769823226	-6.76486377905815	5.44002063633627e-05	0.00127104212876194	2.24550136397978
GXYLT2	189	59	0	A_24_P118196	NM_001080393	GXYLT2	-2.24496869462759	10.5151973401226	-7.80944368985799	1.62924358982127e-05	0.000725710400075735	3.46929447242242
LOC100133299	223	72	0	A_33_P3376454	AY358688	LOC100133299	-2.2836598395592	8.30554468672992	-4.31406344265277	0.00159726859412064	0.00975757151061819	-1.22410009034135
UGGT1	283	54	0	A_33_P3366246	NM_020120	UGGT1	-2.2954763726603	8.33864607402544	-11.2490795919275	6.35073764037813e-07	0.000271179056885254	6.66113196413168
PGM5P2	246	152	0	A_33_P3404097	NR_002836	PGM5P2	-2.30194664408693	11.6320993586036	-8.23876212849618	1.02727204755302e-05	0.000597085755142083	3.93328693588202
SNAI2	165	75	0	A_23_P169039	NM_003068	SNAI2	-2.30622742270574	11.6968155192893	-5.03909820161591	0.000538391502302328	0.00478350081965572	-0.106620645282632
HIST1H4C	33	65	0	A_23_P214487	NM_003542	HIST1H4C	-2.32738046818002	12.7651515786557	-3.4649584369626	0.00624824930419977	0.0251060263286695	-2.61531024366135
UGT1A8	213	47	0	A_33_P3302075	NM_019076	UGT1A8	-2.33532451916735	9.80494160280677	-7.70067309329724	1.83674198712371e-05	0.000763275191227982	3.34827472449246
RBMX2	17	88	0	A_23_P255153	NM_016024	RBMX2	-2.39586712074375	9.38113518986606	-7.02446500337475	3.98455111240342e-05	0.00108577471066351	2.56283185516616
MAN2A1	306	138	0	A_23_P360769	NM_002372	MAN2A1	-2.40624115303146	8.79664382958077	-6.07691741847867	0.000129293851257318	0.00199067122744516	1.35962536713896
TCF12	153	48	0	A_24_P82142	NM_207038	TCF12	-2.41667793175542	9.46253150282578	-6.36771775965862	8.90091319738553e-05	0.00164026894861997	1.7422246671484
ACBD3	121	141	0	A_24_P171182	NM_022735	ACBD3	-2.41800940970201	8.05919095490757	-5.63805548207836	0.000232054451454125	0.00278713708413042	0.759009147017538
SNORA16A	132	95	0	A_21_P0000369	NR_003035	SNORA16A	-2.45702929699394	11.2372154957908	-6.4204306825983	8.32826178632559e-05	0.0015819898870969	1.81028963860701
RAP2A	330	30	0	A_24_P81965	NM_021033	RAP2A	-2.46295274765162	8.61902595704681	-10.9992319082843	7.79937964531871e-07	0.000271179056885254	6.46502869338146
PRKDC	68	26	0	A_23_P9603	NM_006904	PRKDC	-2.49268319719618	8.91084374634129	-6.07313354481244	0.000129933032950412	0.00199131039183157	1.35456697516295
HMGB1	324	20	0	A_24_P169148	NM_002128	HMGB1	-2.5491356149073	11.2852397128769	-8.156670368874	1.1203664541791e-05	0.000618019362919525	3.84621887431133
PDK4	243	87	0	A_24_P243749	NM_002612	PDK4	-2.5984265177114	8.71484773337072	-11.0389495026149	7.54671511875103e-07	0.000271179056885254	6.49652499428401
ANGPT1	99	53	0	A_23_P216023	NM_001146	ANGPT1	-2.60094916516641	9.00380282463423	-8.76715387873364	5.96944719260264e-06	0.000528962876497699	4.47576978376285
PRO2852	229	92	0	A_33_P3538279	XR_158845	PRO2852	-2.64368981310121	7.39318552129272	-4.72128012635964	0.000859213280370521	0.0064604483350922	-0.587360478968361
PRRT2	266	25	0	A_23_P66017	NM_145239	PRRT2	-2.7205233485126	9.72366117596055	-4.63075450617942	0.000984185971363492	0.00702165057684985	-0.726939551099341
CYP1B1	72	18	0	A_23_P209625	NM_000104	CYP1B1	-2.79438464680639	13.0731253808049	-13.7534568665622	9.85473828080585e-08	0.000234528692885635	8.38886498183394
RNU4ATAC	192	2	0	A_21_P0000503	NR_023343	RNU4ATAC	-2.82257758486805	12.6199583157451	-4.14893445269273	0.00206748149727212	0.0116319399740143	-1.48852864314297
SOST	21	122	0	A_23_P118571	NM_025237	SOST	-2.83891192294109	9.12507811551172	-4.00467669528274	0.00259805189798088	0.0135507033714663	-1.72223483255162
PTN	136	56	0	A_24_P870620	NM_002825	PTN	-2.90445462533999	10.7802331269542	-16.7113842747156	1.56728761420417e-08	0.000130547221825137	9.98491469282209
SNAR-D	236	12	0	A_21_P0000508	NR_024243	SNAR-D	-2.92132678552537	14.1401812717481	-2.9808398298068	0.0140715028231048	0.0449505590661752	-3.43141787052277
SNAR-B2	370	4	0	A_21_P0000507	NR_024230	SNAR-B2	-2.95718683298286	14.6973875721886	-3.2695704434571	0.00865132948183172	0.0315090412083147	-2.9438857354805
EDIL3	349	4	0	A_23_P401606	NM_005711	EDIL3	-3.00988580671824	8.89189038691234	-15.2356987289391	3.76314413901341e-08	0.000131485402984944	9.23985140718229
SNAR-A3	298	4	0	A_33_P3587376	NR_024214	SNAR-A3	-3.04764357990341	15.2585708761542	-3.50577091311725	0.00584036170122382	0.0239288208511283	-2.54693992673461
XLOC_l2_001853	65	111	0	A_21_P0010857	ENST00000440192	XLOC_l2_001853	-3.6105477551233	11.6159803190253	-6.6323008371594	6.39767878330975e-05	0.0014023543533047	2.0799410427591
Up-regulated genes
A4GALT	356	126	0	A_33_P3294002	NM_017436	A4GALT	1.00042305364586	9.53397417195653	4.66237690882276	0.000938464102592281	0.00683298666306154	-0.678050722377256
DMWD	325	134	0	A_33_P3428642	NM_004943	DMWD	1.00120125345231	7.97220356658929	6.69308885360029	5.93762642752072e-05	0.00134522263086322	2.1561590891578
C11orf84	15	123	0	A_23_P313223	NM_138471	C11orf84	1.00122589671271	8.15121678126727	6.8032253760003	5.19273826908843e-05	0.00125008420266971	2.29296459493713
XLOC_003714	136	77	0	A_21_P0003658	lnc-USP38-1:1	XLOC_003714	1.00216042309735	6.94051151408613	6.36845042169408	8.89266832464996e-05	0.00164026894861997	1.7431733959698
XLOC_011568	188	22	0	A_19_P00315869	lnc-DET1-1:2	XLOC_011568	1.00221899705838	7.54414996362071	4.09264285537569	0.00225949148888021	0.0123331810987075	-1.57943509721012
LOC100505519	87	145	0	A_19_P00321110	ENST00000449545	LOC100505519	1.00228650484994	7.69298978897013	4.86685555445017	0.00069236079548081	0.00558821033053361	-0.365345741243307
TIMM50	87	3	0	A_23_P415882	NM_001001563	TIMM50	1.00326443837569	11.333869798946	6.49379991028847	7.59650486230121e-05	0.00151526472396124	1.90437657508923
SDR39U1	3	145	0	A_23_P163161	NM_020195	SDR39U1	1.00332585629992	10.178374418946	4.61600625839176	0.00100631446369974	0.0071158254960828	-0.749788450421472
OR5V1	214	52	0	A_23_P42241	NM_030876	OR5V1	1.00426304084408	6.54276047684023	7.24213509944615	3.08791683612596e-05	0.000962637583301879	2.82203169431438
TNK1	203	21	0	A_33_P3388618	NM_001251902	TNK1	1.00538500182853	6.22396805245666	6.62905768990998	6.42328418596093e-05	0.00140500909705735	2.07586039051675
SPIRE2	267	85	0	A_33_P3210203	NM_032451	SPIRE2	1.00544044255584	8.86812960412036	4.80621454727952	0.000757237061021128	0.00591411729936754	-0.457459053448297
TLCD1	335	70	0	A_23_P420417	NM_138463	TLCD1	1.00553032350236	8.66068432200809	6.5822253490824	6.80566428540792e-05	0.00144243716705611	2.01677221157824
KRTAP9-6	8	71	0	A_33_P3358908	NM_001277331	KRTAP9-6	1.00607465219299	8.42085938601228	6.40922793706209	8.44654579879e-05	0.00159717373963726	1.7958569911481
PAK4	368	163	0	A_24_P313822	NM_005884	PAK4	1.00620681909775	7.13257799406292	5.6387067378912	0.000231848584809725	0.00278669954858961	0.759921420655227
LOC100130456	192	142	0	A_33_P3231572	AK095012	LOC100130456	1.00818672425313	8.26171515354849	5.53146091557367	0.00026855038805199	0.00307054283772004	0.608846123112014
PRIMA1	146	162	0	A_23_P502808	NM_178013	PRIMA1	1.00865277911907	6.59566847168632	4.2068696831475	0.00188773056212123	0.0109383316293487	-1.39536741363521
FLJ46020	211	33	0	A_33_P3263851	NM_001288961	FLJ46020	1.00884000526881	5.9660977956965	4.28398557738687	0.00167366692141506	0.0100692008825762	-1.27200952458818
Q6UXP8	257	108	0	A_19_P00318741	ENST00000430650	Q6UXP8	1.00978692812572	6.38595324507842	5.26112040261171	0.000391765492462111	0.00391977257593172	0.22045179859458
LGALS8	275	112	0	A_23_P63026	NM_006499	LGALS8	1.01003229821278	8.75316455706149	5.72654514322919	0.000205802383529161	0.00261116672293396	0.882390413520767
ARHGAP33	150	82	0	A_23_P404730	NM_052948	ARHGAP33	1.01029514180575	10.0230742025928	5.13396625753867	0.000469597358994703	0.00437040357737025	0.0340246494483214
MAB21L2	42	62	0	A_24_P148907	NM_006439	MAB21L2	1.0110042800267	5.69871054174154	4.37821175446063	0.00144638737577947	0.00912012388081383	-1.12231260255326
MED16	24	59	0	A_23_P56170	NM_005481	MED16	1.01119860418774	9.14375471432499	6.9486627565154	4.36014353904722e-05	0.00112788247231347	2.47110517805893
GTPBP1	135	73	0	A_24_P168760	NM_004286	GTPBP1	1.01132248997962	10.0653228665822	3.68370762219801	0.00436029219279592	0.0194479538526873	-2.25024560120325
RTKN	50	124	0	A_23_P120056	NM_033046	RTKN	1.01135158834537	8.58980292292206	6.11734403885559	0.000122672642067707	0.00192974838924073	1.41353970670914
LOC100287789	141	11	0	A_21_P0013928	A_21_P0013928	LOC100287789	1.01141063458559	5.79791118410218	6.25165230210631	0.000103174739737519	0.00176830040050137	1.5909695442553
XLOC_007308	28	20	0	A_21_P0006135	lnc-IFNK-1:1	XLOC_007308	1.01183427225534	6.14561697531297	2.9933596628653	0.0137763109611007	0.0443134899210228	-3.41027435916204
CAPNS2	28	62	0	A_23_P152406	NM_032330	CAPNS2	1.01211383597924	7.01094593015098	3.22649976804565	0.00929891215140722	0.0331927528455738	-3.01652868176353
CRYBB2	240	33	0	A_23_P425066	NM_000496	CRYBB2	1.01216756249386	7.6501539465341	4.54055030057939	0.0011281063478014	0.00769264168973538	-0.867161844264647
XLOC_005832	241	23	0	A_19_P00329086	lnc-MOXD1-1:1	XLOC_005832	1.01405991656459	7.58957457353817	3.86236192305155	0.00326339379855432	0.0159101191952346	-1.95507422376257
XLOC_002587	338	38	0	A_21_P0003219	lnc-OXNAD1-1:2	XLOC_002587	1.01414849910432	6.87273231108347	5.25802453071429	0.000393486991574975	0.00393002593847547	0.215941208223556
AKR1C1	323	133	0	A_23_P257971	NM_001353	AKR1C1	1.014177265863	10.434736349887	4.12918309466241	0.00213281696339509	0.0118395860690432	-1.52038245978045
ZDHHC18	326	33	0	A_23_P51853	NM_032283	ZDHHC18	1.01446170154916	7.72824263461981	4.34948507210062	0.00151199986288483	0.00940567801187393	-1.16782844830364
DRD5	200	144	0	A_32_P54274	NM_000798	DRD5	1.01453402359342	5.87916055272395	5.498941596159	0.000280876938363518	0.00316975012358268	0.562699926228093
XLOC_007102	381	120	0	A_21_P0005846	lnc-CYP7B1-3:1	XLOC_007102	1.01717703645892	7.21037413030741	5.69727495712997	0.000214113818276785	0.00265989716530422	0.841706936929491
ECM1	101	105	0	A_23_P160559	NM_004425	ECM1	1.01742855504967	10.5699235506416	5.19226864048011	0.000432031882954433	0.00413623651306384	0.119801616691036
CASP5	207	8	0	A_23_P47304	NM_004347	CASP5	1.01834628433515	10.1700757989976	5.86168615060673	0.000171683317135008	0.00235203320736193	1.06859106066207
XLOC_l2_000417	369	29	0	A_21_P0010557	ENST00000449715	XLOC_l2_000417	1.0188562890305	6.53996721468953	4.74561064713971	0.000828584913400972	0.00630292058098027	-0.550043437489255
LOC100505490	249	83	0	A_21_P0014397	NR_109885	LOC100505490	1.01978529690809	8.5976002397659	3.98919498437356	0.00266296383905264	0.0137985426422327	-1.74745795569421
LOC100505904	147	99	0	A_21_P0005210	NR_108073	LOC100505904	1.02086022310686	6.31522161736985	6.10261290565802	0.000125042000923697	0.00194745315314682	1.39392108866257
MCM7	9	52	0	A_23_P93690	NM_182776	MCM7	1.02089243125414	10.2019006571387	2.9921820612866	0.013803805763282	0.0443847906216009	-3.41226319786442
XLOC_012841	168	136	0	A_19_P00813352	lnc-DYM-1:1	XLOC_012841	1.02194382447655	7.02033955391124	4.58399998277456	0.00105617652416161	0.00733729971476571	-0.799478704718792
RRP12	298	85	0	A_23_P24192	NM_015179	RRP12	1.02194956429426	10.0890397621828	3.57725677464079	0.00519119956417009	0.0220909281320983	-2.42745527350073
XLOC_001686	166	146	0	A_21_P0001917	ENST00000446520	XLOC_001686	1.02214863379631	7.39135201315742	4.96661108468209	0.000598194746993382	0.00510780435169797	-0.214975977606783
RNMTL1	361	50	0	A_23_P135357	NM_018146	RNMTL1	1.02311899697347	9.61917941830294	7.16266983250955	3.38694014489003e-05	0.00100755421203077	2.7281208773188
LOC646014	31	81	0	A_33_P3329301	AK126557	LOC646014	1.02331977831227	6.15880946230947	4.96303239499665	0.000601325339793833	0.00512141044766128	-0.220345386872164
XLOC_000090	34	51	0	A_21_P0001666	lnc-CDC42-1:2	XLOC_000090	1.02378126614758	9.50000564979366	4.06668178890933	0.0023542912537572	0.0126955843723038	-1.62148625101603
XLOC_009339	143	53	0	A_21_P0007151	ENST00000441638	XLOC_009339	1.02404659479715	7.00523039603243	4.56854783002448	0.00108118262694452	0.00746742180027728	-0.823519249334324
ZG16B	153	164	0	A_23_P118203	NM_145252	ZG16B	1.02609522853414	6.07896492163144	3.36651861050578	0.00735815580564448	0.0280374010901719	-2.78062230805764
C8orf67	378	124	0	A_33_P3546161	BF742660	C8orf67	1.0263379391762	5.79878103280984	5.31439842907969	0.000363370029439837	0.00373204766981396	0.29785360992302
KIF3C	201	162	0	A_33_P3369153	NM_002254	KIF3C	1.02661321210748	9.81075973305406	3.26073179547062	0.00878032846279312	0.0318674274208433	-2.95878824259841
SPRY2	230	21	0	A_23_P128698	NM_005842	SPRY2	1.02692433946419	10.8363540064274	4.67248946250156	0.000924323650123769	0.0067744424493673	-0.662446142304328
CCDC86	82	20	0	A_23_P161918	NM_024098	CCDC86	1.02695089557309	12.7957422833497	2.95977065809834	0.0145828766307113	0.0462031460233967	-3.46699325818848
MMP1	40	77	0	A_23_P1691	NM_002421	MMP1	1.02697027762505	6.14287623817304	4.12422012137123	0.00214957373183565	0.0119008802920073	-1.52839380251468
XLOC_l2_003705	40	123	0	A_21_P0011141	TCONS_l2_00006816	XLOC_l2_003705	1.02711375121535	6.60654196634448	6.01502629000022	0.000140188728181255	0.00208013258618668	1.27662705086349
TTC4	224	114	0	A_23_P230	NM_004623	TTC4	1.02800722635167	8.81253782598652	3.63540390588733	0.00471868504543771	0.0205997311771349	-2.3305443351318
ZC3HAV1L	15	92	0	A_23_P31532	NM_080660	ZC3HAV1L	1.0280142813286	8.38729405524735	3.63474779653371	0.00472375919716797	0.0206164800800684	-2.33163635606147
TTLL4	244	17	0	A_33_P3263387	NM_014640	TTLL4	1.02841809851014	7.08751542512598	6.48798866046844	7.65185076129128e-05	0.0015167994926099	1.89695186359225
UBASH3B	364	98	0	A_33_P3409477	NM_032873	UBASH3B	1.03143312479994	7.00183117020635	4.85518448434664	0.000704370637846699	0.00563872576065722	-0.383032815342162
C9orf150	276	14	0	A_33_P3375145	NM_203403	C9orf150	1.03163722687273	7.66573081569297	3.01076151404824	0.0133764502242375	0.0433706275370907	-3.38088237516611
ARAP1	5	54	0	A_24_P398432	NM_001040118	ARAP1	1.03265402735586	8.37036505237812	6.42134738360273	8.31866236094656e-05	0.0015819898870969	1.81146985511601
XLOC_l2_014504	32	124	0	A_21_P0013512	ENST00000518311	XLOC_l2_014504	1.0331322477413	9.65085856347251	5.70356950025016	0.000212296446852462	0.00265675217300984	0.850466574313523
TRMU	379	29	0	A_33_P3433156	NM_001282785	TRMU	1.0334614302821	8.37530103659995	3.28643905691965	0.00841052323605166	0.0309090903572435	-2.91545168191186
LOC100132339	326	83	0	A_33_P3242075	ENST00000559802	LOC100132339	1.03368341885845	6.62457549132972	4.42309373188981	0.00134984051144051	0.00874639948661511	-1.05141721715132
RAC2	53	117	0	A_24_P228717	NM_002872	RAC2	1.03418683139582	10.0819972651023	6.85208500542084	4.89526019012942e-05	0.00119225350156968	2.35312814779084
SHPK	67	162	0	A_23_P310350	NM_013276	SHPK	1.03492912893276	10.1562729203522	4.44225898551028	0.00131071581229839	0.00856955051690693	-1.02122545211736
WAS	293	65	0	A_23_P96331	NM_000377	WAS	1.0352622360861	5.91932121811035	5.92435994131359	0.000157974598848975	0.00223974369551071	1.15403506335111
STARD8	325	76	0	A_23_P387630	NM_014725	STARD8	1.03535941278469	8.80706342538635	3.60815601259416	0.00493426933711404	0.0212953349448142	-2.37592432165175
RNF126	133	8	0	A_23_P314086	NM_194460	RNF126	1.03587454672275	10.9076902847732	5.8146188788786	0.000182819393560073	0.00244428185961752	1.00404525886185
CDH4	47	123	0	A_23_P17593	NM_001794	CDH4	1.03593223934885	6.14037498880115	4.40460406454425	0.00138876046859191	0.00889479455835161	-1.08059109785315
XLOC_011719	20	46	0	A_21_P0008936	NR_110913	XLOC_011719	1.03616497814333	5.83554625751717	4.87743524064744	0.000681662609795414	0.00554212660643328	-0.349329637884465
HSPBP1	103	51	0	A_23_P10685	NM_012267	HSPBP1	1.03619411262332	11.5047465845463	3.98755344711144	0.00266994576603309	0.0138132380485544	-1.75013394532908
XLOC_007222	136	28	0	A_21_P0005976	lnc-ASAP1-1:1	XLOC_007222	1.03657291401658	7.5861513694773	6.57116020162897	6.89956171470342e-05	0.00145522990514316	2.00276703310556
XLOC_004414	32	22	0	A_21_P0004008	ENST00000515504	XLOC_004414	1.03699497438881	5.43704522678852	5.78383107617925	0.000190522937187155	0.00249130424693942	0.961648334279798
EDC3	220	143	0	A_24_P338992	NM_025083	EDC3	1.03778917682619	10.0434893547517	7.06964183539563	3.77749523484555e-05	0.00105409201201494	2.61713781291499
TSPAN1	89	48	0	A_23_P160167	NM_005727	TSPAN1	1.03792866161125	8.43048021496486	5.92176376164989	0.000158518425308641	0.00224187847282035	1.15050706107582
RNF187	299	125	0	A_24_P23995	NM_001010858	RNF187	1.03914695634948	12.3001073456406	4.4758882316866	0.00124494022672155	0.00824857051636411	-0.968367067927504
ZNF385C	162	149	0	A_21_P0011587	NM_001242704	ZNF385C	1.03925525973154	6.46472557362704	5.43742474714879	0.00030588822156899	0.00334589092785148	0.47497594977784
SNORD35A	24	141	0	A_21_P0000218	NR_000018	SNORD35A	1.03941213155881	6.90335991256258	4.66769017154455	0.000931006068154867	0.00679470062841301	-0.669850086650519
INCENP	8	57	0	A_23_P116387	NM_001040694	INCENP	1.03950104216444	7.05387683400899	5.44483423849025	0.000302752912938377	0.00332361293725479	0.485571748393286
SNORD33	143	140	0	A_21_P0000220	NR_000020	SNORD33	1.03971482934313	6.57984737298616	5.90675594808726	0.000161701928117136	0.00226941231718902	1.13009333260971
XLOC_007832	268	96	0	A_21_P0006389	ENST00000423632	XLOC_007832	1.04003141365298	6.17962336297926	6.04855625020296	0.000134168549994841	0.00203192170396732	1.32166089090531
ZYX	175	154	0	A_23_P254888	NM_003461	ZYX	1.0404147089111	11.1810254083665	3.52331323698131	0.00567362543995212	0.0235058259647258	-2.51758590911565
LOC100506035	148	45	0	A_19_P00318404	NR_038826	LOC100506035	1.04042817125575	6.55095654985459	6.10376466787809	0.000124854983758036	0.00194745315314682	1.39545611029121
HAMP	332	67	0	A_33_P3336720	NM_021175	HAMP	1.04064878470792	6.27314333117122	4.63886172615899	0.000972242606377445	0.00700191312441009	-0.714392284524435
XLOC_014255	20	19	0	A_21_P0010363	ENST00000420096	XLOC_014255	1.0407081848329	6.05310556370121	4.87858753951633	0.000680508095697444	0.00553814575780347	-0.347586203469955
MIB2	49	24	0	A_33_P3308903	NM_080875	MIB2	1.04114284924133	10.3230283800037	6.460145896522	7.92314035536474e-05	0.0015428915429209	1.86131316450371
NOS3	282	141	0	A_33_P3305790	NM_000603	NOS3	1.04153417449584	6.86464597782267	7.36459726263689	2.68173850424848e-05	0.000914257403870804	2.96516537168137
C22orf36	37	68	0	A_32_P198325	NM_207644	C22orf36	1.04199272014609	8.48121518523171	4.69189797238289	0.000897815571271591	0.0066150860689135	-0.632537415684601
JUNB	294	76	0	A_24_P241815	NM_002229	JUNB	1.04252423817504	7.92384101271824	5.17368238214821	0.000443645611010064	0.00420164424890089	0.0925112530920602
PLEKHO2	115	67	0	A_23_P129246	NM_025201	PLEKHO2	1.04288708165396	10.7331354427157	3.13219908786021	0.0108964926625328	0.0373115096754079	-3.17573460203708
NAT6	339	72	0	A_23_P212400	NM_012191	NAT6	1.04320647142011	8.83676925186198	4.27498907930649	0.00169726159799679	0.0101381821854563	-1.28636204115037
WDR4	14	29	0	A_23_P143535	NM_033661	WDR4	1.04348985506085	6.1274553522173	3.30214530842873	0.00819251783403784	0.0303084953580361	-2.88898627978789
TOM1	278	138	0	A_33_P3751889	NM_001135732	TOM1	1.04353399751266	12.6623983275515	3.4564736728263	0.00633669447260036	0.0253196640842277	-2.62953726823314
CTAGE11P	258	72	0	A_24_P332623	NR_027466	CTAGE11P	1.04403124454938	8.67420066736716	4.28411203667025	0.0016733377444717	0.0100692008825762	-1.27180785191748
LINC00322	161	97	0	A_33_P3416622	AK131425	LINC00322	1.04410797387781	6.77884427796758	7.29975406083917	2.88905394968751e-05	0.000941854202501843	2.88961563531986
ORAI1	360	109	0	A_24_P146892	NM_032790	ORAI1	1.04414818644793	9.60328784457787	6.30921937339271	9.58664078174477e-05	0.0017154011684542	1.66622944878912
TBC1D10A	22	106	0	A_23_P166421	NM_031937	TBC1D10A	1.04511759468576	9.85186637052786	4.31114073376354	0.00160452792357315	0.00978039907749912	-1.22875042299128
NPRL3	97	73	0	A_23_P100326	NM_001039476	NPRL3	1.04522502620163	9.57060294957354	6.07424572446786	0.000129744807806919	0.00199131039183157	1.35605398407028
XLOC_l2_001945	3	71	0	A_21_P0010868	TCONS_l2_00003528	XLOC_l2_001945	1.04560973299262	6.82845407887941	4.88402146036715	0.000675091765238729	0.00552344036489418	-0.339367243012416
OR1J4	359	52	0	A_33_P3376090	NM_001004452	OR1J4	1.04739192827672	5.90359915131411	4.37268026141944	0.00145878312671335	0.00916360034235206	-1.1310685388769
TOX2	92	23	0	A_23_P154566	NM_032883	TOX2	1.04784901968026	11.7425531736505	5.8972243010004	0.000163759525072276	0.00228925146629477	1.11711122682608
XLOC_l2_013863	194	109	0	A_21_P0013432	TCONS_l2_00027379	XLOC_l2_013863	1.04831051211758	6.81650268542706	6.45333656082135	7.99105882954007e-05	0.00155155068812713	1.85258069834496
GUF1	17	119	0	A_33_P3362631	NM_021927	GUF1	1.0488250908015	9.88164701196661	5.96933736884138	0.000148865325298507	0.00216056906913989	1.21499969904713
XLOC_l2_004739	287	96	0	A_21_P0011332	ENST00000567704	XLOC_l2_004739	1.04914882339674	6.0008814320335	4.08936846227184	0.00227122348676432	0.0123688499725423	-1.58473454272487
XLOC_l2_008289	14	20	0	A_21_P0011971	ENST00000419201	XLOC_l2_008289	1.04985481635267	7.35394329541464	3.40564156153232	0.00689443664192212	0.026810088706298	-2.71485916471575
PGAM5	55	87	0	A_23_P319719	NM_138575	PGAM5	1.04995096451994	7.07078064476107	4.11241095523883	0.00219000597898877	0.0120598410770767	-1.547468230452
WASH5P	328	56	0	A_33_P3337259	NR_033266	WASH5P	1.05077241328545	7.36592107336794	4.46836517134642	0.00125934450655224	0.00830868124144705	-0.980178576276906
LOC100132831	160	150	0	A_32_P41496	NR_027761	LOC100132831	1.05087260973169	9.22915482252353	4.38721581798238	0.00142644772899675	0.00906624251504341	-1.10806846040942
CTU1	74	72	0	A_33_P3395971	NM_145232	CTU1	1.05093664743148	10.0303047874282	5.80176665414365	0.000185993646140452	0.0024571515868785	0.98636380265544
BCS1L	58	162	0	A_23_P154086	NM_004328	BCS1L	1.05181141294838	11.0521358738573	4.64480646707575	0.000963582913597918	0.00696715614480369	-0.705197657134564
IKBKG	91	163	0	A_23_P159920	NM_003639	IKBKG	1.05187044305431	10.2571312211711	3.7414136384961	0.00396904307945004	0.0181599254766707	-2.15457958840059
FAM129A	372	42	0	A_24_P233786	NM_052966	FAM129A	1.05217510543516	11.8449391305598	6.50105798508768	7.52798665172723e-05	0.00151459818395077	1.91364318779232
LOC100128881	73	101	0	A_33_P3294372	NR_036480	LOC100128881	1.0522092479145	5.77820385682452	5.73852733264163	0.000202500680688954	0.0025851111565956	0.899008351533055
C19orf68	292	74	0	A_23_P4922	NM_199341	C19orf68	1.05221634029708	9.92964835907947	3.36299130031225	0.00740151896337894	0.0281382712028594	-2.78655523820056
MRPS36	40	100	0	A_23_P29575	NM_033281	MRPS36	1.05238006045613	10.9847781322739	5.20888132074884	0.000421926571584909	0.0040818088014129	0.144150915700092
DHODH	234	9	0	A_23_P15202	NM_001361	DHODH	1.05274671569495	9.42566585857949	5.22691368391472	0.000411243408814016	0.00401515302836756	0.170534824614553
RABEP2	4	80	0	A_33_P3239152	NM_024816	RABEP2	1.05277513108097	11.4307221249982	3.76634355339999	0.00381153032426379	0.017661386924895	-2.11334318267101
SLC11A1	86	55	0	A_33_P3702055	NM_000578	SLC11A1	1.05322894281065	6.44184016255823	7.02146643531189	3.99872321982903e-05	0.00108577471066351	2.55921782029969
CNNM4	84	104	0	A_23_P119923	NM_020184	CNNM4	1.0532390328624	10.8681441863486	4.11224136699842	0.00219059241846654	0.0120598410770767	-1.54774227392364
MUC4	139	86	0	A_24_P239176	NM_018406	MUC4	1.0535540962492	9.30753243154808	5.58800981320944	0.000248477391442173	0.00292123137899446	0.688717869286391
CHTF18	99	54	0	A_23_P354297	NM_022092	CHTF18	1.05504533336021	10.1307563700464	3.9225405811317	0.00296251820055078	0.0148652381635468	-1.85635304544672
PPPDE2	144	112	0	A_23_P356330	NM_015704	PPPDE2	1.05589350187261	7.83470973760368	5.23596313894979	0.000405991596637354	0.00399965346444807	0.183757320227187
PRMT1	247	78	0	A_23_P39088	NM_001536	PRMT1	1.05589492371703	12.6432649267003	4.84670144308185	0.000713239226351609	0.00568509793544544	-0.395900896264686
XLOC_003463	259	59	0	A_21_P0003579	lnc-CPEB2-5:2	XLOC_003463	1.05591141410977	9.76561245288116	4.43499772270057	0.00132539593331747	0.00863840800200926	-1.03265862433179
ASMTL	229	123	0	A_23_P159539	NM_004192	ASMTL	1.05703555052072	12.0218384091709	5.68886417202981	0.000216568355186627	0.00268438409899853	0.829993156751568
ANKRD13B	146	107	0	A_33_P3235189	NM_152345	ANKRD13B	1.05716625768519	7.54175277386651	5.94870502316605	0.000152971692958479	0.00219875360914176	1.18707022408068
SLC12A4	290	27	0	A_23_P389391	NM_005072	SLC12A4	1.0576461461495	10.334400626275	6.55598713888182	7.03060382433241e-05	0.00147335757352017	1.98353484699171
GNG8	241	105	0	A_24_P79070	NM_033258	GNG8	1.05792440288324	6.09579383864496	5.25602032257177	0.000394605776703815	0.00393337949180731	0.213020381066148
GPER	129	59	0	A_23_P8640	NM_001039966	GPER	1.05834604885815	7.47612424774778	3.38292986531837	0.00715982871983954	0.0275542238761818	-2.75302659106116
XLOC_l2_005880	274	98	0	A_21_P0011552	NR_110875	XLOC_l2_005880	1.05845157641479	6.29516962606189	5.63149580711402	0.000234139003176013	0.00280411333854005	0.749816911311282
BLK	215	54	0	A_23_P31725	NM_001715	BLK	1.06162601820925	11.2860752772519	6.61250742187755	6.55569085852164e-05	0.00141648837888602	2.05501361165463
XLOC_l2_001192	382	111	0	A_21_P0010660	TCONS_l2_00001619	XLOC_l2_001192	1.06164114024974	11.5509050172808	3.92921373405747	0.00293099430894744	0.0147604093690313	-1.84542933212079
POGK	182	157	0	A_23_P137715	NM_017542	POGK	1.06187763716266	9.18238952579136	5.97448409078853	0.000147859613350631	0.00215095355895926	1.22195701831065
KCNMB1	75	138	0	A_24_P206121	NM_004137	KCNMB1	1.06214440460319	7.01570044388107	4.6310102560084	0.000983806833763659	0.00702165057684985	-0.726543595482229
DNAJC12	243	20	0	A_33_P3225066	NM_201262	DNAJC12	1.06263168665955	7.62216162271672	4.521168619177	0.00116185342673385	0.00786481764971931	-0.897437077128143
PTH2	315	162	0	A_23_P357374	NM_178449	PTH2	1.06431180746158	6.24047392149532	4.6218768082854	0.000997443497463766	0.00707472915296666	-0.740689794755228
XLOC_010430	269	38	0	A_21_P0008083	lnc-UCHL3-5:1	XLOC_010430	1.06440706868796	7.18875317678759	3.52701200380042	0.00563910479003598	0.0234172140596386	-2.51139933114872
ANAPC2	328	7	0	A_23_P253068	NM_013366	ANAPC2	1.06511754786994	6.54375694255352	4.10515663251284	0.00221524000100394	0.0121754151028455	-1.55919378611224
ZGPAT	160	101	0	A_23_P218654	NM_032527	ZGPAT	1.06551034849161	11.7760272363252	5.09323808108469	0.000497904806055172	0.00457254474314945	-0.0261940305740067
INPP5A	30	39	0	A_33_P3374190	NM_005539	INPP5A	1.06569843902604	7.12691043807078	6.99830946505895	4.11002819835853e-05	0.00110176013614274	2.53126773304977
FTSJD2	23	54	0	A_33_P3393245	NM_015050	FTSJD2	1.06594148954394	7.44596605343173	5.50166270713941	0.000279822558246553	0.00316252645714337	0.566567303680043
DUX4L9	133	119	0	A_21_P0012379	TCONS_l2_00018665	DUX4L9	1.06603414418972	9.11178255427563	4.85578535175987	0.000703746936317321	0.00563872576065722	-0.382121742539203
FLJ40039	191	36	0	A_33_P3325843	AK097358	FLJ40039	1.06623326349491	6.66648615862951	6.75895671567144	5.47921808162712e-05	0.00127483650868472	2.23817503742662
XLOC_l2_002761	153	2	0	A_21_P0011016	ENST00000532441	XLOC_l2_002761	1.06625973790185	9.80011790754791	6.53511815881496	7.21525528983994e-05	0.00148761061724559	1.95703071595666
TMEM82	20	51	0	A_33_P3326553	ENST00000375782	TMEM82	1.06666808208477	9.10686987537835	4.59339605119075	0.00104127189251491	0.00727151929421799	-0.784876408284511
FBRSL1	142	17	0	A_33_P3234457	ENST00000542061	FBRSL1	1.06700425726437	8.22738121544182	7.74410256604711	1.75063521974766e-05	0.000752582145713001	3.39676656691937
XLOC_000019	316	95	0	A_21_P0001254	lnc-MIB2-1:2	XLOC_000019	1.06719208241415	7.45498850111979	6.11472157682135	0.000123090870519827	0.00193085763840848	1.41004945682794
XLOC_l2_006013	21	140	0	A_21_P0011573	ENST00000421796	XLOC_l2_006013	1.06735984220093	7.9480226754599	4.18764036365075	0.00194549043711908	0.0111506404339479	-1.42624303731868
FASN	172	24	0	A_33_P3329344	NM_004104	FASN	1.06821667825816	10.322744199509	8.41788054687599	8.52074969820219e-06	0.00057790428541351	4.12062072605588
NQO2	189	153	0	A_23_P58953	NM_000904	NQO2	1.06834951818029	8.68988092457242	6.24875006479197	0.000103558781710621	0.00177088237805027	1.58716281872971
XLOC_007460	153	34	0	A_21_P0006029	lnc-CENPP-2:1	XLOC_007460	1.0697889454389	5.47342836753225	7.46516668889722	2.39146743944637e-05	0.000864392415025331	3.08128590989933
XLOC_004127	376	95	0	A_21_P0003526	ENST00000504957	XLOC_004127	1.07132378432582	6.46463446332478	4.76761214029961	0.00080188827198767	0.00616276274422275	-0.516371122789436
LOC100505937	301	52	0	A_21_P0014135	AV738989	LOC100505937	1.07133423200719	9.49840551321811	4.28131747255925	0.00168062805136502	0.0100855845488796	-1.27626499656206
ADM2	292	32	0	A_33_P3413910	NM_024866	ADM2	1.07149530412538	6.65994628664292	5.42349451546968	0.000311877488109109	0.00339136232011073	0.455033231253368
XLOC_l2_008047	309	40	0	A_21_P0012070	ENST00000448204	XLOC_l2_008047	1.07191056216414	6.75035256534904	5.52619551363384	0.000270506185398678	0.00308443705856028	0.601384951741054
ZKSCAN2	99	60	0	A_32_P64096	NM_001012981	ZKSCAN2	1.07202036179113	8.20590291337043	3.50254355943548	0.00587158692731729	0.0239800849772441	-2.55234257927486
LOC100505841	338	32	0	A_21_P0012952	NM_001195535	LOC100505841	1.07278099005151	5.90743718171389	6.09173059358724	0.000126824003889706	0.00196902244249638	1.3794081323153
LOC100129115	290	105	0	A_33_P3310226	AK095213	LOC100129115	1.07301763860588	6.51897066249658	5.66240355758582	0.000224489789122439	0.00274177081890815	0.793073065132908
SIGLEC14	242	87	0	A_33_P3382493	NM_001098612	SIGLEC14	1.0731944530941	7.24705470266438	6.51633878134154	7.38590629146508e-05	0.00150591681401212	1.93312862248964
GPSM1	2	9	0	A_32_P215938	NM_001145638	GPSM1	1.07325203935204	9.87259354680092	6.50432973206626	7.4973192383239e-05	0.00151208040183097	1.9178179247015
PRKD2	28	116	0	A_23_P78802	NM_016457	PRKD2	1.07353205168233	9.48068154058436	5.6147953276005	0.000239537523945285	0.0028503254367175	0.726385376682883
DUSP8	7	89	0	A_32_P98298	NM_004420	DUSP8	1.07366550396826	8.19617563453718	5.01035110441673	0.000561306812241915	0.00491501774278792	-0.149500380396288
SLC35C1	148	110	0	A_23_P202720	NM_018389	SLC35C1	1.07366649426726	11.0489120241876	4.01803809692626	0.00254336727061259	0.0133406660456975	-1.70048772553594
XLOC_001485	160	98	0	A_21_P0002222	lnc-VRK2-1:2	XLOC_001485	1.073938098974	5.45284482189391	4.47018408994492	0.00125584572888143	0.00829216567476643	-0.977322100436023
PANK4	198	65	0	A_23_P149690	NM_018216	PANK4	1.07414619654573	8.18328617121382	4.84190353140136	0.000718307841838868	0.0057145608105032	-0.403183533761307
LOC100288292	21	110	0	A_33_P3343206	ENST00000624628	LOC100288292	1.07478515376237	7.72660233312952	6.71782563158841	5.76077744815005e-05	0.00131825263061445	2.18702978595232
SUPT6H	295	26	0	A_23_P141479	NM_003170	SUPT6H	1.07498758754742	9.99247766200943	6.2425204216484	0.00010438834882875	0.00177920387537259	1.57898763321853
ITFG2	136	88	0	A_23_P204417	NM_018463	ITFG2	1.07506115019432	9.45294508554785	6.94995311632101	4.35343790764611e-05	0.00112788247231347	2.47267300413673
XLOC_007098	226	102	0	A_21_P0005625	ENST00000505627	XLOC_007098	1.07514575608856	7.35226415223129	7.49273775854915	2.31798271634305e-05	0.000854320222822099	3.11289816068832
MT1H	240	20	0	A_33_P3315314	NM_001276687	MT1H	1.07546900286429	16.6011373482287	6.42743793152454	8.25518680798856e-05	0.00158150364242624	1.81930819495305
COG8	266	127	0	A_33_P3287379	NM_032382	COG8	1.07555849249621	9.27495532887464	4.41142075295574	0.00137427504624719	0.00882546437517845	-1.06983011409144
TBX2	313	2	0	A_23_P164451	NM_005994	TBX2	1.07586511049631	10.6095551627257	3.40531658954888	0.00689816138465773	0.0268183128371092	-2.71540509508764
MT1G	19	94	0	A_33_P3233645	NM_001301267	MT1G	1.07618612944866	6.27237465663665	5.0113439796907	0.000560498217872442	0.00491438937449317	-0.148017368457285
DLST	335	43	0	A_23_P205697	NM_001933	DLST	1.07626932100945	9.81973446645902	3.02540483920109	0.0130491468334927	0.0425745666077468	-3.35614692708103
GPHB5	53	34	0	A_23_P336678	NM_145171	GPHB5	1.07803078082761	6.13384584806142	6.28255864144603	9.91790749274599e-05	0.00174101602657171	1.63143339247699
MID1IP1	213	107	0	A_33_P3217465	NM_021242	MID1IP1	1.07809116947559	12.756915575974	6.89808759005289	4.63199199995369e-05	0.00115781714735667	2.40947968766726
TBRG1	240	74	0	A_24_P21752	NM_032811	TBRG1	1.0785903365822	10.1270167834696	5.9411846962316	0.000154498645443022	0.0022092643214037	1.1768747170387
XLOC_l2_013242	28	155	0	A_21_P0013166	ENST00000510017	XLOC_l2_013242	1.07871335412537	7.21339249312849	4.33730606025539	0.00154076130202261	0.00950649723347949	-1.18715795595243
CSNK1D	63	32	0	A_33_P3324765	NM_001893	CSNK1D	1.07911983813897	10.0235203266258	7.12071826765326	3.55735387442288e-05	0.00103786266539424	2.67821243344448
SNORD104	249	6	0	A_21_P0000489	NR_004380	SNORD104	1.08028169818167	9.89536909879656	3.86270048514243	0.00326161424692479	0.0159060982844028	-1.95451777877513
VEPH1	70	37	0	A_21_P0000069	NM_001167915	VEPH1	1.08083184685686	7.85861084008174	6.21376387896423	0.000108311802491376	0.00181343348512949	1.5411784097333
C19orf26	53	143	0	A_33_P3361398	ENST00000382477	C19orf26	1.08084056713114	7.18118608108966	3.79862390239447	0.00361722678837668	0.0170368620490718	-2.06003492831005
XLOC_007725	325	104	0	A_21_P0006274	lnc-APBA1-2:1	XLOC_007725	1.08103237602207	10.1529358475002	3.11336716991026	0.0112478674035556	0.0381687325800785	-3.20754496099215
LBX1	290	13	0	A_23_P86493	NM_006562	LBX1	1.0814646604119	15.1275554798588	4.70168992721252	0.000884749789649216	0.00656527694688921	-0.617468086114496
ARMC5	277	120	0	A_33_P3221563	NM_024742	ARMC5	1.08176308374867	9.29053325563096	5.00819078254399	0.000563070479867416	0.00492135018278602	-0.152727652292652
LOC100132354	263	113	0	A_33_P3216282	NR_024478	LOC100132354	1.08187031432494	5.73087585314788	3.34335714539081	0.00764776373195977	0.0287966248983334	-2.81959053818445
CYP2R1	84	60	0	A_21_P0014273	ENST00000532805	CYP2R1	1.08224851232499	8.98801876070651	6.59345540105564	6.71177926808132e-05	0.00143348116444829	2.03096876633617
LENG1	63	19	0	A_23_P208523	NM_024316	LENG1	1.08317055060468	7.01092707596816	6.35607138971942	9.03308857789677e-05	0.0016517811819325	1.72713351530817
GTF2H4	154	106	0	A_23_P251259	NM_001517	GTF2H4	1.0834375391703	6.16868518980743	3.1723489815107	0.0101844139519375	0.0354200734917174	-3.10792954294593
CARD10	327	57	0	A_23_P434890	NM_014550	CARD10	1.08418820393035	11.7484754922856	4.2770427493927	0.00169184474295427	0.0101200867407092	-1.28308482172449
OAF	83	134	0	A_24_P391586	NM_178507	OAF	1.08433250704226	8.00933352301359	3.95639215123612	0.0028061960357053	0.0143356086350244	-1.80098853020915
PSD	374	135	0	A_33_P3233125	NM_002779	PSD	1.0848654957211	7.77783415253498	4.21856913763346	0.00185347646451041	0.0107767471535268	-1.37660452223567
LONP1	244	7	0	A_33_P3312365	NM_004793	LONP1	1.08613067629338	10.6396557561419	3.69755050424522	0.00426290573670454	0.0191468715739447	-2.22726993226437
XLOC_l2_009905	381	114	0	A_21_P0012502	ENST00000474979	XLOC_l2_009905	1.08755895561481	5.88707550406091	3.474797893496	0.00614728316292803	0.0248200654898735	-2.59881723280616
LOC387895	139	25	0	A_21_P0007786	NR_033878	LOC387895	1.08875370225467	7.862306444484	5.25473367999495	0.000395325799251125	0.00393412932480555	0.211144982369467
RRH	319	40	0	A_23_P253723	NM_006583	RRH	1.09028909729866	6.79201367381411	5.33449494097193	0.000353239199452555	0.00366871061326691	0.326940277069024
SLC15A3	153	139	0	A_23_P75786	NM_016582	SLC15A3	1.09101892017789	9.86992269512775	5.99597728672897	0.00014373811822196	0.00210786383051024	1.25096976704393
C2orf50	196	41	0	A_33_P3398998	NM_182500	C2orf50	1.09166044165571	6.68899834150993	5.08240958811893	0.000505734266136365	0.0046215179043147	-0.0422456339108148
AMPD3	99	93	0	A_33_P3216938	NR_103765	AMPD3	1.09245922063583	7.91666502390657	7.89305902453324	1.48707162159685e-05	0.000686236181279276	3.56135966269099
LOC100505495	47	99	0	A_19_P00315824	NR_040109	LOC100505495	1.09276766198135	6.7908691434425	4.154955886395	0.00204798555575112	0.0115495569983947	-1.4788269820242
PRR4	9	133	0	A_23_P76291	NM_007244	PRR4	1.09285812106606	10.2088595175246	6.07937800120817	0.000128880023378353	0.00198613534640147	1.36291363427079
LOC100506767	149	148	0	A_21_P0014558	NR_104063	LOC100506767	1.09307661602099	6.237342849024	5.65473470730496	0.000226843403800739	0.00275615456982216	0.782353496977482
ETV5	110	74	0	A_32_P30649	NM_004454	ETV5	1.0945075536547	7.56522680528353	2.92334999227518	0.0155118235692026	0.0481213163574202	-3.5284661738553
LCE1E	67	102	0	A_33_P3356811	NM_178353	LCE1E	1.09478511531999	6.83465300326818	5.11669562081733	0.000481385008244222	0.00444780524256267	0.00851899617903218
CNNM3	322	99	0	A_33_P3255274	NM_017623	CNNM3	1.09559605221471	8.14970842287545	5.30341053105231	0.000369040427974267	0.00376633788609844	0.281924950999538
LCP1	139	95	0	A_23_P204847	NM_002298	LCP1	1.09596670456075	11.5841602298891	3.66720907379517	0.00447940080785451	0.0198147472273097	-2.27765041720111
HAUS7	175	144	0	A_23_P416036	NM_017518	HAUS7	1.09597753228822	7.90349569343063	6.87760157600746	4.74728645418054e-05	0.00117511211055265	2.38442016381248
SPOCK2	155	149	0	A_33_P3214948	NM_014767	SPOCK2	1.09716141228944	7.14209380552865	5.43777512778837	0.000305739176651674	0.00334589092785148	0.475477188342737
DNAJB2	236	13	0	A_23_P209519	NM_001039550	DNAJB2	1.09747994069571	10.3036801142806	3.37720226268905	0.00722841046433823	0.0277141748965272	-2.7626561081469
NDRG2	383	70	0	A_33_P3334515	NM_001282213	NDRG2	1.09819796904663	7.13214126092946	6.29652243933376	9.74288825714635e-05	0.00172571573488917	1.64967074655593
XLOC_l2_014931	194	105	0	A_21_P0013704	ENST00000422343	XLOC_l2_014931	1.09823430481993	7.55927096419931	7.81833517181538	1.6134450809027e-05	0.00072253713985909	3.47912420908587
XLOC_013161	367	41	0	A_21_P0009795	lnc-EPN1-1:1	XLOC_013161	1.09853649093961	6.9502427168316	5.06065498318168	0.000521864446417556	0.0047065680367774	-0.0745456924103127
PPP1R13B	65	84	0	A_33_P3372501	NM_015316	PPP1R13B	1.09992833435964	7.58933083113308	4.94914774815812	0.000613638041939048	0.00519969284876022	-0.241195378859577
ATP5D	224	21	0	A_23_P5089	NM_001001975	ATP5D	1.10000543081728	11.2972005855226	5.44678268357714	0.000301934171841314	0.00332361293725479	0.488356731110803
LOC100505994	95	131	0	A_21_P0004569	NR_103549	LOC100505994	1.10039668035122	6.67009922029276	4.44313155733202	0.00130896336422209	0.00856145295821584	-1.01985202516703
RELL2	9	132	0	A_33_P3229027	NM_173828	RELL2	1.10275258070939	11.2480821366155	4.63577807489989	0.000976767110858092	0.00700442455510107	-0.719163662711209
ACSF3	299	62	0	A_32_P218332	NM_174917	ACSF3	1.1029981170125	9.43419991875699	5.26470474784465	0.000389782443206758	0.00390932313147585	0.225672305333184
EIF5AL1	224	66	0	A_33_P3265504	NM_001099692	EIF5AL1	1.10337373821531	7.27241070653671	4.74282694315891	0.00083202952397858	0.00631470607743015	-0.554308690577725
SLC5A12	317	4	0	A_23_P323943	NM_178498	SLC5A12	1.10358236530628	6.21833682677011	6.16200544112558	0.000115780524513892	0.00187079316961874	1.47282770482846
LENG9	269	113	0	A_33_P3338724	NM_198988	LENG9	1.10366208975937	6.44938702538277	7.56540713164694	2.13579207414249e-05	0.000835215027303751	3.19576467333631
TOMM40	57	113	0	A_21_P0000006	NM_001128917	TOMM40	1.10401233792488	9.90313766857178	3.32660623181098	0.00786453001037952	0.0293558605070384	-2.84778840575683
XLOC_l2_000720	180	8	0	A_21_P0010750	ENST00000424587	XLOC_l2_000720	1.10480987738432	7.76836843691545	4.14866881709047	0.00206834605510952	0.0116328753990782	-1.48895673292522
AATF	292	151	0	A_23_P89460	NM_012138	AATF	1.1054557622447	11.5475341707045	6.98369851900116	4.18198158736517e-05	0.00111112649543726	2.51359599851812
XLOC_004415	121	21	0	A_21_P0004261	lnc-PIK3R1-5:2	XLOC_004415	1.10606550451748	6.16573182785288	5.00423574527452	0.000566314694831265	0.00493422411150316	-0.158637793216258
TELO2	181	120	0	A_33_P3287770	NM_016111	TELO2	1.1080286632734	11.1252735606968	4.6088588589722	0.00101722820327753	0.00715549818118326	-0.760872553743155
CERS3	88	70	0	A_33_P3408305	NM_178842	CERS3	1.10805936653067	7.34340353070775	5.39616077267949	0.000323998351744675	0.00348674970394996	0.415818141793538
ZNF696	175	142	0	A_23_P60101	NM_030895	ZNF696	1.10808225012099	8.10166545687876	4.274309904544	0.00169905705164929	0.0101450148471059	-1.28744597720557
XLOC_l2_009292	124	4	0	A_21_P0012248	NR_110533	XLOC_l2_009292	1.10822065729155	8.91639667514571	3.32048377469099	0.00794533168948932	0.0296110247461303	-2.85809773919109
APEX2	193	41	0	A_23_P256682	NM_014481	APEX2	1.10964597676464	10.5888592738962	7.29005373763429	2.92153602014142e-05	0.00094677756173598	2.8782674950474
NOP2	251	137	0	A_23_P204364	NM_001033714	NOP2	1.11048521298924	10.0969231842845	6.26332340471908	0.000101645801919998	0.00175640453233596	1.60626583412277
RRP9	27	132	0	A_23_P6802	NM_004704	RRP9	1.1106636808923	11.4381796825664	6.68980580595525	5.96153603764309e-05	0.00134522263086322	2.15205565525203
LIN37	33	29	0	A_23_P165186	NM_019104	LIN37	1.11112884324479	10.6584622134814	4.51468940827534	0.00117337255798404	0.00791385159654095	-0.907569410425263
MUC6	309	84	0	A_24_P88079	NM_005961	MUC6	1.11140382263258	6.88252207149691	6.20274389482537	0.000109857277288915	0.00183243081466524	1.52665792485374
HSPA1B	348	4	0	A_33_P3415430	NM_005346	HSPA1B	1.11182847437769	11.4148059946139	3.41540360346781	0.00678351147926667	0.0264776283348415	-2.69846226953767
FCHO1	296	158	0	A_33_P3255509	NM_001161357	FCHO1	1.11227902887266	6.88893838724465	3.40862715764011	0.00686031375255302	0.0267139519142398	-2.70984383579226
DIRAS1	298	118	0	A_23_P386942	NM_145173	DIRAS1	1.11258912880541	9.97883613609256	3.82139086038669	0.00348643835511152	0.0166267704360513	-2.02249737047591
KCND3	271	124	0	A_32_P58407	ENST00000369697	KCND3	1.11383716469285	6.87515957116712	6.30276628759405	9.66571098827891e-05	0.00172212379761341	1.65781652254247
DHRSX	86	159	0	A_24_P378987	NM_145177	DHRSX	1.11454515529184	9.919212435511	7.56564162950093	2.13522996706063e-05	0.000835215027303751	3.19603101487161
SLC25A28	312	68	0	A_23_P75220	NM_031212	SLC25A28	1.11467262712187	9.68291018676194	7.30591618391421	2.86862346625474e-05	0.000938690441186968	2.89681827894644
GPR25	368	126	0	A_23_P316531	NM_005298	GPR25	1.11468833125748	6.27364279504662	5.91358328854802	0.000160245234646647	0.0022546666925494	1.13938400763007
TLN2	72	80	0	A_33_P3264815	NM_015059	TLN2	1.11543524716859	9.04714740204148	5.29124704081068	0.000375428281032014	0.00380660969793812	0.264271205286247
SLC17A7	363	112	0	A_23_P78750	NM_020309	SLC17A7	1.11579710083189	6.83648895506142	5.0563725393203	0.000525104012339838	0.004710666527501	-0.0809122298999974
LOC730102	317	115	0	A_19_P00805679	NR_037167	LOC730102	1.11584754922679	6.87510413077056	7.87999463847667	1.50836597404939e-05	0.000692804193918912	3.54702998608312
NXF3	83	58	0	A_23_P171336	NM_022052	NXF3	1.1159137944936	8.83200008551588	4.55951761832848	0.00109608661182625	0.00754533341587332	-0.837583767859972
RHBDF2	35	84	0	A_23_P329870	NM_024599	RHBDF2	1.11652963369581	12.053962888175	4.51651030701549	0.00117012306112921	0.0079015322559187	-0.904721269829703
PARP12	38	153	0	A_23_P111804	NM_022750	PARP12	1.11703590968218	9.04011807984832	5.49040113909651	0.000284214002764225	0.00319307592122971	0.550554671951719
MBLAC1	205	120	0	A_24_P221198	NM_203397	MBLAC1	1.11764472786865	7.95551669936797	7.25946788862565	3.02657685422474e-05	0.000954919390426705	2.84240696967018
C19orf48	79	98	0	A_33_P3288754	NM_001290149	C19orf48	1.11824341633998	11.2204921386346	6.26149430525559	0.000101883792137373	0.00175702080043116	1.60386987799874
LOC100506338	374	58	0	A_21_P0014473	ENST00000458030	LOC100506338	1.11911234248824	8.32629557872714	3.18737931119062	0.00993027996941238	0.0348197293223407	-3.08255338392405
CDKN2A	42	121	0	A_23_P43490	NM_058197	CDKN2A	1.11955622818898	8.43331660637261	3.2928701696519	0.00832054432119009	0.0306799353357029	-2.9046139808856
GOT1	5	147	0	A_23_P63825	NM_002079	GOT1	1.11960637953302	11.677931770032	6.58891289844521	6.74958547117838e-05	0.00143667915014156	2.02522843054713
LOC338797	69	58	0	A_33_P3259077	NR_103736	LOC338797	1.11980426371412	7.08968900190644	4.99255417482008	0.000576013903482016	0.00498425691920864	-0.176107313682629
SLC29A3	117	47	0	A_23_P46871	NM_018344	SLC29A3	1.1202504698202	9.13434469258408	4.05752069415352	0.00238873588655201	0.0128083405358551	-1.63634389464434
CCL16	163	35	0	A_33_P3292478	ENST00000621559	CCL16	1.12245460801418	9.2164398548986	6.03921286095031	0.000135817595023604	0.00204155657416897	1.30912824409752
TDRG1	117	24	0	A_19_P00322096	NR_024015	TDRG1	1.12267103316588	8.32833228697174	4.59719923300882	0.00103530271975141	0.00724364049069247	-0.778969418433046
SYTL3	274	37	0	A_24_P291826	NM_001009991	SYTL3	1.12335163446943	9.44966095065285	5.87492346024589	0.000168684616671316	0.00232468524649662	1.08668554569253
TRPM4	257	45	0	A_23_P153529	NM_017636	TRPM4	1.12494975026298	9.04890056738222	4.38585065533708	0.00142945208765093	0.00906624251504341	-1.11022741725047
WNT3A	207	54	0	A_33_P3417502	NM_033131	WNT3A	1.12533617346678	6.19588917734016	6.5547265784453	7.0416111463695e-05	0.0014736959809971	1.98193562127733
SLAMF9	61	158	0	A_23_P96833	NM_033438	SLAMF9	1.12580946469981	7.67852092342474	4.71807518243956	0.000863336782206896	0.00646623102974503	-0.592282342917832
FAM65A	52	70	0	A_32_P230868	NM_024519	FAM65A	1.12587648072268	12.8328768438279	4.67951200978291	0.000914637406281271	0.00671424491213992	-0.65161818847322
LOC100127888	209	61	0	A_33_P3381235	NR_024470	LOC100127888	1.12641056373706	6.41622703585473	7.35720388752277	2.70453949179662e-05	0.000917615547736047	2.95657828363584
RAB5C	25	136	0	A_23_P107211	NM_201434	RAB5C	1.1264810856711	6.75740227101682	4.04913921913502	0.00242071398196104	0.0129045357521565	-1.64994561866797
RBCK1	24	66	0	A_33_P3238315	NM_006462	RBCK1	1.12767886157816	8.78077126522091	6.68699527815292	5.98208720813714e-05	0.00134522263086322	2.14854164352578
METTL22	357	58	0	A_23_P15285	NM_024109	METTL22	1.12779584364274	9.73115851253848	6.32078943498916	9.446615608511e-05	0.00169763936809261	1.68129859752696
AKT1S1	262	105	0	A_33_P3344201	NM_032375	AKT1S1	1.12790512778632	9.6852546481238	4.74908343813252	0.000824308885542776	0.00628186721146254	-0.544723897027112
SCXA	1	81	0	A_33_P3299510	NM_001080514	SCXA	1.12824323053724	8.26773240673083	5.8064355893759	0.000184833700571733	0.00245231835492558	0.992789900414399
IL36RN	226	99	0	A_24_P68783	NM_012275	IL36RN	1.12875029070182	7.39497959017558	3.04774881678631	0.0125653806830159	0.0413117578050843	-3.31840035357488
C11orf95	37	133	0	A_33_P3285354	NM_001144936	C11orf95	1.12909736073712	8.03143933114097	5.55828756827497	0.000258818839236362	0.00300255086548646	0.646796161238665
ARID5A	291	146	0	A_23_P143016	NM_212481	ARID5A	1.12971049694408	7.60631034341203	4.71801149369955	0.00086341893767882	0.00646623102974503	-0.592380165106944
XLOC_003444	370	32	0	A_21_P0003332	ENST00000509453	XLOC_003444	1.13034074185258	6.53044965990349	5.63402958754659	0.000233331435309177	0.00279645207252919	0.753368315354495
IL1A	2	97	0	A_23_P72096	NM_000575	IL1A	1.13048154627973	7.1141059492656	3.20556250490664	0.00963151681837351	0.0340625163759948	-3.05186051461025
ARFGAP1	107	74	0	A_23_P210379	NM_175609	ARFGAP1	1.13093822975825	13.2943094559575	7.77452911688522	1.69292728335054e-05	0.000737716941743612	3.43060372210335
GUSBP5	267	20	0	A_21_P0012750	NR_003675	GUSBP5	1.13100070923643	6.04176721614097	5.92171388040817	0.000158528893750067	0.00224187847282035	1.15043926678488
TBX19	306	113	0	A_23_P137705	NM_005149	TBX19	1.13105664159506	8.12459243407737	3.97603039229755	0.00271950127843058	0.0140130441686901	-1.76892690463639
SLC18A3	205	5	0	A_33_P3270317	NM_003055	SLC18A3	1.13129866761257	6.95443210370334	7.41952225784338	2.51874507115165e-05	0.000881507860090658	3.02874156725329
SALL3	342	70	0	A_33_P3296024	NM_171999	SALL3	1.13191622989126	8.68398412660589	6.19538842692044	0.000110902066415787	0.00184015689683326	1.516956307935
XLOC_011984	236	130	0	A_21_P0009130	lnc-CMTM4-1:1	XLOC_011984	1.13295141445076	6.95128985019596	6.31208691787547	9.5517289696346e-05	0.00171283372341381	1.6699659849706
CISH	1	80	0	A_23_P144096	NM_145071	CISH	1.13348986355131	7.0013247296551	3.14559285113883	0.0106534434051831	0.0366231353047762	-3.15311263059408
XLOC_011515	110	58	0	A_21_P0008851	lnc-ITGA11-2:3	XLOC_011515	1.13402431220367	8.08666098967685	6.76945048799286	5.40979407951355e-05	0.00127104212876194	2.25118682783618
HKDC1	140	16	0	A_23_P202427	NM_025130	HKDC1	1.13412041831943	8.85834500028523	3.66942148400752	0.00446323361425069	0.0197537217799687	-2.27397416886588
CSF3	14	135	0	A_33_P3222424	NM_000759	CSF3	1.13430260689678	6.30144387826339	6.11734966427193	0.00012267174657958	0.00192974838924073	1.41354719254213
NAT9	49	73	0	A_23_P66421	NM_015654	NAT9	1.13444417763386	12.0199661943491	5.20557028550008	0.000423920263325788	0.0040939638647793	0.139301170868265
LOC100505928	251	28	0	A_21_P0014370	BX103273	LOC100505928	1.1345654595751	6.37687574895978	5.62774313803466	0.00023534058053569	0.00281042202949396	0.744555340263869
XLOC_012025	152	18	0	A_21_P0009073	lnc-MPHOSPH6-2:2	XLOC_012025	1.13462399949283	6.42327574426378	7.30666898130315	2.86613833989909e-05	0.000938690441186968	2.89769785896481
PPARD	121	20	0	A_24_P252130	NM_006238	PPARD	1.13533077549716	10.5824049955125	6.91770917427595	4.52440252984618e-05	0.00114373325864503	2.4334290524474
VPS4A	316	43	0	A_23_P329772	NM_013245	VPS4A	1.13591077138183	12.5686841021369	5.72192282837674	0.00020709150501874	0.00262153296512705	0.875974128545376
C19orf20	94	96	0	A_23_P366682	NM_033513	C19orf20	1.13594508066245	7.75797694812729	4.92900900455971	0.000631977368514537	0.00530880242537965	-0.271486815034748
CRTC1	325	20	0	A_33_P3420204	NM_001098482	CRTC1	1.13624069247196	8.81833286585293	4.34559887910065	0.00152111510913207	0.00944474714984386	-1.17399419097644
GRWD1	215	162	0	A_23_P142154	NM_031485	GRWD1	1.13628879315996	9.56453908335024	3.63010971648309	0.00475979121624668	0.0207302906853473	-2.33935691257864
XLOC_006443	32	158	0	A_21_P0005307	ENST00000441295	XLOC_006443	1.13635166179704	5.77255248173777	4.01414436835974	0.00255917717610857	0.01340249373681	-1.70682311128596
ARMC7	276	22	0	A_23_P15375	ENST00000245543	ARMC7	1.13712931092013	8.18118977939788	3.00872352144469	0.0134226615067931	0.0434612474327825	-3.38432476915431
DCUN1D1	302	115	0	A_33_P3290328	NM_020640	DCUN1D1	1.13770850361163	8.50837930829831	5.60065811512036	0.000244212044721063	0.00289149143781677	0.706517960028687
ITPA	47	7	0	A_23_P68529	NM_033453	ITPA	1.13837349617452	9.62710938723612	4.06632935264642	0.00235560665674957	0.0126955843723038	-1.62205765941167
PEX16	372	57	0	A_33_P3225086	NM_057174	PEX16	1.13899236259028	11.2837445526218	8.20261561264677	1.06718219902433e-05	0.000602869618347634	3.8950439613412
RUSC2	325	136	0	A_23_P216549	NM_014806	RUSC2	1.13932332738209	11.4293906160866	6.97768189849125	4.21200707832969e-05	0.00111329643731151	2.50631074424415
FIZ1	49	77	0	A_23_P107855	NM_032836	FIZ1	1.13985527158842	7.28481455280893	5.5250824443968	0.000270921582609938	0.00308533666592171	0.599807185748641
MAFK	283	8	0	A_23_P373598	NM_002360	MAFK	1.13987935980475	10.6228281871397	6.93454639712986	4.4342377757065e-05	0.00113176512189715	2.45393887431722
XLOC_005590	67	78	0	A_21_P0004995	lnc-ECI2-3:1	XLOC_005590	1.14038520061837	6.65097750033165	5.87755536767003	0.000168095149820821	0.00232004730809036	1.09028012189102
FAM99A	130	34	0	A_33_P3378785	ENST00000538190	FAM99A	1.14068067031532	7.52445659445322	6.00858344114208	0.00014137853093974	0.00209353328615568	1.267955017647
ZC3H3	99	128	0	A_33_P3423820	NM_015117	ZC3H3	1.14120936614662	11.8459480525908	7.1453692595797	3.45612016647435e-05	0.00102084230236341	2.70756673238978
CALY	107	114	0	A_33_P3294159	NM_015722	CALY	1.14143350490983	10.1374679301831	5.76735539662842	0.000194788274471432	0.00252921111801994	0.938902925538859
GPRIN1	99	153	0	A_24_P160466	NM_052899	GPRIN1	1.14194040358657	8.33281964827512	6.20098289140209	0.000110106443692893	0.00183243081466524	1.52433592607101
PTMS	365	88	0	A_33_P3333038	NM_002824	PTMS	1.14224055523588	14.6389653118119	5.12741082306533	0.000474034844875338	0.00439941308121351	0.0243486211679782
WARS	47	10	0	A_23_P65651	NM_004184	WARS	1.14299267068105	10.3628317985337	8.14567993882238	1.13351179263044e-05	0.000623207028166023	3.83450373697475
POLD1	375	141	0	A_23_P50455	NM_002691	POLD1	1.14391226211456	10.0504297864274	3.6721181580798	0.00444360990935027	0.0196982696859676	-2.26949380180107
TRMT61A	77	104	0	A_24_P373126	NM_152307	TRMT61A	1.14430564148524	7.5838178544453	5.83996131149359	0.000176729857943915	0.00238597307114402	1.0388390467484
RTBDN	123	10	0	A_23_P130653	NM_031429	RTBDN	1.14457264346103	8.22266253928846	5.22897578592659	0.00041004030944599	0.00401265212111265	0.173548905485691
PLEK2	138	160	0	A_23_P151506	NM_016445	PLEK2	1.14476253920502	9.22427361330794	7.07289752973658	3.76303096575662e-05	0.00105324602253134	2.62104102093973
XLOC_000712	125	8	0	A_21_P0001470	lnc-C1orf195-2:1	XLOC_000712	1.14579210831449	6.71774565521772	6.12903775013379	0.000120826306127277	0.00191699565121363	1.42909086564564
LRP5L	122	98	0	A_33_P3326545	NM_182492	LRP5L	1.14581642795812	6.96629822646922	4.7090890733154	0.000875011082683372	0.00651337381430594	-0.606090164908661
ZFAT	360	40	0	A_32_P109922	NM_020863	ZFAT	1.1467164654023	8.29934485963687	3.17506958162771	0.0101379239993379	0.0353201006199675	-3.10333594712579
PELP1	372	9	0	A_33_P3659808	NM_014389	PELP1	1.15002926034927	12.1979356843267	7.65923630075508	1.9232044272365e-05	0.000779434155832742	3.30179384647419
CAMK1G	239	136	0	A_23_P97402	NM_020439	CAMK1G	1.15011095897002	5.53709479981736	4.6710225112912	0.000926360767843701	0.0067774457758051	-0.664708887875975
XLOC_001414	46	48	0	A_21_P0002584	lnc-LCLAT1-2:3	XLOC_001414	1.15024419583644	7.65421676746567	4.77621939783368	0.000791694829312882	0.00610471682770228	-0.503216899753261
MYH14	133	3	0	A_23_P78734	NM_001077186	MYH14	1.15159869155638	7.90576525897629	5.91986610429398	0.000158917206806663	0.00224356080355271	1.14792767241105
LONRF3	17	23	0	A_23_P114414	NM_001031855	LONRF3	1.15217597380945	7.35003077651642	3.41127660471925	0.00683017911320005	0.0266210757278967	-2.70539358669961
NPPA	290	162	0	A_33_P3323699	ENST00000376476	NPPA	1.15231422484826	6.25864596544199	5.74581460702103	0.000200520566208492	0.00257752477813833	0.909104625583706
LTB4R2	319	37	0	A_23_P163173	NM_019839	LTB4R2	1.15361241264421	6.43130404038424	7.06518196440319	3.79740731861253e-05	0.00105787639666833	2.61178867164334
RNF185	218	7	0	A_32_P15421	NM_152267	RNF185	1.15399152584801	7.12101100894342	5.16436228119225	0.000449594711509932	0.00424110888960587	0.0788072448375168
KCNS1	26	10	0	A_23_P321846	NM_002251	KCNS1	1.15430200905578	8.79579500392467	3.12868853437845	0.010961131311896	0.0374720883490406	-3.18166425949343
LOC340508	122	22	0	A_24_P753476	NR_002942	LOC340508	1.15477456786973	8.14666093221592	4.60135832790798	0.00102881652991569	0.00720395456735185	-0.772511933893956
C16orf5	308	111	0	A_33_P3333360	NM_001199054	C16orf5	1.1548630194032	7.50914904196174	5.8536342434163	0.000173535389697926	0.00236048965875021	1.05757210183049
SNORD34	300	5	0	A_21_P0000219	NR_000019	SNORD34	1.155683661994	6.56554939139798	4.55652660500794	0.00110107112778328	0.00756713857992643	-0.842244737024894
ZSCAN10	324	155	0	A_33_P3407409	NM_001282416	ZSCAN10	1.15620785366284	5.60182503504385	7.83600067247455	1.58254881444867e-05	0.00071322897671672	3.49862571227324
PPAN	221	3	0	A_23_P16096	NM_020230	PPAN	1.15649448510418	7.41277411997117	4.74703404969461	0.000826829436548791	0.00629819459692104	-0.54786289481761
C8orf58	26	56	0	A_33_P3410849	NM_001013842	C8orf58	1.15750722281655	9.71370705263557	3.44030545765255	0.00650884162664226	0.0257677739206829	-2.65665962334572
LOC100652953	142	44	0	A_24_P366457	ENST00000480085	LOC100652953	1.15933005166636	12.4853568075003	6.43196609976551	8.2083336869851e-05	0.00157733961295933	1.82513242211485
MTHFD2L	28	65	0	A_23_P112846	NM_001144978	MTHFD2L	1.16004377587537	8.32024039188521	5.55070378697476	0.000261530911537912	0.00301929553382542	0.636078662683517
XLOC_001906	24	129	0	A_19_P00315810	ENST00000455068	XLOC_001906	1.16068265543253	6.70544344670831	5.66904734696801	0.000222471991663954	0.00272913174457277	0.802352769250996
SNORA64	54	84	0	A_21_P0000236	NR_002326	SNORA64	1.16159935652326	7.66225619291905	5.45144548487067	0.000299984482951313	0.00331175712490783	0.495019153136424
WDTC1	146	98	0	A_24_P102895	NM_015023	WDTC1	1.16167531469138	7.70778662467665	8.75694181993751	6.0309133660956e-06	0.000529730862968881	4.46557185775168
XLOC_001009	215	58	0	A_21_P0001741	lnc-HIST2H3PS2-3:1	XLOC_001009	1.16245636818612	7.09231476198751	6.74546629283338	5.56988788089802e-05	0.00128873280844278	2.22142552440991
FLJ43860	24	48	0	A_33_P3227686	NM_207414	FLJ43860	1.16371911939529	5.67846485582155	4.88250300408278	0.000676600661435009	0.00552344036489418	-0.341663520971371
LOC285141	75	6	0	A_32_P197340	NM_001290030	LOC285141	1.16459287233019	7.83580303038895	5.08591593908777	0.000503184711559847	0.00460228304660409	-0.0370461091700047
PPM1J	24	15	0	A_23_P201939	NM_005167	PPM1J	1.16489334330375	9.04664041139638	3.58394297186769	0.00513444677607715	0.021913354109994	-2.41629849662043
GDAP1L1	202	121	0	A_23_P17354	NM_024034	GDAP1L1	1.16563106062289	6.70701961719271	3.50422597485217	0.00585528769627206	0.0239546261621307	-2.54952609745267
MEF2B	289	148	0	A_33_P3344406	NM_001145785	MEF2B	1.16640060660917	10.6121483530479	6.25278308639444	0.000103025523904488	0.00176830040050137	1.59245241430004
NLRC3	89	45	0	A_23_P340019	NM_178844	NLRC3	1.16670337096948	8.91583037698688	6.67612872444166	6.06227011535814e-05	0.00135377155297254	2.13494496716403
SPRR2C	127	104	0	A_23_P126089	NR_003062	SPRR2C	1.16808906893355	6.17090953523511	6.60049743097139	6.65362220344473e-05	0.00143022828757659	2.03986209684948
NOC4L	295	58	0	A_33_P3394828	NM_024078	NOC4L	1.16817362145127	11.0411889941669	6.44478188234175	8.077279320287e-05	0.00156282690123881	1.84160074234831
FOLR3	183	64	0	A_24_P252996	NM_000804	FOLR3	1.16843914488402	8.26851861066299	4.168734565519	0.00200409929357414	0.0113985285529708	-1.45664347602936
ATP6	286	158	0	A_23_P337726	ENST00000361899	ATP6	1.16994143536836	15.6733558894689	3.59615843081709	0.00503242207476995	0.0215973246051774	-2.39592414786873
XLOC_006978	315	77	0	A_21_P0005787	NR_125425	XLOC_006978	1.17034056236489	6.55819671888247	7.1735289692137	3.34428586737486e-05	0.00100202263065824	2.74100230998378
FBLN1	12	71	0	A_33_P3249872	NM_001996	FBLN1	1.17065141788524	5.89941733002202	8.35896738445837	9.05812585075555e-06	0.00057790428541351	4.05940186042861
XLOC_012145	379	146	0	A_21_P0009229	lnc-KCNJ12-1:1	XLOC_012145	1.17074735360548	6.68904298489353	7.5498885013943	2.17335107800203e-05	0.000845777031966721	3.17812354301602
EPS8L1	185	84	0	A_33_P3220698	NM_133180	EPS8L1	1.17107407140752	8.76561208092872	6.14826331895851	0.000117855600636865	0.00188638635571947	1.45461562386621
SNORD36A	184	139	0	A_21_P0000250	NR_002448	SNORD36A	1.17117911359902	9.60277174017608	4.1338672418896	0.00211712787021011	0.0117839068459172	-1.51282390737201
TRAF4	1	41	0	A_33_P3402035	NM_004295	TRAF4	1.17129532247134	7.78333779623692	4.93733494169609	0.000624325402109848	0.00526614525253061	-0.258956300635656
LOC340037	210	36	0	A_33_P3679876	NR_038915	LOC340037	1.17426928674228	6.68004908871849	4.91619937342723	0.000643946180586905	0.00536374971119863	-0.2907849714943
NOP16	369	97	0	A_33_P3361257	NM_016391	NOP16	1.17533965955434	11.8750369347859	4.89570210250332	0.000663603975464361	0.00545655411019782	-0.321714420969159
TPP1	90	67	0	A_24_P38815	NM_000391	TPP1	1.175401703322	11.7390330433388	7.63681498162003	1.97182558333913e-05	0.000787737227646201	3.27655566263647
YDJC	5	82	0	A_24_P92367	NM_001017964	YDJC	1.17544975905027	8.01308365609111	4.39952325188419	0.00139966232440135	0.00893370676712721	-1.08861579509036
PLBD2	356	68	0	A_23_P10911	NM_173542	PLBD2	1.17579085928119	8.52132160355029	8.1344938007409	1.14706381460592e-05	0.000626522494672786	3.82256574016672
HINFP	155	84	0	A_24_P121171	NM_015517	HINFP	1.17581530291989	7.95044014059972	6.84241432621154	4.95264100492769e-05	0.00120271204812085	2.34124568968003
XLOC_014405	244	76	0	A_21_P0010455	lnc-C22orf26-5:1	XLOC_014405	1.1761985878722	11.7175355855466	4.73251578038361	0.000844922184173171	0.0063797294509253	-0.570117289562276
RASSF5	347	125	0	A_24_P171268	NM_182663	RASSF5	1.17716278403785	5.94159873159319	7.20433404068479	3.2264244418865e-05	0.000984414006911852	2.77746091828828
LOC100652791	256	107	0	A_21_P0014853	NR_045217	LOC100652791	1.17763017520524	7.04786008191212	6.54537871411327	7.12382148527503e-05	0.00147606644431837	1.97006944703913
GALR3	277	34	0	A_23_P256663	NM_003614	GALR3	1.17775040248194	14.0731039738247	4.72085088356731	0.000859764329125362	0.0064604483350922	-0.588019586843533
GAS2L1	383	78	0	A_33_P3418597	NM_152236	GAS2L1	1.17851721302249	9.4044817429252	6.21987436335708	0.000107464978208841	0.00181017095245813	1.54922239695282
XLOC_l2_001118	215	60	0	A_21_P0010655	ENST00000427962	XLOC_l2_001118	1.18001240462177	11.8929818510583	9.0341252130974	4.58212189786699e-06	0.000496112025389884	4.73850718850673
Q8VGA8	130	83	0	A_19_P00801960	ENST00000418134	Q8VGA8	1.18023669295335	7.81986190915457	5.67896612619872	0.000219495744003068	0.00270818310770387	0.816194673749832
CCDC102A	373	3	0	A_23_P65983	NM_033212	CCDC102A	1.18026395522622	9.07142422292694	7.12327335580439	3.54671302951063e-05	0.00103657355015119	2.68125870725121
XLOC_000676	234	65	0	A_21_P0001457	lnc-C1orf222-2:2	XLOC_000676	1.18120880426776	8.52828559218707	3.5151282020827	0.00575079885455146	0.0237175408815026	-2.53127955875364
XLOC_l2_000791	334	16	0	A_21_P0010599	TCONS_l2_00001041	XLOC_l2_000791	1.18192432970451	6.86978625436906	7.84367225522499	1.56933241814276e-05	0.000710421433528266	3.50708298422236
HIF3A	82	117	0	A_33_P3338152	ENST00000475432	HIF3A	1.18216926197693	7.32300819497534	6.18330088978214	0.000112642376540437	0.00185425825176595	1.50099639961304
SNPH	215	133	0	A_23_P102706	NM_014723	SNPH	1.18224890158935	6.94528517876016	4.62230350201143	0.000996801970365378	0.00707472915296666	-0.740028657479029
TNFRSF10B	214	119	0	A_24_P218265	NM_003842	TNFRSF10B	1.18269708161918	13.8099927882219	4.48945870913061	0.00121939709630708	0.00814512278563739	-0.947080220767169
CEACAM20	351	12	0	A_24_P118376	NM_001102598	CEACAM20	1.18306855231208	9.35815775149173	3.40848454232216	0.006861939746652	0.0267139519142398	-2.71008339604411
XLOC_007506	136	74	0	A_19_P00319099	lnc-RAD23B-2:1	XLOC_007506	1.18334078623749	6.62555450963532	6.17552556535119	0.000113777396562747	0.00185784887243341	1.49071908672413
CSF1R	86	8	0	A_23_P110791	NM_005211	CSF1R	1.183421125061	10.0589413761567	3.57384175598423	0.00522043778053956	0.0221685630859058	-2.43315495686042
SELO	349	122	0	A_23_P341065	NM_031454	SELO	1.18484850276149	8.83709021787858	6.47130470202085	7.8131844282812e-05	0.0015330958703267	1.87560945187696
XLOC_007600	115	122	0	A_19_P00318029	ENST00000446184	XLOC_007600	1.18496381756487	6.41020685196529	4.36806763088583	0.00146920575551159	0.00922211706144218	-1.13837305790522
ABHD5	41	7	0	A_23_P250294	NM_016006	ABHD5	1.18571222568385	10.9973380636242	3.48570064461173	0.00603737960982628	0.0245129678089437	-2.58054898320283
LOC644277	46	54	0	A_19_P00315764	XR_110541	LOC644277	1.18649745042602	7.27499814988976	7.17137387925799	3.35270440414966e-05	0.0010027415200849	2.73844709668611
FLJ45445	273	100	0	A_33_P3248900	NR_028324	FLJ45445	1.18740506122212	10.5358201785647	3.29002640522358	0.00836020899734386	0.0307738595727283	-2.90940609885418
IBA57	268	26	0	A_33_P3215128	NM_001010867	IBA57	1.18801388620296	6.95659649548085	7.08891327788348	3.69274590256787e-05	0.00105199769531653	2.6402218137504
DNAJA1P5	29	112	0	A_33_P3807268	AF395440	DNAJA1P5	1.18812398994741	11.5105609531184	4.05749593211998	0.00238882970435812	0.0128083405358551	-1.63638406734034
FAM123B	302	48	0	A_23_P308150	NM_152424	FAM123B	1.1892741141224	7.5227612915036	8.28851469914433	9.74973664216725e-06	0.000586356905133084	3.98568282989336
DPYSL4	217	141	0	A_33_P3410296	NM_006426	DPYSL4	1.18941142356801	10.0146432156943	5.44123734996594	0.00030427059890877	0.00333257324603629	0.480429105846714
XLOC_001209	271	99	0	A_21_P0001626	ENST00000420762	XLOC_001209	1.190292629717	7.66429062711101	3.37485354003722	0.00725672982444699	0.0277907729070029	-2.76660536490758
XLOC_009345	53	101	0	A_21_P0007309	lnc-GLB1L2-3:1	XLOC_009345	1.19092525869427	7.93182969226106	4.44025880848281	0.00131474230050869	0.00858913411144089	-1.02437411306979
JUN	186	27	0	A_33_P3323298	NM_002228	JUN	1.19117692853991	12.3369599495381	3.48742868423688	0.006020148351773	0.0244608905834601	-2.57765423569881
LOC652119	108	12	0	A_33_P3417123	A_33_P3417123	LOC652119	1.19126368759339	8.09357920207943	6.38151167315346	8.74706244184176e-05	0.00162449624546981	1.76007376821238
LOC100506465	117	25	0	A_21_P0007497	NR_110026	LOC100506465	1.1919795962772	7.31504166990477	6.51077890656928	7.43726337372745e-05	0.00151072713620267	1.9260426721792
DOM3Z	232	43	0	A_32_P181020	NM_005510	DOM3Z	1.19220073994538	9.33829368327771	7.01829190115308	4.01378656992547e-05	0.00108724667428274	2.55539040631941
XLOC_007207	144	16	0	A_21_P0005900	lnc-KIAA0196-2:2	XLOC_007207	1.1925841050825	6.80446289166405	5.38046770533337	0.000331184820148622	0.00352988350534606	0.393253544896687
IRF1	340	50	0	A_23_P41765	NM_002198	IRF1	1.19315686069683	9.22043423378784	3.69359485547768	0.00429050041622429	0.019224165259247	-2.23383361465873
XLOC_l2_010636	232	67	0	A_21_P0012722	ENST00000501725	XLOC_l2_010636	1.19438886870179	8.39763603181393	5.87411457197731	0.000168866229866022	0.00232491117631244	1.08558058780023
XLOC_013145	376	82	0	A_21_P0009665	ENST00000422045	XLOC_013145	1.19612044708366	6.95128153088203	6.39520833137932	8.5971358350348e-05	0.00160949610687609	1.77777044533717
SMCR2	328	25	0	A_33_P3877739	AI821758	SMCR2	1.19658302730423	6.92774084002934	5.57087534475073	0.000254383727459281	0.00297179419056393	0.664566555343892
ATP13A1	260	61	0	A_23_P5163	NM_020410	ATP13A1	1.19901993662172	8.62559937761053	7.32718041128265	2.79931755012496e-05	0.000930814991367897	2.92163587154227
RELT	378	39	0	A_24_P38951	NM_032871	RELT	1.19911695332426	10.5575620417424	3.78026289922666	0.00372644072516864	0.017409948691037	-2.09034445362847
LOC388152	3	102	0	A_23_P398275	NR_027001	LOC388152	1.19964794458385	8.49498580426626	7.3197186701565	2.82342815982218e-05	0.000933339583225679	2.91293380827415
LOC149950	299	63	0	A_33_P3290235	NR_034152	LOC149950	1.20050455473651	6.83110560590517	7.91431854915832	1.45311530949888e-05	0.000675849069162268	3.58463487522652
XLOC_011119	133	16	0	A_21_P0008550	lnc-BCL11B-1:3	XLOC_011119	1.20175047489492	7.32568860927255	4.68228228467246	0.00091084609747907	0.00669924288649176	-0.647348657069038
C12orf70	245	73	0	A_23_P389250	NM_001145010	C12orf70	1.2057116660155	7.31620027573178	7.65716175846534	1.92764795127612e-05	0.000779434155832742	3.29946125765558
DUSP1	18	141	0	A_23_P110712	NM_004417	DUSP1	1.20749498371784	12.5312466284291	5.34358272770502	0.000348757762223756	0.00364032303313631	0.340073799889111
UCA1	147	94	0	A_32_P200238	NR_015379	UCA1	1.20751892547885	9.05361856506729	4.76567242794414	0.000804204687590506	0.00616816109142276	-0.519336990750259
PHLDA1	6	14	0	A_24_P915692	NM_007350	PHLDA1	1.20770827822042	11.0557878172157	4.38357009354023	0.00143448595180319	0.00907735590345107	-1.11383459380356
XLOC_010354	188	149	0	A_21_P0008053	lnc-COG6-1:1	XLOC_010354	1.20789876624506	6.03150129839709	7.6846597971224	1.86964404362554e-05	0.000772279003346553	3.33033697230994
SMG9	210	117	0	A_23_P56127	NM_019108	SMG9	1.20802621388648	9.07880878423855	5.56881136557774	0.000255105307281327	0.00297262031770997	0.661654407586687
CYP4F8	226	6	0	A_23_P131060	NM_007253	CYP4F8	1.20807662651267	6.26750356657252	6.1590154837914	0.000116228632420439	0.00187439766456156	1.46886750280597
XLOC_l2_009468	99	9	0	A_21_P0012285	TCONS_l2_00017899	XLOC_l2_009468	1.20829862829227	6.46023790667068	7.31964266440824	2.82367490876138e-05	0.000933339583225679	2.91284513197771
NR4A3	114	85	0	A_23_P398566	NM_173200	NR4A3	1.20941456085709	8.39103148377616	5.3926158145886	0.000325606976131822	0.0034887078977718	0.410724147761208
LOC401357	135	91	0	A_24_P659122	ENST00000624628	LOC401357	1.20951334089919	8.18799783122044	6.64327200895384	6.31187437484326e-05	0.00139086660331367	2.09373464562536
ADAMTSL5	11	83	0	A_24_P22939	NM_213604	ADAMTSL5	1.21063516577497	9.43128192261489	5.37241577670171	0.000334938306370475	0.00355397276804188	0.381661725084775
MMP17	3	112	0	A_23_P136413	NM_016155	MMP17	1.2118659903953	9.67211594925174	3.51364611264818	0.00576488902083477	0.0237364924188769	-2.53375959447071
RILPL1	288	107	0	A_23_P169934	NM_178314	RILPL1	1.21206064131044	10.8357243866876	5.32884161721854	0.000356058124735356	0.00368262609301429	0.318764001744528
GARS	339	50	0	A_24_P154948	NM_002047	GARS	1.21276254798553	10.1913600349195	5.96072603680853	0.000150564574703998	0.00217164956709428	1.20335030405988
NKX2-5	149	63	0	A_33_P3299599	NM_001166175	NKX2-5	1.21436394806905	14.4837937938	4.11001849638956	0.00219829446482708	0.0120942495011738	-1.55133460244785
CSNK2A2	364	106	0	A_23_P14915	NM_001896	CSNK2A2	1.21468283281317	10.1788210123504	6.54849257752001	7.09632170494758e-05	0.00147414478196221	1.97402353263797
JMJD5	276	29	0	A_33_P3806721	NM_001145348	JMJD5	1.21495849001984	8.00927253410184	3.58862111682219	0.00509512251080448	0.0217887960390413	-2.40849441042468
TONSL	25	164	0	A_23_P216355	NM_013432	TONSL	1.21594273467772	6.74613110969109	4.10115140960534	0.00222930316939433	0.0122244771227584	-1.56567031322985
GPR88	362	107	0	A_33_P3380462	NM_022049	GPR88	1.21627895256619	8.21150401172035	4.55905078875732	0.00109686300143874	0.00754755916603385	-0.838311158638166
FBXO31	95	32	0	A_23_P395566	NM_024735	FBXO31	1.21728421658496	7.43077966832247	6.32210489923971	9.43083577919185e-05	0.00169718754418319	1.68301068921237
PAM16	196	5	0	A_23_P206830	NM_016069	PAM16	1.2177529253001	10.3885133348886	8.6019925845829	7.05338391617813e-06	0.00055146019216221	4.30947427826576
ABTB2	301	121	0	A_23_P356616	NM_145804	ABTB2	1.21778589966119	10.5981232482493	3.9033759131215	0.00305504550544691	0.0152194985272847	-1.88775113378713
TRIM69	222	59	0	A_23_P48826	NM_182985	TRIM69	1.21807018952722	7.71387427369828	6.85737115959349	4.86419963259753e-05	0.00118642315782492	2.35961797061145
CDX1	33	152	0	A_33_P3289848	NM_001804	CDX1	1.21827102980494	7.3675768320851	5.4255499800397	0.00031098588945313	0.00338830211406128	0.457977675221458
XLOC_005944	63	1	0	A_21_P0005187	lnc-DLL1-4:1	XLOC_005944	1.22035546235179	5.63203255933203	3.63658224816373	0.00470958635389612	0.0205815842260114	-2.32858320297988
SHISA8	216	83	0	A_33_P3222932	NM_001207020	SHISA8	1.22100648590265	6.89990320993935	6.59439076141462	6.70402295927869e-05	0.00143348116444829	2.03215042154548
C15orf39	325	156	0	A_23_P37514	NM_015492	C15orf39	1.2213875142021	8.94947438084585	3.67080604592117	0.00445314688983771	0.0197248003291163	-2.27167372317287
HSPB9	362	75	0	A_23_P416212	NM_033194	HSPB9	1.22151004299405	6.34171440791046	3.82070630467311	0.00349029784577256	0.0166270468039854	-2.02362531066593
NEUROG3	197	157	0	A_33_P3292844	NM_020999	NEUROG3	1.22177199112752	7.69962995106929	6.62322431165328	6.46961961111337e-05	0.00140868160517447	2.06851695931852
PRAP1	288	91	0	A_33_P3260969	NM_145202	PRAP1	1.22238417317802	8.97479684591132	6.16515973666224	0.000115309807109631	0.00186680862647166	1.47700418008735
WSCD2	217	78	0	A_33_P3222019	NM_014653	WSCD2	1.22248962565799	7.47716738268223	6.93791938703206	4.41641031701694e-05	0.00113176512189715	2.45804304103156
FAM160B2	106	5	0	A_33_P3269879	NM_022749	FAM160B2	1.22303965375918	9.14876473736677	5.37618663539191	0.000333174834830022	0.00354041092298576	0.387091574688549
WASH1	67	15	0	A_33_P3365932	NM_182905	WASH1	1.22310173700749	10.3594723349091	5.94118797177423	0.000154497976801728	0.0022092643214037	1.17687915957485
PPP1R13L	71	100	0	A_23_P119095	NM_006663	PPP1R13L	1.22421041683904	11.87369903335	7.02080960585988	4.0018348781283e-05	0.00108577471066351	2.55842601556723
XLOC_012812	115	16	0	A_21_P0009544	lnc-INO80C-1:1	XLOC_012812	1.22445811279919	6.05461251535398	5.78671270456499	0.000189787303634028	0.00248452096128585	0.965622446805051
XLOC_010996	4	39	0	A_21_P0008531	lnc-MBIP-2:5	XLOC_010996	1.225483089108	5.95949963060657	5.50758156176212	0.000277543757721154	0.00313890119475676	0.574975679338008
CD6	384	13	0	A_23_P311875	NM_006725	CD6	1.22562508664497	5.99894476700807	5.00235539402463	0.000567864096137601	0.00493739456031122	-0.161448466608407
PNLIPRP3	327	7	0	A_33_P3368193	NM_001011709	PNLIPRP3	1.22591356458234	6.14046973591367	3.8713485848722	0.00321650113803118	0.0157413902639428	-1.94030811764174
ZNF653	142	141	0	A_23_P325676	NM_138783	ZNF653	1.22646874053071	7.5954712474731	5.23693238433958	0.000405433372200461	0.0039965174837204	0.185172801690419
GPN2	147	141	0	A_23_P138025	NM_018066	GPN2	1.22685781850482	10.6627858790328	6.54898790112947	7.09195789764987e-05	0.00147414478196221	1.97465238650246
XLOC_009255	165	45	0	A_21_P0007129	NR_110303	XLOC_009255	1.22692619465741	6.12640488437396	5.85341829064561	0.000173585357720953	0.00236048965875021	1.05727644163851
TARP	220	9	0	A_33_P3378659	NM_001003799	TARP	1.22812625386789	7.59014513877973	8.00730405756793	1.31419702810838e-05	0.000658166010182995	3.68580970095094
NOBOX	53	82	0	A_33_P3236310	NM_001080413	NOBOX	1.22969287570172	8.94544529654402	4.86685392778914	0.000692362454062151	0.00558821033053361	-0.365348205015997
SLC6A4	7	155	0	A_23_P152995	NM_001045	SLC6A4	1.23115001955187	5.72344219125737	5.44516344868685	0.000302614410964724	0.00332361293725479	0.486042339941624
ALDH16A1	381	142	0	A_24_P5743	NM_153329	ALDH16A1	1.23168273282597	7.77323201610755	4.25378890296664	0.00175426348967595	0.0103816253905903	-1.3202242629649
THOC5	206	134	0	A_23_P109470	NM_001002878	THOC5	1.23265556727174	8.31061688400284	6.96938176838329	4.25381241379932e-05	0.00111597261419658	2.49625259680541
XLOC_001327	265	2	0	A_21_P0002566	lnc-SOX11-3:12	XLOC_001327	1.23412827490918	7.30239611114149	6.46469047310035	7.87815868247496e-05	0.00154040194238674	1.86713762920892
NOB1	73	104	0	A_23_P106822	NM_014062	NOB1	1.23653592915511	11.1544359510761	5.21282716128037	0.000419563741951701	0.00407407146765344	0.149928354726954
PRLHR	225	35	0	A_33_P3370364	NM_004248	PRLHR	1.23718357387129	8.00981075054139	5.13053667066215	0.000471913336033758	0.00438288374747941	0.028963261729066
ZNF142	58	30	0	A_23_P51051	NM_001105537	ZNF142	1.23718656941585	7.83379655011549	7.00557223120204	4.07476212560737e-05	0.00109673748626792	2.5400414155011
EMILIN3	93	32	0	A_23_P79816	NM_052846	EMILIN3	1.23824107368324	6.67325741674996	6.49651556252097	7.57078973278629e-05	0.00151526472396124	1.90784459536765
IPO4	321	53	0	A_23_P162970	NM_024658	IPO4	1.23859573905694	9.02176978691218	4.83594442705074	0.000724656689533472	0.00574017196791655	-0.412233339704801
MICAL2	246	66	0	A_33_P3315190	NM_001282666	MICAL2	1.23950877870634	8.91379629273612	4.9668371250936	0.000597997594834991	0.00510780435169797	-0.214636892925741
KLC2	96	131	0	A_33_P3288805	NM_001134774	KLC2	1.23998633798794	8.99234659600776	3.67094694300195	0.00445212176865832	0.0197248003291163	-2.27143963213511
LOC400891	353	35	0	A_21_P0010462	NR_110991	LOC400891	1.24067101962189	7.10324547363837	6.17374922935519	0.000114038429305612	0.00185784887243341	1.48836993315941
KLHL21	151	67	0	A_23_P341223	NM_014851	KLHL21	1.24137595408539	13.4843751363274	4.62323496197037	0.000995403058520826	0.00707335736162407	-0.738585502340319
ISOC2	258	33	0	A_24_P99795	NM_024710	ISOC2	1.24201982876215	8.81693011638253	2.90219128042661	0.0160788603211794	0.04941112969757	-3.56416203297693
WDR74	310	89	0	A_23_P36157	NM_018093	WDR74	1.24206408336536	10.5907925237022	5.09568712150619	0.000496152079285258	0.004558961659577	-0.0225660922599245
TMEM8C	222	50	0	A_33_P3277611	NM_001080483	TMEM8C	1.24228051696006	9.80386287213068	5.82847323264388	0.000179462828406423	0.00241492024105219	1.02307821909466
TMEM130	308	106	0	A_23_P349966	NM_152913	TMEM130	1.24310223252959	5.8111999916546	5.36562301212569	0.000338140301626156	0.00356749796376829	0.371875155425704
LOC389033	207	47	0	A_33_P3283601	NR_026740	LOC389033	1.24328607371963	7.50545623811853	6.29019849302002	9.82173444726486e-05	0.00173207423213022	1.64141482278093
CYP27B1	215	26	0	A_23_P36397	NM_000785	CYP27B1	1.24469912974402	6.66476256501248	4.01057908554101	0.0025737441175937	0.0134576281402993	-1.71262558855945
ARFIP2	161	32	0	A_23_P139228	NM_012402	ARFIP2	1.24508135248573	10.5604611354229	6.86826994322072	4.80083196490432e-05	0.00117960265049176	2.37298655809206
RAD18	27	161	0	A_23_P121222	NM_020165	RAD18	1.2457704540137	7.68865551937808	8.02297798723017	1.29223746773455e-05	0.000658166010182995	3.70276410081438
LOC727721	20	31	0	A_19_P00322569	ENST00000437157	LOC727721	1.24631858612942	7.10676626881394	7.08188108654743	3.72342976640335e-05	0.00105222811354725	2.63180406252081
BRD9	14	147	0	A_21_P0012880	ENST00000493082	BRD9	1.24656180280931	8.52163173630372	7.45740632959074	2.41260455170051e-05	0.000866197828163336	3.07237091497276
AP1S1	320	59	0	A_23_P157404	NM_001283	AP1S1	1.2466642462052	8.78300139063602	3.34416654893145	0.00763744712577174	0.0287660483084403	-2.81822833240156
LOC100289019	138	82	0	A_21_P0006396	NR_033374	LOC100289019	1.24694588430668	9.26867780004832	6.04431810667434	0.000134913862538127	0.00203988349441647	1.31597767444651
LOC100129596	220	89	0	A_33_P3364964	AK130913	LOC100129596	1.24750915031951	8.59850647749745	4.48379826007048	0.00122998328771546	0.00818629308431955	-0.955956252451885
LOC100652924	108	28	0	A_21_P0014745	CR933683	LOC100652924	1.24787063775192	5.942994717229	3.73307120422857	0.00402325916798778	0.0183525395617493	-2.16839147393947
AK8	150	86	0	A_23_P83200	NM_152572	AK8	1.24821210409437	7.02788506926117	5.24075330806322	0.00040324075438302	0.00398433435780945	0.190751505466148
CNFN	134	60	0	A_33_P3411848	NM_032488	CNFN	1.24832787337546	8.17879253930624	5.07594284688558	0.000510472689996383	0.00464443721608396	-0.0518398302819536
LOC284628	327	112	0	A_21_P0000910	lnc-MIB2-1:5	LOC284628	1.24859535785848	9.72913464790459	4.90678783160141	0.000652893997249554	0.00540447742698752	-0.304978986029645
TRIM27	229	54	0	A_24_P163405	NM_006510	TRIM27	1.24985593466013	9.8954925172987	8.54634414971405	7.46552113507319e-06	0.00056275165877459	4.2527831064503
MARCH4	246	89	0	A_23_P333228	NM_020814	MARCH4	1.2501417955572	7.59414489738293	3.25149002346678	0.00891732994793954	0.032234105858999	-2.97437317110713
FIGNL2	97	131	0	A_33_P3319581	NM_001013690	FIGNL2	1.25081689983265	8.69050222217772	5.36374022544877	0.000339033614363426	0.00357239783787496	0.369161347663708
TSEN54	366	109	0	A_23_P147277	NM_207346	TSEN54	1.25236242621368	10.4956238841958	7.08082028553456	3.72808235622694e-05	0.00105222811354725	2.63053368737331
MYCL1	279	54	0	A_33_P3306068	NM_001033081	MYCL1	1.25357346435957	5.65882623489125	5.80724405804021	0.000184633637505826	0.00245231835492558	0.993902312377532
SNORD68	18	143	0	A_21_P0000252	NR_002450	SNORD68	1.2537109332831	9.08902888228037	5.16145127608496	0.000451470282430195	0.00425639130447347	0.0745243561514002
SCLY	3	148	0	A_33_P3332126	ENST00000409736	SCLY	1.25376439801505	8.95418267621597	5.84037607043632	0.000176632030214345	0.00238597307114402	1.0394077043217
ZNF687	39	90	0	A_23_P331813	NM_020832	ZNF687	1.25390171731803	6.19194089054777	3.74530054676477	0.00394404390041925	0.0180969849046548	-2.14814651569714
IRF5	99	126	0	A_23_P500271	NM_001098627	IRF5	1.25393026974812	10.6888945088425	3.0777060732798	0.0119453570261552	0.0398473573685863	-3.26778962111809
Q58MP6	255	141	0	A_19_P00322207	NR_110655	Q58MP6	1.25405536955966	6.323615978896	4.79019541535347	0.000775436132401243	0.00601116357825608	-0.481880330332436
SBF1P1	351	28	0	A_33_P3416150	NR_027765	SBF1P1	1.25483028331563	8.4030154539761	6.05104460887809	0.000133733021076238	0.00202764955801766	1.32499648837906
E4F1	272	42	0	A_23_P15045	NM_004424	E4F1	1.25493934725674	8.72936472429864	8.7235417534584	6.23681618707264e-06	0.000532816004412529	4.43214087181708
CD14	221	87	0	A_33_P3284508	NM_001174104	CD14	1.25674488343607	7.18247092439378	6.59240919109768	6.72046628150266e-05	0.00143349869121066	2.02964692966407
LOC100130238	259	55	0	A_19_P00803351	NR_024563	LOC100130238	1.25696990897866	8.56514008638285	5.20069763351055	0.000426872623602899	0.00410818661848683	0.132161142011238
SPSB1	47	54	0	A_24_P96961	NM_025106	SPSB1	1.25758490241025	9.77803562128495	3.27572009626914	0.00856272862421907	0.031282126348874	-2.93351860352466
XLOC_010495	242	135	0	A_21_P0008116	lnc-COL4A2-3:1	XLOC_010495	1.25791497736404	7.8596174677245	7.22049525493173	3.16639985192931e-05	0.000975512398959393	2.7965389943764
DHX34	54	146	0	A_33_P3315856	NM_014681	DHX34	1.25937720955375	9.05318158891817	8.34859804273115	9.15647544894714e-06	0.00057790428541351	4.04858667547478
METTL1	163	24	0	A_33_P3700794	NM_005371	METTL1	1.25990985957625	9.56248644281135	7.23729069410872	3.10530124999508e-05	0.000963337309565513	2.81633001600439
COBRA1	151	163	0	A_23_P148150	NM_015456	COBRA1	1.26007240885815	10.7178448638824	3.10394675572966	0.0114279690145027	0.0385772109042756	-3.22345882252694
LINC00106	65	61	0	A_33_P3554053	BQ009527	LINC00106	1.26008938988916	7.61789040512729	5.34023733340344	0.000350400338651649	0.00364604574740651	0.335240515355506
UTS2R	362	8	0	A_23_P146885	NM_018949	UTS2R	1.2601307618012	13.5488186192588	4.63555401455369	0.000977096735796744	0.00700442455510107	-0.719510406363794
ZNF329	20	122	0	A_33_P3245674	ENST00000601887	ZNF329	1.26145904339758	8.88026219267084	4.78917991905741	0.000776605420377257	0.00601742776654173	-0.483429701484889
ZCCHC2	335	86	0	A_32_P134290	NM_017742	ZCCHC2	1.26266884022428	8.44310376852416	5.60069026169413	0.000244201304802943	0.00289149143781677	0.70656317006476
GPATCH4	266	146	0	A_33_P3211263	NM_182679	GPATCH4	1.26271758094449	9.93513191273762	4.21838092703227	0.00185402229077423	0.0107767471535268	-1.37690622868538
PADI1	251	139	0	A_33_P3358208	NM_013358	PADI1	1.26349339416332	7.46030562242332	4.45292240782667	0.00128946910477871	0.00846052218058627	-1.00444823887622
MIDN	64	60	0	A_33_P3338335	NM_177401	MIDN	1.26399644227165	11.4728464390937	6.32184813464998	9.43391359573584e-05	0.00169718754418319	1.68267652646587
HCN2	258	149	0	A_33_P3279640	NM_001194	HCN2	1.26510359112009	9.64742108044558	5.95673890113612	0.00015135841377157	0.00218121091264756	1.19795285400227
IL31RA	256	117	0	A_33_P3691168	NM_001297572	IL31RA	1.2659223759952	6.90526883500248	4.24438670838811	0.00178018782412398	0.0104983125413983	-1.33526019716758
CORO1B	318	160	0	A_23_P104583	NM_020441	CORO1B	1.26601368032313	8.51920301005698	4.27204970087596	0.00170504655312367	0.0101698426525196	-1.29105359495315
XLOC_006611	92	30	0	A_21_P0005335	ENST00000453087	XLOC_006611	1.26762080849012	5.80936151032195	5.53686094361337	0.000266560348817334	0.00305407173961554	0.616493792060239
XLOC_l2_005298	362	45	0	A_21_P0011499	NR_110934	XLOC_l2_005298	1.26808466037387	5.78810175641471	6.93752146653117	4.41850942232088e-05	0.00113176512189715	2.4575589406798
GEMIN4	180	115	0	A_23_P66872	NM_015721	GEMIN4	1.26854515966918	10.202567381502	9.43969804129029	3.10238502991905e-06	0.000423628132896897	5.12383554365958
FBXW4	110	153	0	A_23_P342825	NM_022039	FBXW4	1.26870220681592	9.65726174152904	6.08582198097012	0.000127803010527168	0.00198053056034613	1.37152107468429
XLOC_014268	33	20	0	A_21_P0010421	lnc-PPARA-2:1	XLOC_014268	1.26971564784081	7.08755881064567	5.65537387024553	0.000226646231182585	0.00275615456982216	0.783247255137082
XLOC_012586	206	133	0	A_21_P0009367	lnc-TMEM105-2:9	XLOC_012586	1.270982717891	8.0560434336891	4.60374762719748	0.0010251099095624	0.0071904446245895	-0.768803352364096
SLC7A5P1	337	37	0	A_33_P3311170	NR_002593	SLC7A5P1	1.27168438253613	8.81274278454667	5.82183073307592	0.000181063786422254	0.00242666260499463	1.0139563429046
RPH3AL	4	46	0	A_23_P94819	NM_006987	RPH3AL	1.27209432124956	8.17056247955138	6.05585678230002	0.000132895081446498	0.00202367382250203	1.33144457037152
XLOC_011150	207	36	0	A_21_P0008499	lnc-CDCA4-1:1	XLOC_011150	1.27218838567093	7.32593422878802	6.39727032968035	8.57480628757079e-05	0.00160949610687609	1.78043234507471
XLOC_007827	358	76	0	A_21_P0006310	lnc-C9orf152-1:1	XLOC_007827	1.27258833378572	6.69830945469277	6.51543110335476	7.39426433663562e-05	0.00150591681401212	1.9319720993102
XLOC_012829	316	37	0	A_21_P0009551	lnc-RIT2-1:1	XLOC_012829	1.27325081305953	8.1955741580968	6.61786631190897	6.51249780775426e-05	0.00141449414575461	2.0617678283291
XLOC_l2_010228	32	11	0	A_21_P0012540	ENST00000485770	XLOC_l2_010228	1.27395033815261	7.7583215900375	8.16392047420605	1.11178570644378e-05	0.000615323524373652	3.85393946557262
MRPS2	157	149	0	A_23_P135104	NM_016034	MRPS2	1.27454789593538	13.3409153226841	4.71506696018682	0.000867226346848857	0.00647853081262561	-0.596903424793839
HDGF	57	76	0	A_33_P3235400	NM_004494	HDGF	1.2750077658396	10.3296719301665	4.10021336554852	0.00223261040939281	0.0122345581612088	-1.56718742336615
SNX8	242	89	0	A_23_P414252	AK315670	SNX8	1.27710244184375	8.33397211313919	8.16643736911601	1.10882362617162e-05	0.000615323524373652	3.85661828239663
RTEL1	91	96	0	A_23_P378526	NM_016434	RTEL1	1.27731921549319	9.42248358915042	5.00875909512028	0.000562605941445651	0.00492135018278602	-0.151878592544032
GGT7	92	67	0	A_23_P57236	NM_178026	GGT7	1.27834840883672	6.82459616665621	4.35539071312641	0.0014982584110326	0.0093551300110165	-1.15846246743955
MOCOS	23	30	0	A_23_P67042	NM_017947	MOCOS	1.27854249879652	8.92869637825013	5.39101645001905	0.000326335535122799	0.00349314778203831	0.408425300178043
LOC100128348	15	27	0	A_33_P3283061	ENST00000568752	LOC100128348	1.27885755541621	9.28207482213842	7.09231666506812	3.67799432248385e-05	0.00105199769531653	2.64429344398279
CORO2A	154	68	0	A_23_P146444	NM_003389	CORO2A	1.28000405785146	7.1683417297184	4.04078697250364	0.00245302898095772	0.0130475765625079	-1.66350793576523
ADAT3	93	125	0	A_33_P3268793	NM_138422	ADAT3	1.2801172240678	8.41202700964963	3.21342026283862	0.00950528002269982	0.0337629978460888	-3.03859916372278
NUAK2	3	45	0	A_33_P3338166	NM_030952	NUAK2	1.28095635676748	8.62422242370217	6.90924966618933	4.57045210820488e-05	0.00115013839381549	2.42311001759512
Q9N083	376	19	0	A_19_P00317653	ENST00000602175	Q9N083	1.28132424669355	7.86187714553206	5.20433075509609	0.000424669221037356	0.00409882071451988	0.137485186581374
CHST13	62	120	0	A_33_P3345186	NM_152889	CHST13	1.28196500124506	7.00247642408926	6.99605612168418	4.12103698398939e-05	0.00110196396655344	2.52854419244387
GCLC	271	54	0	A_23_P145114	NM_001498	GCLC	1.28208660193498	10.6243526016353	5.84241616257769	0.000176151688818887	0.00238578128783238	1.04220441672406
LOC100506178	14	45	0	A_19_P00316371	NR_038393	LOC100506178	1.28312336256579	6.00914763817386	7.31655258490635	2.83372654905671e-05	0.000933339583225679	2.90923929592157
XLOC_006973	381	149	0	A_21_P0005785	lnc-ERICH1-5:1	XLOC_006973	1.28390434692898	9.4048346346976	6.7320123788578	5.6619324172745e-05	0.00130279188037812	2.20469664258427
PTPN23	264	47	0	A_23_P212329	NM_015466	PTPN23	1.28401036122002	11.3688765848622	5.34114489537031	0.000349953910842109	0.00364595509738505	0.336551886754426
XLOC_l2_014191	253	108	0	A_21_P0013475	ENST00000511103	XLOC_l2_014191	1.28454536345536	9.70417843204529	6.29914412582351	9.71040206815587e-05	0.0017245798299937	1.65309169544066
XLOC_008746	100	42	0	A_21_P0006974	lnc-C10orf114-1:1	XLOC_008746	1.28462228348795	10.311236981176	9.01068467172514	4.68859225164789e-06	0.000496112025389884	4.71573309851961
XLOC_l2_013783	191	95	0	A_19_P00801735	ENST00000437235	XLOC_l2_013783	1.28593746556343	8.5394863326377	4.36222719547269	0.00148251594004493	0.00929865702003334	-1.14762592002861
LOC388796	68	164	0	A_24_P608302	lnc-KIAA1755-5:7	LOC388796	1.28595714796129	9.58653090803164	3.99566686458868	0.00263562348648923	0.0136952126205315	-1.73691058656076
FAM3B	231	35	0	A_23_P166269	NM_058186	FAM3B	1.28679378501474	7.82598531949096	6.08146793099594	0.000128529654848683	0.00198613534640147	1.36570588155907
FAM203A	135	97	0	A_23_P61268	NM_016458	FAM203A	1.28847506932329	9.80343929487431	5.64328464248542	0.000230407004836366	0.0027765917132108	0.766332340394497
NFKB2	266	109	0	A_23_P202156	NM_001288724	NFKB2	1.29061336396492	8.17338932625822	4.6951341135897	0.00089347489602565	0.00660647949085278	-0.627555656759305
SLC5A6	88	53	0	A_23_P102508	NM_021095	SLC5A6	1.29068482164885	8.26167309464146	5.31918380820694	0.000360929747432841	0.00371156090276771	0.304785159093882
LINC00482	116	136	0	A_24_P323084	NR_038080	LINC00482	1.2924533864471	6.85957471413581	6.68856896049146	5.97057068100701e-05	0.00134522263086322	2.15050935688578
EIF2B5	12	83	0	A_23_P110062	NM_003907	EIF2B5	1.29365480730424	9.79974178253172	6.15196976325574	0.000117291999948053	0.0018807098629788	1.45953035408593
AQP5	158	97	0	A_23_P366812	NM_001651	AQP5	1.2954028624683	6.52759595443222	5.8246597146177	0.000180380080845509	0.00242139546076175	1.01784206090945
AIF1L	205	66	0	A_33_P3260053	NM_001185095	AIF1L	1.29594738141862	9.28556192052989	5.78644684815949	0.000189855044343412	0.00248452096128585	0.965255849956027
NBEAL2	363	68	0	A_23_P409168	NM_015175	NBEAL2	1.29626794235561	7.73681526995945	4.76708626774068	0.000802515569075892	0.00616276274422275	-0.51717514178647
HMOX1	79	116	0	A_23_P120883	NM_002133	HMOX1	1.2963721994232	14.2769506400024	6.16250343184128	0.000115706071425864	0.00187079316961874	1.47348716927496
STX1A	164	138	0	A_33_P3212456	NM_001165903	STX1A	1.29651278986704	9.90514034642997	7.10309666468681	3.63168992046676e-05	0.00104310900663889	2.65718003678217
BIRC3	297	147	0	A_23_P98350	NM_001165	BIRC3	1.29682727171223	7.32528244824539	7.70535023273463	1.82725116917428e-05	0.000763275191227982	3.35350806397783
CLCN2	7	129	0	A_21_P0000083	NM_004366	CLCN2	1.29743697071132	8.59372606947928	8.12914336062875	1.15360815003795e-05	0.000627501005429331	3.81685059121241
ENTPD6	167	21	0	A_23_P79999	NM_001247	ENTPD6	1.29857901885752	10.612352763983	8.97698576587829	4.84641576172938e-06	0.000496112025389884	4.68289384191088
XLOC_l2_015295	148	86	0	A_21_P0013670	TCONS_l2_00029480	XLOC_l2_015295	1.29951196496985	7.13836091059156	7.3751808385568	2.64946145102367e-05	0.000911929303979406	2.9774456666608
LOC100506613	269	7	0	A_21_P0014421	ENST00000480319	LOC100506613	1.30203952217684	6.62667378783783	5.69136472090561	0.000215835469150967	0.00267729194384658	0.833476785938633
XLOC_006200	234	144	0	A_21_P0005252	ENST00000470135	XLOC_006200	1.30238464892296	6.24134253667357	8.60882162682784	7.00454034564925e-06	0.00055146019216221	4.31640818177421
KCNQ3	44	29	0	A_23_P123393	NM_004519	KCNQ3	1.30291866894922	6.5092012409222	5.70872361705751	0.000210820694584826	0.0026483115485907	0.857634812472932
GCAT	111	93	0	A_23_P40657	NM_014291	GCAT	1.303084960556	8.04678448184302	6.52713120858941	7.28730702775419e-05	0.00149322567989369	1.94687105613541
FKSG2	121	62	0	A_23_P255827	ENST00000510120	FKSG2	1.30417210781007	7.22668849197811	8.70377062615954	6.3623027982924e-06	0.000535301021801783	4.41229560862893
XLOC_l2_004115	338	24	0	A_21_P0011235	ENST00000425483	XLOC_l2_004115	1.30427890566158	8.26655090079635	5.32212397243046	0.000359439139960082	0.00369851552352996	0.309042257518242
DKFZP434F142	59	59	0	A_23_P111797	XR_242367	DKFZP434F142	1.30450471902975	9.67416413096749	3.74415111207602	0.00395141946767727	0.0181091325755256	-2.15004875721115
DRG2	211	66	0	A_23_P141656	NM_001388	DRG2	1.30474993649792	11.257601250485	7.64315995876491	1.95793221753226e-05	0.00078406713490072	3.28370403109029
XLOC_002624	319	60	0	A_21_P0003226	lnc-TRAK1-1:1	XLOC_002624	1.30496274579061	6.10765405421324	8.39061962362846	8.76496424950977e-06	0.00057790428541351	4.09234085421472
XLOC_l2_010493	77	117	0	A_21_P0012477	TCONS_l2_00019671	XLOC_l2_010493	1.30624597766159	7.61608608642062	6.53987258538674	7.17273084087481e-05	0.00148251269327709	1.96307428481912
LINGO4	307	57	0	A_33_P3293396	NM_001004432	LINGO4	1.30642612719475	7.47067984819316	6.34879357385662	9.11676056698884e-05	0.00166223949221972	1.71769331354287
C2CD4C	320	109	0	A_33_P3215412	NM_001136263	C2CD4C	1.30687726727847	7.22401504476854	7.07802588568493	3.74036857907266e-05	0.00105222811354725	2.62718651256108
OR8B8	284	65	0	A_23_P1819	NM_012378	OR8B8	1.30722499591702	6.467412548675	6.54907233516199	7.09121432234153e-05	0.00147414478196221	1.97475957901572
KIF21B	316	94	0	A_23_P126888	NM_017596	KIF21B	1.30818563538482	6.99786272112761	8.75515960708811	6.0417110249167e-06	0.000529730862968881	4.46379098090529
ASB10	372	78	0	A_33_P3290124	NM_001142459	ASB10	1.30884426677874	10.8894534341008	4.67615459688121	0.000919254767058671	0.0067402575547669	-0.656794063298552
XLOC_008183	265	38	0	A_21_P0006537	ENST00000439926	XLOC_008183	1.31027971858932	6.91700115293418	6.12650457539501	0.00012122371366124	0.00191797844700778	1.42572373566825
LRRN2	77	26	0	A_23_P11843	NM_201630	LRRN2	1.31367144149684	6.72091707594891	7.36163033254812	2.69086327506552e-05	0.000914838597945235	2.96172024356743
LOC100131193	129	151	0	A_33_P3318267	NR_024580	LOC100131193	1.31462245764365	6.56473268052487	6.6159564967831	6.52785564130858e-05	0.00141515658144691	2.05936119787129
SNORD124	286	52	0	A_33_P3755633	DA515661	SNORD124	1.31474675623145	6.50066198433755	4.85826319556833	0.000701181143959441	0.00562792888861138	-0.378365231477795
CDCP1	8	4	0	A_23_P113613	NM_022842	CDCP1	1.31485409463379	7.1987035786014	5.38569303433428	0.000328773134215288	0.00351091771980288	0.400770950366869
MARCH9	97	120	0	A_23_P47777	NM_138396	MARCH9	1.31583293357737	10.611306168867	6.71384944620775	5.78881522940561e-05	0.00132103935488586	2.18207328140572
OR11A1	159	62	0	A_23_P59099	NM_013937	OR11A1	1.31609198766158	6.65053242723699	6.63975671251397	6.3392307779063e-05	0.00139320904392007	2.08931681348939
VCY	161	160	0	A_23_P11390	NM_004679	VCY	1.31808654079313	5.92643346486812	8.48160124063095	7.97833740950574e-06	0.000571219561299982	4.18640260608612
APOA4	186	82	0	A_23_P87036	NM_000482	APOA4	1.31914092714858	7.3338900728684	8.82714443895106	5.6218798750715e-06	0.000508994004558783	4.53545532539988
XLOC_014379	166	26	0	A_21_P0010443	lnc-RPL3-1:1	XLOC_014379	1.31954252043139	7.61980144059338	5.53741268015623	0.000266357914275019	0.00305407173961554	0.617274933149364
PPDPF	108	11	0	A_23_P120364	NM_024299	PPDPF	1.32010573929708	14.2516004857473	6.46651038133518	7.86022293221326e-05	0.00153870098504983	1.86946926632306
XLOC_009356	177	12	0	A_21_P0007311	lnc-C11orf89-1:3	XLOC_009356	1.32026313933548	8.7764981110174	5.39260430285789	0.00032561221383615	0.0034887078977718	0.410707602725122
QPCTL	292	139	0	A_23_P130787	NM_017659	QPCTL	1.32234314590884	8.87218251230503	5.59080751333985	0.000247527083985481	0.00291417222057536	0.692657143302643
PITX3	148	139	0	A_33_P3240318	NM_005029	PITX3	1.32242610187319	8.22586075351828	7.01474024456654	4.03071233821398e-05	0.00109005903964784	2.55110673064425
XLOC_007607	111	156	0	A_21_P0006242	lnc-PPP1R26-2:1	XLOC_007607	1.32312061846629	8.2890092276506	7.1419590016234	3.46993682324027e-05	0.00102292876505796	2.70351053646427
ACCN4	44	73	0	A_33_P3250730	NM_182847	ACCN4	1.32332268099434	9.4746224526914	5.55386163650407	0.000260397926852174	0.00301247851627109	0.640542412588759
CASKIN2	375	101	0	A_23_P44363	NM_020753	CASKIN2	1.32395442614537	6.46088505569067	9.09985880920885	4.29736773230021e-06	0.000491402456186206	4.80207379623331
XLOC_004924	41	68	0	A_21_P0004423	lnc-ARRDC3-1:1	XLOC_004924	1.3244001711418	7.65914762446458	4.04090749170145	0.00245255947628025	0.0130475765625079	-1.6633121807762
XLOC_007290	142	151	0	A_19_P00321342	ENST00000478913	XLOC_007290	1.32491715442709	6.84786213529498	6.3844752965851	8.71438405907527e-05	0.0016215083917497	1.7639051424592
XLOC_l2_006665	100	57	0	A_21_P0011684	TCONS_l2_00012419	XLOC_l2_006665	1.32605601472196	7.37652515344818	4.48290192398851	0.00123166853893377	0.00818776368508119	-0.957362176322167
LOC283547	135	42	0	A_33_P3419180	NR_039982	LOC283547	1.32651415780754	10.9556379092497	5.5209587585496	0.000272466521491042	0.00310042334803229	0.593960295552074
DSCR9	384	97	0	A_33_P3254996	NR_026719	DSCR9	1.32694300613545	6.49772634866571	5.79596452631269	0.000187446050878826	0.00246655905338891	0.978373568030129
LOC100288420	208	81	0	A_21_P0014808	A_21_P0014808	LOC100288420	1.32927963953373	10.0847613568106	4.00372136520839	0.00260200886731618	0.0135628490990677	-1.72379050172794
RTN2	132	137	0	A_23_P89902	NM_005619	RTN2	1.32995265534271	8.30950376965304	7.483720026323	2.34174397156602e-05	0.000859275612826394	3.10256913880474
GYPC	325	75	0	A_24_P139901	NM_002101	GYPC	1.32996373462562	9.2425404337707	6.61308833611769	6.55099370229069e-05	0.00141648837888602	2.05574597370734
PAPL	132	105	0	A_33_P3358957	NM_001004318	PAPL	1.33036864902306	9.24536970820603	6.13927906476748	0.000119233905987961	0.00190078243048176	1.44269433498936
SPRR1A	216	145	0	A_23_P348208	NM_005987	SPRR1A	1.33143354247006	9.72638582138665	6.76685745075226	5.42685986687227e-05	0.00127104212876194	2.24797297496291
PHLDA2	73	86	0	A_23_P47614	NM_003311	PHLDA2	1.33146538349339	9.94281260788539	9.40023042509911	3.22043484819292e-06	0.000432655033355209	5.08704889397984
ZBTB7A	322	94	0	A_33_P3283780	NM_015898	ZBTB7A	1.3315960758915	7.33541491771588	9.86610325635404	2.08900336536322e-06	0.000374201151221353	5.51186359598824
PABPC1L	48	23	0	A_24_P92183	NM_001124756	PABPC1L	1.3321746655496	7.29610349888856	9.54610236464687	2.80701944346031e-06	0.000402712235892773	5.22226592634004
KRTAP10-8	149	11	0	A_33_P3293760	NM_198695	KRTAP10-8	1.33595876955698	7.03462378008359	6.12509051080893	0.000121446166952529	0.00191797844700778	1.42384373977079
MAPK8IP3	73	2	0	A_33_P3279841	NM_015133	MAPK8IP3	1.33608717932356	11.5326072633226	3.39564245929204	0.00701000240557638	0.0271265110509865	-2.7316595304564
BCORP1	201	105	0	A_33_P3261353	NR_033732	BCORP1	1.33621344957254	6.83754403279737	8.29877785240565	9.64550275791006e-06	0.000586356905133084	3.99645648943142
SCGB3A2	372	72	0	A_23_P145006	NM_054023	SCGB3A2	1.34110548344152	7.85296180523074	4.47854159114389	0.00123990164796557	0.00822601415908339	-0.964203010118817
TAF6L	145	58	0	A_33_P3266080	NM_006473	TAF6L	1.34140465113148	10.1607038374016	4.06745320879969	0.00235141476976445	0.012693525161862	-1.62023559058761
SLC25A25	238	4	0	A_24_P355267	NM_001006641	SLC25A25	1.34171889658486	9.30946544374444	6.22015201244751	0.000107426670221282	0.00181017095245813	1.54958777390529
ZNHIT2	121	2	0	A_33_P3213747	NM_014205	ZNHIT2	1.34234651028298	8.41779457506734	6.29646688203893	9.74357795487756e-05	0.00172571573488917	1.64959824116997
USP20	11	158	0	A_23_P217028	NM_001008563	USP20	1.34319957381446	10.4002577163919	6.32188961312874	9.43341632306569e-05	0.00169718754418319	1.68273050869558
PRDM1	175	42	0	A_33_P3342081	NM_001198	PRDM1	1.34367982970199	8.69219471036349	5.72664648178139	0.000205774218009263	0.00261116672293396	0.882531047358951
SH3GL1	136	91	0	A_24_P139094	NM_003025	SH3GL1	1.34442678093958	13.1766972080762	8.30886618906375	9.5442260630985e-06	0.000584548757298375	4.00703508346147
LOC388692	240	163	0	A_33_P3422740	ENST00000424684	LOC388692	1.34519840164819	7.17502538434409	6.18107148287447	0.000112966564294548	0.00185592701635391	1.49805048877802
HNRNPUL1	300	47	0	A_24_P376294	NM_007040	HNRNPUL1	1.34561991115117	8.95862428236067	7.03118020339537	3.9530102514277e-05	0.00107956061932023	2.57092106437179
CLCF1	372	33	0	A_23_P138760	NM_013246	CLCF1	1.34628760148457	10.3008877758727	5.353070194247	0.000344144190374121	0.00360572205499527	0.353771857179213
KRT7	9	112	0	A_33_P3350748	NM_005556	KRT7	1.34644283244852	11.3666751043056	4.70054787371058	0.000886263198977245	0.00657357908805072	-0.619224951157085
MAP3K14	216	100	0	A_23_P207319	NM_003954	MAP3K14	1.34837022632033	9.88391178380651	4.09060615116793	0.00226678138100265	0.012356777168234	-1.58273125563689
DYDC2	72	19	0	A_23_P75063	NM_032372	DYDC2	1.34977618235751	7.62693551513564	7.26289660985938	3.01460013843828e-05	0.000954757104681431	2.84643296792742
CCL24	353	23	0	A_23_P215491	NM_002991	CCL24	1.34990973973522	10.2286244234088	5.66668456050037	0.000223187354576439	0.0027323053123903	0.799053297773781
TRIM47	50	27	0	A_33_P3235053	NM_033452	TRIM47	1.34991151553261	12.6063691436121	4.83564918112414	0.000724972796716275	0.00574017196791655	-0.412681848600725
ZNF133	214	88	0	A_33_P3394234	NM_003434	ZNF133	1.35108571179357	9.46433412273256	4.27175159326389	0.001705838197356	0.0101709228810857	-1.29152946701817
MON1B	225	52	0	A_33_P3308626	NM_014940	MON1B	1.35209297908258	11.261946713577	5.33142203056695	0.000354768469485129	0.00367771495529108	0.322496583966971
Q9EPR2	304	117	0	A_19_P00318915	ENST00000522875	Q9EPR2	1.35256926545563	8.65900588639377	7.15248454601738	3.4274843530125e-05	0.00101418227063651	2.71602484808818
ATP1A3	162	25	0	A_33_P3283669	NM_001256214	ATP1A3	1.35264025642441	6.6440851449366	5.91896342507395	0.00015910727872079	0.00224434221524949	1.14670052204547
SPRY4	22	5	0	A_24_P269062	NM_030964	SPRY4	1.35316301907712	6.88856994041599	6.66560835945859	6.1410078355187e-05	0.00136404066042541	2.12176601676729
RPL13AP17	48	104	0	A_33_P3312802	NR_003680	RPL13AP17	1.3535055818839	7.37493528407912	5.66800581547375	0.000222787023934981	0.00273098530664668	0.800898442650042
HMGA1	384	57	0	A_23_P42331	NM_145901	HMGA1	1.35563297307283	11.2427107637315	6.28489591663739	9.88837755181424e-05	0.00173888174322342	1.63448791358352
XLOC_004512	69	104	0	A_21_P0004047	ENST00000506392	XLOC_004512	1.35573799766372	6.52139112765941	5.52808359516681	0.000269803117087398	0.00307852748462942	0.604060870790626
ZNF418	266	24	0	A_23_P27424	NM_133460	ZNF418	1.3574493625933	7.18585427732397	6.92699473663854	4.47443440637509e-05	0.00113454494331511	2.44474470180547
ICOSLG	153	53	0	A_23_P166280	ENST00000407780	ICOSLG	1.35774300317981	6.89270390207647	4.74486879780694	0.000829501405975768	0.00630701228760854	-0.551180007687313
PDE9A	264	159	0	A_33_P3419594	AK074662	PDE9A	1.35852538750159	8.31847420531349	4.8821949936842	0.000676907171232189	0.00552344036489418	-0.342129348906591
XLOC_012176	215	46	0	A_21_P0009166	ENST00000447729	XLOC_012176	1.35854350642882	5.64705808318165	4.5001952824899	0.0011995821327207	0.00804318548199149	-0.930256364391199
CABP5	142	67	0	A_23_P21747	NM_019855	CABP5	1.35937599335364	7.54726367830099	5.10708470628594	0.000488081425924726	0.0044996947838849	-0.00569365974027836
MAD1L1	85	41	0	A_21_P0012258	NM_003550	MAD1L1	1.36024123994813	8.10569108447294	7.24579328783351	3.07485921857235e-05	0.000962637583301879	2.82633523726791
FAM84A	150	9	0	A_24_P413920	NM_145175	FAM84A	1.36126869168477	6.07360241419237	5.13707833348851	0.000467506315507798	0.00436309197416583	0.0386159522492839
KRT34	180	121	0	A_23_P101054	NM_021013	KRT34	1.36256845738512	9.41878304461672	4.90922720137289	0.000650562155765739	0.00540097241676006	-0.30129881589847
LOC644962	185	52	0	A_33_P3570228	NR_077215	LOC644962	1.36341823658439	8.62005345266966	8.57966812130623	7.21566398371802e-06	0.000553943531358334	4.28677183287076
XLOC_l2_015100	323	78	0	A_21_P0013714	ENST00000492533	XLOC_l2_015100	1.36380500272447	8.00157549365014	7.08388465109113	3.71465945794507e-05	0.00105222811354725	2.63420305258324
C19orf69	135	24	0	A_33_P3325634	NM_001130514	C19orf69	1.36482447289988	7.99778696449393	6.24516263363381	0.000104035627156483	0.00177574745163919	1.58245569534568
MIER2	157	23	0	A_33_P3227324	NM_017550	MIER2	1.36712833756776	10.9568388043363	7.52669246665196	2.23083586682203e-05	0.000847841933454762	3.15169923785913
PTGIR	101	76	0	A_23_P340848	NM_000960	PTGIR	1.36795815268146	5.79674331418156	7.47787381264879	2.35728972616809e-05	0.000863078891169984	3.09586737906808
FLJ40434	371	97	0	A_33_P3309365	NR_002314	FLJ40434	1.36874421826619	8.26676528289082	4.96488294343882	0.000599704325012839	0.00511021705902245	-0.217568619935762
PLAGL2	47	121	0	A_33_P3328292	NM_002657	PLAGL2	1.3689626667769	7.83838650136149	8.67190153144554	6.57040770303041e-06	0.000544826866603699	4.38021927187989
IL15RA	4	26	0	A_23_P138680	NM_172200	IL15RA	1.36968594515464	7.40919861769	6.93415783988612	4.43629644395724e-05	0.00113176512189715	2.45346599038129
HOXB13-AS1	231	45	0	A_33_P3308456	NM_001282275	HOXB13-AS1	1.36998546377098	7.4040879086086	5.13777014522933	0.000467042832996681	0.00436309197416583	0.0396364006423449
LOC100128338	69	89	0	A_33_P3390950	ENST00000534398	LOC100128338	1.37136987027401	7.61161199565454	6.29468688587678	9.76570306301271e-05	0.00172571573488917	1.64727501401029
ATF5	72	57	0	A_23_P119337	NM_012068	ATF5	1.3729812600302	10.7203513608719	4.69570811257555	0.000892707318433469	0.00660647949085278	-0.626672189561708
KRTAP1-3	32	96	0	A_33_P3213006	NM_001257305	KRTAP1-3	1.37393821833103	12.3356834334349	7.90130472843392	1.47379996282512e-05	0.000682000932797326	3.57039353218868
NFKBIB	287	80	0	A_23_P330895	NR_040515	NFKBIB	1.37400286755127	7.5341359277868	5.97675564212037	0.000147418064762547	0.00214798962953004	1.22502646590362
XLOC_006980	33	27	0	A_21_P0005621	NR_125426	XLOC_006980	1.37429228157348	7.49722024082407	7.44426778299817	2.44885440809741e-05	0.000874208063440477	3.05726029792824
RRP1	84	152	0	A_23_P80136	NM_003683	RRP1	1.37566382784627	8.03206587678884	7.96186237125151	1.38018975965468e-05	0.000663044323644574	3.63649304928745
MOP-1	326	111	0	A_24_P419028	AB014771	MOP-1	1.37710088463835	6.10097829947711	5.06073997794256	0.000521800366526966	0.0047065680367774	-0.0744193613860089
PPRC1	346	110	0	A_23_P127079	NM_015062	PPRC1	1.37725416441761	11.5354154193211	6.79983867236342	5.21407162044124e-05	0.00125008938128824	2.28878239808063
KCNG1	264	91	0	A_33_P3362296	XM_006723786	KCNG1	1.37746592214584	8.8591710839744	6.27860368254577	9.96809294853938e-05	0.00174431155913569	1.62626299311876
DMPK	44	44	0	A_23_P50535	NM_004409	DMPK	1.37776342000634	10.7659993235989	8.92834188416843	5.08454369443158e-06	0.000496112025389884	4.63528504437488
XLOC_009862	242	65	0	A_21_P0007619	ENST00000547554	XLOC_009862	1.37877613411059	6.68874867282655	9.75965495568269	2.30267310011366e-06	0.000381905249015346	5.41658346499538
KBTBD13	292	149	0	A_33_P3306192	NM_001101362	KBTBD13	1.37960558431879	8.19209766474822	6.76262653409852	5.45483046358745e-05	0.00127271737665131	2.24272714477062
MTRNR2L10	69	10	0	A_21_P0000110	NM_001190708	MTRNR2L10	1.38152868735711	6.93172410659368	4.04464765829514	0.00243803586550722	0.0129844115995795	-1.65723798895324
LOC729080	108	160	0	A_24_P66932	NR_033244	LOC729080	1.38181639325984	7.81375634554763	6.37727954546996	8.79395775442301e-05	0.00163085777406847	1.75460032125027
ZNF703	376	69	0	A_33_P3385775	ENST00000331569	ZNF703	1.38258029585687	7.21584481036183	5.88718892903609	0.000165956375153273	0.00230388937806531	1.10342868646665
CDC42EP2	66	26	0	A_23_P1602	NM_006779	CDC42EP2	1.38271006348885	9.49529625067228	4.51612240244333	0.00117081449745068	0.00790299785779208	-0.905327968975489
KRI1	381	24	0	A_23_P101332	NM_023008	KRI1	1.38574962031262	10.3626378481672	6.42561125006823	8.27416930278392e-05	0.00158154288072969	1.81695786213774
LOC100652950	198	155	0	A_21_P0014801	ENST00000567298	LOC100652950	1.38841320986253	9.03910161189704	5.97630339060181	0.000147505860866941	0.00214798962953004	1.22441541817797
NLRC4	78	69	0	A_23_P119835	NM_021209	NLRC4	1.38868805464256	5.60693574718363	8.60323663950271	7.04445844227615e-06	0.00055146019216221	4.310737811117
TREM1	205	1	0	A_23_P19333	NM_018643	TREM1	1.38979226676681	6.54735028062679	4.84807843895064	0.000711791590908679	0.00568443725452909	-0.393811399848726
PRB3	206	143	0	A_23_P116890	NM_006249	PRB3	1.39074691178815	7.04096166516677	7.43556660716025	2.473186724381e-05	0.000874208063440477	3.04724115064712
NOL6	294	24	0	A_24_P21410	NM_022917	NOL6	1.39152660775072	8.21507148550459	7.15584590584862	3.41404600144492e-05	0.0010120034223856	2.72001828598362
SLC34A3	80	77	0	A_33_P3297468	NM_001177317	SLC34A3	1.39294222463059	6.56822331013734	7.53894291032318	2.20027352553873e-05	0.000847841933454762	3.1656629466092
RPTOR	355	86	0	A_23_P384499	NM_020761	RPTOR	1.39436762704233	11.0688893527946	3.96345639071824	0.00277468071040924	0.0142355562786813	-1.78945051638259
BCL11B	55	25	0	A_23_P205738	NM_138576	BCL11B	1.39471824969017	6.84988954677151	3.05412767595458	0.0124306596301851	0.0409875369061465	-3.30762383479712
NAGS	373	108	0	A_32_P32739	NM_153006	NAGS	1.39559269134642	11.0391291502643	4.67931985023061	0.000914901011498746	0.00671424491213992	-0.651914383769657
SFXN5	24	151	0	A_33_P3292896	NM_144579	SFXN5	1.39617766378318	9.03230568880302	3.87769716532949	0.00318380010904775	0.0156318673789055	-1.92988165311954
HAGHL	288	117	0	A_24_P356373	NM_032304	HAGHL	1.39633149884854	8.80201327207904	6.78649444416673	5.29905737362451e-05	0.0012578891543141	2.27228865304086
PSME1	67	49	0	A_23_P151614	NM_006263	PSME1	1.39661501463149	8.33767563012895	9.57546444569059	2.73102412047145e-06	0.000402712235892773	5.24923751194487
BATF3	141	44	0	A_23_P160720	NM_018664	BATF3	1.39698767500113	8.94735487867832	6.2267295878302	0.000106523442290627	0.00180342888731662	1.55824041833833
MTSS1	24	7	0	A_23_P347632	NM_014751	MTSS1	1.39707190150233	7.11733142962868	4.02414693867349	0.00251876986810639	0.0132575631067249	-1.69055163516119
FUZ	310	98	0	A_23_P373568	NM_025129	FUZ	1.39946811373107	6.03929885352342	5.79844787379055	0.000186822923663155	0.0024638762607351	0.981794044873756
DLG4	191	8	0	A_23_P411102	NM_001365	DLG4	1.40004467436431	6.36343554172973	7.65978210882354	1.92203719536222e-05	0.000779434155832742	3.30240745858017
XLOC_012831	355	58	0	A_21_P0009629	NR_110792	XLOC_012831	1.4003096364388	8.23523859780182	5.51083263732893	0.00027630055581183	0.00313121833963896	0.579591974021268
QRICH2	335	54	0	A_33_P3306442	ENST00000524722	QRICH2	1.4004745038286	6.21829029191248	3.71343195389741	0.00415396761542038	0.0187841874335744	-2.20093130941371
ATXN7L3	248	124	0	A_23_P421935	NM_020218	ATXN7L3	1.40082341220128	7.27746360655188	7.76338289597107	1.71382387836982e-05	0.000741749218548883	3.41822106581098
TRIB1	133	60	0	A_24_P252497	NM_025195	TRIB1	1.40139719907901	12.5959433233379	6.48324751832668	7.69732801664602e-05	0.00151751227726989	1.89089087222408
KRTAP10-10	9	111	0	A_24_P134789	NM_181688	KRTAP10-10	1.40197674345458	7.86704654147698	6.75161197361633	5.5283825826919e-05	0.00128395111643454	2.22905898557503
TUBA3C	253	157	0	A_23_P128598	NM_006001	TUBA3C	1.40286581635372	10.5584491946167	2.93964043411868	0.0150891094275179	0.0473293820007425	-3.50097437417756
SARS2	207	75	0	A_23_P90484	NM_017827	SARS2	1.40334056946828	7.64138169929309	8.08881012637651	1.20426928385047e-05	0.000636171317165948	3.77366185929111
HSPA6	53	102	0	A_23_P114903	NM_002155	HSPA6	1.40414393540165	8.68587165040407	7.62086908993996	2.00721699511943e-05	0.000799957605782169	3.25856890939749
NELF	303	160	0	A_23_P32064	NM_015537	NELF	1.40536575411847	7.43661002960376	3.23966386683735	0.0090958574836962	0.0326991561978625	-2.99432017153486
ZNF385A	71	44	0	A_24_P403734	NM_015481	ZNF385A	1.40583395529571	9.43479729495181	6.46820886461862	7.84352368217652e-05	0.00153723836495739	1.87164491717789
RAB20	225	90	0	A_24_P22050	NM_017817	RAB20	1.40978419829098	6.91152268422703	5.053597178268	0.000527214980629107	0.00471437163837912	-0.0850396869738894
ERAL1	202	44	0	A_23_P71981	NM_005702	ERAL1	1.40979293515412	9.65834968497709	9.27605187280506	3.62501751104782e-06	0.000457891131424127	4.97031673522309
XLOC_013489	7	96	0	A_21_P0009950	lnc-SSTR4-2:4	XLOC_013489	1.41116498814462	8.32424352736996	6.24204665073969	0.000104451731203217	0.00177920387537259	1.57836567498041
CDRT3	33	158	0	A_33_P3629131	BX484257	CDRT3	1.41285283396527	6.86600577878048	4.61941734383898	0.00100114982696477	0.0070910522820604	-0.744501087893201
PSMD3	4	110	0	A_24_P289726	NM_002809	PSMD3	1.41414162208573	10.1114895922692	3.11004988900673	0.0113109542604202	0.0383219823112345	-3.21314875345415
SNORA71A	184	17	0	A_33_P3495962	BM918074	SNORA71A	1.41531270003031	7.0934242110742	6.01691732124585	0.000139841563311992	0.00208001839572721	1.27917122224
TOR2A	21	127	0	A_33_P3275835	NM_001134430	TOR2A	1.41643898333975	9.84507675785036	6.33752069411381	9.24802063564536e-05	0.0016782437447627	1.70305622908355
XLOC_000480	352	19	0	A_21_P0000919	NR_125966	XLOC_000480	1.41806465215137	8.16173064865122	5.90266118939544	0.000162582431391059	0.00227601741558289	1.12451789796173
FKBP4	130	31	0	A_23_P128372	NM_002014	FKBP4	1.41826886342587	8.97331010312154	5.48391672031639	0.000286776119302555	0.00321018296827699	0.541326050876642
DNAH10	348	113	0	A_32_P228268	NM_207437	DNAH10	1.41839299089748	5.45966753619949	9.40839126164311	3.19562887630646e-06	0.000432655033355209	5.09466773672654
ZNF787	44	50	0	A_23_P78835	NM_001002836	ZNF787	1.41972232953651	9.0203955544951	10.8751674797979	8.65015347850479e-07	0.000271892276978135	6.36584716966262
ASL	198	105	0	A_23_P26223	NM_001024943	ASL	1.42158509940127	9.77002480467554	3.21893048259468	0.0094177721306265	0.0335226417775941	-3.02930062010787
LOC100506257	307	20	0	A_21_P0014885	AK295076	LOC100506257	1.42159021185887	7.5269104371986	7.69845100361969	1.84126980130811e-05	0.000763275191227982	3.34578745356995
PNPLA2	71	133	0	A_33_P3219870	NM_020376	PNPLA2	1.42205328255117	10.8573593459797	5.80182171402474	0.000185979921553564	0.0024571515868785	0.986439603094757
LOC100129722	165	37	0	A_33_P3409580	NR_038389	LOC100129722	1.42292581146176	10.5637907411017	6.00654853810219	0.000141756575517586	0.00209726713281302	1.26521479804896
CDH16	350	140	0	A_23_P100240	NM_004062	CDH16	1.42378550539209	6.037147939691	7.60773550631585	2.03688518352352e-05	0.00080593569762252	3.24373092522908
XLOC_011676	277	23	0	A_21_P0008917	ENST00000566108	XLOC_011676	1.42899890525849	9.02375112532662	5.96723854095318	0.000149277567595895	0.00216056906913989	1.21216140400825
DNAJB1	169	161	0	A_23_P90062	NM_006145	DNAJB1	1.42937991725333	10.8918846344355	4.90421480620792	0.000655363269626266	0.00541283922097371	-0.308861732824875
STK40	113	134	0	A_23_P74229	NM_032017	STK40	1.42967126914306	12.6368760991124	3.67681139351296	0.00440967150156856	0.0195895246785682	-2.26169773069552
LCN2	104	136	0	A_23_P169437	NM_005564	LCN2	1.4300670440547	5.71875394959463	8.1990435722976	1.07121689806601e-05	0.000602869618347634	3.89125667173092
EPC2	350	65	0	A_23_P359738	NM_015630	EPC2	1.43066660483174	8.39567703965219	6.97243097040409	4.23840244102609e-05	0.00111368369503239	2.49994870223693
LOC100130557	139	31	0	A_33_P3404671	NR_024567	LOC100130557	1.43207968789054	8.4173976246067	6.76552305724905	5.43566474094279e-05	0.00127104212876194	2.24631874954117
RNF31	159	128	0	A_23_P99632	NM_017999	RNF31	1.43326832454689	9.95936396599865	10.2944043103512	1.42408617214947e-06	0.000318741857874705	5.88495589958785
DEGS2	237	23	0	A_33_P3290174	NM_206918	DEGS2	1.43425560869008	7.89371220244072	8.0203261106347	1.29592457414206e-05	0.000658166010182995	3.69989759827303
SLX1A	204	69	0	A_23_P501451	NM_001014999	SLX1A	1.43489226968722	10.1104334434479	5.30725653740602	0.000367044950173966	0.00375359228050835	0.287502369716453
HOXC9	294	28	0	A_23_P25150	NM_006897	HOXC9	1.43598827215069	6.5216847883064	4.91459337993148	0.000645463736851386	0.00537101917692669	-0.293206139627596
GZMM	312	55	0	A_23_P130836	NM_005317	GZMM	1.43647380549317	6.60193014891078	9.7791074004872	2.26190864652827e-06	0.000381905249015346	5.43407270856222
ENTPD1	43	107	0	A_33_P3262580	ENST00000371206	ENTPD1	1.43819041490391	7.82195987029671	6.17738609425702	0.000113504682899787	0.00185784887243341	1.49317909719164
NLE1	53	85	0	A_33_P3361513	NM_001014445	NLE1	1.43847772888437	9.05453809754803	7.49940154938956	2.30059227216234e-05	0.000851679259154499	3.12052441978772
XLOC_003863	103	3	0	A_21_P0003887	lnc-STX18-1:1	XLOC_003863	1.44418300883535	7.60007538527932	6.87963570328797	4.7357006055377e-05	0.00117398863672102	2.38691092982316
XLOC_001320	230	45	0	A_21_P0001811	lnc-TRAPPC12-3:1	XLOC_001320	1.44476812855337	9.45731962678955	5.00492545940609	0.000565747505859186	0.00493220812563302	-0.157606966047699
LOC646513	41	14	0	A_24_P933794	ENST00000366413	LOC646513	1.44515717204411	8.56214483360089	7.93966988690859	1.41372192884199e-05	0.000667172623585799	3.61231991591414
CD3EAP	360	116	0	A_23_P208310	NM_012099	CD3EAP	1.4454255043723	9.29337285497922	5.75356428884865	0.000198437638834354	0.00256261443824923	0.919832964325174
IL32	167	37	0	A_23_P15146	NM_001012631	IL32	1.44782033261561	7.85908831943493	11.329150445905	5.95099757882869e-07	0.000271179056885254	6.72297150998745
SEPT9	24	96	0	A_23_P106973	NM_006640	SEPT9	1.44816135806247	12.6556064530176	5.07314965887006	0.00051253402135243	0.00465556393768273	-0.0559857667065753
NAMPT	234	52	0	A_33_P3375934	NM_005746	NAMPT	1.44954517546982	10.4124165169867	3.5440602317727	0.00548279080001152	0.0229397966450575	-2.48289662345439
MAST1	306	99	0	A_23_P101480	NM_014975	MAST1	1.44961804456622	7.32373279967053	3.9299630999154	0.00292747636477732	0.0147471511221123	-1.84420294318529
XLOC_013994	121	49	0	A_21_P0010267	lnc-TPTE-3:3	XLOC_013994	1.4501140903442	11.2570232261612	3.3296595830566	0.0078245504585404	0.0292525103430935	-2.84264759742338
LOC404266	172	131	0	A_21_P0000588	NR_110331	LOC404266	1.45115811870842	6.8999004767218	7.38329836435995	2.62499102724859e-05	0.000905377340019343	2.98685493981577
TM4SF19	29	7	0	A_21_P0000160	NM_138461	TM4SF19	1.45197476109203	9.08604244501029	4.06095959347783	0.00237574425720951	0.0127669430905978	-1.63076548235709
XLOC_005586	1	111	0	A_21_P0004992	lnc-C6orf146-2:1	XLOC_005586	1.45255019394366	9.72934754457127	5.46049855430225	0.000296237535546098	0.00328344717542412	0.507945374704911
LINC00315	31	1	0	A_24_P100190	ENST00000441947	LINC00315	1.4527135312441	6.20577870671704	4.14026510282014	0.0020958951411089	0.0117195637478037	-1.50250428061668
MBD3	236	97	0	A_23_P50839	NM_001281453	MBD3	1.45378528278947	10.6623577804683	5.39335316910824	0.000325271676549047	0.0034887078977718	0.411783856822631
SH2D2A	274	161	0	A_23_P160618	NM_003975	SH2D2A	1.4539826081695	6.94542923195352	11.1079200495163	7.12897961316289e-07	0.000271179056885254	6.5509277872607
CDK16	99	92	0	A_33_P3341239	NM_006201	CDK16	1.45428872376867	12.9802627765605	3.88234864831115	0.00316006202052914	0.0155749920710044	-1.92224501048217
POLRMT	59	85	0	A_23_P131096	NM_005035	POLRMT	1.45509952219822	11.9854978413285	7.21175107253554	3.19872484274548e-05	0.000979550683001782	2.78622080825195
CCDC129	8	144	0	A_33_P3323607	ENST00000409717	CCDC129	1.45579191336604	7.04177545205049	6.54964298442249	7.08619106259923e-05	0.00147414478196221	1.97548401598888
CST5	19	155	0	A_23_P170453	NM_001900	CST5	1.45614899015509	9.41447536745814	6.50601869100249	7.48154083298637e-05	0.00151072713620267	1.91997244519597
XLOC_l2_003758	233	83	0	A_21_P0011149	TCONS_l2_00006892	XLOC_l2_003758	1.45748722164241	7.86762087412965	7.52331897721721	2.23933279740738e-05	0.000847841933454762	3.14785067698882
DDX10	205	3	0	A_23_P32938	NM_004398	DDX10	1.45816670372432	11.4899046302278	7.72078625940942	1.79630487828581e-05	0.000763275191227982	3.37076085082777
KCNK15	30	141	0	A_23_P109026	NM_022358	KCNK15	1.45946502860612	10.3029877325788	5.36414718583846	0.00033884031253623	0.00357239783787496	0.369747976089079
LY9	111	153	0	A_33_P3368830	NM_001033667	LY9	1.46202643993528	7.4025311230469	6.52768793237202	7.28225957467718e-05	0.00149322567989369	1.94757951485238
KIRREL2	163	132	0	A_33_P3420852	NM_199180	KIRREL2	1.46236252796335	8.42471774051362	8.93310659746947	5.06066423589661e-06	0.000496112025389884	4.63995915043971
ZC3H7B	208	14	0	A_23_P218807	NM_017590	ZC3H7B	1.4625427027512	6.50495167692951	7.41303640313231	2.53741980089085e-05	0.000884327959477839	3.02125398644162
VILL	273	99	0	A_23_P29684	NM_015873	VILL	1.46277071384315	8.04698264171342	8.19740345524786	1.07307500761159e-05	0.000602869618347634	3.88951723466839
XLOC_002217	4	79	0	A_21_P0002073	ENST00000422600	XLOC_002217	1.46371529426644	9.65876318588083	6.38385245223932	8.7212408848534e-05	0.0016215083917497	1.76310003178707
LINC00277	126	79	0	A_19_P00322896	NR_026949	LINC00277	1.4645834774962	8.66967264728558	6.08002516980702	0.000128771418128327	0.00198613534640147	1.36377835032931
DPEP3	381	8	0	A_23_P129413	NM_022357	DPEP3	1.46467681654257	7.18180338703068	6.08277830160505	0.000128310500427113	0.00198470253167621	1.36745627795785
C2orf18	301	84	0	A_24_P913339	NM_017877	C2orf18	1.46496390799628	7.60692278142914	3.52731694625087	0.0056362685076381	0.0234172140596386	-2.51088932460663
MMP28	372	24	0	A_24_P196592	NM_001032278	MMP28	1.46604029355027	6.77099083663462	7.35375527613547	2.71524683315161e-05	0.000919375955151882	2.95257049451265
LOC647086	209	72	0	A_33_P3262694	THC2659533	LOC647086	1.46794902989285	8.72932885028763	7.13040530935167	3.51719374901193e-05	0.00103338502054303	2.68975718244722
C20orf134	178	156	0	A_33_P3364989	NM_001024675	C20orf134	1.46840397829147	7.79974791278837	3.57197336932983	0.00523650669836574	0.0222210413092402	-2.43627366974478
XLOC_011645	70	144	0	A_21_P0009093	ENST00000572466	XLOC_011645	1.46878659685103	7.4828239197591	8.73970168842961	6.1362530773164e-06	0.000531642970705386	4.44833053922136
LIME1	365	31	0	A_23_P376088	NM_017806	LIME1	1.4702920657319	7.32382362780741	9.53802022729239	2.82834093279635e-06	0.000402712235892773	5.21482742373615
SHISA7	54	79	0	A_24_P161581	NM_001145176	SHISA7	1.47159778889642	6.38787779303558	4.92331843049227	0.000637264846216055	0.00533728151597099	-0.280056917931955
C19orf66	218	32	0	A_33_P3641714	NM_018381	C19orf66	1.47308065500096	10.2771003769558	9.01291320501836	4.6783547328303e-06	0.000496112025389884	4.71790068444391
XLOC_009370	256	103	0	A_21_P0007316	lnc-DENND5A-1:1	XLOC_009370	1.47350846096344	7.01419619111085	6.84771292903218	4.92111213754138e-05	0.00119680010363944	2.34775769599737
PRH2	50	129	0	A_23_P99076	NM_005042	PRH2	1.47377197584107	9.39056222877756	5.8950977019336	0.000164222431238156	0.00228925146629477	1.1142129853954
LOC100129974	103	23	0	A_33_P3297030	ENST00000570359	LOC100129974	1.47424203106487	7.53724326347359	6.70054474118908	5.88371172262573e-05	0.00133719991251326	2.16547261146049
LOC390660	58	145	0	A_33_P3261828	NR_045529	LOC390660	1.47809510926003	8.44403238494014	7.30437616210283	2.87371465877516e-05	0.000938690441186968	2.89501866810873
KLRG2	77	84	0	A_33_P3306207	NM_198508	KLRG2	1.47817461207253	8.1803069049086	4.91314355149413	0.000646837005349354	0.00537975919726155	-0.295392197892739
XLOC_007275	165	73	0	A_21_P0006340	ENST00000412339	XLOC_007275	1.47852050698801	5.77807369022311	7.20036373476745	3.24135877668977e-05	0.000985361238337133	2.7727688609457
BMP2	336	121	0	A_33_P3237150	NM_001200	BMP2	1.47983071858178	9.14613047302936	6.06372056488226	0.000131537928616808	0.00200667614727785	1.34197444404831
SLC2A14	266	83	0	A_32_P47754	NM_001286233	SLC2A14	1.47989236288901	12.1548836265282	3.85526323814443	0.00330094117973483	0.0160311926890827	-1.96674396951738
C16orf59	357	35	0	A_23_P26557	NM_025108	C16orf59	1.48095398811387	9.27004218049175	3.23459067455146	0.00917356537642324	0.0328791793472106	-3.00287832382236
XLOC_l2_006939	75	15	0	A_21_P0011724	NM_001302493	XLOC_l2_006939	1.48176471509925	7.31157545048807	3.38034919135066	0.00719064581270572	0.027639347547858	-2.75736513900793
XLOC_011532	314	43	0	A_21_P0008758	lnc-MAN2C1-3:1	XLOC_011532	1.48510678911971	6.93357969894158	8.50558429887632	7.78402901183192e-06	0.000571219561299982	4.21104574827477
KHNYN	325	100	0	A_24_P170763	NM_015299	KHNYN	1.48574913372051	10.4030020184631	8.17338372052387	1.10069309586713e-05	0.000613259073045168	3.86400775639578
LOC100287633	126	109	0	A_21_P0013934	AA778499	LOC100287633	1.4868037987312	7.04597020884282	7.95859378711493	1.38507368166344e-05	0.000663044323644574	3.63293639175509
XLOC_008604	334	89	0	A_21_P0007075	XR_424174	XLOC_008604	1.4883235009271	7.74706069721068	6.02494854046071	0.000138377445259698	0.00206376889935659	1.28997054559933
ZNF48	289	55	0	A_23_P415643	NM_152652	ZNF48	1.49068321539171	7.70800695411789	3.14929443807196	0.0105872575543503	0.0364482586480518	-3.14686109553443
OR10H2	113	114	0	A_23_P50799	NM_013939	OR10H2	1.4915416820417	7.17345645081956	7.09033979710361	3.68655502731779e-05	0.00105199769531653	2.64192860990988
TRMT1	216	73	0	A_23_P16683	NM_017722	TRMT1	1.49861860134686	11.2261113641952	7.52392925500094	2.23779306739137e-05	0.000847841933454762	3.14854700203841
LOC100130654	119	154	0	A_33_P3253460	AK095243	LOC100130654	1.49876223282275	9.06612091241194	7.48570200369891	2.33649897005152e-05	0.000859243627860667	3.10484019195879
ARID3B	115	62	0	A_23_P88580	NM_006465	ARID3B	1.50000092181801	8.7552365735222	8.93250297872291	5.06368263202279e-06	0.000496112025389884	4.63936714006161
RLTPR	7	82	0	A_33_P3294222	NM_001013838	RLTPR	1.50040856317921	9.68246339093334	8.10322508816894	1.18589037562403e-05	0.000631174050080536	3.78911893224706
ZNF628	79	30	0	A_32_P409222	NM_033113	ZNF628	1.50206048732482	8.74488471779764	7.27843939859269	2.96094964840891e-05	0.00094677756173598	2.86466434386256
SH3GL1P1	325	63	0	A_33_P3545065	NR_033412	SH3GL1P1	1.5021416304552	10.1798660289322	7.99648597070715	1.3295901482573e-05	0.000659116797872813	3.6740910801685
PLD6	248	126	0	A_23_P360626	NM_178836	PLD6	1.50217693528846	8.30785507846204	4.33557750016154	0.00154489007752321	0.00952491628477393	-1.18990294464714
XLOC_003052	136	70	0	A_21_P0003278	lnc-WNT7A-1:1	XLOC_003052	1.50388018068033	8.33432938030588	7.06364370026264	3.80430161483835e-05	0.00105802772289803	2.6099430805196
SIX5	1	143	0	A_33_P3412975	NM_175875	SIX5	1.50512849915153	11.8819667391879	6.26705327649595	0.000101162353925345	0.00175365624770272	1.61115015310162
KRT73	375	67	0	A_33_P3315303	NM_175068	KRT73	1.50661004247164	9.43762148853671	8.35044713778414	9.13885255729615e-06	0.00057790428541351	4.05051615492482
XLOC_l2_001760	68	79	0	A_21_P0010844	TCONS_l2_00003281	XLOC_l2_001760	1.50811826850544	7.67963019123061	6.797389886511	5.2295560109057e-05	0.00125008938128824	2.28575745590801
ZNF259P1	310	122	0	A_24_P213206	ENST00000407656	ZNF259P1	1.51052499950475	7.53195915769153	7.07685026522772	3.74555058126848e-05	0.00105222811354725	2.62577802993571
XLOC_005355	154	145	0	A_21_P0005117	ENST00000607287	XLOC_005355	1.51332354840917	7.32672877538706	8.21269138228471	1.05589028169229e-05	0.000602869618347634	3.90571905606351
XLOC_009147	166	1	0	A_21_P0007437	NR_110189	XLOC_009147	1.51650436285252	8.83732064364972	6.97915853705174	4.20461644993297e-05	0.00111329643731151	2.508099184449
TBC1D3	4	4	0	A_33_P3344991	AK122833	TBC1D3	1.5172041590696	7.70352042442497	6.03865378456741	0.000135916958770961	0.00204155657416897	1.30837793216463
HOXA9	16	120	0	A_33_P3416231	NM_152739	HOXA9	1.51747626682155	7.81624888178709	4.43633116496753	0.00132268710190594	0.00862750369250238	-1.03055853302558
SLC16A3	235	143	0	A_23_P158725	NM_001042422	SLC16A3	1.51857115139608	11.765710392093	3.94541668887421	0.00285590814882655	0.0145139029442653	-1.81892548463609
SNORA10	169	7	0	A_21_P0000237	NR_002327	SNORA10	1.51906929467776	8.71772368672572	7.03617533244185	3.92972404093816e-05	0.0010749634285384	2.57693439332672
DAPK3	245	95	0	A_33_P3224045	NM_001348	DAPK3	1.52033743220878	12.4592974008856	8.35653514439277	9.08109106675694e-06	0.00057790428541351	4.05686612127796
XLOC_007858	158	57	0	A_21_P0006395	lnc-PTGES2-1:6	XLOC_007858	1.52052055778777	9.07926956254963	6.78040130981518	5.33836072073267e-05	0.00126101809206418	2.26474937958469
IL36B	135	13	0	A_23_P90925	NM_173178	IL36B	1.52208265524536	8.40603848240553	3.12062608318825	0.0111110732049457	0.0378371562798836	-3.19528299728845
LOC100507558	192	151	0	A_21_P0014192	A_21_P0014192	LOC100507558	1.52263842165851	7.50939869516036	7.25212212153865	3.05241022367187e-05	0.000959435885210371	2.83377649460751
NYX	51	37	0	A_23_P137046	NM_022567	NYX	1.52276713767741	8.28355600329091	6.4226164802128	8.30539248479346e-05	0.0015819898870969	1.81310357201421
GFRA1	115	103	0	A_33_P3293336	NM_005264	GFRA1	1.5250245207369	7.60817466556965	6.9294056447465	4.46155867265929e-05	0.00113310124425981	2.4476808183683
FTMT	145	154	0	A_32_P160896	NM_177478	FTMT	1.5266267926637	6.71390149017656	6.28434644658406	9.89531119860616e-05	0.00173888174322342	1.63376989610118
[truncated: 399 more rows]

## Sheet: Overlapped genes
List of overlapped genes at both Fluoride concentrations and the logFC level. Genes were grouped according to the expression regulation on both concentration.
[truncated: 173 more rows]
