# Supplementary material for: Unraveling molecular characteristic of fluoride neurotoxicity on U87 glial-like cells: insights from transcriptomic and proteomic approach
Source: Front Cell Neurosci. 2023 Jun 9;17:1153198. doi: 10.3389/fncel.2023.1153198 (PMC10289037; doi:10.3389/fncel.2023.1153198)
Supplement: Supplementary file 2 [file Table_2.XLSX]

## Sheet: 0.095 x control - DOWN - Supple
Supplementary Table 2: Gene Ontology analysis of DEG’s up- and down-regulated on U87-glial-like cells over 10 days of Fluoride exposure. Group comparison is given on separated sheets. The “GO ID” gives the identification number and “term” displays the full name of the corresponding GO term. “Ontology” column shows the term classification on the main three biological classes. The total number of d…
GO ID	Term	Ontology	Number of DE	Adj. P-value
GO:0043226	organelle	CC	49	0.00115165120021147
GO:0043227	membrane-bounded organelle	CC	47	0.000683547546612815
GO:0044238	primary metabolic process	BP	42	0.00167206107995602
GO:0012505	endomembrane system	CC	27	9.81074122556459e-06
GO:0043412	macromolecule modification	BP	23	0.000659807940183226
GO:0042221	response to chemical	BP	23	0.0024752135127884
GO:0006464	cellular protein modification process	BP	22	0.000861634425636663
GO:0036211	protein modification process	BP	22	0.000861634425636663
GO:0005576	extracellular region	CC	22	0.00323672282991615
GO:0070887	cellular response to chemical stimulus	BP	20	0.000258774101336289
GO:0031982	vesicle	CC	20	0.00234144006231441
GO:0051246	regulation of protein metabolic process	BP	18	0.000560454353716203
GO:0006793	phosphorus metabolic process	BP	18	0.00261967094312109
GO:0032268	regulation of cellular protein metabolic process	BP	16	0.00167125149835419
GO:0071310	cellular response to organic substance	BP	16	0.00186509714859666
GO:0019220	regulation of phosphate metabolic process	BP	15	7.60372709645922e-05
GO:0051174	regulation of phosphorus metabolic process	BP	15	7.6997891633409e-05
GO:0031399	regulation of protein modification process	BP	15	0.000104131545376788
GO:0032270	positive regulation of cellular protein metabolic process	BP	13	0.000321702642205086
GO:0051247	positive regulation of protein metabolic process	BP	13	0.00058077368615608
GO:0031401	positive regulation of protein modification process	BP	12	0.000104282549522827
GO:0071495	cellular response to endogenous stimulus	BP	12	0.000316047478833087
GO:0009719	response to endogenous stimulus	BP	12	0.00148398045801931
GO:1901701	cellular response to oxygen-containing compound	BP	11	0.000215844947546787
GO:0045937	positive regulation of phosphate metabolic process	BP	11	0.000224231311908536
GO:0010562	positive regulation of phosphorus metabolic process	BP	11	0.000224231311908536
GO:0001932	regulation of protein phosphorylation	BP	11	0.00180092480683195
GO:0001934	positive regulation of protein phosphorylation	BP	10	0.000385396340592925
GO:0042327	positive regulation of phosphorylation	BP	10	0.000566141731675428
GO:0044432	endoplasmic reticulum part	CC	10	0.00348585865617437
GO:1901698	response to nitrogen compound	BP	9	0.0026014366299217
GO:0062023	collagen-containing extracellular matrix	CC	8	1.3723452528739e-05
GO:0031012	extracellular matrix	CC	8	8.60232261184227e-05
GO:0001503	ossification	BP	7	0.000101163410373213
GO:1901699	cellular response to nitrogen compound	BP	7	0.00185195787484383
GO:0030155	regulation of cell adhesion	BP	7	0.00265825836853828
GO:0030335	positive regulation of cell migration	BP	6	0.00359479602105277
GO:0048771	tissue remodeling	BP	5	0.000128192643058939
GO:0030278	regulation of ossification	BP	5	0.000230370700810238
GO:0005996	monosaccharide metabolic process	BP	5	0.00119842068825672
GO:0005788	endoplasmic reticulum lumen	CC	5	0.0015384480243615
GO:0030199	collagen fibril organization	BP	4	1.42983390578348e-05
GO:0046849	bone remodeling	BP	4	0.000107396858773873
GO:0030282	bone mineralization	BP	4	0.000267170607142504
GO:0008194	UDP-glycosyltransferase activity	MF	4	0.000773236860076245
GO:0031214	biomineral tissue development	BP	4	0.00102784595638079
GO:0005201	extracellular matrix structural constituent	MF	4	0.00102784595638079
GO:0071466	cellular response to xenobiotic stimulus	BP	4	0.00148221438039658
GO:0030595	leukocyte chemotaxis	BP	4	0.00327508422410498
GO:0045124	regulation of bone resorption	BP	3	0.000177871630283329
GO:0046850	regulation of bone remodeling	BP	3	0.000306600092072609
GO:0045453	bone resorption	BP	3	0.000652521594620723
GO:0030500	regulation of bone mineralization	BP	3	0.00118056851516991
GO:0002690	positive regulation of leukocyte chemotaxis	BP	3	0.00174264972734395
GO:0034103	regulation of tissue remodeling	BP	3	0.00180068174920572
GO:0071674	mononuclear cell migration	BP	3	0.00192034053304502
GO:0045778	positive regulation of ossification	BP	3	0.00192034053304502
GO:0070167	regulation of biomineral tissue development	BP	3	0.00217428076967101
GO:0001523	retinoid metabolic process	BP	3	0.00289753274301933
GO:0016101	diterpenoid metabolic process	BP	3	0.00339460241647339
GO:0043200	response to amino acid	BP	3	0.00366151426370939
GO:0002688	regulation of leukocyte chemotaxis	BP	3	0.00375325328145445
GO:0052696	flavonoid glucuronidation	BP	2	0.000260934341798818
GO:0098643	banded collagen fibril	CC	2	0.000397251756008315
GO:0005583	fibrillar collagen trimer	CC	2	0.000397251756008315
GO:0033629	negative regulation of cell adhesion mediated by integrin	BP	2	0.000397251756008315
GO:0052697	xenobiotic glucuronidation	BP	2	0.000397251756008315
GO:0045779	negative regulation of bone resorption	BP	2	0.000561400375563637
GO:0031089	platelet dense granule lumen	CC	2	0.000653818462660866
GO:0009812	flavonoid metabolic process	BP	2	0.000753083131318888
GO:0046851	negative regulation of bone remodeling	BP	2	0.000753083131318888
GO:0033151	V(D)J recombination	BP	2	0.000753083131318888
GO:2000811	negative regulation of anoikis	BP	2	0.000972005268181306
GO:2000647	negative regulation of stem cell proliferation	BP	2	0.00109158962244739
GO:0052695	cellular glucuronidation	BP	2	0.00121787432942327
GO:0098644	complex of collagen trimers	CC	2	0.00121787432942327
GO:0034104	negative regulation of tissue remodeling	BP	2	0.00135082318857977
GO:0005385	zinc ion transmembrane transporter activity	MF	2	0.00135082318857977
GO:0042827	platelet dense granule	CC	2	0.00149040014109208
GO:0071577	zinc ion transmembrane transport	BP	2	0.00163656926935785
GO:0071305	cellular response to vitamin D	BP	2	0.0017892947965168
GO:0072509	divalent inorganic cation transmembrane transporter activity	MF	2	0.00194854108597186
GO:0019585	glucuronate metabolic process	BP	2	0.00194854108597186
GO:2000209	regulation of anoikis	BP	2	0.00194854108597186
GO:0006063	uronic acid metabolic process	BP	2	0.00194854108597186
GO:0006829	zinc ion transport	BP	2	0.00246505025607596
GO:0045939	negative regulation of steroid metabolic process	BP	2	0.00303897673465604
GO:0006517	protein deglycosylation	BP	2	0.00303897673465604
GO:0071295	cellular response to vitamin	BP	2	0.00345302836275604
GO:0015020	glucuronosyltransferase activity	MF	2	0.00366938077430225
GO:0035921	desmosome disassembly	BP	1	0.0027333073018353
GO:0036143	kringle domain binding	MF	1	0.0027333073018353
GO:1900387	negative regulation of cell-cell adhesion by negative regulation of transcription from RNA polymerase II promoter	BP	1	0.0027333073018353
GO:2001229	negative regulation of response to gamma radiation	BP	1	0.0027333073018353
GO:1905513	negative regulation of short-term synaptic potentiation	BP	1	0.0027333073018353
GO:0032072	regulation of restriction endodeoxyribonuclease activity	BP	1	0.0027333073018353
GO:1905512	regulation of short-term synaptic potentiation	BP	1	0.0027333073018353
GO:1904391	response to ciliary neurotrophic factor	BP	1	0.0027333073018353
GO:1904373	response to kainic acid	BP	1	0.0027333073018353
GO:1904389	rod bipolar cell differentiation	BP	1	0.0027333073018353

## Sheet: 0.095 x control - UP - Suppleme
Supplementary Table 2: Gene Ontology analysis of DEG’s up- and down-regulated on U87-glial-like cells over 10 days of Fluoride exposure. Group comparison is given on separated sheets. The “GO ID” gives the identification number and “term” displays the full name of the corresponding GO term. “Ontology” column shows the term classification on the main three biological classes. The total number of d…
GO ID	Term	Ontology	Number of DE	Adj. P-value
GO:0032502	developmental process	BP	44	0.000189755283789942
GO:0048856	anatomical structure development	BP	43	7.87275935085741e-05
GO:0007275	multicellular organism development	BP	38	0.000649955495847838
GO:0048731	system development	BP	34	0.0015590271238637
GO:0048583	regulation of response to stimulus	BP	31	0.00166246639183946
GO:0048513	animal organ development	BP	30	0.000128757173133233
GO:0010646	regulation of cell communication	BP	26	0.00312877886167205
GO:0009966	regulation of signal transduction	BP	24	0.00316707278248109
GO:0008219	cell death	BP	21	0.000486026545150413
GO:0012501	programmed cell death	BP	21	0.000214398784271642
GO:0006915	apoptotic process	BP	20	0.000237498578853316
GO:0010941	regulation of cell death	BP	18	0.000360505440305647
GO:0043067	regulation of programmed cell death	BP	18	0.00014553030469928
GO:0042981	regulation of apoptotic process	BP	18	0.000118558939115061
GO:0034097	response to cytokine	BP	14	0.000623393329302409
GO:0045944	positive regulation of transcription by RNA polymerase II	BP	13	0.00183561510880808
GO:0071345	cellular response to cytokine stimulus	BP	12	0.00291484583380442
GO:0023014	signal transduction by protein phosphorylation	BP	11	0.00286625821108188
GO:0000165	MAPK cascade	BP	11	0.00262531773766808
GO:0001067	regulatory region nucleic acid binding	MF	11	0.00256254759974036
GO:0044212	transcription regulatory region DNA binding	MF	11	0.00254189761279283
GO:0019221	cytokine-mediated signaling pathway	BP	11	0.000607983068285563
GO:0000976	transcription regulatory region sequence-specific DNA binding	MF	10	0.00316721924628901
GO:0001012	RNA polymerase II regulatory region DNA binding	MF	10	0.00212863448915465
GO:0000977	RNA polymerase II regulatory region sequence-specific DNA binding	MF	10	0.00201399928550783
GO:0043408	regulation of MAPK cascade	BP	10	0.00166747527223389
GO:0031400	negative regulation of protein modification process	BP	10	0.000315777836754992
GO:0009617	response to bacterium	BP	9	0.00308115900614615
GO:0050865	regulation of cell activation	BP	9	0.00128000565573696
GO:0010563	negative regulation of phosphorus metabolic process	BP	9	0.000935546621409174
GO:0045936	negative regulation of phosphate metabolic process	BP	9	0.000924414543416744
GO:0000987	proximal promoter sequence-specific DNA binding	MF	8	0.00277417375613479
GO:0000978	RNA polymerase II proximal promoter sequence-specific DNA binding	MF	8	0.00234729486768376
GO:0030545	receptor regulator activity	MF	8	0.00199725461566463
GO:0042326	negative regulation of phosphorylation	BP	8	0.000908646261439854
GO:0001933	negative regulation of protein phosphorylation	BP	8	0.000515727446847776
GO:0001228	DNA-binding transcription activator activity, RNA polymerase II-specific	MF	7	0.00282608570377896
GO:0002237	response to molecule of bacterial origin	BP	7	0.000689422501810251
GO:0032496	response to lipopolysaccharide	BP	7	0.00054879462758395
GO:0070371	ERK1 and ERK2 cascade	BP	7	0.000432048084288084
GO:0070372	regulation of ERK1 and ERK2 cascade	BP	7	0.000310285994278384
GO:0005126	cytokine receptor binding	MF	7	0.000232237375604341
GO:0051348	negative regulation of transferase activity	BP	6	0.00143492732496611
GO:0072593	reactive oxygen species metabolic process	BP	6	0.00140950434970648
GO:0033673	negative regulation of kinase activity	BP	6	0.000843765941199404
GO:0006469	negative regulation of protein kinase activity	BP	6	0.000528660905903654
GO:0005125	cytokine activity	MF	6	0.00037290682884914
GO:0097529	myeloid leukocyte migration	BP	6	0.000290913363355725
GO:0043409	negative regulation of MAPK cascade	BP	6	0.000142378442332904
GO:0032611	interleukin-1 beta production	BP	5	7.4653237349662e-05
GO:0030595	leukocyte chemotaxis	BP	5	0.00280474573310706
GO:0071219	cellular response to molecule of bacterial origin	BP	5	0.00221109126215159
GO:0070555	response to interleukin-1	BP	5	0.00199308656991572
GO:0071222	cellular response to lipopolysaccharide	BP	5	0.0019104532522709
GO:2000377	regulation of reactive oxygen species metabolic process	BP	5	0.00153442454762006
GO:0071347	cellular response to interleukin-1	BP	5	0.00105014593031882
GO:0032612	interleukin-1 production	BP	5	0.000137998919974897
GO:0005178	integrin binding	MF	4	0.00252772151600064
GO:0042107	cytokine metabolic process	BP	4	0.00201415352174084
GO:0042089	cytokine biosynthetic process	BP	4	0.00195551681677678
GO:0071621	granulocyte chemotaxis	BP	4	0.00195551681677678
GO:1903409	reactive oxygen species biosynthetic process	BP	4	0.00189807333686019
GO:1990266	neutrophil migration	BP	4	0.0016799764796715
GO:0030593	neutrophil chemotaxis	BP	4	0.00105349193454615
GO:0032652	regulation of interleukin-1 production	BP	4	0.00101627314611845
GO:1903426	regulation of reactive oxygen species biosynthetic process	BP	4	0.000944626095269399
GO:0032651	regulation of interleukin-1 beta production	BP	4	0.000612722281622241
GO:0032602	chemokine production	BP	4	0.00058740055250368
GO:0032642	regulation of chemokine production	BP	4	0.000430494231571941
GO:0043407	negative regulation of MAP kinase activity	BP	4	0.000355693798861851
GO:0070373	negative regulation of ERK1 and ERK2 cascade	BP	4	0.000290689050839893
GO:0010713	negative regulation of collagen metabolic process	BP	3	5.96313888673431e-05
GO:0150078	positive regulation of neuroinflammatory response	BP	3	5.96313888673431e-05
GO:0032966	negative regulation of collagen biosynthetic process	BP	3	4.98475815635596e-05
GO:0042033	chemokine biosynthetic process	BP	3	4.11788158312053e-05
GO:0050755	chemokine metabolic process	BP	3	4.11788158312053e-05
GO:0045073	regulation of chemokine biosynthetic process	BP	3	3.35620207871249e-05
GO:0035914	skeletal muscle cell differentiation	BP	3	0.003137200967716
GO:0042108	positive regulation of cytokine biosynthetic process	BP	3	0.00300805143618482
GO:0042379	chemokine receptor binding	MF	3	0.00288223341188787
GO:0002548	monocyte chemotaxis	BP	3	0.00275971812455496
GO:0061900	glial cell activation	BP	3	0.00199205486951704
GO:0032722	positive regulation of chemokine production	BP	3	0.00199205486951704
GO:0072528	pyrimidine-containing compound biosynthetic process	BP	3	0.00180068174920572
GO:0032964	collagen biosynthetic process	BP	3	0.00153591361684877
GO:0008009	chemokine activity	MF	3	0.00122298888089622
GO:0010712	regulation of collagen metabolic process	BP	3	0.00122298888089622
GO:0032965	regulation of collagen biosynthetic process	BP	3	0.000892843986702787
GO:0150077	regulation of neuroinflammatory response	BP	3	0.000725349266206934
GO:0060252	positive regulation of glial cell proliferation	BP	2	0.00297427361602502
GO:0002922	positive regulation of humoral immune response	BP	2	0.00297427361602502
GO:0002726	positive regulation of T cell cytokine production	BP	2	0.00297427361602502
GO:0043174	nucleoside salvage	BP	2	0.00210474825853772
GO:0033549	MAP kinase phosphatase activity	MF	2	0.00184680207819941
GO:0032352	positive regulation of hormone metabolic process	BP	2	0.00184680207819941
GO:0017017	MAP kinase tyrosine/serine/threonine phosphatase activity	MF	2	0.00137959338577143
GO:0045080	positive regulation of chemokine biosynthetic process	BP	2	0.00117061406642228
GO:0046886	positive regulation of hormone biosynthetic process	BP	2	0.00097824171897694
GO:0043097	pyrimidine nucleoside salvage	BP	2	0.00097824171897694
GO:0008655	pyrimidine-containing compound salvage	BP	2	0.00097824171897694

## Sheet: 0.22 x control - DOWN - Supplem
Supplementary Table 2: Gene Ontology analysis of DEG’s up- and down-regulated on U87-glial-like cells over 10 days of Fluoride exposure. Group comparison is given on separated sheets. The “GO ID” gives the identification number and “term” displays the full name of the corresponding GO term. “Ontology” column shows the term classification on the main three biological classes. The total number of d…
GO ID	Term	Ontology	Number of DE	Adj. P-value
GO:0043226	organelle	CC	43	0.00204968369571865
GO:0043227	membrane-bounded organelle	CC	42	0.000531894126948409
GO:0012505	endomembrane system	CC	25	5.83084139783066e-06
GO:0042221	response to chemical	BP	22	0.000748981179304833
GO:0043412	macromolecule modification	BP	21	0.000570240954367059
GO:0006464	cellular protein modification process	BP	20	0.00082832056314828
GO:0036211	protein modification process	BP	20	0.00082832056314828
GO:0070887	cellular response to chemical stimulus	BP	18	0.000348366628139097
GO:0051239	regulation of multicellular organismal process	BP	16	0.00283127070965155
GO:0010033	response to organic substance	BP	16	0.00323261225612027
GO:0019220	regulation of phosphate metabolic process	BP	12	0.000940282406366678
GO:0051174	regulation of phosphorus metabolic process	BP	12	0.000949452945222069
GO:0031399	regulation of protein modification process	BP	12	0.00119885807439783
GO:0031401	positive regulation of protein modification process	BP	10	0.000587415259100123
GO:0044432	endoplasmic reticulum part	CC	10	0.00122649044324934
GO:0051094	positive regulation of developmental process	BP	10	0.00167080531971437
GO:0010243	response to organonitrogen compound	BP	9	0.000526661240771196
GO:1901698	response to nitrogen compound	BP	9	0.000983380217031094
GO:1901701	cellular response to oxygen-containing compound	BP	9	0.00132328085282583
GO:0045937	positive regulation of phosphate metabolic process	BP	9	0.00136445619273166
GO:0010562	positive regulation of phosphorus metabolic process	BP	9	0.00136445619273166
GO:0030334	regulation of cell migration	BP	8	0.00172428734515876
GO:2000145	regulation of cell motility	BP	8	0.00256039280579755
GO:0001934	positive regulation of protein phosphorylation	BP	8	0.00263971425147739
GO:1901137	carbohydrate derivative biosynthetic process	BP	7	0.00228708271871468
GO:0062023	collagen-containing extracellular matrix	CC	6	0.000397128052110912
GO:0050900	leukocyte migration	BP	6	0.00116578350110376
GO:0031012	extracellular matrix	CC	6	0.00152574267281332
GO:0030335	positive regulation of cell migration	BP	6	0.00180922551281221
GO:2000147	positive regulation of cell motility	BP	6	0.00224764368572259
GO:0051272	positive regulation of cellular component movement	BP	6	0.00260383544476795
GO:0040017	positive regulation of locomotion	BP	6	0.00290377967921709
GO:0071396	cellular response to lipid	BP	6	0.00320308597399379
GO:0048771	tissue remodeling	BP	5	6.7230960230098e-05
GO:0043542	endothelial cell migration	BP	5	0.000478239915551626
GO:0005996	monosaccharide metabolic process	BP	5	0.000648728140781867
GO:0008202	steroid metabolic process	BP	5	0.00113720183057391
GO:0010631	epithelial cell migration	BP	5	0.00147400260992978
GO:0090132	epithelium migration	BP	5	0.00153024819140042
GO:0090130	tissue migration	BP	5	0.00164747546624334
GO:0001503	ossification	BP	5	0.00254962007216462
GO:0019216	regulation of lipid metabolic process	BP	5	0.00289747307105088
GO:0046849	bone remodeling	BP	4	6.34222414198685e-05
GO:0005178	integrin binding	MF	4	0.000278624636670051
GO:0008194	UDP-glycosyltransferase activity	MF	4	0.00046420870706421
GO:0071466	cellular response to xenobiotic stimulus	BP	4	0.000896788942738333
GO:0030278	regulation of ossification	BP	4	0.00139892518990653
GO:0030595	leukocyte chemotaxis	BP	4	0.00200493646930962
GO:2000811	negative regulation of anoikis	BP	3	8.53818129576506e-06
GO:2000209	regulation of anoikis	BP	3	2.51159233974879e-05
GO:0043276	anoikis	BP	3	7.30169539014466e-05
GO:0045124	regulation of bone resorption	BP	3	0.000119345983011169
GO:0046850	regulation of bone remodeling	BP	3	0.000206137951694536
GO:0030199	collagen fibril organization	BP	3	0.000292655983279225
GO:0045453	bone resorption	BP	3	0.000440275876300009
GO:0033627	cell adhesion mediated by integrin	BP	3	0.000577574345705785
GO:0002690	positive regulation of leukocyte chemotaxis	BP	3	0.00118327618418747
GO:0034103	regulation of tissue remodeling	BP	3	0.00122298888089622
GO:0071674	mononuclear cell migration	BP	3	0.00130491664471281
GO:0001523	retinoid metabolic process	BP	3	0.00197589084833703
GO:0016101	diterpenoid metabolic process	BP	3	0.00231834343935455
GO:0002688	regulation of leukocyte chemotaxis	BP	3	0.00256585673207785
GO:0006721	terpenoid metabolic process	BP	3	0.00296679434589875
GO:0019218	regulation of steroid metabolic process	BP	3	0.00325433655074794
GO:0052696	flavonoid glucuronidation	BP	2	0.000199577104948012
GO:0098643	banded collagen fibril	CC	2	0.00030397854518252
GO:0005583	fibrillar collagen trimer	CC	2	0.00030397854518252
GO:0033629	negative regulation of cell adhesion mediated by integrin	BP	2	0.00030397854518252
GO:0052697	xenobiotic glucuronidation	BP	2	0.00030397854518252
GO:0045779	negative regulation of bone resorption	BP	2	0.000429781071613284
GO:0009812	flavonoid metabolic process	BP	2	0.000576786164614068
GO:0046851	negative regulation of bone remodeling	BP	2	0.000576786164614068
GO:0033151	V(D)J recombination	BP	2	0.000576786164614068
GO:2000647	negative regulation of stem cell proliferation	BP	2	0.000836617654491226
GO:0052695	cellular glucuronidation	BP	2	0.000933616672120177
GO:0098644	complex of collagen trimers	CC	2	0.000933616672120177
GO:0034104	negative regulation of tissue remodeling	BP	2	0.00103576942566714
GO:0005385	zinc ion transmembrane transporter activity	MF	2	0.00103576942566714
GO:0071577	zinc ion transmembrane transport	BP	2	0.00125543945854376
GO:0071305	cellular response to vitamin D	BP	2	0.00137290860200033
GO:0072509	divalent inorganic cation transmembrane transporter activity	MF	2	0.00149543520914604
GO:0019585	glucuronate metabolic process	BP	2	0.00149543520914604
GO:0006063	uronic acid metabolic process	BP	2	0.00149543520914604
GO:0006829	zinc ion transport	BP	2	0.00189312157928455
GO:0045939	negative regulation of steroid metabolic process	BP	2	0.00233547087974713
GO:0006517	protein deglycosylation	BP	2	0.00233547087974713
GO:0071295	cellular response to vitamin	BP	2	0.00265487007751042
GO:0019956	chemokine binding	MF	2	0.00265487007751042
GO:0015020	glucuronosyltransferase activity	MF	2	0.00282184967338183
GO:0002701	negative regulation of production of molecular mediator of immune response	BP	2	0.00317025314961148
GO:0035921	desmosome disassembly	BP	1	0.00239164388910584
GO:0034677	integrin alpha7-beta1 complex	CC	1	0.00239164388910584
GO:1900387	negative regulation of cell-cell adhesion by negative regulation of transcription from RNA polymerase II promoter	BP	1	0.00239164388910584
GO:2001229	negative regulation of response to gamma radiation	BP	1	0.00239164388910584
GO:1905513	negative regulation of short-term synaptic potentiation	BP	1	0.00239164388910584
GO:0032072	regulation of restriction endodeoxyribonuclease activity	BP	1	0.00239164388910584
GO:1905512	regulation of short-term synaptic potentiation	BP	1	0.00239164388910584
GO:1904391	response to ciliary neurotrophic factor	BP	1	0.00239164388910584
GO:1904373	response to kainic acid	BP	1	0.00239164388910584
GO:1904389	rod bipolar cell differentiation	BP	1	0.00239164388910584

## Sheet: 0.22 x control - UP - Supplemen
Supplementary Table 2: Gene Ontology analysis of DEG’s up- and down-regulated on U87-glial-like cells over 10 days of Fluoride exposure. Group comparison is given on separated sheets. The “GO ID” gives the identification number and “term” displays the full name of the corresponding GO term. “Ontology” column shows the term classification on the main three biological classes. The total number of d…
GO ID	Term	Ontology	Number of DE	Adj. P-value
GO:0032502	developmental process	BP	47	0.000535900690291097
GO:0048856	anatomical structure development	BP	46	0.00020582193526993
GO:0007275	multicellular organism development	BP	41	0.00112004639677758
GO:0048731	system development	BP	38	0.000988327292649065
GO:0048513	animal organ development	BP	32	0.00024073250086416
GO:0012501	programmed cell death	BP	21	0.00113793302874706
GO:0006915	apoptotic process	BP	20	0.00117796550466321
GO:0042981	regulation of apoptotic process	BP	18	0.000546517975190508
GO:0043067	regulation of programmed cell death	BP	18	0.000661823667893527
GO:0010941	regulation of cell death	BP	18	0.00153782335977139
GO:0005102	signaling receptor binding	MF	17	0.00190598702388931
GO:0034097	response to cytokine	BP	16	0.000218156238632315
GO:0001775	cell activation	BP	16	0.00142888149653299
GO:0000165	MAPK cascade	BP	14	0.000203104539318557
GO:0023014	signal transduction by protein phosphorylation	BP	14	0.000228376405959148
GO:0071345	cellular response to cytokine stimulus	BP	14	0.000947769681472838
GO:0043565	sequence-specific DNA binding	MF	14	0.00113300458537824
GO:0045944	positive regulation of transcription by RNA polymerase II	BP	14	0.00191082667531861
GO:0019221	cytokine-mediated signaling pathway	BP	13	0.000121067872962726
GO:0051707	response to other organism	BP	13	0.00116904781893116
GO:0043207	response to external biotic stimulus	BP	13	0.00119008480017401
GO:0009607	response to biotic stimulus	BP	13	0.00157232401125465
GO:0033993	response to lipid	BP	12	0.00163591753674289
GO:0009617	response to bacterium	BP	11	0.000556612106515375
GO:0043408	regulation of MAPK cascade	BP	11	0.00120027338695808
GO:0030545	receptor regulator activity	MF	10	0.000244585664727745
GO:0050865	regulation of cell activation	BP	10	0.0007721487863891
GO:0031400	negative regulation of protein modification process	BP	10	0.00081136951150101
GO:0070371	ERK1 and ERK2 cascade	BP	9	2.31812863316506e-05
GO:0048018	receptor ligand activity	MF	9	0.000545051363318753
GO:0045936	negative regulation of phosphate metabolic process	BP	9	0.0021250864837576
GO:0010563	negative regulation of phosphorus metabolic process	BP	9	0.0021496694769145
GO:0005126	cytokine receptor binding	MF	8	7.46389610716617e-05
GO:0070372	regulation of ERK1 and ERK2 cascade	BP	8	0.000104002730607024
GO:0032496	response to lipopolysaccharide	BP	8	0.000199785483349101
GO:0002237	response to molecule of bacterial origin	BP	8	0.000259402270287108
GO:0001933	negative regulation of protein phosphorylation	BP	8	0.00112578963898297
GO:0001819	positive regulation of cytokine production	BP	8	0.00184654916398401
GO:0042326	negative regulation of phosphorylation	BP	8	0.00194798691260475
GO:0097529	myeloid leukocyte migration	BP	7	7.21132072459276e-05
GO:0005125	cytokine activity	MF	7	9.6480427052508e-05
GO:0043270	positive regulation of ion transport	BP	7	0.00037824494197528
GO:0043409	negative regulation of MAPK cascade	BP	6	0.000271389914093916
GO:0071222	cellular response to lipopolysaccharide	BP	6	0.000482670529884045
GO:0071219	cellular response to molecule of bacterial origin	BP	6	0.000576060238831035
GO:0030595	leukocyte chemotaxis	BP	6	0.000768236908502102
GO:0006469	negative regulation of protein kinase activity	BP	6	0.000984841576658148
GO:0071216	cellular response to biotic stimulus	BP	6	0.00100664316515631
GO:0033673	negative regulation of kinase activity	BP	6	0.00155646695821554
GO:0032611	interleukin-1 beta production	BP	5	0.000130589049884035
GO:0030593	neutrophil chemotaxis	BP	5	0.000149895206895286
GO:0032612	interleukin-1 production	BP	5	0.000239912655433452
GO:1990266	neutrophil migration	BP	5	0.00027040104715143
GO:0042089	cytokine biosynthetic process	BP	5	0.000327649124313267
GO:0071621	granulocyte chemotaxis	BP	5	0.000327649124313267
GO:0042107	cytokine metabolic process	BP	5	0.000340121646626814
GO:0097530	granulocyte migration	BP	5	0.000612241204299514
GO:0042129	regulation of T cell proliferation	BP	5	0.00096556720534802
GO:0071347	cellular response to interleukin-1	BP	5	0.00177529537383252
GO:0042098	T cell proliferation	BP	5	0.00200243481086542
GO:0008009	chemokine activity	MF	4	9.19723665288912e-05
GO:0042379	chemokine receptor binding	MF	4	0.000293813329873899
GO:0042108	positive regulation of cytokine biosynthetic process	BP	4	0.000311317392490933
GO:0070373	negative regulation of ERK1 and ERK2 cascade	BP	4	0.000455434399039399
GO:0043407	negative regulation of MAP kinase activity	BP	4	0.000556338105127645
GO:0032642	regulation of chemokine production	BP	4	0.000672196196866397
GO:0070098	chemokine-mediated signaling pathway	BP	4	0.00087661271969564
GO:0032602	chemokine production	BP	4	0.000914494217394859
GO:0032651	regulation of interleukin-1 beta production	BP	4	0.000953514591003211
GO:0042102	positive regulation of T cell proliferation	BP	4	0.00116635257216216
GO:1990869	cellular response to chemokine	BP	4	0.00126011268610706
GO:1990868	response to chemokine	BP	4	0.00126011268610706
GO:1903426	regulation of reactive oxygen species biosynthetic process	BP	4	0.00146323738909506
GO:0032652	regulation of interleukin-1 production	BP	4	0.00157289875037434
GO:0045073	regulation of chemokine biosynthetic process	BP	3	4.77396920389939e-05
GO:0042033	chemokine biosynthetic process	BP	3	5.8550517645807e-05
GO:0050755	chemokine metabolic process	BP	3	5.8550517645807e-05
GO:0032966	negative regulation of collagen biosynthetic process	BP	3	7.08478091416158e-05
GO:0010713	negative regulation of collagen metabolic process	BP	3	8.47193814206474e-05
GO:0150078	positive regulation of neuroinflammatory response	BP	3	8.47193814206474e-05
GO:0030224	monocyte differentiation	BP	3	0.000695977611582145
GO:1903131	mononuclear cell differentiation	BP	3	0.000695977611582145
GO:0150077	regulation of neuroinflammatory response	BP	3	0.00102108574903214
GO:0032965	regulation of collagen biosynthetic process	BP	3	0.00125537279104972
GO:0010712	regulation of collagen metabolic process	BP	3	0.0017161607806276
GO:0032964	collagen biosynthetic process	BP	3	0.00215186133764795
GO:0031394	positive regulation of prostaglandin biosynthetic process	BP	2	0.000342361772630026
GO:2001280	positive regulation of unsaturated fatty acid biosynthetic process	BP	2	0.000635053544264625
GO:0097011	cellular response to granulocyte macrophage colony-stimulating factor stimulus	BP	2	0.000813925604163292
GO:0097012	response to granulocyte macrophage colony-stimulating factor	BP	2	0.000813925604163292
GO:0060573	cell fate specification involved in pattern specification	BP	2	0.00123568047294635
GO:0046886	positive regulation of hormone biosynthetic process	BP	2	0.00123568047294635
GO:0043097	pyrimidine nucleoside salvage	BP	2	0.00123568047294635
GO:0008655	pyrimidine-containing compound salvage	BP	2	0.00123568047294635
GO:0021521	ventral spinal cord interneuron specification	BP	2	0.00123568047294635
GO:0045080	positive regulation of chemokine biosynthetic process	BP	2	0.00147815105639837
GO:0031392	regulation of prostaglandin biosynthetic process	BP	2	0.00147815105639837
GO:0017017	MAP kinase tyrosine/serine/threonine phosphatase activity	MF	2	0.00174141135334035
GO:0045086	positive regulation of interleukin-2 biosynthetic process	BP	2	0.00174141135334035
GO:2001279	regulation of unsaturated fatty acid biosynthetic process	BP	2	0.00202525888408553
